# Supplementary material for: Untargeted serum metabolomics and air pollution in Parkinson’s disease
Source: Research Square preprint supplement (doi:10.21203/rs.3.rs-8857902/v1), 2026-03-02
Supplement: Supplementary file 2 [file 74bbfe3551ecc7caef70c599.xlsx]

## Sheet: Reference
Reference	Biosample	Pollutant
Chu et al., 2021	Plasma	PM2.5	Chu, H.; Huang, F.Q.; Yuan, Q.; Fan, Y.; Xin, J.; Du, M.; Wang, M.; Zhang, Z.; Ma, G. Metabolomics identifying biomarkers of PM(2.5) exposure for vulnerable population: based on a prospective cohort study. Environ Sci Pollut Res Int 2021;28:14586-14596
Du et al., 2022	Serum	PM2.5, CO, NO2	Du, X.; Zhang, Q.; Jiang, Y.; Li, H.; Zhu, X.; Zhang, Y.; Liu, C.; Niu, Y.; Ji, J.; Jiang, C.; Cai, J.; Chen, R.; Kan, H. Dynamic molecular choreography induced by traffic exposure: A randomized, crossover trial using multi-omics profiling. J Hazard Mater 2022;424:127359
Feng et al., 2021	Plasma	PM2.5	Feng, B.; Liu, C.; Yi, T.; Song, X.; Wang, Y.; Liu, S.; Chen, J.; Zhao, Q.; Zhang, Y.; Wang, T.; Xu, H.; Rajagopalan, S.; Brook, R.; Li, J.; Zheng, L.; Huang, W. Perturbation of amino acid metabolism mediates air pollution associated vascular dysfunction in healthy adults. Environ Res 2021;201:111512
Gao et al., 2021	Plasma	PM2.5	Gao, S.; Zhuo, Z.; Hutchinson, J.; Su, L.; Christiani, D.C. Metabolomic profiling identifies plasma sphingosine 1-phosphate levels associated with welding exposures. Occup Environ Med 2021;78:255-261
Gaskins et al., 2021	Serum	PM2.5 and NO2	Gaskins, A.J.; Tang, Z.; Hood, R.B.; Ford, J.; Schwartz, J.D.; Jones, D.P.; Laden, F.; Liang, D.; Team, E.S. Periconception air pollution, metabolomic biomarkers, and fertility among women undergoing assisted reproduction. Environ Int 2021;155:106666
Hood et al., 2022	Serum	PM2.5	Hood, R.B.; Liang, D.; Tang, Z.; Kloog, I.; Schwartz, J.; Laden, F.; Jones, D.; Gaskins, A.J. Length of PM(2.5) exposure and alterations in the serum metabolome among women undergoing infertility treatment. Environ Epidemiol 2022;6:e191
Jeong et al., 2018	Serum	PM2.5 and NO2	Jeong, A.; Fiorito, G.; Keski-Rahkonen, P.; Imboden, M.; Kiss, A.; Robinot, N.; Gmuender, H.; Vlaanderen, J.; Vermeulen, R.; Kyrtopoulos, S.; Herceg, Z.; Ghantous, A.; Lovison, G.; Galassi, C.; Ranzi, A.; Krogh, V.; Grioni, S.; Agnoli, C.; Sacerdote, C.; Mostafavi, N.; Naccarati, A.; Scalbert, A.; Vineis, P.; Probst-Hensch, N.; Consortium, E.X. Perturbation of metabolic pathways mediates the asso…
Li et al., 2017	Serum	PM2.5	Li, H.; Cai, J.; Chen, R.; Zhao, Z.; Ying, Z.; Wang, L.; Chen, J.; Hao, K.; Kinney, P.L.; Chen, H.; Kan, H. Particulate Matter Exposure and Stress Hormone Levels: A Randomized, Double-Blind, Crossover Trial of Air Purification. Circulation 2017;136:618-627
Li et al., 2021	Plasma	PM2.5, CO, NO2	Li, Z.; Liang, D.; Ye, D.; Chang, H.H.; Ziegler, T.R.; Jones, D.P.; Ebelt, S.T. Application of high-resolution metabolomics to identify biological pathways perturbed by traffic-related air pollution. Environ Res 2021;193:110506
Liang et al., 2019	Plasma	PM2.5	Liang, D.; Ladva, C.N.; Golan, R.; Yu, T.; Walker, D.I.; Sarnat, S.E.; Greenwald, R.; Uppal, K.; Tran, V.; Jones, D.P.; Russell, A.G.; Sarnat, J.A. Perturbations of the arginine metabolome following exposures to traffic-related air pollution in a panel of commuters with and without asthma. Environ Int 2019;127:503-513
Liang et al., 2018	Plasma	PM2.5, CO, NO2	Liang, D.; Moutinho, J.L.; Golan, R.; Yu, T.; Ladva, C.N.; Niedzwiecki, M.; Walker, D.I.; Sarnat, S.E.; Chang, H.H.; Greenwald, R.; Jones, D.P.; Russell, A.G.; Sarnat, J.A. Use of high-resolution metabolomics for the identification of metabolic signals associated with traffic-related air pollution. Environ Int 2018;120:145-154
Liao et al., 2022	Serum	PM2.5 and NO2	Liao, J.; Gheissari, R.; Thomas, D.C.; Gilliland, F.D.; Lurmann, F.; Islam, K.T.; Chen, Z. Transcriptomic and metabolomic associations with exposures to air pollutants among young adults with childhood asthma history. Environ Pollut 2022;299:118903
Mu et al., 2019	Serum	PM2.5	Mu, L.; Niu, Z.; Blair, R.H.; Yu, H.; Browne, R.W.; Bonner, M.R.; Fanter, T.; Deng, F.; Swanson, M. Metabolomics Profiling before, during, and after the Beijing Olympics: A Panel Study of Within-Individual Differences during Periods of High and Low Air Pollution. Environ Health Perspect 2019;127:57010
Nassan et al., 2021a	Plasma	PM2.5 and NO2	Nassan, F.L.; Kelly, R.S.; Kosheleva, A.; Koutrakis, P.; Vokonas, P.S.; Lasky-Su, J.A.; Schwartz, J.D. Metabolomic signatures of the long-term exposure to air pollution and temperature. Environ Health 2021;20:3
Nassan et al., 2021b	Plasma	PM2.5 and NO2	Nassan, F.L.; Kelly, R.S.; Koutrakis, P.; Vokonas, P.S.; Lasky-Su, J.A.; Schwartz, J.D. Metabolomic signatures of the short-term exposure to air pollution and temperature. Environ Res 2021;201:111553
Ritz et al., 2022	Serum	PM2.5	Ritz, B.; Yan, Q.; He, D.; Wu, J.; Walker, D.I.; Uppal, K.; Jones, D.P.; Heck, J.E. Child serum metabolome and traffic-related air pollution exposure in pregnancy. Environ Res 2022;203:111907
Tang et al. 2022	Plasma	PM2.5	Tang, Z.; Sarnat, J.A.; Weber, R.J.; Russell, A.G.; Zhang, X.; Li, Z.; Yu, T.; Jones, D.P.; Liang, D. The Oxidative Potential of Fine Particulate Matter and Biological Perturbations in Human Plasma and Saliva Metabolome. Environ Sci Technol 2022;56:7350-7361
van Veldhoven et al., 2019	Serum	PM2.5 and NO2	van Veldhoven, K.; Kiss, A.; Keski-Rahkonen, P.; Robinot, N.; Scalbert, A.; Cullinan, P.; Chung, K.F.; Collins, P.; Sinharay, R.; Barratt, B.M.; Nieuwenhuijsen, M.; Rodoreda, A.A.; Carrasco-Turigas, G.; Vlaanderen, J.; Vermeulen, R.; Portengen, L.; Kyrtopoulos, S.A.; Ponzi, E.; Chadeau-Hyam, M.; Vineis, P. Impact of short-term traffic-related air pollution on the metabolome - Results from two met…
Wei et al., 2013	Plasma	PM2.5	Wei, Y.; Wang, Z.; Chang, C.Y.; Fan, T.; Su, L.; Chen, F.; Christiani, D.C. Global metabolomic profiling reveals an association of metal fume exposure and plasma unsaturated fatty acids. PLoS One 2013;8:e77413
Yan et al., 2019	Serum	PM2.5 and CO	Yan, Q.; Liew, Z.; Uppal, K.; Cui, X.; Ling, C.; Heck, J.E.; von Ehrenstein, O.S.; Wu, J.; Walker, D.I.; Jones, D.P.; Ritz, B. Maternal serum metabolome and traffic-related air pollution exposure in pregnancy. Environ Int 2019;130:104872
Zhao et al., 2022	Serum	PM2.5	Zhao, L.; Fang, J.; Tang, S.; Deng, F.; Liu, X.; Shen, Y.; Liu, Y.; Kong, F.; Du, Y.; Cui, L.; Shi, W.; Wang, Y.; Wang, J.; Zhang, Y.; Dong, X.; Gao, Y.; Dong, L.; Zhou, H.; Sun, Q.; Dong, H.; Peng, X.; Zhang, Y.; Cao, M.; Wang, Y.; Zhi, H.; Du, H.; Zhou, J.; Li, T.; Shi, X. PM2.5 and Serum Metabolome and Insulin Resistance, Potential Mediation by the Gut Microbiome: A Population-Based Panel Stud…

## Sheet: Annotation
Metabolite	Direction	Pollutant	Reference
Glutamine	not reported	PM2.5	Chu et al., 2021
Prostaglandin	not reported	PM2.5	Chu et al., 2021
Linoleic acid	down	PM2.5	Du et al., 2022
Serine	up	CO	Du et al., 2022
Linoleic acid	down	CO	Du et al., 2022
Aspartate	up	CO	Du et al., 2022
Taurine	up	CO	Du et al., 2022
Nicotinamide	up	CO	Du et al., 2022
Arachidonic acid	down	CO	Du et al., 2022
Glutamine	up	CO	Du et al., 2022
Leukotriene	up	CO	Du et al., 2022
Prostaglandin	down	CO	Du et al., 2022
Tyrosine	down	CO	Du et al., 2022
Alanine	up	CO	Du et al., 2022
Serine	up	NO2	Du et al., 2022
Aspartate	up	NO2	Du et al., 2022
Arginine	up	NO2	Du et al., 2022
Linoleic acid	down	NO2	Du et al., 2022
Taurine	up	NO2	Du et al., 2022
Glutamine	up	NO2	Du et al., 2022
Leukotriene	up	NO2	Du et al., 2022
Arachidonic acid	down	NO2	Du et al., 2022
Prostaglandin	down	NO2	Du et al., 2022
Arginine	up	PM2.5	Feng et al., 2021
Glutamine	up	PM2.5	Feng et al., 2021
Serine	up	PM2.5	Feng et al., 2021
Alanine	up	PM2.5	Feng et al., 2021
Arginine	not reported	PM2.5	Gao et al., 2021
Retinol	not reported	PM2.5	Hood et al., 2022
Serine	not reported	PM2.5	Hood et al., 2022
Aspartate	not reported	PM2.5	Hood et al., 2022
Cortisol	up	PM2.5	Li et al., 2017
Alanine	up	PM2.5	Li et al., 2017
Tyrosine	up	PM2.5	Li et al., 2017
Arginine	up	PM2.5	Li et al., 2017
Glutamate	up	PM2.5	Li et al., 2017
Linoleic acid	up	PM2.5	Li et al., 2017
Prostaglandin	up	PM2.5	Li et al., 2017
Linoleic acid	down	PM2.5	Liang et al., 2018
Aspartate	down	PM2.5	Liao et al., 2022
Serine	down	PM2.5	Liao et al., 2022
Arginine	up	PM2.5	Liao et al., 2022
Alanine	down	PM2.5	Liao et al., 2022
Aspartate	down	NO2	Liao et al., 2022
Serine	down	NO2	Liao et al., 2022
Arginine	up	NO2	Liao et al., 2022
Alanine	down	NO2	Liao et al., 2022
Nicotinamide	up	PM2.5	Mu et al., 2019
Eicosatrienoic acid	up	PM2.5	Mu et al., 2019
Arachidonic acid	up	PM2.5	Mu et al., 2019
Aspartate	down	PM2.5	Nassan et al., 2021a
Taurine	down	PM2.5	Nassan et al., 2021a
Nicotinamide	down	PM2.5	Nassan et al., 2021a
Alanine	down	PM2.5	Nassan et al., 2021a
Nicotinamide	down	NO2	Nassan et al., 2021b
Linoleic acid	down	NO2	Nassan et al., 2021b
Taurine	down	PM2.5	Nassan et al., 2021b
Arginine	up	PM2.5	Nassan et al., 2021b
Aspartate	down	NO2	Nassan et al., 2021b
Taurine	down	NO2	Nassan et al., 2021b
Retinol	down	NO2	Nassan et al., 2021b
Docosahexaenoic acid	down	NO2	Nassan et al., 2021b
Arachidonic acid	up	PM2.5	Ritz et al., 2022
Alanine	down	NO2	van Veldhoven et al., 2019
Eicosatrienoic acid	down	PM2.5	Wei et al., 2013
Linoleic acid	down	PM2.5	Wei et al., 2013
Serine	down	PM2.5	Yan et al., 2019
Linoleic acid	down	PM2.5	Yan et al., 2019
Cystine	not reported	PM2.5	Zhao et al., 2022
Suberate	up	NO2	Nassan et al., 2021b
5-Methylthioadenosine	up	PM2.5	Nassan et al., 2021a
5-Methylthioadenosine	up	PM2.5	Nassan et al., 2021b
2-Hydroxyadipate	not reported	PM2.5	Zhao et al., 2022
Cysteine	down	PM2.5	Huan et al., 2021
Cysteine	down	NO2	Nassan et al., 2021b
Cysteine	not reported	PM2.5	Zhao et al., 2022
Glutamate	down	PM2.5	Mu et al., 2019

## Sheet: Pathway
Pathway	Pollutant	Reference
Butanoate metabolism	PM2.5	Gaskins et al., 2021
Alanine/aspartate metabolism	PM2.5	Gaskins et al., 2021
Tyrosine metabolism	PM2.5	Gaskins et al., 2021
Urea cycle/amino group metabolism	PM2.5	Gaskins et al., 2021
Alanine/aspartate/glutamate metabolism	PM2.5	Gaskins et al., 2021
Valine/leucine/isoleucine degradation	PM2.5	Gaskins et al., 2021
Glycerophospholipid metabolism	CO	Liang et al., 2018
Vitamin B3 (nicotinate/nicotinamide) metabolism	PM2.5	Gaskins et al., 2021
Pyrimidine metabolism	PM2.5	Gaskins et al., 2021
Butanoate metabolism	NO2	Gaskins et al., 2021
Alanine/aspartate metabolism	NO2	Gaskins et al., 2021
Tyrosine metabolism	NO2	Gaskins et al., 2021
Urea cycle/amino group metabolism	NO2	Gaskins et al., 2021
Alanine/aspartate/glutamate metabolism	NO2	Gaskins et al., 2021
Valine/leucine/isoleucine degradation	NO2	Gaskins et al., 2021
Glycerophospholipid metabolism	NO2	Gaskins et al., 2021
Vitamin B3 (nicotinate/nicotinamide) metabolism	NO2	Gaskins et al., 2021
Pyrimidine metabolism	NO2	Gaskins et al., 2021
Alanine/aspartate/glutamate metabolism	PM2.5	Hood et al., 2022
Glycine/serine/alanine/threonine metabolism	PM2.5	Hood et al., 2022
Alanine/aspartate metabolism	PM2.5	Hood et al., 2022
Prostaglandin formation from arachidonate	PM2.5	Hood et al., 2022
Urea cycle/amino group metabolism	PM2.5	Hood et al., 2022
Arginine/proline metabolism	PM2.5	Hood et al., 2022
De novo fatty acid biosynthesis	PM2.5	Hood et al., 2022
Fatty acid activation	PM2.5	Hood et al., 2022
Fatty acid metabolism	PM2.5	Hood et al., 2022
Arachidonic acid metabolism	PM2.5	Hood et al., 2022
Vitamin A (retinol) metabolism	PM2.5	Hood et al., 2022
Linoleic acid metabolism	PM2.5	Hood et al., 2022
Linoleic acid metabolism	PM2.5	Jeong et al., 2018
Pyrimidine metabolism	NO2	Jeong et al., 2018
Alanine/aspartate metabolism	PM2.5	Jeong et al., 2018
Arginine/proline metabolism	PM2.5	Jeong et al., 2018
Arginine/proline metabolism	NO2	Jeong et al., 2018
Valine/leucine/isoleucine degradation	PM2.5	Jeong et al., 2018
Valine/leucine/isoleucine degradation	NO2	Jeong et al., 2018
De novo fatty acid biosynthesis	PM2.5	Jeong et al., 2018
Fatty acid activation	PM2.5	Jeong et al., 2018
Butanoate metabolism	PM2.5	Jeong et al., 2018
Butanoate metabolism	NO2	Jeong et al., 2018
Fatty acid metabolism	NO2	Jeong et al., 2018
Pyrimidine metabolism	PM2.5	Jeong et al., 2018
Tyrosine metabolism	PM2.5	Jeong et al., 2018
Urea cycle/amino group metabolism	PM2.5	Jeong et al., 2018
Urea cycle/amino group metabolism	NO2	Jeong et al., 2018
Glycerophospholipid metabolism	NO2	Jeong et al., 2018
Glycerophospholipid metabolism	NO2	Liang et al., 2018
Linoleic acid metabolism	NO2	Jeong et al., 2018
Vitamin A (retinol) metabolism	NO2	Li et al., 2021
Pyrimidine metabolism	NO2	Li et al., 2021
Alanine/aspartate metabolism	NO2	Li et al., 2021
Pyrimidine metabolism	CO	Li et al., 2021
Tyrosine metabolism	CO	Li et al., 2021
De novo fatty acid biosynthesis	PM2.5	Li et al., 2021
Fatty acid activation	PM2.5	Li et al., 2021
Pyrimidine metabolism	PM2.5	Liang et al., 2019
Bile acid biosynthesis	PM2.5	Liang et al., 2019
Alanine/aspartate/glutamate metabolism	PM2.5	Liang et al., 2019
Drug metabolism - cytochrome P450	CO	Liang et al., 2018
Urea cycle/amino group metabolism	CO	Liang et al., 2018
Glycerophospholipid metabolism	NO2	Nassan et al., 2021b
Vitamin A (retinol) metabolism	CO	Liang et al., 2018
Butanoate metabolism	CO	Liang et al., 2018
Bile acid biosynthesis	CO	Liang et al., 2018
Tyrosine metabolism	CO	Liang et al., 2018
Pyrimidine metabolism	CO	Liang et al., 2018
Alanine/aspartate metabolism	NO2	Liang et al., 2018
Arginine/proline metabolism	NO2	Liang et al., 2018
Drug metabolism - cytochrome P450	NO2	Liang et al., 2018
Urea cycle/amino group metabolism	NO2	Liang et al., 2018
Glycerophospholipid metabolism	PM2.5	Gaskins et al., 2021
Butanoate metabolism	NO2	Liang et al., 2018
Tyrosine metabolism	NO2	Liang et al., 2018
Pyrimidine metabolism	NO2	Liang et al., 2018
Alanine/aspartate metabolism	PM2.5	Liang et al., 2018
Arginine/proline metabolism	PM2.5	Liang et al., 2018
Urea cycle/amino group metabolism	PM2.5	Liang et al., 2018
Glycerophospholipid metabolism	PM2.5	Jeong et al., 2018
Butanoate metabolism	PM2.5	Liang et al., 2018
Tyrosine metabolism	PM2.5	Liang et al., 2018
Pyrimidine metabolism	PM2.5	Liang et al., 2018
Vitamin A (retinol) metabolism	NO2	Liang et al., 2018
Drug metabolism - cytochrome P450	PM2.5	Liang et al., 2018
Vitamin A (retinol) metabolism	PM2.5	Liang et al., 2018
Arginine/proline metabolism	PM2.5	Liang et al., 2018
Alanine/aspartate metabolism	PM2.5	Liao et al., 2022
Arginine/proline metabolism	PM2.5	Liao et al., 2022
Glycine/serine/alanine/threonine metabolism	PM2.5	Liao et al., 2022
Alanine/aspartate metabolism	NO2	Liao et al., 2022
Arginine/proline metabolism	NO2	Liao et al., 2022
Glycine/serine/alanine/threonine metabolism	NO2	Liao et al., 2022
Glycerophospholipid metabolism	PM2.5	Liang et al., 2018
Prostaglandin formation from arachidonate	PM2.5	Nassan et al., 2021a
Alanine/aspartate metabolism	PM2.5	Nassan et al., 2021a
Glycine/serine/alanine/threonine metabolism	PM2.5	Nassan et al., 2021a
Glycine/serine/alanine/threonine metabolism	NO2	Nassan et al., 2021a
Vitamin B3 (nicotinate/nicotinamide) metabolism	NO2	Nassan et al., 2021b
Butanoate metabolism	NO2	Nassan et al., 2021b
Glycerophospholipid metabolism	PM2.5	Nassan et al., 2021a
Linoleic acid metabolism	NO2	Nassan et al., 2021b
Pyrimidine metabolism	PM2.5	Nassan et al., 2021b
De novo fatty acid biosynthesis	PM2.5	Ritz et al., 2022
Fatty acid activation	PM2.5	Ritz et al., 2022
Glycerophospholipid metabolism	PM2.5	Ritz et al., 2022
Arachidonic acid metabolism	PM2.5	Ritz et al., 2022
Fatty acid metabolism	PM2.5	Ritz et al., 2022
Prostaglandin formation from arachidonate	PM2.5	Ritz et al., 2022
Tyrosine metabolism	PM2.5	Tang et al. 2022
Drug metabolism - cytochrome P450	PM2.5	Tang et al. 2022
Alanine/aspartate/glutamate metabolism	PM2.5	Tang et al. 2022
Fatty acid metabolism	PM2.5	Tang et al. 2022
Linoleic acid metabolism	PM2.5	Tang et al. 2022
Tyrosine metabolism	PM2.5	Wei et al., 2013
Alanine/aspartate metabolism	PM2.5	Wei et al., 2013
Urea cycle/amino group metabolism	PM2.5	Yan et al., 2019
Glycerophospholipid metabolism	PM2.5	Yan et al., 2019
Linoleic acid metabolism	PM2.5	Yan et al., 2019
Glycine/serine/alanine/threonine metabolism	PM2.5	Yan et al., 2019
Pyrimidine metabolism	PM2.5	Yan et al., 2019
Fatty acid activation	PM2.5	Yan et al., 2019
De novo fatty acid biosynthesis	PM2.5	Yan et al., 2019
Fatty acid metabolism	PM2.5	Yan et al., 2019
Prostaglandin formation from arachidonate	PM2.5	Yan et al., 2019
Butanoate metabolism	PM2.5	Yan et al., 2019
Linoleic acid metabolism	PM2.5	Yan et al., 2019
Alanine/aspartate/glutamate metabolism	CO	Liang et al., 2018
Bile acid biosynthesis	PM2.5	Liang et al., 2018
Drug metabolism - cytochrome P450	NO2	Jeong et al., 2018
Glycerophospholipid metabolism	NO2	Zhao et al., 2022
