# Supplementary material for: Untargeted serum metabolomics and air pollution in Parkinson’s disease
Source: Research Square preprint supplement (doi:10.21203/rs.3.rs-8857902/v1), 2026-03-02
Supplement: Supplementary file 3 [file 9edc3bcd67b4a40409a2214b.xlsx]

## Sheet: MWAS
mode	pollutant	model	year	PD	mz	time	log2FC	LL	UL	AveExpr	t	P.Value	adj.P.Val	log2FC_peg1	LL_peg1	UL_peg1	AveExpr_peg1	t_peg1	P.Value_peg1	adj.P.Val_peg1	log2FC_peg2	LL_peg2	UL_peg2	AveExpr_peg2	t_peg2	P.Value_peg2	adj.P.Val_peg2	sig_nominal	shared_sig_nominal
hilic	pm2.5	lur	1	0	313.936	88.486	0.413818	0.195093	0.632543	20.9	3.7253	0.00023874	0.648422	0.430338	0.1658	0.694876	20.8964	3.20996	0.00157219	0.610012	0.425407	0.0197026	0.831111	20.9077	2.08711	0.0401021	0.855884	0	0
hilic	pm2.5	lur	1	0	570.619	66.933	1.03485	0.443568	1.62613	19.5912	3.44615	0.00066176	0.882898	1.18332	0.499612	1.86703	19.5173	3.41515	0.00078782	0.562886	0.861617	-0.368391	2.09162	19.754	1.3943	0.167135	0.855884	1	0
hilic	pm2.5	lur	1	0	226.951	81.37	0.187049	0.0726177	0.30148	30.7092	3.21856	0.00145	0.882898	0.21687	0.0720243	0.361715	30.7115	2.95442	0.00355146	0.808299	0.117052	-0.0734198	0.307524	30.7042	1.2232	0.224889	0.863414	0	0
hilic	pm2.5	lur	1	0	199.095	37.71	0.350023	0.134017	0.566029	21.8408	3.19067	0.00159161	0.882898	0.471467	0.230086	0.712847	21.812	3.85413	0.00016144	0.438483	0.038922	-0.433255	0.511099	21.9042	0.164074	0.870092	0.984244	0	0
hilic	pm2.5	lur	1	0	115.957	275.273	-0.429332	-0.703742	-0.154921	23.7108	-3.08066	0.00228456	0.882898	-0.382554	-0.716204	-0.0489041	23.72	-2.26245	0.0248645	0.883312	-0.451931	-0.95503	0.0511677	23.6906	-1.78801	0.0776087	0.855884	0	0
hilic	pm2.5	lur	1	0	447.837	85.227	-0.893	-1.46464	-0.321356	16.5201	-3.07593	0.00231976	0.882898	-0.638574	-1.34888	0.0717362	16.6722	-1.77395	0.0777623	0.883312	-1.39023	-2.35792	-0.422534	16.1851	-2.85955	0.005424	0.855884	0	0
hilic	pm2.5	lur	1	0	194.118	285.753	1.33064	0.474402	2.18687	20.5598	3.05998	0.00244244	0.882898	1.34959	0.297688	2.40149	20.4941	2.53166	0.0122081	0.883312	1.00473	-0.52546	2.53491	20.7044	1.30693	0.195026	0.855884	1	0
hilic	pm2.5	lur	1	0	382.056	92.51	-0.58939	-0.971801	-0.20698	18.9515	-3.03476	0.00264853	0.882898	-0.50628	-0.939092	-0.0734678	18.8797	-2.30818	0.0221263	0.883312	-0.736057	-1.55983	0.0877189	19.1095	-1.77849	0.0791693	0.855884	0	0
hilic	pm2.5	lur	1	0	183.01	268.644	0.124657	0.0409944	0.20832	21.809	2.93383	0.0036434	0.882898	0.0540438	-0.0237125	0.1318	21.8567	1.37148	0.171934	0.939583	0.281414	0.0617086	0.501119	21.7038	2.5495	0.0127227	0.855884	0	0
hilic	pm2.5	lur	1	0	227.2	28.649	-0.315644	-0.532223	-0.0990647	19.7319	-2.86967	0.0044428	0.882898	-0.247963	-0.505833	0.00990667	19.7964	-1.89743	0.0593729	0.883312	-0.408243	-0.832099	0.0156129	19.5898	-1.91713	0.0588366	0.855884	0	0
hilic	pm2.5	lur	1	0	400.918	71.845	0.195492	0.0605166	0.330468	22.796	2.85184	0.00469166	0.882898	0.285825	0.119407	0.452242	22.8081	3.38906	0.0008617	0.562886	0.0347359	-0.20786	0.277331	22.7694	0.285001	0.776389	0.965845	0	0
hilic	pm2.5	lur	1	0	285.004	81.605	0.220993	0.0668167	0.375169	23.4235	2.82236	0.00513123	0.882898	0.177117	-0.0154734	0.369708	23.35	1.8147	0.0712357	0.883312	0.290339	0.0128964	0.567781	23.5855	2.08297	0.0404886	0.855884	0	0
hilic	pm2.5	lur	1	0	313.273	276.994	0.225754	0.0678477	0.383661	21.0972	2.81505	0.00524573	0.882898	0.32487	0.130909	0.51883	21.0808	3.30502	0.00114611	0.562886	0.0597479	-0.228439	0.347935	21.1332	0.412666	0.680969	0.944899	0	0
hilic	pm2.5	lur	1	0	536.711	64.522	0.153385	0.0442352	0.262534	21.9852	2.76701	0.00605871	0.882898	0.178538	0.0474702	0.309605	21.9446	2.6879	0.00786489	0.883312	0.139609	-0.0694984	0.348716	22.0747	1.32891	0.187704	0.855884	0	0
hilic	pm2.5	lur	1	0	193.131	72.938	0.497424	0.142532	0.852316	18.4546	2.75982	0.0061898	0.882898	0.520085	0.0803091	0.959861	18.4604	2.33357	0.0207228	0.883312	0.504505	-0.134974	1.14398	18.4418	1.57033	0.120336	0.855884	0	0
hilic	pm2.5	lur	1	0	329.141	79.2	0.922498	0.260572	1.58442	17.8483	2.74415	0.00648447	0.882898	0.857382	0.081503	1.63326	17.7603	2.18051	0.0305171	0.883312	1.16438	-0.183419	2.51218	18.042	1.71957	0.0894257	0.855884	0	0
hilic	pm2.5	lur	1	0	131.056	99.53	0.451399	0.125513	0.777285	20.7213	2.72738	0.00681355	0.882898	0.486898	0.0807226	0.893072	20.7124	2.36539	0.0190751	0.883312	0.290883	-0.281586	0.863352	20.7409	1.01138	0.31492	0.895002	0	0
hilic	pm2.5	lur	1	0	154.069	40.589	-0.607587	-1.04961	-0.165565	21.2058	-2.70655	0.00724359	0.882898	-0.732316	-1.28576	-0.17887	21.2097	-2.61097	0.00979	0.883312	-0.268516	-1.03794	0.500906	21.1971	-0.694633	0.489323	0.920114	0	0
hilic	pm2.5	lur	1	0	131.534	272.337	0.104815	0.0280119	0.181617	24.5168	2.68718	0.00766514	0.882898	0.0541751	-0.0184225	0.126773	24.5334	1.4725	0.142632	0.916187	0.154531	-0.0425418	0.351604	24.4803	1.56077	0.122574	0.855884	0	0
hilic	pm2.5	lur	1	0	106.951	65.975	0.0943227	0.0243768	0.164269	24.1738	2.65525	0.00840857	0.882898	0.0907938	0.0075433	0.174044	24.1578	2.15203	0.0327275	0.883312	0.119196	-0.0287815	0.267173	24.2091	1.6033	0.112858	0.855884	0	0
hilic	pm2.5	lur	1	0	204.134	104.712	0.818556	0.210799	1.42631	20.0673	2.65197	0.00848838	0.882898	0.863665	0.178016	1.54931	20.2077	2.48554	0.0138476	0.883312	0.871112	-0.428236	2.17046	19.7582	1.33444	0.185893	0.855884	0	0
hilic	pm2.5	lur	1	0	181.988	22.417	0.160496	0.0404982	0.280493	22.052	2.63355	0.00895006	0.882898	0.214342	0.0692744	0.359409	22.0959	2.91551	0.00400256	0.808299	0.0464355	-0.185141	0.278012	21.9555	0.399122	0.69088	0.944899	0	0
hilic	pm2.5	lur	1	0	1152.25	67.801	0.298996	0.0731858	0.524806	21.3677	2.60719	0.00965005	0.882898	0.296448	-0.0141759	0.607071	21.3305	1.88318	0.0612891	0.883312	0.265684	0.0107233	0.520646	21.4499	2.07416	0.0413211	0.855884	0	0
hilic	pm2.5	lur	1	0	354.336	24.176	0.199421	0.0481419	0.3507	18.7291	2.59563	0.00997222	0.882898	0.197445	0.00138799	0.393501	18.7344	1.9872	0.0484169	0.883312	0.209596	-0.0371535	0.456345	18.7173	1.69074	0.0948279	0.855884	0	0
hilic	pm2.5	lur	1	0	276.18	37.737	0.372702	0.0881144	0.657289	19.8354	2.57868	0.0104621	0.882898	0.263874	-0.0813111	0.609059	19.7953	1.50842	0.1332	0.904786	0.557325	0.0192554	1.09539	19.9237	2.06168	0.0425267	0.855884	0	0
hilic	pm2.5	lur	1	0	171.978	266.6	0.144987	0.0334038	0.256571	20.7193	2.55847	0.0110739	0.882898	0.0749563	-0.0379233	0.187836	20.7713	1.3103	0.191764	0.952101	0.335019	0.060068	0.60997	20.6047	2.42529	0.017577	0.855884	0	0
hilic	pm2.5	lur	1	0	272.258	29.024	-0.178717	-0.316364	-0.0410697	19.2374	-2.55652	0.0111348	0.882898	-0.221425	-0.400751	-0.0420977	19.2117	-2.43646	0.0158057	0.883312	-0.112397	-0.330196	0.105403	19.2941	-1.02718	0.30747	0.895002	0	0
hilic	pm2.5	lur	1	0	129.091	27.502	-0.196812	-0.34973	-0.0438944	19.5146	-2.53422	0.0118504	0.882898	-0.240133	-0.432343	-0.0479233	19.563	-2.46521	0.0146307	0.883312	-0.102473	-0.373516	0.168569	19.4078	-0.75253	0.453968	0.910009	0	0
hilic	pm2.5	lur	1	0	270.977	75.986	0.21304	0.0463767	0.379703	23.575	2.51694	0.0124332	0.882898	0.144572	-0.0470819	0.336226	23.5221	1.48849	0.138373	0.915223	0.320623	0.00090061	0.640346	23.6916	1.99605	0.0493736	0.855884	0	0
hilic	pm2.5	lur	1	0	178.991	291.802	0.27032	0.0584601	0.48218	20.8819	2.51235	0.012592	0.882898	0.262326	0.0356874	0.488964	20.9104	2.28394	0.0235427	0.883312	0.428791	-0.0568526	0.914434	20.8193	1.75743	0.0827178	0.855884	0	0
hilic	pm2.5	lur	1	0	256.235	277.738	-0.334659	-0.597791	-0.0715256	20.5479	-2.50425	0.012877	0.882898	-0.2627	-0.58318	0.0577806	20.596	-1.61747	0.107528	0.891976	-0.512413	-0.998311	-0.0265144	20.4421	-2.09906	0.0390047	0.855884	0	0
hilic	pm2.5	lur	1	0	138.98	269.049	0.124498	0.0266034	0.222392	21.1868	2.50412	0.0128817	0.882898	0.0552277	-0.0381361	0.148592	21.2318	1.16723	0.244662	0.961983	0.248715	-0.002569	0.499999	21.0877	1.9701	0.052331	0.855884	0	0
hilic	pm2.5	lur	1	0	167.986	19.85	0.171439	0.0361323	0.306745	17.7764	2.49483	0.0132155	0.882898	0.209111	0.0408351	0.377387	17.8128	2.45207	0.0151577	0.883312	0.0151995	-0.221365	0.251764	17.6961	0.127888	0.898563	0.992091	0	0
hilic	pm2.5	lur	1	0	90.977	69.239	0.0687496	0.0137118	0.123787	29.9901	2.45958	0.0145541	0.882898	0.061335	-0.0054132	0.128083	29.9938	1.8132	0.0714662	0.883312	0.068979	-0.0498722	0.18783	29.9819	1.15522	0.251483	0.881327	0	0
hilic	pm2.5	lur	1	0	313.237	34.141	-0.304555	-0.549572	-0.0595386	20.1217	-2.44749	0.0150398	0.882898	-0.305995	-0.610938	-0.0010511	20.3119	-1.98003	0.0492238	0.883312	-0.23254	-0.658665	0.193586	19.7028	-1.0862	0.280693	0.895002	0	0
hilic	pm2.5	lur	1	0	248.649	36.087	0.274902	0.053536	0.496268	18.0329	2.44522	0.0151327	0.882898	0.356518	0.0898794	0.623157	18.0309	2.63837	0.00906031	0.883312	0.115588	-0.305079	0.536256	18.0374	0.546922	0.585974	0.927631	0	0
hilic	pm2.5	lur	1	0	268.009	63.663	-0.222005	-0.400913	-0.0430974	22.1818	-2.44335	0.0152097	0.882898	-0.162694	-0.362487	0.0370989	22.2824	-1.60683	0.109845	0.891976	-0.296797	-0.65804	0.0644451	21.9602	-1.63535	0.105953	0.855884	0	0
hilic	pm2.5	lur	1	0	100.51	285.217	0.153953	0.0292007	0.278704	23.6102	2.42991	0.015772	0.882898	0.00538191	-0.0967153	0.107479	23.6421	0.104016	0.917272	0.990901	0.340967	0.0232888	0.658645	23.5399	2.13636	0.0357448	0.855884	0	0
hilic	pm2.5	lur	1	0	260.074	124.487	0.590307	0.111033	1.06958	15.6198	2.42519	0.0159743	0.882898	0.38153	-0.191616	0.954676	15.5171	1.31353	0.190675	0.952101	1.21267	0.287442	2.13789	15.8462	2.60882	0.010862	0.855884	0	0
hilic	pm2.5	lur	1	0	170.154	28.462	0.318958	0.0571033	0.580812	18.8741	2.39841	0.0171633	0.882898	0.318821	0.00734258	0.6303	18.8492	2.01975	0.0448927	0.883312	0.301833	-0.217592	0.821258	18.9288	1.15663	0.250909	0.881327	0	0
hilic	pm2.5	lur	1	0	158.096	246.528	-0.223844	-0.407835	-0.0398519	19.2294	-2.39551	0.0172969	0.882898	-0.141283	-0.367636	0.0850703	19.2244	-1.23163	0.219693	0.961983	-0.419315	-0.745051	-0.0935794	19.2404	-2.56227	0.0122994	0.855884	0	0
hilic	pm2.5	lur	1	0	111.968	292.991	0.207151	0.0364647	0.377837	21.8115	2.38968	0.0175677	0.882898	0.0917702	-0.11209	0.295631	21.8423	0.888274	0.375579	0.961983	0.392548	0.0623188	0.722778	21.7436	2.36607	0.0204282	0.855884	0	0
hilic	pm2.5	lur	1	0	227.955	83.135	0.0839151	0.014769	0.153061	25.7804	2.38959	0.0175719	0.882898	0.100171	0.0188522	0.18149	25.7838	2.43069	0.0160511	0.883312	0.0280566	-0.121568	0.177681	25.7728	0.373234	0.709974	0.948018	0	0
hilic	pm2.5	lur	1	0	363.127	65.886	-0.938652	-1.71307	-0.164235	18.6575	-2.38661	0.017712	0.882898	-0.884479	-1.84971	0.0807515	18.7595	-1.80815	0.0722524	0.883312	-0.897954	-2.26086	0.464948	18.4329	-1.31141	0.193516	0.855884	0	0
hilic	pm2.5	lur	1	0	626.843	83.024	0.123032	0.0211984	0.224865	23.7329	2.37891	0.018078	0.882898	0.134314	0.00268992	0.265939	23.7613	2.01356	0.0455456	0.883312	0.106888	-0.0633162	0.277092	23.6702	1.25	0.21499	0.855884	0	0
hilic	pm2.5	lur	1	0	97.101	24.328	0.132656	0.0227265	0.242586	18.4388	2.37609	0.0182135	0.882898	0.139541	0.00963846	0.269444	18.4514	2.11964	0.0354072	0.883312	0.142633	-0.0840523	0.369318	18.4109	1.25241	0.214115	0.855884	0	0
hilic	pm2.5	lur	1	0	279.232	35.517	-0.244088	-0.446887	-0.04129	23.441	-2.36992	0.0185139	0.882898	-0.220592	-0.481308	0.0401245	23.4778	-1.66955	0.0967468	0.883312	-0.241162	-0.570319	0.0879957	23.3601	-1.45833	0.148714	0.855884	0	0
hilic	pm2.5	lur	1	0	162.132	101.515	0.788909	0.131478	1.44634	20.416	2.3628	0.0188655	0.882898	0.633822	-0.145952	1.41359	20.5138	1.6039	0.11049	0.891976	1.1239	-0.162647	2.41046	20.2006	1.73881	0.085963	0.855884	0	0
hilic	pm2.5	lur	1	0	178.028	102.353	-0.273808	-0.502192	-0.0454251	19.8142	-2.36066	0.0189725	0.882898	-0.318181	-0.579499	-0.0568626	19.9084	-2.4026	0.0172953	0.883312	-0.12581	-0.601604	0.349984	19.6066	-0.526317	0.600142	0.92951	0	0
hilic	pm2.5	lur	1	0	247.028	75.129	0.412856	0.0681931	0.757519	19.2251	2.3586	0.0190757	0.882898	0.372535	-0.0368979	0.781968	19.2661	1.79541	0.0742668	0.883312	0.449433	-0.231267	1.13013	19.1348	1.31419	0.192584	0.855884	0	0
hilic	pm2.5	lur	1	0	197.041	89.659	0.182082	0.0299208	0.334244	22.9776	2.35621	0.0191965	0.882898	0.192065	0.0136816	0.370449	22.9504	2.12457	0.0349871	0.883312	0.136811	-0.177414	0.451036	23.0376	0.866624	0.388772	0.895002	0	0
hilic	pm2.5	lur	1	0	141.091	27.307	-0.196572	-0.361621	-0.0315229	21.093	-2.34509	0.0197662	0.882898	-0.188945	-0.411741	0.0338517	21.1021	-1.67342	0.095982	0.883312	-0.201188	-0.414431	0.0120546	21.0729	-1.87793	0.0640808	0.855884	0	0
hilic	pm2.5	lur	1	0	150.066	263.913	0.435045	0.069723	0.800366	19.8717	2.34482	0.0197802	0.882898	0.48558	0.0422491	0.928911	19.8424	2.16128	0.0319948	0.883312	0.337502	-0.354812	1.02982	19.936	0.970339	0.334839	0.895002	0	0
hilic	pm2.5	lur	1	0	181.978	285.561	0.127764	0.0202082	0.235319	21.5571	2.33898	0.0200858	0.882898	0.180229	0.0576966	0.302761	21.5766	2.90237	0.00416649	0.808299	0.0120646	-0.223528	0.247658	21.514	0.10193	0.919071	0.992091	0	0
hilic	pm2.5	lur	1	0	160.968	84.062	0.100963	0.0156745	0.186251	21.8006	2.3309	0.0205149	0.882898	0.0964024	-0.0110143	0.203819	21.8254	1.7709	0.0782699	0.883312	0.11792	-0.0380933	0.273933	21.7458	1.50444	0.136454	0.855884	0	0
hilic	pm2.5	lur	1	0	460.873	67.599	0.425366	0.0645645	0.786168	21.2488	2.32138	0.0210311	0.882898	0.370695	-0.0799483	0.821339	21.2178	1.62316	0.106305	0.891976	0.595877	-0.0398182	1.23157	21.3171	1.86577	0.065785	0.855884	0	0
hilic	pm2.5	lur	1	0	389.257	45.275	0.912487	0.136352	1.68862	17.6555	2.31494	0.0213862	0.882898	1.45282	0.509389	2.39625	17.9481	3.03864	0.00273034	0.808299	-0.327971	-1.75035	1.0944	17.0113	-0.458956	0.647526	0.937675	0	0
hilic	pm2.5	lur	1	0	522.736	66.751	0.44179	0.0659077	0.817673	22.488	2.31427	0.0214234	0.882898	0.263236	-0.169797	0.69627	22.548	1.19951	0.231908	0.961983	0.774634	0.101482	1.44779	22.356	2.29052	0.0246578	0.855884	0	0
hilic	pm2.5	lur	1	0	182.985	294.934	0.297524	0.0442579	0.55079	25.6324	2.31311	0.0214885	0.882898	0.324983	0.01071	0.639256	25.5733	2.04048	0.0427636	0.883312	0.261882	-0.195519	0.719282	25.7625	1.13962	0.257889	0.883262	0	0
hilic	pm2.5	lur	1	0	244.154	37.556	-0.306785	-0.568619	-0.0449514	20.9611	-2.30706	0.0218283	0.882898	-0.495743	-0.793917	-0.19757	21.0377	-3.2807	0.00124349	0.562886	0.0637364	-0.462539	0.590012	20.7924	0.24106	0.810133	0.976619	0	0
hilic	pm2.5	lur	1	0	638.652	67.081	0.18083	0.0262541	0.335405	23.5192	2.30346	0.0220334	0.882898	0.273325	0.0788061	0.467845	23.4966	2.77265	0.00614547	0.883312	-0.0040825	-0.272991	0.264826	23.569	-0.0302186	0.975969	0.998705	0	0
hilic	pm2.5	lur	1	0	299.258	32.883	-0.224047	-0.415635	-0.0324586	21.7906	-2.30261	0.0220815	0.882898	-0.205898	-0.448692	0.0368963	21.8975	-1.67337	0.0959917	0.883312	-0.271941	-0.598044	0.0541618	21.5551	-1.65986	0.100907	0.855884	0	0
hilic	pm2.5	lur	1	0	271.154	24.386	-0.29309	-0.543952	-0.0422277	17.9466	-2.30047	0.0222045	0.882898	-0.424485	-0.738606	-0.110364	17.9648	-2.66651	0.00836256	0.883312	-0.012289	-0.431571	0.406993	17.9067	-0.058339	0.953626	0.996502	0	0
hilic	pm2.5	lur	1	0	117.091	273.458	0.211673	0.0298166	0.393529	20.0485	2.29186	0.0227042	0.882898	0.164753	-0.067512	0.397018	20.0602	1.39968	0.163331	0.92383	0.366557	0.0658986	0.667216	20.0226	2.42671	0.0175133	0.855884	0	0
hilic	pm2.5	lur	1	0	354.248	26.255	-0.191018	-0.356713	-0.0253221	18.9722	-2.26994	0.024021	0.882898	-0.182312	-0.394427	0.0298019	19.0129	-1.69599	0.0916158	0.883312	-0.191898	-0.468921	0.0851248	18.8824	-1.37881	0.171843	0.855884	0	0
hilic	pm2.5	lur	1	0	190.05	30.049	0.257952	0.034007	0.481897	19.2827	2.26803	0.0241386	0.882898	0.331201	0.0378419	0.62456	19.353	2.22777	0.0271348	0.883312	0.0637204	-0.274793	0.402234	19.1279	0.374674	0.708907	0.947776	0	0
hilic	pm2.5	lur	1	0	431.352	36.653	-0.590583	-1.10392	-0.07725	15.8006	-2.26534	0.0243056	0.882898	-0.377551	-1.02713	0.272028	15.9472	-1.14689	0.25295	0.961983	-1.07795	-1.91068	-0.245215	15.4776	-2.57657	0.0118406	0.855884	0	0
hilic	pm2.5	lur	1	0	90.961	75.13	0.10621	0.0138406	0.198579	22.0943	2.26406	0.024385	0.882898	0.102614	-0.0118429	0.21707	22.1348	1.76906	0.0785776	0.883312	0.0959995	-0.0760412	0.26804	22.0049	1.11068	0.270076	0.890211	0	0
hilic	pm2.5	lur	1	0	111.519	264.644	0.123035	0.015458	0.230611	23.7213	2.25196	0.0251501	0.882898	0.058346	-0.0311872	0.147879	23.773	1.28589	0.200132	0.957234	0.22158	-0.0805711	0.523732	23.6074	1.45968	0.148343	0.855884	0	0
hilic	pm2.5	lur	1	0	150.091	30.667	0.185737	0.0220206	0.349453	19.4263	2.23387	0.0263327	0.882898	0.222678	0.040663	0.404693	19.4444	2.41406	0.0167779	0.883312	0.0697257	-0.290859	0.430311	19.3864	0.384889	0.701354	0.946152	0	0
hilic	pm2.5	lur	1	0	261.043	87.544	0.260834	0.0299492	0.491719	22.2509	2.22444	0.0269681	0.882898	0.183022	-0.0894159	0.455459	22.2359	1.3256	0.186651	0.952101	0.452132	-0.0154921	0.919756	22.2841	1.9245	0.0578915	0.855884	0	0
hilic	pm2.5	lur	1	0	167.68	97.84	-0.105761	-0.199647	-0.0118756	20.3504	-2.21809	0.0274034	0.882898	-0.102612	-0.215756	0.0105324	20.3842	-1.78955	0.075208	0.883312	-0.166114	-0.350018	0.0177904	20.276	-1.79789	0.0760136	0.855884	0	0
hilic	pm2.5	lur	1	0	114.017	272.151	0.157575	0.0176444	0.297506	23.1677	2.21731	0.0274573	0.882898	0.0549112	-0.112805	0.222627	23.2072	0.646049	0.519071	0.961983	0.3797	0.107745	0.651654	23.0807	2.77904	0.00680997	0.855884	0	0
hilic	pm2.5	lur	1	0	139.05	44.556	0.25293	0.0281679	0.477693	22.2972	2.21579	0.0275624	0.882898	0.208231	-0.0495007	0.465962	22.2226	1.59425	0.112635	0.891976	0.31931	-0.156825	0.795445	22.4614	1.33485	0.185758	0.855884	0	0
hilic	pm2.5	lur	1	0	298.246	31.005	-0.226747	-0.430068	-0.0234271	19.3222	-2.1959	0.0289724	0.882898	-0.163602	-0.429644	0.102441	19.4151	-1.21343	0.226556	0.961983	-0.342821	-0.651484	-0.0341579	19.1176	-2.21072	0.0299474	0.855884	0	0
hilic	pm2.5	lur	1	0	300.29	33.247	-0.229067	-0.434663	-0.0234712	22.2578	-2.19381	0.0291241	0.882898	-0.153226	-0.3925	0.0860485	22.4646	-1.26361	0.208003	0.961983	-0.30817	-0.691055	0.0747143	21.8024	-1.60204	0.113138	0.855884	0	0
hilic	pm2.5	lur	1	0	143.981	269.865	0.135764	0.0138537	0.257674	22.515	2.19278	0.0291992	0.882898	0.0595234	-0.0264202	0.145467	22.5831	1.36663	0.173445	0.940505	0.267381	-0.0950776	0.62984	22.3649	1.46833	0.145986	0.855884	0	0
hilic	pm2.5	lur	1	0	526.683	65.768	0.0763227	0.00736841	0.145277	23.1573	2.17943	0.0301868	0.882898	0.0441489	-0.0344614	0.122759	23.1427	1.1082	0.269254	0.961983	0.176573	0.0270322	0.326114	23.1895	2.35026	0.021256	0.855884	0	0
hilic	pm2.5	lur	1	0	282.91	296.585	0.325931	0.0309137	0.620948	19.1176	2.17535	0.0304946	0.882898	0.207414	-0.146119	0.560948	19.179	1.15767	0.248531	0.961983	0.567603	0.00607068	1.12914	18.9825	2.01196	0.0476322	0.855884	0	0
hilic	pm2.5	lur	1	0	220.067	99.688	0.166174	0.0155077	0.316841	23.6249	2.17169	0.0307728	0.882898	0.168946	-0.030292	0.368184	23.6071	1.67322	0.0960205	0.883312	0.198336	-0.0252818	0.421954	23.6641	1.76541	0.0813586	0.855884	0	0
hilic	pm2.5	lur	1	0	370.279	38.282	-0.288863	-0.551587	-0.0261398	20.4125	-2.16493	0.0312923	0.882898	-0.169593	-0.425387	0.0862017	20.4734	-1.30826	0.192453	0.952101	-0.457224	-1.06345	0.149007	20.2785	-1.50121	0.137287	0.855884	0	0
hilic	pm2.5	lur	1	0	103.054	58.935	-0.087632	-0.167701	-0.0075631	26.8599	-2.15501	0.0320685	0.882898	-0.0719002	-0.16367	0.0198697	26.8959	-1.546	0.123862	0.891976	-0.110928	-0.279542	0.0576867	26.7806	-1.30947	0.19417	0.855884	0	0
hilic	pm2.5	lur	1	0	633.727	44.358	-0.667757	-1.27819	-0.0573247	15.6986	-2.15393	0.0321541	0.882898	-0.847096	-1.6645	-0.0296912	15.4019	-2.04491	0.0423199	0.883312	-0.250247	-1.03207	0.53158	16.352	-0.637102	0.5259	0.920494	0	0
hilic	pm2.5	lur	1	0	224.186	28.706	0.509675	0.0405135	0.978836	16.8611	2.13906	0.0333521	0.882898	0.628855	0.102263	1.15545	16.9534	2.35643	0.0195271	0.883312	0.239382	-0.777958	1.25672	16.658	0.468356	0.640819	0.937675	0	0
hilic	pm2.5	lur	1	0	203.107	279.112	0.283298	0.0214323	0.545163	20.8253	2.13018	0.0340851	0.882898	0.267234	-0.0574084	0.591876	20.871	1.62429	0.106063	0.891976	0.171617	-0.292367	0.635602	20.7246	0.73622	0.463777	0.911732	0	0
hilic	pm2.5	lur	1	0	338.984	87.942	-0.222062	-0.427413	-0.0167102	20.9402	-2.12925	0.0341625	0.882898	-0.0550895	-0.276752	0.166573	20.9395	-0.490404	0.624445	0.969915	-0.557297	-1.00622	-0.10837	20.9418	-2.47093	0.0156282	0.855884	0	0
hilic	pm2.5	lur	1	0	112.018	270.962	0.106929	0.00799334	0.205864	27.194	2.12811	0.034258	0.882898	0.0445733	-0.0331255	0.122272	27.2484	1.13198	0.259149	0.961983	0.18911	-0.0947822	0.473001	27.0741	1.3259	0.188693	0.855884	0	0
hilic	pm2.5	lur	1	0	91.505	267.9	0.126162	0.00937501	0.242948	23.1035	2.12709	0.0343436	0.882898	0.105994	-0.0152686	0.227256	23.1188	1.72478	0.0862846	0.883312	0.174417	-0.108768	0.457603	23.0696	1.22594	0.223863	0.863414	0	0
hilic	pm2.5	lur	1	0	277.06	75	0.215463	0.0158577	0.415069	25.475	2.12545	0.0344808	0.882898	0.235453	-0.0135569	0.484463	25.4803	1.8658	0.0636961	0.883312	0.176067	-0.180597	0.53273	25.4634	0.982583	0.328812	0.895002	0	0
hilic	pm2.5	lur	1	0	238.092	127.057	0.317288	0.0227569	0.611819	20.381	2.12116	0.0348438	0.882898	0.321684	-0.0393698	0.682738	20.3917	1.75807	0.0804357	0.883312	0.390065	-0.152197	0.932326	20.3575	1.43178	0.15615	0.855884	0	0
hilic	pm2.5	lur	1	0	108.949	66.035	0.279178	0.0199432	0.538413	19.7205	2.1205	0.0348997	0.882898	0.320264	-0.010167	0.650694	19.7049	1.91252	0.0573977	0.883312	0.240688	-0.190949	0.672325	19.7548	1.10991	0.270406	0.890211	0	0
hilic	pm2.5	lur	1	0	448.305	40.935	0.69655	0.0453506	1.34775	20.1206	2.10615	0.0361389	0.882898	0.730574	-0.0442011	1.50535	20.2946	1.86066	0.0644236	0.883312	0.893511	-0.351269	2.13829	19.7373	1.42875	0.157016	0.855884	0	0
hilic	pm2.5	lur	1	0	225.148	29.854	-0.155577	-0.301075	-0.010079	19.8049	-2.10542	0.0362027	0.882898	-0.131789	-0.319859	0.0562816	19.8101	-1.38273	0.168462	0.929965	-0.224701	-0.463778	0.0143764	19.7935	-1.87075	0.0650816	0.855884	0	0
hilic	pm2.5	lur	1	0	269.011	89.496	-0.325483	-0.630079	-0.0208856	20.1543	-2.10404	0.0363246	0.882898	-0.197962	-0.474516	0.0785933	20.3781	-1.41246	0.15954	0.92383	-0.664759	-1.45969	0.13017	19.6614	-1.66451	0.0999719	0.855884	0	0
hilic	pm2.5	lur	1	0	280.235	34.022	-0.251473	-0.486937	-0.0160094	20.7698	-2.1029	0.0364248	0.882898	-0.181465	-0.475765	0.112835	20.8516	-1.21669	0.225314	0.961983	-0.325387	-0.735791	0.0850172	20.5896	-1.57811	0.118535	0.855884	0	0
hilic	pm2.5	lur	1	0	193.163	45.752	-0.647589	-1.25423	-0.0409434	19.0843	-2.10192	0.0365116	0.882898	-0.924233	-1.66258	-0.185884	19.0497	-2.47	0.0144427	0.883312	-0.0416339	-1.161	1.07774	19.1606	-0.0740327	0.941172	0.992091	0	0
hilic	pm2.5	lur	1	0	223.108	60.097	0.497218	0.0294181	0.965018	21.1269	2.09285	0.0373209	0.882898	0.759693	0.21239	1.307	21.2066	2.73898	0.00678305	0.883312	-0.23164	-1.10409	0.640806	20.9515	-0.528476	0.59865	0.92951	0	0
hilic	pm2.5	lur	1	0	236.972	99.955	0.356954	0.0202768	0.693631	21.0395	2.08761	0.0377953	0.882898	0.340607	-0.079886	0.761101	21.1152	1.59835	0.111718	0.891976	0.484787	-0.0983249	1.0679	20.8726	1.65481	0.101929	0.855884	0	0
hilic	pm2.5	lur	1	0	174.063	101.915	0.537305	0.0281115	1.0465	18.2848	2.07773	0.0387044	0.882898	0.675422	0.0343545	1.31649	18.3247	2.07898	0.0390374	0.883312	0.141356	-0.724673	1.00738	18.197	0.324887	0.746125	0.961695	0	0
hilic	pm2.5	lur	1	0	1148.25	67.836	-0.656642	-1.27989	-0.0333906	18.7988	-2.07451	0.0390042	0.882898	-0.614337	-1.34469	0.116021	18.7211	-1.65977	0.0987013	0.883312	-0.748907	-1.96975	0.471933	18.9699	-1.22101	0.225713	0.863414	0	0
hilic	pm2.5	lur	1	0	295.227	36.81	-0.228005	-0.444494	-0.0115149	21.8567	-2.07375	0.0390753	0.882898	-0.253254	-0.543465	0.0369568	22.0717	-1.72195	0.0867963	0.883312	-0.160485	-0.448925	0.127955	21.3834	-1.10746	0.271454	0.891499	0	0
hilic	pm2.5	lur	1	0	336.326	36.987	-0.782486	-1.52595	-0.0390257	16.0211	-2.07238	0.0392041	0.882898	-0.707673	-1.6035	0.188153	16.3924	-1.55879	0.120803	0.891976	-0.916981	-2.28297	0.449007	15.2031	-1.33618	0.185327	0.855884	0	0
hilic	pm2.5	lur	1	0	104.058	59.031	-0.144392	-0.28185	-0.0069331	23.0055	-2.06834	0.0395858	0.882898	-0.145683	-0.318673	0.0273061	22.9719	-1.66176	0.0983015	0.883312	-0.139826	-0.376496	0.0968444	23.0794	-1.17596	0.24314	0.877873	0	0
hilic	pm2.5	lur	1	0	138.049	61.914	0.119198	0.00569021	0.232706	24.9875	2.06773	0.0396431	0.882898	0.147305	0.00697662	0.287634	24.9084	2.07133	0.0397542	0.883312	0.0308739	-0.173883	0.235631	25.1616	0.300126	0.76487	0.965399	0	0
hilic	pm2.5	lur	1	0	225.047	74.181	0.266627	0.0123406	0.520914	21.7212	2.06458	0.0399429	0.882898	0.243263	-0.0798752	0.566401	21.72	1.48548	0.139167	0.915223	0.317122	-0.110372	0.744616	21.7238	1.47655	0.143772	0.855884	0	0
hilic	pm2.5	lur	1	0	113.017	271.626	0.104686	0.00476039	0.204611	24.4163	2.06283	0.0401107	0.882898	0.0483726	-0.0660195	0.162765	24.4486	0.834414	0.405154	0.961983	0.181178	-0.0299257	0.392282	24.3452	1.70828	0.0915098	0.855884	0	0
hilic	pm2.5	lur	1	0	229.143	137.67	-0.240506	-0.470317	-0.0106938	20.5509	-2.06065	0.04032	0.882898	-0.294766	-0.58666	-0.0028719	20.5573	-1.99265	0.0478115	0.883312	-0.0899089	-0.478854	0.299036	20.5367	-0.460113	0.646699	0.937675	0	0
hilic	pm2.5	lur	1	0	361.321	36.442	0.23126	0.0102457	0.452274	18.784	2.0603	0.0403531	0.882898	0.318205	0.046969	0.589441	18.8722	2.31493	0.0217452	0.883312	0.118577	-0.277647	0.514802	18.5897	0.595677	0.553093	0.920494	0	0
hilic	pm2.5	lur	1	0	135.003	69.125	0.159005	0.0067426	0.311267	25.5652	2.05622	0.0407482	0.882898	0.123436	-0.0645645	0.311436	25.4613	1.29557	0.196783	0.957234	0.195829	-0.0688318	0.460489	25.794	1.47278	0.144783	0.855884	0	0
hilic	pm2.5	lur	1	0	153.066	49.332	-0.241334	-0.472567	-0.0101006	25.8618	-2.05503	0.0408634	0.882898	-0.274324	-0.559322	0.010674	25.8981	-1.89933	0.0591207	0.883312	-0.125758	-0.542704	0.291189	25.7818	-0.600351	0.549991	0.920494	0	0
hilic	pm2.5	lur	1	0	106.999	75.195	0.141588	0.00577939	0.277397	23.8961	2.05282	0.0410797	0.882898	0.157603	-0.0042099	0.319416	23.9029	1.92189	0.0561986	0.883312	0.112926	-0.159683	0.385534	23.8812	0.824523	0.412124	0.905711	0	0
hilic	pm2.5	lur	1	0	247.956	139.7	-0.350524	-0.686932	-0.014115	18.7153	-2.05164	0.0411948	0.882898	-0.509515	-0.949465	-0.0695652	18.6383	-2.28524	0.023465	0.883312	0.0440239	-0.438949	0.526997	18.8848	0.181433	0.856492	0.980706	0	0
hilic	pm2.5	lur	1	0	155.075	65.529	0.407028	0.0161245	0.797932	20.5677	2.05024	0.0413318	0.882898	0.500337	0.00783885	0.992836	20.5426	2.00464	0.0465006	0.883312	0.272142	-0.35531	0.899593	20.6228	0.863306	0.390582	0.895002	0	0
hilic	pm2.5	lur	1	0	269.065	132.151	-0.626655	-1.2293	-0.0240116	16.1641	-2.04748	0.0416046	0.882898	-1.26785	-1.97859	-0.557105	16.1779	-3.51992	0.00054678	0.562886	0.613394	-0.531926	1.75871	16.1336	1.06601	0.289664	0.895002	0	0
hilic	pm2.5	lur	1	0	156.877	68.521	0.266289	0.00983006	0.522747	20.4631	2.0445	0.0419001	0.882898	-0.0102527	-0.186869	0.166364	20.5151	-0.114547	0.908932	0.990901	0.918973	0.165372	1.67257	20.3486	2.42723	0.01749	0.855884	0	0
hilic	pm2.5	lur	1	0	154.084	72.381	-0.538977	-1.0586	-0.0193533	20.4714	-2.04236	0.042113	0.882898	-0.695165	-1.31573	-0.0746005	20.4391	-2.21044	0.0283351	0.883312	-0.126234	-1.13337	0.880903	20.5427	-0.249481	0.803636	0.9738	0	0
hilic	pm2.5	lur	1	0	161.096	168.743	-0.188765	-0.370971	-0.0065592	20.2761	-2.03991	0.0423587	0.882898	-0.101946	-0.324193	0.1203	20.2915	-0.905138	0.366602	0.961983	-0.407414	-0.748858	-0.0659688	20.2423	-2.37501	0.019973	0.855884	0	0
hilic	pm2.5	lur	1	0	492.73	65.208	0.647912	0.018094	1.27773	16.7405	2.02559	0.0438163	0.882898	0.473161	-0.259133	1.20545	16.6887	1.27497	0.203962	0.957234	1.22903	-0.0486175	2.50667	16.8544	1.9147	0.0591498	0.855884	0	0
hilic	pm2.5	lur	1	0	366.185	113.631	-0.254836	-0.502582	-0.0070911	20.1987	-2.02538	0.0438379	0.882898	-0.241785	-0.564435	0.0808648	20.1768	-1.47869	0.140972	0.915981	-0.233815	-0.619313	0.151683	20.2471	-1.20726	0.230934	0.866323	0	0
hilic	pm2.5	lur	1	0	592.673	65.686	0.116254	0.00318108	0.229326	22.3773	2.02442	0.0439376	0.882898	0.174507	0.0330674	0.315946	22.3526	2.43456	0.0158861	0.883312	0.0181196	-0.174269	0.210508	22.4318	0.187464	0.851777	0.980706	0	0
hilic	pm2.5	lur	1	0	161.128	100.935	0.417885	0.0113155	0.824455	25.5024	2.02383	0.0439991	0.882898	0.46654	-0.0197961	0.952875	25.5203	1.89291	0.0599744	0.883312	0.406629	-0.388968	1.20223	25.4628	1.01731	0.312109	0.895002	0	0
hilic	pm2.5	lur	1	0	185.989	21.799	0.0763924	0.00177988	0.151005	20.368	2.01599	0.0448172	0.882898	0.0865424	-0.0096786	0.182763	20.4005	1.77475	0.0776294	0.883312	0.0672742	-0.0652342	0.199783	20.2963	1.01054	0.315319	0.895002	0	0
hilic	pm2.5	lur	1	0	158.964	83.441	0.066728	0.00152562	0.13193	29.0503	2.0151	0.0449119	0.882898	0.0710722	-0.0079098	0.150054	29.0708	1.77562	0.0774857	0.883312	0.0253082	-0.106791	0.157408	29.0051	0.381339	0.703975	0.946397	0	0
hilic	pm2.5	lur	1	0	338.785	66.529	0.0581225	0.00126581	0.114979	24.3166	2.01286	0.0451482	0.882898	0.0321452	-0.0381024	0.102393	24.3089	0.902948	0.36776	0.961983	0.144859	0.031624	0.258093	24.3336	2.54633	0.0128296	0.855884	0	0
hilic	pm2.5	lur	1	0	259.028	90.976	-0.617962	-1.2241	-0.0118227	18.2737	-2.00743	0.0457268	0.882898	-0.596622	-1.26775	0.0745091	18.0921	-1.75416	0.0811045	0.883312	-0.48867	-1.83695	0.859614	18.6735	-0.721414	0.472784	0.919047	0	0
hilic	pm2.5	lur	1	0	344.956	69.034	0.342452	0.00632332	0.67858	21.7735	2.00607	0.0458731	0.882898	0.530879	0.0982795	0.963479	21.7211	2.42152	0.0164484	0.883312	0.00471459	-0.526657	0.536086	21.8889	0.0176602	0.985954	0.999158	0	0
hilic	pm2.5	lur	1	0	518.651	66.457	0.0939368	0.00154309	0.186331	23.0585	2.00191	0.0463213	0.882898	0.0718232	-0.0506334	0.19428	23.0346	1.15734	0.248668	0.961983	0.177569	0.037045	0.318094	23.1111	2.51517	0.0139265	0.855884	0	0
hilic	pm2.5	lur	1	0	385.277	37.328	-0.592638	-1.1757	-0.0095806	16.9439	-2.00138	0.0463788	0.882898	-0.682532	-1.38725	0.0221904	17.0261	-1.9111	0.0575811	0.883312	-0.0782714	-1.14672	0.990173	16.7631	-0.145815	0.884439	0.988127	0	0
hilic	pm2.5	lur	1	0	168.093	59.195	-0.122542	-0.243225	-0.0018604	23.3096	-1.99938	0.0465962	0.882898	-0.122957	-0.261702	0.0157873	23.367	-1.7487	0.082047	0.883312	-0.117666	-0.367332	0.131999	23.1831	-0.938088	0.351058	0.895002	0	0
hilic	pm2.5	lur	1	0	726.508	38.188	-0.464103	-0.921742	-0.0064632	18.3812	-1.99683	0.0468738	0.882898	-0.567819	-1.22106	0.08542	18.0522	-1.7152	0.0880287	0.883312	-0.163293	-0.475833	0.149246	19.1058	-1.03995	0.301534	0.895002	0	0
hilic	pm2.5	lur	1	0	534.713	61.486	0.115681	0.00145157	0.229911	23.0463	1.99405	0.0471795	0.882898	0.165593	0.0412646	0.289921	23.0086	2.62815	0.00932666	0.883312	0.0358666	-0.213754	0.285487	23.1294	0.285996	0.77563	0.965845	0	0
hilic	pm2.5	lur	1	0	405.3	38.078	0.319644	0.00374753	0.635541	20.2201	1.99238	0.0473626	0.882898	0.623282	0.200294	1.04627	19.8862	2.9076	0.00410053	0.808299	-0.207848	-0.565881	0.150185	20.9554	-1.15551	0.251366	0.881327	0	0
hilic	pm2.5	lur	1	0	718.619	65.491	0.539847	0.00542083	1.07427	19.7919	1.989	0.0477375	0.882898	0.15218	-0.447351	0.751712	19.6719	0.50087	0.617075	0.968534	1.26009	0.159416	2.36076	20.0561	2.27873	0.0253831	0.855884	0	0
hilic	pm2.5	lur	1	0	416.71	65.372	0.200678	0.00189744	0.399458	19.949	1.98782	0.0478684	0.882898	0.188842	-0.0680277	0.445711	19.8904	1.45065	0.148617	0.920753	0.26228	-0.0554436	0.580004	20.0779	1.64311	0.104335	0.855884	0	0
hilic	pm2.5	lur	1	0	575.503	36.311	-0.551433	-1.09813	-0.0047387	17.6466	-1.98609	0.0480611	0.882898	-0.535565	-1.21934	0.148206	17.7884	-1.54554	0.123973	0.891976	-0.41689	-1.3427	0.508921	17.3342	-0.896292	0.372819	0.895002	0	0
hilic	pm2.5	lur	1	0	191.122	92.924	-0.455075	-0.906468	-0.0036823	17.8787	-1.98509	0.0481735	0.882898	-0.516476	-1.04756	0.0146044	17.8879	-1.91897	0.0565704	0.883312	-0.329018	-1.21934	0.561307	17.8585	-0.735566	0.464173	0.911732	0	0
hilic	pm2.5	lur	1	0	194.975	275.172	0.235576	0.00088651	0.470265	21.3919	1.97646	0.0491471	0.882898	0.272638	-0.0391165	0.584393	21.3925	1.72565	0.0861273	0.883312	0.0888898	-0.235682	0.413461	21.3904	0.54512	0.587207	0.927631	0	0
hilic	pm2.5	lur	1	0	150.932	71.488	0.062184	0.00014243	0.124226	24.153	1.97354	0.0494802	0.882898	0.0761786	0.00128364	0.151074	24.1643	2.00705	0.0462406	0.883312	0.042153	-0.0892954	0.173601	24.1279	0.638298	0.525126	0.920494	0	0
hilic	pm2.5	lur	1	0	231.055	75.316	0.116434	0.0001784	0.23269	26.2766	1.97205	0.049652	0.882898	0.133827	-0.0116037	0.279257	26.288	1.81579	0.0710667	0.883312	0.0731733	-0.137386	0.283732	26.2513	0.691718	0.491142	0.920114	0	0
hilic	pm2.5	lur	1	0	670.689	65.248	0.420032	0.00061327	0.83945	17.5841	1.9719	0.0496684	0.882898	0.275259	-0.231692	0.78221	17.5508	1.0714	0.285423	0.961983	0.633217	-0.159131	1.42556	17.6576	1.5907	0.115672	0.855884	0	0
hilic	pm2.5	lur	1	0	250.044	128.23	-0.463016	-0.927144	0.00111138	17.1609	-1.96431	0.0505471	0.882898	-0.372304	-0.945804	0.201196	17.2679	-1.28098	0.201848	0.957234	-0.51711	-1.32231	0.288089	16.9251	-1.27829	0.204889	0.855884	0	0
hilic	pm2.5	lur	1	0	576.79	69.343	0.276316	-0.0006922	0.553325	20.8251	1.9641	0.0505711	0.882898	0.427596	0.0861586	0.769034	20.7766	2.47116	0.0143978	0.883312	0.0116743	-0.478422	0.501771	20.9318	0.047413	0.962304	0.998705	0	0
hilic	pm2.5	lur	1	0	426.357	38.185	-0.140355	-0.281495	0.00078403	26.0415	-1.95809	0.0512769	0.882898	-0.166989	-0.344789	0.0108119	26.0353	-1.85324	0.0654847	0.883312	-0.102826	-0.347909	0.142257	26.0551	-0.835103	0.406178	0.904707	0	0
hilic	pm2.5	lur	1	0	359.995	73.962	-0.822916	-1.65095	0.00511787	18.4234	-1.95685	0.0514225	0.882898	-1.01846	-2.01859	-0.0183286	18.5854	-2.00939	0.0459894	0.883312	-0.48858	-2.06941	1.09225	18.0666	-0.615178	0.540205	0.920494	0	0
hilic	pm2.5	lur	1	0	161.132	26.347	-0.226403	-0.454273	0.00146714	19.232	-1.95635	0.0514825	0.882898	-0.247398	-0.503115	0.00831816	19.263	-1.90904	0.0578473	0.883312	-0.220522	-0.722143	0.2811	19.1638	-0.875034	0.384207	0.895002	0	0
hilic	pm2.5	lur	1	0	132.509	58.66	-0.320316	-0.643044	0.00241147	20.8567	-1.95431	0.0517239	0.882898	-0.0532575	-0.449029	0.342514	20.9349	-0.265531	0.790905	0.986872	-0.962334	-1.52432	-0.400353	20.6844	-3.40843	0.00103093	0.855884	0	0
hilic	pm2.5	lur	1	0	167.986	265.593	0.113454	-0.0009551	0.227862	20.3802	1.95259	0.0519293	0.882898	0.0489805	-0.0623434	0.160304	20.4356	0.868186	0.386449	0.961983	0.211688	-0.0787485	0.502124	20.2582	1.45076	0.150805	0.855884	0	0
hilic	pm2.5	lur	1	0	109.101	286.815	-0.520412	-1.04552	0.00469397	19.8142	-1.95142	0.0520682	0.882898	-0.174952	-0.770118	0.420213	19.6846	-0.580043	0.562611	0.961983	-1.16487	-2.26799	-0.0617364	20.0996	-2.10184	0.0387531	0.855884	0	0
hilic	pm2.5	lur	1	0	156.072	65.587	0.14403	-0.001305	0.289365	27.1611	1.95134	0.0520776	0.882898	0.15571	-0.0218955	0.333316	27.1641	1.72997	0.08535	0.883312	0.10294	-0.171965	0.377846	27.1544	0.745336	0.45828	0.911684	0	0
hilic	pm2.5	lur	1	0	580.694	66.804	0.107679	-0.0014162	0.216773	23.5248	1.94346	0.0530267	0.882898	0.111529	-0.0012628	0.224321	23.5115	1.95114	0.0525927	0.883312	0.137185	-0.130299	0.40467	23.5541	1.02084	0.310444	0.895002	0	0
hilic	pm2.5	lur	1	0	582.555	66.486	-0.234589	-0.472271	0.00309222	19.9902	-1.94341	0.0530336	0.882898	-0.143851	-0.436469	0.148767	19.8948	-0.970042	0.333327	0.961983	-0.418418	-0.856578	0.0197409	20.2001	-1.90077	0.0609793	0.855884	0	0
hilic	pm2.5	lur	1	0	192.922	257.475	0.295457	-0.0041282	0.595042	19.2713	1.94189	0.0532179	0.882898	0.178783	-0.217525	0.575091	19.2389	0.890167	0.374564	0.961983	0.526194	0.106305	0.946084	19.3427	2.49437	0.0147046	0.855884	0	0
hilic	pm2.5	lur	1	0	313.163	34.898	-0.637778	-1.28469	0.009131	19.2302	-1.94123	0.0532982	0.882898	-0.675825	-1.4589	0.107246	19.2257	-1.70299	0.0902968	0.883312	-0.45687	-1.6499	0.736162	19.2401	-0.762239	0.448187	0.905711	0	0
hilic	pm2.5	lur	1	0	670.562	67.3	-0.17607	-0.354872	0.00273191	22.2994	-1.93894	0.0535783	0.882898	-0.0876761	-0.293251	0.117899	22.3117	-0.841567	0.401147	0.961983	-0.428669	-0.801492	-0.0558463	22.2723	-2.2886	0.0247745	0.855884	0	0
hilic	pm2.5	lur	1	0	149.953	274.381	0.155325	-0.002786	0.313435	20.999	1.93433	0.0541452	0.882898	0.194491	0.00043579	0.388547	21.0361	1.97766	0.0494932	0.883312	0.0420801	-0.248874	0.333034	20.9174	0.287874	0.774197	0.965845	0	0
hilic	pm2.5	lur	1	0	632.455	38.689	-0.281793	-0.569731	0.0061438	18.8563	-1.92701	0.0550554	0.882898	-0.168951	-0.511412	0.173511	18.6783	-0.973478	0.331622	0.961983	-0.490789	-1.03745	0.0558719	19.2484	-1.78701	0.0777711	0.855884	0	0
hilic	pm2.5	lur	1	0	301.118	42.143	-0.663646	-1.34351	0.0162188	18.1629	-1.92205	0.0556795	0.882898	-0.260589	-1.06352	0.54234	18.3511	-0.640409	0.522721	0.961983	-1.41838	-2.74777	-0.0889949	17.7485	-2.12369	0.0368243	0.855884	0	0
hilic	pm2.5	lur	1	0	148.935	71.38	0.0510327	-0.0012655	0.103331	25.9569	1.92138	0.0557646	0.882898	0.069537	0.00191074	0.137163	25.9536	2.02898	0.0439331	0.883312	0.0179097	-0.0821187	0.117938	25.9643	0.356382	0.722505	0.953181	0	0
hilic	pm2.5	lur	1	0	402.346	37.279	-0.495398	-1.00449	0.0136972	18.0378	-1.91605	0.056443	0.882898	-0.31784	-0.942301	0.306621	18.1759	-1.00434	0.316563	0.961983	-0.713894	-1.59536	0.167575	17.7337	-1.61204	0.11094	0.855884	0	0
hilic	pm2.5	lur	1	0	177.075	53.413	0.601041	-0.0169809	1.21906	18.5185	1.91492	0.056587	0.882898	0.550665	-0.212533	1.31386	18.4382	1.42373	0.156255	0.92383	0.652315	-0.431066	1.7357	18.6953	1.19847	0.234317	0.869408	0	0
hilic	pm2.5	lur	1	0	504.789	69.827	-0.580397	-1.17762	0.0168303	18.7493	-1.91354	0.056765	0.882898	-0.601506	-1.33128	0.128267	18.7606	-1.62641	0.105612	0.891976	-0.675478	-1.75132	0.400367	18.7244	-1.24972	0.215092	0.855884	0	0
hilic	pm2.5	lur	1	0	131.534	21.958	0.114991	-0.0035741	0.233556	21.6986	1.90967	0.0572636	0.882898	0.13979	-0.0132631	0.292843	21.7321	1.80224	0.0731811	0.883312	0.0809704	-0.11606	0.278	21.6248	0.817983	0.415827	0.905711	0	0
hilic	pm2.5	lur	1	0	121.023	264.482	0.144593	-0.0047397	0.293926	21.0464	1.90653	0.0576713	0.882898	0.158036	-0.0061539	0.322227	21.1301	1.89927	0.0591279	0.883312	0.0844617	-0.248263	0.417186	20.8621	0.505272	0.614775	0.931593	0	0
hilic	pm2.5	lur	1	0	281.008	53.407	-0.240759	-0.489491	0.00797253	24.0673	-1.90591	0.0577518	0.882898	-0.250453	-0.573336	0.0724294	23.8817	-1.53059	0.127625	0.891976	-0.217962	-0.611645	0.17572	24.4761	-1.10201	0.273802	0.894904	0	0
hilic	pm2.5	lur	1	0	149.113	109.769	0.375754	-0.0126993	0.764207	24.6095	1.90465	0.057916	0.882898	0.401772	-0.0649005	0.868444	24.6354	1.69881	0.0910823	0.883312	0.301127	-0.415199	1.01745	24.5526	0.836737	0.405264	0.903692	0	0
hilic	pm2.5	lur	1	0	281.174	25.766	-0.271595	-0.55265	0.00946056	18.1035	-1.90274	0.0581658	0.882898	-0.357166	-0.663423	-0.0509087	18.1099	-2.30124	0.022524	0.883312	-0.0659815	-0.688139	0.556176	18.0894	-0.211092	0.833359	0.980706	0	0
hilic	pm2.5	lur	1	0	158.068	65.585	0.150138	-0.0054317	0.305708	22.4255	1.90028	0.0584903	0.882898	0.154368	-0.0365167	0.345253	22.4266	1.59575	0.112299	0.891976	0.138523	-0.14725	0.424297	22.4232	0.964831	0.337573	0.895002	0	0
hilic	pm2.5	lur	1	0	554.772	68.818	0.39402	-0.0152649	0.803306	17.3567	1.89559	0.059111	0.882898	0.260695	-0.222232	0.743622	17.3451	1.0652	0.288214	0.961983	0.635659	-0.182424	1.45374	17.3822	1.5466	0.125957	0.855884	0	0
hilic	pm2.5	lur	1	0	188.128	59.615	-0.195976	-0.399958	0.00800649	22.9225	-1.89174	0.0596243	0.882898	-0.272512	-0.523027	-0.0219969	22.9573	-2.1465	0.0331723	0.883312	-0.0783968	-0.44955	0.292756	22.8457	-0.420432	0.675311	0.944244	0	0
hilic	pm2.5	lur	1	0	179.107	34.834	-0.176698	-0.361053	0.00765747	20.4695	-1.88724	0.0602294	0.882898	-0.0318938	-0.25136	0.187572	20.4109	-0.286759	0.774626	0.986872	-0.423018	-0.777134	-0.0689014	20.5988	-2.37773	0.0198362	0.855884	0	0
hilic	pm2.5	lur	1	0	246.036	232.312	0.506958	-0.0244922	1.03841	17.2243	1.87828	0.061449	0.882898	0.269288	-0.339365	0.87794	17.2352	0.873022	0.383814	0.961983	1.00294	-0.109108	2.11499	17.2005	1.79515	0.0764529	0.855884	0	0
hilic	pm2.5	lur	1	0	399.314	39.104	-0.29416	-0.602657	0.014338	17.6708	-1.87751	0.0615549	0.882898	-0.237029	-0.556076	0.0820187	17.5271	-1.46597	0.144403	0.916187	-0.280987	-1.00006	0.438087	17.9873	-0.777792	0.439015	0.905711	0	0
hilic	pm2.5	lur	1	0	241.216	277.991	-0.529253	-1.08458	0.0260758	19.0275	-1.87657	0.0616845	0.882898	-0.34473	-1.01726	0.327797	18.9655	-1.01146	0.313155	0.961983	-1.09312	-2.09877	-0.0874687	19.1641	-2.16357	0.0335191	0.855884	0	0
hilic	pm2.5	lur	1	0	656.524	35.395	-0.512943	-1.0525	0.0266097	17.7871	-1.87192	0.062328	0.882898	-0.625702	-1.2692	0.017797	17.9154	-1.91866	0.0566099	0.883312	-0.308992	-1.35138	0.733399	17.5045	-0.59002	0.556861	0.920494	0	0
hilic	pm2.5	lur	1	0	148.143	113.311	0.311351	-0.016267	0.638968	20.2876	1.87126	0.0624195	0.882898	0.364544	-0.0311042	0.760192	20.2972	1.8181	0.0707107	0.883312	0.187574	-0.430548	0.805695	20.2666	0.604016	0.547563	0.920494	0	0
hilic	pm2.5	lur	1	0	140.991	269.782	0.123732	-0.00653	0.253993	22.1488	1.87032	0.0625505	0.882898	0.0659857	-0.0271276	0.159099	22.2168	1.39835	0.163728	0.92383	0.145072	-0.229106	0.51925	21.9988	0.771713	0.442586	0.905711	0	0
hilic	pm2.5	lur	1	0	111.117	26.07	-0.2904	-0.596367	0.0155661	18.6394	-1.86885	0.0627551	0.882898	-0.374571	-0.740982	-0.0081601	18.7114	-2.01718	0.0451629	0.883312	-0.0672538	-0.6427	0.508192	18.481	-0.232628	0.816652	0.98056	0	0
hilic	pm2.5	lur	1	0	208.069	74.748	0.129621	-0.0069635	0.266205	24.4865	1.86864	0.0627848	0.882898	0.131682	-0.0376902	0.301054	24.4976	1.53413	0.126753	0.891976	0.157487	-0.0921678	0.407142	24.462	1.25561	0.212958	0.855884	0	0
hilic	pm2.5	lur	1	0	209.073	75.124	0.12992	-0.0069962	0.266835	28.27	1.86841	0.0628166	0.882898	0.141106	-0.0280743	0.310286	28.2864	1.64579	0.101553	0.885563	0.122771	-0.131124	0.376666	28.2338	0.962481	0.338744	0.895002	0	0
hilic	pm2.5	lur	1	0	131.07	118.315	-0.279389	-0.573921	0.0151432	20.2931	-1.86779	0.0629037	0.882898	-0.324394	-0.682273	0.0334861	20.349	-1.7886	0.0753611	0.883312	-0.244823	-0.781076	0.29143	20.17	-0.908725	0.366259	0.895002	0	0
hilic	pm2.5	lur	1	0	223.154	38.344	-0.223715	-0.459728	0.0122976	19.8624	-1.86643	0.0630944	0.882898	-0.110948	-0.355123	0.133227	20.1206	-0.896595	0.371133	0.961983	-0.510086	-1.05273	0.0325614	19.2937	-1.87101	0.0650458	0.855884	0	0
hilic	pm2.5	lur	1	0	255.232	289.63	0.515804	-0.0287472	1.06036	22.117	1.86508	0.0632839	0.882898	0.433452	-0.223804	1.09071	22.0153	1.30132	0.194812	0.957234	0.806592	-0.229459	1.84264	22.3409	1.54961	0.125231	0.855884	0	0
hilic	pm2.5	lur	1	0	406.29	39.144	0.342452	-0.019433	0.704336	17.8007	1.86329	0.0635361	0.882898	0.608556	0.157756	1.05936	17.6186	2.66376	0.00842862	0.883312	-0.251328	-0.858364	0.355709	18.2017	-0.824092	0.412368	0.905711	0	0
hilic	pm2.5	lur	1	0	590.676	65.407	0.209477	-0.0122107	0.431164	20.5539	1.86057	0.063921	0.882898	0.213826	-0.0786408	0.506293	20.5285	1.44265	0.150856	0.920753	0.225363	-0.0987502	0.549475	20.6098	1.384	0.170256	0.855884	0	0
hilic	pm2.5	lur	1	0	514.875	62.95	0.220257	-0.0129549	0.453469	22.5619	1.85964	0.0640522	0.882898	-0.0106747	-0.255268	0.233919	22.4444	-0.0861174	0.931469	0.990901	0.684932	0.178337	1.19153	22.8205	2.69115	0.00868759	0.855884	0	0
hilic	pm2.5	lur	1	0	131.162	29.724	0.432466	-0.0265305	0.891463	17.4451	1.85521	0.0646847	0.882898	0.308453	-0.26942	0.886325	17.4087	1.05326	0.293635	0.961983	0.659621	-0.132586	1.45183	17.5253	1.65732	0.101421	0.855884	0	0
hilic	pm2.5	lur	1	0	204.138	30.718	0.436335	-0.0284373	0.901107	18.3827	1.84855	0.0656453	0.882898	0.584587	0.0718161	1.09736	18.2469	2.24959	0.0256863	0.883312	0.302156	-0.710321	1.31463	18.6818	0.594013	0.5542	0.920494	0	0
hilic	pm2.5	lur	1	0	325.982	69.952	0.359233	-0.0239802	0.742446	21.3914	1.84581	0.0660436	0.882898	0.644023	0.162407	1.12564	21.4043	2.63863	0.00905376	0.883312	-0.226956	-0.854896	0.400984	21.3629	-0.719404	0.474014	0.919047	0	0
hilic	pm2.5	lur	1	0	193.122	33.893	-0.160212	-0.331792	0.0113671	19.892	-1.83858	0.0671049	0.882898	-0.114377	-0.32201	0.0932554	19.9124	-1.08698	0.278498	0.961983	-0.249667	-0.577406	0.0780719	19.8469	-1.51629	0.133436	0.855884	0	0
hilic	pm2.5	lur	1	0	387.18	38.319	-0.593706	-1.22966	0.0422501	18.0993	-1.83821	0.0671589	0.882898	-0.316653	-1.00437	0.371068	18.648	-0.908551	0.364802	0.961983	-0.436048	-1.7243	0.852207	16.8909	-0.673725	0.502453	0.920114	0	0
hilic	pm2.5	lur	1	0	175.108	85.114	-0.169408	-0.351026	0.0122095	23.4822	-1.83665	0.0673894	0.882898	-0.231227	-0.452385	-0.0100695	23.4814	-2.06307	0.0405413	0.883312	-0.0291107	-0.366865	0.308644	23.4841	-0.171554	0.864227	0.98273	0	0
hilic	pm2.5	lur	1	0	332.262	37.6	0.490058	-0.0357153	1.01583	18.8499	1.83527	0.0675947	0.882898	0.434127	-0.203181	1.07143	18.8685	1.34414	0.180594	0.946573	0.685665	-0.315798	1.68713	18.8088	1.36278	0.176822	0.855884	0	0
hilic	pm2.5	lur	1	0	158.986	271.213	0.0844053	-0.0062921	0.175103	23.7714	1.83242	0.0680188	0.882898	0.0134685	-0.0744253	0.101362	23.8185	0.302371	0.762718	0.984574	0.185471	-0.0396835	0.410625	23.6678	1.63963	0.105058	0.855884	0	0
hilic	pm2.5	lur	1	0	311.02	88.513	-0.319967	-0.663826	0.0238916	19.1772	-1.83221	0.0680501	0.882898	-0.228158	-0.616847	0.160531	19.1789	-1.15827	0.248287	0.961983	-0.560711	-1.27806	0.156642	19.1734	-1.55581	0.12375	0.855884	0	0
hilic	pm2.5	lur	1	0	538.798	71.325	0.156571	-0.0119068	0.325049	23.3992	1.82987	0.0684015	0.882898	0.298039	0.0979073	0.498171	23.3949	2.93856	0.00372937	0.808299	-0.157564	-0.487107	0.17198	23.4088	-0.951685	0.344159	0.895002	0	0
hilic	pm2.5	lur	1	0	176.06	99.313	0.321186	-0.0246294	0.667001	20.0656	1.82879	0.0685637	0.882898	0.234499	-0.185441	0.654439	20.149	1.10187	0.271988	0.961983	0.497919	-0.132564	1.1284	19.8818	1.57194	0.119961	0.855884	0	0
hilic	pm2.5	lur	1	0	375.909	71.99	0.508922	-0.0396374	1.05748	19.4755	1.82675	0.068871	0.882898	0.814677	0.126952	1.5024	19.3056	2.33749	0.0205136	0.883312	0.0709709	-0.849852	0.991794	19.8498	0.15341	0.878466	0.984694	0	0
hilic	pm2.5	lur	1	0	377.145	121.48	0.145505	-0.0115031	0.302514	25.5939	1.82476	0.0691708	0.882898	0.147469	-0.0400783	0.335017	25.5883	1.55156	0.122524	0.891976	0.116475	-0.195582	0.428532	25.6062	0.742932	0.459726	0.911684	0	0
hilic	pm2.5	lur	1	0	121.084	57.557	-0.0748795	-0.155765	0.00600609	26.6818	-1.82282	0.0694665	0.882898	-0.061982	-0.15427	0.0303063	26.721	-1.32525	0.186769	0.952101	-0.089788	-0.261225	0.0816496	26.5957	-1.04247	0.300374	0.895002	0	0
hilic	pm2.5	lur	1	0	744.59	42.524	-0.272095	-0.566559	0.0223687	22.469	-1.81945	0.0699798	0.882898	-0.206772	-0.536661	0.123117	22.5027	-1.23681	0.217769	0.961983	-0.376846	-1.01523	0.261537	22.3947	-1.17499	0.243529	0.877873	0	0
hilic	pm2.5	lur	1	0	138.013	74.729	0.181107	-0.0155299	0.377744	22.3617	1.81351	0.070892	0.882898	0.231309	-0.0014311	0.464049	22.3632	1.9611	0.0514102	0.883312	0.0802233	-0.312732	0.473179	22.3583	0.406357	0.685579	0.944899	0	0
hilic	pm2.5	lur	1	0	300.201	40.311	0.237913	-0.0204081	0.496234	23.0221	1.81347	0.0708997	0.882898	0.364805	0.0479823	0.681628	23.1298	2.27207	0.024265	0.883312	-0.152757	-0.623496	0.317983	22.7849	-0.645907	0.520211	0.920494	0	0
hilic	pm2.5	lur	1	0	190.848	237.94	0.2864	-0.0247923	0.597593	20.8709	1.81215	0.0711026	0.882898	0.355487	-0.0477875	0.758762	20.8267	1.73941	0.0836729	0.883312	0.239614	-0.23534	0.714567	20.9683	1.00418	0.318358	0.895002	0	0
hilic	pm2.5	lur	1	0	334.836	67.586	0.0527905	-0.0045794	0.11016	26.5958	1.81185	0.0711492	0.882898	0.0671135	-0.0012653	0.135492	26.594	1.93672	0.0543457	0.883312	0.0266546	-0.0985725	0.151882	26.5999	0.423666	0.67296	0.943666	0	0
hilic	pm2.5	lur	1	0	220.935	270.366	0.186665	-0.0174901	0.390821	20.5494	1.80034	0.0729532	0.882898	0.258684	0.0138767	0.503492	20.6143	2.08508	0.0384728	0.883312	0.0121819	-0.371542	0.395906	20.4065	0.0631895	0.949775	0.995212	0	0
hilic	pm2.5	lur	1	0	251.099	90.924	-0.77398	-1.62191	0.0739465	16.5775	-1.79731	0.0734337	0.882898	-0.817426	-1.83678	0.201924	16.4632	-1.58235	0.115325	0.891976	-0.91332	-2.50638	0.67974	16.8293	-1.14115	0.257256	0.883262	0	0
hilic	pm2.5	lur	1	0	125.096	26.584	-0.14382	-0.301523	0.0138817	20.136	-1.7957	0.0736899	0.882898	-0.0859658	-0.296325	0.124393	20.1601	-0.806385	0.421085	0.961983	-0.265442	-0.48638	-0.0445034	20.0828	-2.39138	0.0191629	0.855884	0	0
hilic	pm2.5	lur	1	0	125.021	74.358	0.349716	-0.0337742	0.733207	21.4447	1.79561	0.0737042	0.882898	0.359714	-0.0667486	0.786178	21.3867	1.66439	0.0977748	0.883312	0.352025	-0.500992	1.20504	21.5723	0.821422	0.413877	0.905711	0	0
hilic	pm2.5	lur	1	0	559.406	38.399	-0.341402	-0.716375	0.0335711	18.0282	-1.79274	0.0741638	0.882898	-0.456566	-0.97875	0.0656184	17.7011	-1.72527	0.0861947	0.883312	-0.0103966	-0.375179	0.354385	18.7485	-0.0567296	0.954904	0.996502	0	0
hilic	pm2.5	lur	1	0	437.345	29.155	0.321072	-0.0329851	0.67513	15.6999	1.78558	0.0753188	0.882898	0.16787	-0.263005	0.598746	15.8241	0.768778	0.443033	0.961983	0.559416	-0.0732549	1.19209	15.4265	1.75998	0.0822818	0.855884	0	0
hilic	pm2.5	lur	1	0	351.991	73.595	-0.232491	-0.488992	0.0240113	22.488	-1.7847	0.075462	0.882898	-0.136834	-0.396323	0.122656	22.6047	-1.04052	0.299492	0.961983	-0.475932	-1.08846	0.136598	22.2309	-1.54656	0.125965	0.855884	0	0
hilic	pm2.5	lur	1	0	274.791	68.167	0.052245	-0.0053985	0.109889	23.9742	1.78462	0.0754758	0.882898	0.013771	-0.0539638	0.0815059	23.9719	0.401173	0.688768	0.970577	0.161496	0.0368401	0.286151	23.9793	2.57869	0.0117739	0.855884	0	0
hilic	pm2.5	lur	1	0	376.141	120.67	0.157454	-0.0163765	0.331284	22.7422	1.78352	0.0756541	0.882898	0.169632	-0.0356902	0.374955	22.7301	1.63023	0.104801	0.891976	0.168414	-0.184634	0.521462	22.7688	0.949501	0.345261	0.895002	0	0
hilic	pm2.5	lur	1	0	412.307	39.743	-0.236207	-0.497145	0.024732	22.0025	-1.7824	0.0758377	0.882898	-0.215509	-0.568262	0.137244	21.8327	-1.20552	0.229586	0.961983	-0.159092	-0.479721	0.161537	22.3766	-0.987634	0.326347	0.895002	0	0
hilic	pm2.5	lur	1	0	228.007	21.568	0.0885942	-0.0093235	0.186512	19.9514	1.78154	0.0759785	0.882898	0.107821	-0.0117613	0.227403	19.9957	1.77916	0.0769016	0.883312	0.0298919	-0.161113	0.220897	19.8539	0.311501	0.75624	0.964748	0	0
hilic	pm2.5	lur	1	0	236.12	38.286	0.258524	-0.0275017	0.544549	21.036	1.7797	0.0762796	0.882898	0.134609	-0.203397	0.472615	21.0032	0.785827	0.433002	0.961983	0.497869	-0.0692906	1.06503	21.1082	1.74727	0.0844759	0.855884	0	0
hilic	pm2.5	lur	1	0	198.085	100.113	0.112377	-0.0119779	0.236732	26.6207	1.77937	0.0763341	0.882898	0.0800182	-0.068092	0.228128	26.64	1.06606	0.287824	0.961983	0.175516	-0.0721722	0.423205	26.5781	1.41046	0.162328	0.855884	0	0
hilic	pm2.5	lur	1	0	337.153	122.77	0.164426	-0.0175582	0.346411	23.4881	1.77905	0.0763865	0.882898	0.178823	-0.0425432	0.400189	23.525	1.59401	0.112689	0.891976	0.142005	-0.207737	0.491748	23.4067	0.808176	0.421416	0.905711	0	0
hilic	pm2.5	lur	1	0	558.402	38.219	-0.301894	-0.636107	0.0323189	19.9636	-1.77862	0.0764577	0.882898	-0.235109	-0.666613	0.196395	19.5481	-1.07513	0.283755	0.961983	-0.256806	-0.737962	0.224351	20.8789	-1.06235	0.291313	0.895002	0	0
hilic	pm2.5	lur	1	0	300.261	33.368	-0.165814	-0.349883	0.0182547	19.418	-1.77375	0.0772615	0.882898	-0.222483	-0.449634	0.00466857	19.5193	-1.93268	0.0548457	0.883312	-0.0466496	-0.384586	0.291287	19.1948	-0.274766	0.784213	0.970036	0	0
hilic	pm2.5	lur	1	0	181.988	288.068	0.1216	-0.0137268	0.256928	22.7197	1.7693	0.0780029	0.882898	0.195668	0.0316368	0.359699	22.7483	2.35381	0.0196609	0.883312	-0.0342699	-0.294513	0.225974	22.6566	-0.26211	0.793919	0.970036	0	0
hilic	pm2.5	lur	1	0	278.875	67.725	0.0663254	-0.0075132	0.140164	22.8456	1.76867	0.0781074	0.882898	0.097248	0.0063844	0.188112	22.8471	2.11188	0.0360768	0.883312	-0.0033823	-0.148105	0.14134	22.8423	-0.0465189	0.963014	0.998705	0	0
hilic	pm2.5	lur	1	0	217.016	179.097	0.293573	-0.0337923	0.620939	19.0528	1.76577	0.0785943	0.882898	0.247175	-0.16405	0.6584	19.0792	1.18605	0.237166	0.961983	0.450589	-0.107602	1.00878	18.9946	1.60675	0.112099	0.855884	0	0
hilic	pm2.5	lur	1	0	225.911	288.085	0.155329	-0.0180971	0.328756	20.7212	1.76356	0.0789678	0.882898	0.0636329	-0.153076	0.280342	20.7092	0.579406	0.56304	0.961983	0.375733	0.0690223	0.682443	20.7477	2.43838	0.0169973	0.855884	0	0
hilic	pm2.5	lur	1	0	144.081	62.767	-0.0812352	-0.172115	0.00964415	24.4003	-1.76007	0.0795582	0.882898	-0.0498902	-0.160496	0.060715	24.4419	-0.890057	0.374624	0.961983	-0.160848	-0.341149	0.0194517	24.3089	-1.77571	0.0796318	0.855884	0	0
hilic	pm2.5	lur	1	0	939.838	86.091	-0.391183	-0.828831	0.0464652	18.0323	-1.75997	0.0795748	0.882898	-0.571144	-1.10666	-0.0356244	18.0934	-2.1045	0.0367236	0.883312	0.0114587	-0.776558	0.799476	17.8976	0.0289435	0.976983	0.998705	0	0
hilic	pm2.5	lur	1	0	228.007	267.955	0.0789906	-0.0096133	0.167594	20.6764	1.75539	0.0803569	0.882898	0.0491082	-0.030247	0.128463	20.7332	1.22111	0.22364	0.961983	0.149739	-0.0950972	0.394576	20.5513	1.21734	0.2271	0.863871	0	0
hilic	pm2.5	lur	1	0	139.087	36.067	-0.436636	-0.927039	0.0537668	19.3971	-1.75314	0.0807422	0.882898	-0.141503	-0.724107	0.441101	19.4278	-0.47926	0.632336	0.970577	-1.3588	-2.28863	-0.428978	19.3294	-2.90874	0.00471023	0.855884	0	0
hilic	pm2.5	lur	1	0	250.099	74.566	0.231399	-0.0288831	0.491681	21.7754	1.75052	0.0811937	0.882898	0.247084	-0.0843443	0.578513	21.7713	1.47107	0.143018	0.916187	0.20359	-0.230234	0.637414	21.7845	0.934101	0.353098	0.895002	0	0
hilic	pm2.5	lur	1	0	326.253	34.982	-0.200506	-0.426182	0.0251694	20.6895	-1.74942	0.0813846	0.882898	-0.0998725	-0.384856	0.185111	20.7872	-0.69152	0.49013	0.961983	-0.435642	-0.808873	-0.0624115	20.4743	-2.32329	0.0227364	0.855884	0	0
hilic	pm2.5	lur	1	0	412.717	65.504	-0.505541	-1.07473	0.0636441	19.155	-1.74886	0.0814825	0.882898	-0.995808	-1.64796	-0.343654	19.0685	-3.01303	0.00295939	0.808299	0.721932	-0.427638	1.8715	19.3455	1.25	0.214988	0.855884	0	0
hilic	pm2.5	lur	1	0	536.165	34.724	-0.177866	-0.378601	0.0228686	23.7654	-1.7447	0.0822043	0.882898	-0.107791	-0.355584	0.140001	23.8498	-0.85837	0.39183	0.961983	-0.43914	-0.790306	-0.0879748	23.5795	-2.4891	0.0149081	0.855884	0	0
hilic	pm2.5	lur	1	0	107.049	56.896	-0.0739527	-0.157777	0.00987169	23.3502	-1.73714	0.0835332	0.882898	-0.0706896	-0.165755	0.0243756	23.396	-1.46728	0.144046	0.916187	-0.0571727	-0.235041	0.120695	23.2494	-0.639796	0.524156	0.920494	0	0
hilic	pm2.5	lur	1	0	157.122	24.998	-0.162802	-0.347695	0.0220918	19.918	-1.73376	0.0841329	0.882898	-0.192637	-0.423802	0.0385283	19.8775	-1.64435	0.101849	0.885563	-0.0962071	-0.406981	0.214567	20.0072	-0.616188	0.539542	0.920494	0	0
hilic	pm2.5	lur	1	0	330.008	291.237	0.27899	-0.0380999	0.59608	20.2622	1.73244	0.0843681	0.882898	0.0222754	-0.310458	0.355009	20.3544	0.132101	0.895052	0.990901	0.813296	0.0844156	1.54218	20.059	2.22097	0.0292162	0.855884	0	0
hilic	pm2.5	lur	1	0	192.024	88.823	-0.11676	-0.249467	0.0159466	24.7471	-1.73242	0.0843713	0.882898	-0.071797	-0.210257	0.0666633	24.7895	-1.0232	0.307588	0.961983	-0.219867	-0.533582	0.093849	24.6536	-1.395	0.166926	0.855884	0	0
hilic	pm2.5	lur	1	0	264.119	89.689	0.524227	-0.0720576	1.12051	18.4177	1.73108	0.0846104	0.882898	0.346791	-0.35306	1.04664	18.5445	0.977778	0.329496	0.961983	0.913455	-0.270525	2.09744	18.1384	1.53565	0.128619	0.855884	0	0
hilic	pm2.5	lur	1	0	542.153	102.319	-0.370834	-0.794219	0.0525518	18.0923	-1.72462	0.0857702	0.882898	-0.254178	-0.740473	0.232118	18.2645	-1.03137	0.30375	0.961983	-0.60171	-1.49548	0.292064	17.7131	-1.34001	0.184082	0.855884	0	0
hilic	pm2.5	lur	1	0	210.251	111.434	-0.506034	-1.08428	0.0722073	16.3715	-1.72314	0.0860377	0.882898	-0.301497	-1.04632	0.443321	16.2498	-0.79875	0.425488	0.961983	-0.909161	-1.78514	-0.0331778	16.6395	-2.06583	0.0421219	0.855884	0	0
hilic	pm2.5	lur	1	0	265.035	59.429	-0.0833052	-0.178557	0.0119463	25.0697	-1.72207	0.0862321	0.882898	-0.0487761	-0.167496	0.0699434	25.048	-0.810706	0.418605	0.961983	-0.14446	-0.321458	0.0325382	25.1174	-1.62453	0.108245	0.855884	0	0
hilic	pm2.5	lur	1	0	105.037	46.168	-0.704534	-1.51042	0.10135	18.1316	-1.72139	0.0863551	0.882898	-0.81439	-1.81931	0.190526	18.6068	-1.59912	0.111548	0.891976	-0.255982	-1.66378	1.15182	17.0849	-0.361925	0.718375	0.9517	0	0
hilic	pm2.5	lur	1	0	336.834	67.349	0.0513596	-0.0074708	0.11019	24.9394	1.71898	0.0867944	0.882898	0.0617815	-0.0075753	0.131138	24.9379	1.75771	0.0804967	0.883312	0.0325384	-0.098767	0.163844	24.9429	0.493246	0.623207	0.93368	0	0
hilic	pm2.5	lur	1	0	135.048	101.52	-0.239547	-0.514161	0.0350673	21.0365	-1.71759	0.0870491	0.882898	-0.291623	-0.637483	0.0542374	21.0623	-1.66379	0.0978941	0.883312	-0.11504	-0.555541	0.325461	20.9795	-0.519818	0.604644	0.92951	0	0
hilic	pm2.5	lur	1	0	87.055	102.27	-0.084588	-0.181649	0.0124732	23.2651	-1.71599	0.087342	0.882898	-0.0659953	-0.186352	0.0543611	23.2978	-1.08199	0.280706	0.961983	-0.155386	-0.332265	0.0214927	23.1932	-1.74858	0.0842468	0.855884	0	0
hilic	pm2.5	lur	1	0	357.963	84.122	-0.325218	-0.698442	0.0480066	20.7403	-1.71575	0.0873845	0.882898	-0.520477	-0.97389	-0.0670643	20.7331	-2.26509	0.0246989	0.883312	0.216907	-0.471073	0.904886	20.756	0.627549	0.532109	0.920494	0	0
hilic	pm2.5	lur	1	0	358.303	38.111	-0.472836	-1.01547	0.0698009	18.1139	-1.71574	0.0873866	0.882898	-0.1454	-0.780009	0.489209	18.2331	-0.452102	0.65174	0.970577	-1.08379	-2.16454	-0.0030423	17.8513	-1.99605	0.049374	0.855884	0	0
hilic	pm2.5	lur	1	0	112.52	267.926	0.0868381	-0.0129607	0.186637	23.6841	1.71331	0.0878339	0.882898	0.0666352	-0.0386443	0.171915	23.718	1.24893	0.213313	0.961983	0.102247	-0.137922	0.342415	23.6096	0.84739	0.399337	0.901818	0	0
hilic	pm2.5	lur	1	0	280.826	66.446	0.0601557	-0.0089947	0.129306	23.5683	1.7129	0.0879086	0.882898	0.0361128	-0.0463894	0.118615	23.5512	0.863722	0.38889	0.961983	0.147848	0.00442358	0.291272	23.606	2.05184	0.0434981	0.855884	0	0
hilic	pm2.5	lur	1	0	452.373	38.03	-0.247781	-0.532689	0.0371269	20.3982	-1.71244	0.0879947	0.882898	-0.0625253	-0.398904	0.273853	20.4454	-0.36678	0.714214	0.972575	-0.640392	-1.19437	-0.086417	20.2941	-2.30094	0.0240315	0.855884	0	0
hilic	pm2.5	lur	1	0	210.05	60.865	-0.0720932	-0.155119	0.0109326	25.7786	-1.70975	0.0884918	0.882898	-0.077011	-0.168348	0.0143264	25.8056	-1.66373	0.097907	0.883312	-0.051714	-0.233809	0.130381	25.7191	-0.565275	0.573489	0.925369	0	0
hilic	pm2.5	lur	1	0	370.243	40.678	-0.419876	-0.904072	0.064321	16.308	-1.70746	0.088917	0.882898	-0.330098	-0.9677	0.307504	16.4104	-1.02158	0.308352	0.961983	-0.511142	-1.19549	0.173204	16.0822	-1.48667	0.14108	0.855884	0	0
hilic	pm2.5	lur	1	0	251.164	128.985	-0.174584	-0.376017	0.0268493	19.8785	-1.70657	0.0890822	0.882898	-0.101363	-0.347817	0.145091	19.8806	-0.811564	0.418114	0.961983	-0.438074	-0.794708	-0.0814403	19.8739	-2.44498	0.0167112	0.855884	0	0
hilic	pm2.5	lur	1	0	401.009	57.293	0.428444	-0.0665063	0.923395	19.3641	1.70445	0.0894785	0.882898	0.568202	-0.0557057	1.19211	19.2871	1.79705	0.074004	0.883312	0.0131549	-0.826648	0.852958	19.5336	0.031179	0.975205	0.998705	0	0
hilic	pm2.5	lur	1	0	360.063	88.585	0.429202	-0.0677345	0.926139	18.326	1.70064	0.0901929	0.882898	0.538146	-0.0451188	1.12141	18.2614	1.82059	0.0703299	0.883312	0.270871	-0.728236	1.26998	18.4684	0.539636	0.590965	0.927631	0	0
hilic	pm2.5	lur	1	0	363.929	84.005	0.0612342	-0.0097501	0.132218	24.9611	1.69857	0.0905832	0.882898	0.0463037	-0.0442768	0.136884	24.9762	1.00869	0.314476	0.961983	0.100649	-0.0308336	0.232132	24.9276	1.52367	0.131583	0.855884	0	0
hilic	pm2.5	lur	1	0	520.649	66.645	0.488816	-0.0779443	1.05558	18.4921	1.69823	0.0906466	0.882898	0.306359	-0.369856	0.982574	18.6927	0.893973	0.37253	0.961983	1.10907	0.0163018	2.20183	18.0504	2.02014	0.0467581	0.855884	0	0
hilic	pm2.5	lur	1	0	111.08	25.621	-0.194258	-0.420182	0.031666	20.0434	-1.69304	0.0916316	0.882898	-0.101168	-0.384939	0.182603	20.0607	-0.703482	0.482664	0.961983	-0.357421	-0.748428	0.0335861	20.0053	-1.81947	0.0726272	0.855884	0	0
hilic	pm2.5	lur	1	0	156.053	119.241	-0.449705	-0.972868	0.0734584	18.9253	-1.69255	0.0917254	0.882898	-0.754502	-1.40336	-0.105648	18.8952	-2.29452	0.0229152	0.883312	0.0640667	-0.82575	0.953883	18.9914	0.143312	0.886409	0.988701	0	0
hilic	pm2.5	lur	1	0	227.164	27.503	0.200929	-0.0329323	0.43479	20.3083	1.69175	0.0918788	0.882898	0.23015	-0.0201631	0.480463	20.3171	1.81428	0.071299	0.883312	0.0932113	-0.449688	0.636111	20.2891	0.341743	0.733452	0.959564	0	0
hilic	pm2.5	lur	1	0	100.014	268.988	0.0634546	-0.0105625	0.137472	21.9927	1.68804	0.0925895	0.882898	0.0321515	-0.0379011	0.102204	22.0304	0.905639	0.366338	0.961983	0.137308	-0.0620306	0.336646	21.9098	1.37105	0.17424	0.855884	0	0
hilic	pm2.5	lur	1	0	215.062	100.767	0.358648	-0.0602196	0.777515	16.9169	1.68594	0.0929928	0.882898	0.34048	-0.170325	0.851285	17.0658	1.31527	0.190092	0.952101	0.396185	-0.384152	1.17652	16.5888	1.01057	0.315307	0.895002	0	0
hilic	pm2.5	lur	1	0	135.117	32.847	-0.275083	-0.596781	0.0466155	20.727	-1.6837	0.0934252	0.882898	-0.307732	-0.75413	0.138667	20.9344	-1.36028	0.175443	0.940505	-0.173924	-0.511503	0.163654	20.2704	-1.0255	0.308257	0.895002	0	0
hilic	pm2.5	lur	1	0	278.025	101.393	0.328668	-0.0557787	0.713115	18.4686	1.68334	0.0934953	0.882898	0.377394	-0.106066	0.860853	18.482	1.54033	0.125237	0.891976	0.420516	-0.185871	1.0269	18.439	1.38033	0.171378	0.855884	0	0
hilic	pm2.5	lur	1	0	284.961	275.001	0.141826	-0.0241508	0.307803	20.2319	1.68252	0.0936552	0.882898	0.0875217	-0.10849	0.283533	20.292	0.881073	0.379453	0.961983	0.289136	-0.0470589	0.625332	20.0996	1.71183	0.0908502	0.855884	0	0
hilic	pm2.5	lur	1	0	134.058	101.969	-0.175373	-0.380938	0.0301909	20.65	-1.67984	0.0941764	0.882898	-0.168351	-0.426075	0.0893736	20.7053	-1.28896	0.199068	0.957234	-0.209518	-0.560246	0.141209	20.5281	-1.18906	0.237979	0.877002	0	0
hilic	pm2.5	lur	1	0	123.08	26.366	-0.212428	-0.461493	0.0366359	20.7857	-1.67939	0.0942631	0.882898	-0.144425	-0.466276	0.177426	20.7444	-0.885455	0.377093	0.961983	-0.424454	-0.805326	-0.0435812	20.8766	-2.2182	0.0294121	0.855884	0	0
hilic	pm2.5	lur	1	0	90.993	83.383	0.0831841	-0.0143623	0.180731	21.9839	1.67911	0.0943175	0.882898	0.080501	-0.03615	0.197152	21.9736	1.36173	0.174985	0.940505	0.0744403	-0.122975	0.271856	22.0066	0.750546	0.455155	0.910009	0	0
hilic	pm2.5	lur	1	0	198.046	43.466	-0.405718	-0.881684	0.0702474	17.1805	-1.67842	0.0944532	0.882898	-0.30858	-0.81181	0.194651	17.2027	-1.20998	0.227873	0.961983	-0.659566	-1.76723	0.448098	17.1317	-1.18522	0.239481	0.877673	0	0
hilic	pm2.5	lur	1	0	771.498	68.221	0.445675	-0.0786551	0.970006	19.3701	1.67365	0.0953882	0.882898	0.199607	-0.374628	0.773841	19.6338	0.685905	0.493655	0.961983	1.08498	-0.0624216	2.23238	18.7894	1.88216	0.0634961	0.855884	0	0
hilic	pm2.5	lur	1	0	546.063	89.839	-0.483256	-1.05229	0.0857782	15.719	-1.67221	0.0956727	0.882898	-0.323073	-1.012	0.365853	15.6245	-0.92535	0.356023	0.961983	-0.753173	-1.83147	0.325127	15.9271	-1.39029	0.168345	0.855884	0	0
hilic	pm2.5	lur	1	0	197.079	45.669	0.452177	-0.0805181	0.984872	16.6492	1.6714	0.0958316	0.882898	0.222416	-0.412763	0.857596	16.4399	0.690952	0.490486	0.961983	1.02198	-0.00241	2.04638	17.11	1.98576	0.0505284	0.855884	0	0
hilic	pm2.5	lur	1	0	192.04	60.928	-0.0841962	-0.183443	0.0150503	24.9562	-1.67043	0.0960239	0.882898	-0.0384446	-0.157167	0.0802779	24.9742	-0.63897	0.523655	0.961983	-0.165436	-0.359965	0.0290931	24.9166	-1.69276	0.0944406	0.855884	0	0
hilic	pm2.5	lur	1	0	444.316	40.934	-0.275501	-0.600319	0.0493176	19.339	-1.67006	0.0960962	0.882898	-0.179873	-0.565046	0.2053	19.2183	-0.921485	0.358031	0.961983	-0.393263	-0.996588	0.210061	19.6046	-1.29743	0.19826	0.855884	0	0
hilic	pm2.5	lur	1	0	153.077	90.009	0.122667	-0.0219978	0.267331	25.8196	1.66961	0.0961857	0.882898	0.140716	-0.035453	0.316886	25.8046	1.57613	0.116752	0.891976	0.0636884	-0.215561	0.342938	25.8527	0.453961	0.651101	0.937675	0	0
hilic	pm2.5	lur	1	0	298.274	273.974	-0.286235	-0.623814	0.0513449	20.4828	-1.66954	0.0961999	0.882898	0.0267738	-0.332402	0.385949	20.6299	0.147089	0.883226	0.990901	-0.861627	-1.62008	-0.103175	20.159	-2.26121	0.0264958	0.855884	0	0
hilic	pm2.5	lur	1	0	236.005	123.122	0.305992	-0.0552504	0.667234	18.4078	1.66787	0.0965316	0.882898	0.125703	-0.327356	0.578762	18.418	0.54748	0.584727	0.963422	0.742509	0.148834	1.33618	18.3856	2.48945	0.0148944	0.855884	0	0
hilic	pm2.5	lur	1	0	116.972	286.133	0.130496	-0.0237616	0.284754	20.6668	1.66572	0.0969601	0.882898	0.139431	-0.02624	0.305103	20.7153	1.6607	0.0985147	0.883312	0.0577937	-0.298888	0.414475	20.56	0.322515	0.747914	0.961695	0	0
hilic	pm2.5	lur	1	0	399.347	289.701	0.403619	-0.0734945	0.880733	21.0904	1.66572	0.0969605	0.882898	0.123855	-0.471214	0.718924	21.0673	0.4107	0.681781	0.970577	1.14315	0.323455	1.96285	21.1412	2.77588	0.00687042	0.855884	0	0
hilic	pm2.5	lur	1	0	105.084	54.06	0.445942	-0.0842547	0.976138	22.2054	1.65612	0.0988896	0.882898	0.645603	0.00781999	1.28339	21.871	1.99743	0.0472853	0.883312	0.0339177	-0.966059	1.03389	22.942	0.067513	0.946344	0.993135	0	0
hilic	pm2.5	lur	1	0	98.024	101.625	-0.193675	-0.425223	0.0378728	18.6316	-1.64696	0.10076	0.882898	-0.133279	-0.406001	0.139443	18.7158	-0.964317	0.336181	0.961983	-0.352903	-0.825259	0.119454	18.446	-1.48708	0.140972	0.855884	0	0
hilic	pm2.5	lur	1	0	360.839	65.628	0.0928428	-0.0183576	0.204043	22.6176	1.64397	0.101378	0.882898	0.0980016	-0.0409289	0.236932	22.5871	1.39192	0.165665	0.92402	0.0864413	-0.112592	0.285475	22.6847	0.864461	0.389952	0.895002	0	0
hilic	pm2.5	lur	1	0	283.282	27.808	0.214175	-0.0427088	0.471059	17.9115	1.64166	0.101856	0.882898	0.188315	-0.100571	0.477202	17.882	1.28628	0.199997	0.957234	0.177253	-0.362509	0.717014	17.9764	0.653645	0.515239	0.920114	0	0
hilic	pm2.5	lur	1	0	153.091	24.349	-0.147909	-0.325651	0.0298334	20.6191	-1.63853	0.102507	0.882898	-0.0785028	-0.308496	0.151491	20.5553	-0.673516	0.501483	0.961983	-0.245539	-0.523395	0.032317	20.7597	-1.75894	0.0824592	0.855884	0	0
hilic	pm2.5	lur	1	0	336.149	122.677	0.192504	-0.0390959	0.424104	20.2451	1.63664	0.102902	0.882898	0.220101	-0.0640891	0.504292	20.2464	1.52824	0.128209	0.891976	0.141204	-0.2924	0.574808	20.2421	0.648192	0.51874	0.920494	0	0
hilic	pm2.5	lur	1	0	148.11	114.727	0.334598	-0.0683112	0.737507	28.7249	1.63519	0.103206	0.882898	0.432235	-0.0556323	0.920101	28.6952	1.74822	0.0821309	0.883312	0.0206399	-0.71082	0.752099	28.7904	0.0561651	0.955352	0.996502	0	0
hilic	pm2.5	lur	1	0	133.089	107.464	-0.358907	-0.791244	0.0734292	19.6954	-1.6346	0.103329	0.882898	-0.48132	-1.06008	0.0974441	19.6734	-1.64101	0.102542	0.885563	0.0185722	-0.556946	0.59409	19.744	0.0642326	0.948947	0.994728	0	0
hilic	pm2.5	lur	1	0	528.411	38.507	-0.240984	-0.53154	0.0495716	19.0467	-1.63309	0.103647	0.882898	-0.208482	-0.574964	0.158	18.6033	-1.12252	0.263137	0.961983	-0.116306	-0.569544	0.336931	20.0232	-0.510772	0.610935	0.92951	0	0
hilic	pm2.5	lur	1	0	86.111	59.086	-0.146271	-0.322642	0.0301	21.6616	-1.63298	0.103669	0.882898	-0.0903113	-0.281901	0.101278	21.678	-0.930139	0.353545	0.961983	-0.281135	-0.686605	0.124336	21.6255	-1.38008	0.171453	0.855884	0	0
hilic	pm2.5	lur	1	0	166.086	62.684	-0.0675879	-0.149226	0.0140498	31.5354	-1.63016	0.104265	0.882898	-0.0688361	-0.160272	0.0225997	31.5696	-1.48552	0.139156	0.915223	-0.0471427	-0.226139	0.131854	31.4602	-0.524227	0.601588	0.92951	0	0
hilic	pm2.5	lur	1	0	464.777	67.091	0.40849	-0.0869079	0.903887	17.7337	1.6236	0.10566	0.882898	0.0795748	-0.455142	0.614292	17.5179	0.29365	0.769364	0.986872	0.924966	-0.166111	2.01604	18.209	1.68741	0.0954688	0.855884	0	0
hilic	pm2.5	lur	1	0	302.011	65.476	-0.172128	-0.381421	0.037165	21.0786	-1.61938	0.106565	0.882898	0.025257	-0.22072	0.271234	21.0823	0.202612	0.839667	0.988245	-0.564901	-0.955742	-0.17406	21.0703	-2.87688	0.00516193	0.855884	0	0
hilic	pm2.5	lur	1	0	181.014	271.282	0.0757939	-0.0164175	0.168005	23.1214	1.61845	0.106763	0.882898	0.0242616	-0.0532276	0.101751	23.1726	0.617813	0.53748	0.961983	0.129756	-0.121024	0.380537	23.0085	1.02988	0.30621	0.895002	0	0
hilic	pm2.5	lur	1	0	126.055	290.096	-0.30987	-0.687134	0.0673943	16.9249	-1.61728	0.107017	0.882898	-0.368732	-0.839196	0.101732	17.0334	-1.54654	0.12373	0.891976	-0.107376	-0.778736	0.563984	16.6859	-0.318348	0.751061	0.962208	0	0
hilic	pm2.5	lur	1	0	101.509	268.228	0.0976495	-0.0212612	0.21656	21.6432	1.61696	0.107085	0.882898	0.0344934	-0.0760667	0.145054	21.718	0.615624	0.53892	0.961983	0.222142	-0.089293	0.533577	21.4785	1.41976	0.159612	0.855884	0	0
hilic	pm2.5	lur	1	0	140.107	38.323	0.437584	-0.095535	0.970702	20.2566	1.61617	0.107255	0.882898	0.359903	-0.297671	1.01748	20.399	1.07999	0.281593	0.961983	0.372305	-0.577605	1.32222	19.9429	0.78013	0.437645	0.905711	0	0
hilic	pm2.5	lur	1	0	285.099	55.495	-0.584009	-1.29558	0.127564	20.6137	-1.61604	0.107285	0.882898	-0.591853	-1.46199	0.27828	20.3864	-1.34217	0.181233	0.946594	-0.998344	-2.22352	0.226835	21.1144	-1.62193	0.108803	0.855884	0	0
hilic	pm2.5	lur	1	0	295.211	33.127	-0.211451	-0.469671	0.0467699	19.6023	-1.61239	0.108077	0.882898	-0.0866676	-0.406011	0.232676	19.6762	-0.535521	0.59295	0.964792	-0.378872	-0.821027	0.0632836	19.4397	-1.70556	0.0920182	0.855884	0	0
hilic	pm2.5	lur	1	0	228.128	51.905	0.215838	-0.0477492	0.479426	23.169	1.61233	0.108089	0.882898	0.144238	-0.176768	0.465244	23.1835	0.886635	0.376458	0.961983	0.385151	-0.0823573	0.852659	23.1372	1.6398	0.105022	0.855884	0	0
hilic	pm2.5	lur	1	0	252.108	109.021	0.397096	-0.0878849	0.882077	17.3527	1.61221	0.108115	0.882898	0.423527	-0.136931	0.983986	17.4399	1.49113	0.137677	0.915223	0.38977	-0.619604	1.39914	17.1607	0.768611	0.444416	0.905711	0	0
hilic	pm2.5	lur	1	0	302.196	34.651	0.131399	-0.0290836	0.291882	20.6183	1.61219	0.108121	0.882898	0.135404	-0.0158534	0.286661	20.6498	1.76642	0.0790213	0.883312	0.102943	-0.318839	0.524725	20.5489	0.485802	0.628452	0.93368	0	0
hilic	pm2.5	lur	1	0	100.029	275.724	0.116902	-0.0259911	0.259795	23.3347	1.61087	0.108406	0.882898	0.16449	-0.0102611	0.339242	23.3491	1.85737	0.0648927	0.883312	-0.0539293	-0.31936	0.211501	23.303	-0.404412	0.687002	0.944899	0	0
hilic	pm2.5	lur	1	0	131.974	294.8	0.170809	-0.0380559	0.379674	21.2944	1.61026	0.10854	0.882898	0.136173	-0.129378	0.401724	21.3261	1.01186	0.312962	0.961983	0.259143	-0.0977641	0.616051	21.2247	1.44522	0.15235	0.855884	0	0
hilic	pm2.5	lur	1	0	204.927	172.144	-0.432932	-0.963316	0.0974518	15.2674	-1.60724	0.109202	0.882898	-0.49356	-1.11755	0.13043	15.1338	-1.56078	0.120333	0.891976	-0.334831	-1.40505	0.73539	15.5617	-0.622734	0.535253	0.920494	0	0
hilic	pm2.5	lur	1	0	199.088	100.117	0.106876	-0.0240604	0.237812	22.6028	1.6072	0.10921	0.882898	0.0789094	-0.073502	0.231321	22.6296	1.02162	0.308332	0.961983	0.160911	-0.110508	0.432329	22.5436	1.18004	0.241526	0.877873	0	0
hilic	pm2.5	lur	1	0	514.377	38.066	-0.277026	-0.616443	0.062391	20.0376	-1.60708	0.109236	0.882898	-0.221283	-0.65933	0.216764	19.613	-0.996793	0.320203	0.961983	-0.19225	-0.682812	0.298311	20.9728	-0.780052	0.437691	0.905711	0	0
hilic	pm2.5	lur	1	0	354.378	51.388	0.540022	-0.121752	1.2018	17.9789	1.60677	0.109305	0.882898	0.6546	-0.158634	1.46783	17.7767	1.58832	0.113969	0.891976	0.347264	-0.839919	1.53445	18.4242	0.582227	0.562072	0.921156	0	0
hilic	pm2.5	lur	1	0	539.162	36.898	-0.379134	-0.843835	0.0855657	18.6657	-1.60647	0.109371	0.882898	-0.285505	-0.820463	0.249452	18.7553	-1.05311	0.293703	0.961983	-0.818839	-1.74207	0.104392	18.4684	-1.76538	0.0813635	0.855884	0	0
hilic	pm2.5	lur	1	0	186.019	287.695	-0.156564	-0.348488	0.035361	23.0521	-1.60624	0.10942	0.882898	-0.175525	-0.415368	0.0643184	23.0518	-1.44407	0.150457	0.920753	-0.109866	-0.455406	0.235674	23.0528	-0.63287	0.528646	0.920494	0	0
hilic	pm2.5	lur	1	0	149.06	60.107	-0.0783296	-0.174409	0.0177498	24.0026	-1.60527	0.109635	0.882898	-0.103694	-0.23133	0.023942	24.1328	-1.60309	0.110668	0.891976	-0.0182623	-0.157079	0.120554	23.7158	-0.261856	0.794113	0.970036	0	0
hilic	pm2.5	lur	1	0	113.017	20.374	0.101765	-0.0230844	0.226615	21.1708	1.60496	0.109703	0.882898	0.125351	-0.0283588	0.279061	21.166	1.60918	0.10933	0.891976	-0.019124	-0.242021	0.203773	21.1815	-0.170775	0.864837	0.98273	0	0
hilic	pm2.5	lur	1	0	131.697	58.438	-0.315766	-0.70342	0.0718875	20.5859	-1.60388	0.10994	0.882898	-0.0871984	-0.519446	0.345049	20.7622	-0.398065	0.691054	0.970577	-0.756077	-1.59706	0.0849031	20.1975	-1.7895	0.0773669	0.855884	0	0
hilic	pm2.5	lur	1	0	284.91	71.792	0.0680101	-0.0155084	0.151529	25.8798	1.6034	0.110047	0.882898	0.10726	0.00664785	0.207872	25.8933	2.10361	0.0368019	0.883312	-0.0180675	-0.188815	0.15268	25.85	-0.210617	0.833728	0.980706	0	0
hilic	pm2.5	lur	1	0	271.998	72.94	-0.145164	-0.323528	0.0332004	21.8186	-1.60251	0.110242	0.882898	-0.164006	-0.403102	0.0750897	21.873	-1.35353	0.177585	0.942491	-0.110181	-0.355036	0.134674	21.6987	-0.89567	0.37315	0.895002	0	0
hilic	pm2.5	lur	1	0	260.897	65.297	0.301908	-0.0699001	0.673717	17.9472	1.59885	0.111055	0.882898	0.118514	-0.274785	0.511813	17.7756	0.594599	0.552859	0.961983	0.62193	-0.238126	1.48199	18.3252	1.43934	0.154003	0.855884	0	0
hilic	pm2.5	lur	1	0	137.046	56.412	0.137429	-0.0318827	0.30674	27.7518	1.59824	0.11119	0.882898	0.107641	-0.108912	0.324194	27.6221	0.980825	0.327996	0.961983	0.186967	-0.0926182	0.466552	28.0375	1.33107	0.186994	0.855884	0	0
hilic	pm2.5	lur	1	0	169.027	75.746	0.181262	-0.0421413	0.404665	22.3308	1.5976	0.111333	0.882898	0.226423	-0.0225354	0.475381	22.3841	1.79462	0.0743929	0.883312	0.0891014	-0.407242	0.585445	22.2135	0.357316	0.721808	0.953181	0	0
hilic	pm2.5	lur	1	0	106.107	54.245	0.104011	-0.0244618	0.232484	27.0357	1.59411	0.112112	0.882898	0.139656	-0.014985	0.294297	27.0049	1.78202	0.0764317	0.883312	0.00417035	-0.245227	0.253568	27.1034	0.0332836	0.973532	0.998705	0	0
hilic	pm2.5	lur	1	0	159.084	121.116	-0.381067	-0.851992	0.0898581	18.6759	-1.59331	0.112291	0.882898	-0.3176	-0.857122	0.221922	18.8467	-1.16158	0.246944	0.961983	-0.546745	-1.51559	0.422097	18.2998	-1.12327	0.264726	0.886342	0	0
hilic	pm2.5	lur	1	0	424.742	64.494	0.22182	-0.0523609	0.496	20.2926	1.59299	0.112362	0.882898	0.0899439	-0.246797	0.426685	20.2228	0.527053	0.598806	0.966918	0.647801	0.16389	1.13171	20.4465	2.66457	0.00934196	0.855884	0	0
hilic	pm2.5	lur	1	0	442.337	35.974	-0.154601	-0.345758	0.0365574	21.1139	-1.59246	0.112481	0.882898	-0.12298	-0.341094	0.0951337	21.0898	-1.11258	0.267374	0.961983	-0.256612	-0.653141	0.139916	21.1668	-1.28811	0.201467	0.855884	0	0
hilic	pm2.5	lur	1	0	504.305	51.229	0.230732	-0.0546625	0.516127	23.039	1.59189	0.11261	0.882898	0.175364	-0.134519	0.485247	23.2176	1.11666	0.265629	0.961983	0.494838	-0.11927	1.10895	22.6455	1.60387	0.112733	0.855884	0	0
hilic	pm2.5	lur	1	0	260.149	36.33	0.213354	-0.0505938	0.477302	19.4102	1.5916	0.112676	0.882898	0.210157	-0.0648175	0.485132	19.4391	1.5081	0.133283	0.904786	0.305826	-0.295372	0.907023	19.3466	1.01253	0.314376	0.895002	0	0
hilic	pm2.5	lur	1	0	102.536	275.486	0.11889	-0.0283724	0.266153	25.3872	1.58966	0.113112	0.882898	0.103919	-0.075174	0.283012	25.3876	1.14497	0.253742	0.961983	0.0865637	-0.190553	0.36368	25.3862	0.621761	0.535889	0.920494	0	0
hilic	pm2.5	lur	1	0	120.081	60.788	-0.0639589	-0.143362	0.0154442	30.2877	-1.58604	0.113931	0.882898	-0.0562847	-0.146006	0.033437	30.3278	-1.23786	0.217381	0.961983	-0.0692292	-0.23789	0.099432	30.1995	-0.817005	0.416382	0.905711	0	0
hilic	pm2.5	lur	1	0	373.057	87.578	-0.274204	-0.614664	0.0662559	20.5932	-1.58584	0.113977	0.882898	-0.279161	-0.706934	0.148612	20.6174	-1.28771	0.199499	0.957234	-0.3658	-0.957006	0.225406	20.5398	-1.23156	0.221767	0.863414	0	0
hilic	pm2.5	lur	1	0	538.709	54.103	0.254187	-0.0615017	0.569875	20.2294	1.58542	0.114072	0.882898	0.208481	-0.122997	0.539959	20.2686	1.24105	0.216201	0.961983	0.531954	-0.196799	1.26071	20.1431	1.45293	0.150204	0.855884	0	0
hilic	pm2.5	lur	1	0	111.02	269.884	0.0830327	-0.0203038	0.186369	28.556	1.58214	0.114818	0.882898	0.0481911	-0.0647951	0.161177	28.5589	0.841627	0.401114	0.961983	0.119323	-0.118825	0.357472	28.5497	0.997304	0.321661	0.895002	0	0
hilic	pm2.5	lur	1	0	113.096	121.04	0.136104	-0.0333466	0.305556	19.799	1.58154	0.114957	0.882898	0.200546	0.00070941	0.400382	19.8146	1.98024	0.0492008	0.883312	0.046168	-0.294716	0.387052	19.7646	0.269578	0.788188	0.970036	0	0
hilic	pm2.5	lur	1	0	570.665	67.778	0.0567985	-0.0139167	0.127514	24.7702	1.58152	0.114961	0.882898	0.0730525	-0.0184421	0.164547	24.77	1.5755	0.116898	0.891976	0.0259237	-0.0995415	0.151389	24.7707	0.411268	0.68199	0.944899	0	0
hilic	pm2.5	lur	1	0	495.936	64.841	-0.356018	-0.799673	0.0876365	17.3113	-1.58008	0.115291	0.882898	-0.336983	-0.865339	0.191373	17.3882	-1.25852	0.209835	0.961983	-0.112526	-0.940783	0.715732	17.1419	-0.270418	0.787544	0.970036	0	0
hilic	pm2.5	lur	1	0	608.524	36.398	0.399217	-0.0992789	0.897713	19.0719	1.57688	0.116025	0.882898	0.475601	-0.138231	1.08943	19.1739	1.52887	0.128052	0.891976	0.240886	-0.614077	1.09585	18.8472	0.560808	0.576515	0.925369	0	0
hilic	pm2.5	lur	1	0	273.121	75.663	0.754621	-0.18801	1.69725	15.7361	1.5763	0.116159	0.882898	0.926034	-0.219606	2.07167	15.6845	1.59499	0.11247	0.891976	0.140884	-1.5951	1.87687	15.8497	0.161535	0.872085	0.984419	0	0
hilic	pm2.5	lur	1	0	305.303	31.492	-0.332182	-0.747483	0.0831185	16.1203	-1.57494	0.116472	0.882898	-0.480221	-0.982261	0.0218186	16.2528	-1.88748	0.0607059	0.883312	-0.0764796	-0.856142	0.703183	15.8284	-0.195249	0.845699	0.980706	0	0
hilic	pm2.5	lur	1	0	195.993	294.656	0.144872	-0.0364286	0.326172	23.4764	1.57339	0.116831	0.882898	0.225715	0.0319603	0.41947	23.4906	2.29872	0.0226699	0.883312	-0.0821335	-0.505971	0.341704	23.4452	-0.385719	0.700742	0.946105	0	0
hilic	pm2.5	lur	1	0	140.058	75.222	0.580974	-0.146443	1.30839	19.7123	1.57262	0.117009	0.882898	0.0406403	-0.864243	0.945524	19.5695	0.0886222	0.929481	0.990901	1.65575	0.404326	2.90717	20.0268	2.63354	0.0101622	0.855884	0	0
hilic	pm2.5	lur	1	0	121.078	59	-0.183157	-0.412498	0.0461851	21.8522	-1.5725	0.117037	0.882898	-0.0977332	-0.307364	0.111897	21.8137	-0.919954	0.358828	0.961983	-0.378165	-0.905139	0.14881	21.9372	-1.42837	0.157126	0.855884	0	0
hilic	pm2.5	lur	1	0	294.206	31.253	-0.35256	-0.794764	0.0896436	17.3461	-1.56986	0.117649	0.882898	-0.300024	-0.854942	0.254894	17.5557	-1.06686	0.287466	0.961983	-0.471411	-1.24366	0.300835	16.8843	-1.21505	0.227966	0.863918	0	0
hilic	pm2.5	lur	1	0	335.125	284.631	0.123008	-0.0312971	0.277314	21.2	1.56966	0.117698	0.882898	0.170632	-0.0167696	0.358033	21.2429	1.79666	0.0740669	0.883312	0.0903666	-0.201536	0.382269	21.1055	0.616198	0.539535	0.920494	0	0
hilic	pm2.5	lur	1	0	326.987	76.127	0.176776	-0.0450344	0.398586	22.6979	1.56925	0.117792	0.882898	0.234927	-0.0409951	0.510849	22.6562	1.68006	0.0946807	0.883312	0.0148898	-0.380835	0.410615	22.7898	0.0748939	0.940488	0.992091	0	0
hilic	pm2.5	lur	1	0	596.496	36.716	-0.514986	-1.1613	0.131328	18.099	-1.56893	0.117867	0.882898	-0.453357	-1.26552	0.358809	17.9419	-1.10147	0.272162	0.961983	-0.722118	-1.82873	0.384491	18.445	-1.29887	0.197768	0.855884	0	0
hilic	pm2.5	lur	1	0	315.015	109.981	0.22161	-0.0570392	0.500259	20.5225	1.56597	0.118559	0.882898	0.270417	-0.0441196	0.584954	20.6015	1.69645	0.0915295	0.883312	0.241236	-0.353222	0.835694	20.3485	0.807739	0.421666	0.905711	0	0
hilic	pm2.5	lur	1	0	389.878	85.589	-0.388591	-0.877538	0.100357	16.829	-1.56488	0.118813	0.882898	-0.481362	-1.08599	0.123263	16.8838	-1.57095	0.117949	0.891976	-0.164537	-1.00834	0.67927	16.7082	-0.388124	0.698968	0.945635	0	0
hilic	pm2.5	lur	1	0	333.144	41.629	0.600535	-0.155542	1.35661	17.6024	1.56395	0.119031	0.882898	1.32618	0.399518	2.25283	17.9164	2.82397	0.00527808	0.883312	-0.883697	-2.20743	0.44004	16.9108	-1.32878	0.187747	0.855884	0	0
hilic	pm2.5	lur	1	0	323.258	36.832	-0.395629	-0.894443	0.103184	17.6598	-1.56171	0.119558	0.882898	-0.559197	-1.18699	0.0686011	17.9801	-1.75761	0.0805136	0.883312	-0.0003504	-0.844704	0.844003	16.9545	-0.0008261	0.999343	0.999602	0	0
hilic	pm2.5	lur	1	0	272.794	68.462	0.0459067	-0.0120559	0.103869	24.9808	1.55948	0.120086	0.882898	0.00538457	-0.0610531	0.0718222	24.9805	0.159924	0.87312	0.989597	0.160985	0.0320077	0.289962	24.9813	2.4844	0.0150911	0.855884	0	0
hilic	pm2.5	lur	1	0	702.644	65.932	0.124097	-0.0325978	0.280792	23.3762	1.5594	0.120104	0.882898	0.194894	0.0257818	0.364006	23.3743	2.27406	0.0241429	0.883312	-0.0364315	-0.40006	0.327197	23.3804	-0.199421	0.842446	0.980706	0	0
hilic	pm2.5	lur	1	0	185.989	271.766	0.0839327	-0.0223687	0.190234	21.4491	1.55469	0.121223	0.882898	0.0374024	-0.0367598	0.111565	21.5215	0.995164	0.320993	0.961983	0.157513	-0.161884	0.476909	21.2896	0.981602	0.329292	0.895002	0	0
hilic	pm2.5	lur	1	0	125.06	24.192	0.101196	-0.0269759	0.229369	19.4792	1.55461	0.121241	0.882898	0.143493	-0.0165467	0.303532	19.4886	1.76922	0.0785514	0.883312	0.0313208	-0.200908	0.26355	19.4583	0.268452	0.789051	0.970036	0	0
hilic	pm2.5	lur	1	0	528.308	45.132	0.393556	-0.106068	0.89318	21.0535	1.55101	0.122102	0.882898	0.428585	-0.176717	1.03389	21.0445	1.39715	0.164088	0.92383	0.505452	-0.423703	1.43461	21.0734	1.08278	0.282198	0.895002	0	0
hilic	pm2.5	lur	1	0	92.522	275.067	0.0906219	-0.0245139	0.205758	23.2859	1.54979	0.122394	0.882898	0.0942632	-0.0291995	0.217726	23.3059	1.50655	0.133678	0.904786	0.00381458	-0.262254	0.269883	23.2418	0.0285367	0.977306	0.998705	0	0
hilic	pm2.5	lur	1	0	591.461	36.582	-0.488372	-1.10889	0.132142	16.5232	-1.54971	0.122414	0.882898	-0.242694	-1.00817	0.522779	16.4664	-0.625615	0.53236	0.961983	-0.973571	-2.07205	0.12491	16.6481	-1.76411	0.0815789	0.855884	0	0
hilic	pm2.5	lur	1	0	225.185	29.368	-0.132744	-0.301734	0.0362461	19.2709	-1.5467	0.123139	0.882898	-0.166591	-0.381084	0.0479018	19.29	-1.53256	0.127141	0.891976	-0.0261861	-0.31309	0.260718	19.2288	-0.18167	0.856307	0.980706	0	0
hilic	pm2.5	lur	1	0	533.911	84.075	-0.379593	-0.863177	0.103991	17.3468	-1.5456	0.123403	0.882898	-0.445593	-1.0549	0.163718	17.3312	-1.44304	0.150748	0.920753	-0.0781562	-0.882495	0.726183	17.3811	-0.193408	0.847136	0.980706	0	0
hilic	pm2.5	lur	1	0	140.904	73.212	0.0532382	-0.0146492	0.121126	26.3762	1.54413	0.123758	0.882898	0.0227745	-0.0584479	0.103997	26.3818	0.553287	0.580753	0.963422	0.123068	-0.020842	0.266978	26.3637	1.70218	0.0926539	0.855884	0	0
hilic	pm2.5	lur	1	0	127.112	23.104	-0.100604	-0.228921	0.0277139	19.7404	-1.54376	0.12385	0.882898	-0.134583	-0.295866	0.0267009	19.7754	-1.64656	0.101394	0.885563	-0.0291037	-0.253203	0.194995	19.6634	-0.258499	0.796694	0.97179	0	0
hilic	pm2.5	lur	1	0	267.195	28.349	-0.289897	-0.65989	0.080096	19.3549	-1.54277	0.124089	0.882898	-0.143051	-0.620311	0.334209	19.3451	-0.591444	0.554965	0.961983	-0.642702	-1.21268	-0.0727284	19.3765	-2.24443	0.0276024	0.855884	0	0
hilic	pm2.5	lur	1	0	145.122	25.706	-0.364267	-0.829388	0.100855	16.6631	-1.54207	0.124259	0.882898	-0.58895	-1.18419	0.00628648	16.581	-1.95239	0.0524428	0.883312	0.108983	-0.620074	0.83804	16.8438	0.29754	0.766835	0.965399	0	0
hilic	pm2.5	lur	1	0	183.111	106.825	0.540854	-0.15096	1.23267	16.6586	1.53937	0.124917	0.882898	0.531327	-0.310069	1.37272	16.6163	1.24606	0.214361	0.961983	0.639884	-0.672635	1.9524	16.7518	0.970389	0.334814	0.895002	0	0
hilic	pm2.5	lur	1	0	144.007	135.872	-0.245269	-0.559016	0.0684783	18.7623	-1.53927	0.124942	0.882898	-0.371837	-0.784415	0.0407416	18.7391	-1.77838	0.07703	0.883312	0.106297	-0.329984	0.542578	18.8136	0.484959	0.629047	0.93368	0	0
hilic	pm2.5	lur	1	0	478.293	45.197	0.145139	-0.0406172	0.330896	25.8898	1.53848	0.125133	0.882898	0.274538	0.048563	0.500513	25.8407	2.39729	0.0175403	0.883312	-0.147796	-0.486672	0.191079	25.998	-0.868108	0.387964	0.895002	0	0
hilic	pm2.5	lur	1	0	583.298	54.918	-0.336941	-0.768595	0.0947125	20.0874	-1.53699	0.125499	0.882898	-0.259069	-0.794439	0.2763	20.0641	-0.954863	0.340928	0.961983	-0.408052	-1.18641	0.370302	20.1388	-1.04349	0.299903	0.895002	0	0
hilic	pm2.5	lur	1	0	512.617	67.322	-0.28238	-0.644336	0.079575	15.9527	-1.53614	0.125706	0.882898	-0.53811	-0.977699	-0.0985216	16.0355	-2.41548	0.0167148	0.883312	0.346411	-0.302721	0.995543	15.7703	1.06221	0.291378	0.895002	0	0
hilic	pm2.5	lur	1	0	433.999	78.577	-0.353338	-0.806524	0.0998477	17.501	-1.5352	0.125936	0.882898	-0.174967	-0.708647	0.358712	17.6055	-0.646926	0.518504	0.961983	-0.652447	-1.50608	0.201185	17.2709	-1.52133	0.132168	0.855884	0	0
hilic	pm2.5	lur	1	0	335.925	67.737	-0.108032	-0.246638	0.030573	22.9671	-1.5347	0.126058	0.882898	-0.0538352	-0.222917	0.115247	23.0165	-0.628272	0.530622	0.961983	-0.201948	-0.464094	0.0601982	22.8584	-1.53337	0.12918	0.855884	0	0
hilic	pm2.5	lur	1	0	648.681	65.529	0.274337	-0.0776443	0.626318	21.5934	1.53467	0.126066	0.882898	0.279224	-0.138637	0.697086	21.6135	1.31856	0.188993	0.952101	0.318868	-0.372014	1.00975	21.5491	0.918664	0.361067	0.895002	0	0
hilic	pm2.5	lur	1	0	399.346	25.059	0.0973663	-0.0277047	0.222437	21.355	1.53286	0.126512	0.882898	0.117211	-0.0401124	0.274535	21.3588	1.47012	0.143275	0.916187	0.0570432	-0.166692	0.280778	21.3468	0.507481	0.613231	0.930467	0	0
hilic	pm2.5	lur	1	0	196.007	140.222	0.229626	-0.0665304	0.525782	21.0753	1.52669	0.12804	0.882898	0.195908	-0.184584	0.576399	21.0068	1.01598	0.311003	0.961983	0.243588	-0.216288	0.703465	21.2263	1.0543	0.294958	0.895002	0	0
hilic	pm2.5	lur	1	0	470.722	65.732	0.161623	-0.0469302	0.370177	21.3067	1.52594	0.128226	0.882898	0.174272	-0.0832001	0.431743	21.3042	1.3356	0.183368	0.952101	0.184386	-0.188131	0.556902	21.3121	0.985218	0.327524	0.895002	0	0
hilic	pm2.5	lur	1	0	177.119	107.541	-0.133115	-0.305064	0.0388343	20.8578	-1.52432	0.128629	0.882898	-0.169701	-0.389088	0.0496852	20.8872	-1.52635	0.128679	0.891976	-0.0691129	-0.340892	0.202666	20.7931	-0.506166	0.614149	0.93134	0	0
hilic	pm2.5	lur	1	0	284.128	38.349	-0.541801	-1.24244	0.158833	19.4504	-1.52265	0.129048	0.882898	-0.140718	-0.982599	0.701163	19.6267	-0.329821	0.741919	0.982115	-1.14872	-2.44267	0.14523	19.0619	-1.76704	0.0810827	0.855884	0	0
hilic	pm2.5	lur	1	0	566.888	84.173	0.0795262	-0.0233271	0.182379	28.3945	1.52245	0.129098	0.882898	0.0686499	-0.0635913	0.200891	28.4039	1.02436	0.307041	0.961983	0.112492	-0.0646582	0.289642	28.3739	1.26395	0.209964	0.855884	0	0
hilic	pm2.5	lur	1	0	139.039	275.12	0.146267	-0.0429604	0.335495	20.2031	1.522	0.129211	0.882898	0.20307	-0.0277469	0.433887	20.2814	1.73603	0.0842704	0.883312	0.116327	-0.234245	0.466898	20.0307	0.66047	0.510874	0.920114	0	0
hilic	pm2.5	lur	1	0	219.648	36.105	0.194604	-0.0573391	0.446548	17.4638	1.5209	0.129486	0.882898	0.311571	0.0146581	0.608485	17.4874	2.07065	0.0398191	0.883312	-0.0960606	-0.581003	0.388881	17.412	-0.394281	0.694436	0.944899	0	0
hilic	pm2.5	lur	1	0	166.951	58.751	-0.255833	-0.587646	0.0759794	18.6206	-1.51815	0.130177	0.882898	-0.361724	-0.669019	-0.0544285	18.3575	-2.32273	0.0213119	0.883312	0.0770696	-0.745623	0.899763	19.2	0.186464	0.852559	0.980706	0	0
hilic	pm2.5	lur	1	0	267.172	31.519	0.401127	-0.119221	0.921475	19.7478	1.51788	0.130245	0.882898	0.608835	-0.013429	1.2311	20.0509	1.93065	0.0550982	0.883312	-0.150731	-1.14853	0.847073	19.0803	-0.300681	0.764447	0.965399	0	0
hilic	pm2.5	lur	1	0	263.237	32.432	-0.135505	-0.311995	0.0409846	21.1024	-1.51178	0.131792	0.882898	-0.0507525	-0.266865	0.16536	21.1001	-0.463399	0.643638	0.970577	-0.268943	-0.588582	0.0506959	21.1076	-1.67475	0.0979365	0.855884	0	0
hilic	pm2.5	lur	1	0	499.11	102.343	0.30565	-0.0924961	0.703796	16.9092	1.51159	0.13184	0.882898	0.47361	-0.0373778	0.984599	17.0668	1.82889	0.0690705	0.883312	-0.1339	-0.75872	0.49092	16.5621	-0.426556	0.670862	0.942195	0	0
hilic	pm2.5	lur	1	0	274.881	69.562	0.048327	-0.0146341	0.111288	26.3229	1.51136	0.131897	0.882898	0.0833625	0.00709588	0.159629	26.3182	2.15682	0.0323459	0.883312	-0.0200628	-0.151422	0.111296	26.3333	-0.304005	0.761923	0.964868	0	0
hilic	pm2.5	lur	1	0	186.076	114.962	-0.174635	-0.402396	0.0531261	20.8191	-1.50974	0.13231	0.882898	-0.111745	-0.392182	0.168693	20.8401	-0.786266	0.432745	0.961983	-0.249239	-0.668229	0.169752	20.7728	-1.18403	0.239952	0.877673	0	0
hilic	pm2.5	lur	1	0	470.369	38.693	-0.212649	-0.490428	0.0651301	18.9993	-1.50735	0.13292	0.882898	-0.144626	-0.501319	0.212066	18.5713	-0.800078	0.42472	0.961983	-0.280377	-0.720519	0.159765	19.9419	-1.26794	0.208542	0.855884	0	0
hilic	pm2.5	lur	1	0	430.243	44.471	0.466049	-0.14361	1.07571	16.0865	1.5052	0.133471	0.882898	0.255406	-0.536823	1.04763	16.0503	0.636148	0.525488	0.961983	1.03166	0.0925447	1.97078	16.1664	2.18659	0.031731	0.855884	0	0
hilic	pm2.5	lur	1	0	430.913	84.235	0.066342	-0.0204674	0.153151	28.9929	1.50478	0.133581	0.882898	0.0711859	-0.0352012	0.177573	28.999	1.32033	0.188401	0.952101	0.0639732	-0.108127	0.236073	28.9794	0.739891	0.461559	0.911684	0	0
hilic	pm2.5	lur	1	0	155.991	277.188	0.136908	-0.0422993	0.316115	21.2264	1.50426	0.133713	0.882898	0.174136	-0.0540033	0.402276	21.2495	1.50614	0.133783	0.904786	0.0631093	-0.238599	0.364818	21.1754	0.416348	0.678284	0.944244	0	0
hilic	pm2.5	lur	1	0	400.29	40.927	-0.187335	-0.432758	0.0580882	20.2604	-1.50298	0.134043	0.882898	-0.0644997	-0.352954	0.223955	20.1518	-0.441223	0.659581	0.970577	-0.485136	-0.954712	-0.0155601	20.4996	-2.0564	0.043045	0.855884	0	0
hilic	pm2.5	lur	1	0	113.071	101.512	0.0913127	-0.0285256	0.211151	23.585	1.50033	0.134729	0.882898	0.0546438	-0.0910074	0.200295	23.5948	0.740295	0.460085	0.961983	0.163812	-0.0630501	0.390674	23.5633	1.43726	0.154594	0.855884	0	0
hilic	pm2.5	lur	1	0	199.101	42.407	0.0982447	-0.0307268	0.227216	24.0409	1.49991	0.134836	0.882898	0.171852	0.0229212	0.320783	24.0297	2.27692	0.0239678	0.883312	-0.0824098	-0.349199	0.184379	24.0658	-0.614838	0.540428	0.920494	0	0
hilic	pm2.5	lur	1	0	343.123	109.031	0.517484	-0.162571	1.19754	17.3758	1.49832	0.13525	0.882898	0.226202	-0.536111	0.988514	17.531	0.585519	0.558932	0.961983	1.46231	0.0228459	2.90177	17.0339	2.02204	0.0465573	0.855884	0	0
hilic	pm2.5	lur	1	0	224.865	66.032	0.0346606	-0.0109449	0.0802661	24.7627	1.49647	0.135729	0.882898	0.0281562	-0.0298656	0.086178	24.7637	0.957548	0.339575	0.961983	0.0771881	-0.0134078	0.167784	24.7604	1.69587	0.0938479	0.855884	0	0
hilic	pm2.5	lur	1	0	514.395	38.778	-0.211572	-0.490728	0.0675826	19.2115	-1.49233	0.136811	0.882898	-0.122184	-0.464285	0.219916	18.7815	-0.704757	0.481873	0.961983	-0.217712	-0.687831	0.252408	20.1584	-0.921772	0.359453	0.895002	0	0
hilic	pm2.5	lur	1	0	450.752	67.129	0.0478779	-0.015302	0.111058	26.5446	1.49213	0.136863	0.882898	0.0661945	-0.0160495	0.148439	26.5361	1.58817	0.114004	0.891976	0.00498413	-0.10839	0.118359	26.5633	0.0875034	0.930493	0.992091	0	0
hilic	pm2.5	lur	1	0	543.9	38.195	-0.228362	-0.530104	0.0733807	19.3034	-1.49018	0.137376	0.882898	-0.190599	-0.591877	0.21068	18.9108	-0.937242	0.34989	0.961983	-0.11104	-0.485686	0.263606	20.1681	-0.589941	0.556914	0.920494	0	0
hilic	pm2.5	lur	1	0	185.023	20.713	0.0759304	-0.0244126	0.176274	20.9563	1.48998	0.137428	0.882898	0.11256	-0.0136391	0.23876	20.9692	1.75997	0.0801111	0.883312	0.0311107	-0.142646	0.204867	20.928	0.356384	0.722503	0.953181	0	0
hilic	pm2.5	lur	1	0	157.097	84.185	0.111078	-0.0360562	0.258212	20.9519	1.4865	0.138344	0.882898	0.1228	-0.0526325	0.298232	20.9586	1.38123	0.16892	0.930604	0.0486397	-0.24463	0.341909	20.9371	0.330121	0.742182	0.95961	0	0
hilic	pm2.5	lur	1	0	183.078	74.103	0.0937763	-0.0305171	0.21807	27.7894	1.48558	0.138588	0.882898	0.128221	-0.0190357	0.275478	27.8081	1.71815	0.087488	0.883312	0.00958157	-0.241119	0.260282	27.7484	0.0760732	0.939553	0.992091	0	0
hilic	pm2.5	lur	1	0	124.039	291.268	0.343125	-0.111901	0.798152	17.2882	1.4848	0.138795	0.882898	0.259305	-0.350307	0.868917	17.4076	0.839335	0.402395	0.961983	0.697695	0.112095	1.28329	17.0252	2.37145	0.0201529	0.855884	0	0
hilic	pm2.5	lur	1	0	124.087	114.662	-0.174098	-0.405181	0.0569841	24.7782	-1.48347	0.139147	0.882898	-0.242056	-0.518278	0.034167	24.8339	-1.72916	0.0854959	0.883312	-0.003634	-0.460974	0.453706	24.6553	-0.015816	0.987421	0.999189	0	0
hilic	pm2.5	lur	1	0	295.942	84.104	0.07152	-0.0234152	0.166455	23.6227	1.48338	0.139172	0.882898	0.0909086	-0.0263917	0.208209	23.6426	1.52927	0.127953	0.891976	0.0239913	-0.158557	0.206539	23.5789	0.261594	0.794315	0.970036	0	0
hilic	pm2.5	lur	1	0	306.957	94.306	0.160699	-0.0527925	0.374191	20.9026	1.48212	0.139505	0.882898	0.21832	-0.0336357	0.470275	20.8953	1.70981	0.0890246	0.883312	0.00290196	-0.421655	0.427459	20.9188	0.0136052	0.989179	0.999189	0	0
hilic	pm2.5	lur	1	0	441.935	78.816	0.43178	-0.141925	1.00549	19.1911	1.48192	0.139559	0.882898	0.363574	-0.350395	1.07754	19.3589	1.00483	0.316329	0.961983	0.541977	-0.46446	1.54841	18.8216	1.07188	0.287039	0.895002	0	0
hilic	pm2.5	lur	1	0	314.277	36.97	0.312674	-0.10295	0.728297	18.5547	1.4813	0.139724	0.882898	0.502916	0.0298401	0.975992	18.6849	2.0977	0.0373284	0.883312	-0.0248886	-0.91041	0.860632	18.2678	-0.0559437	0.955528	0.996502	0	0
hilic	pm2.5	lur	1	0	543.398	37.771	-0.23559	-0.549064	0.0778836	20.5057	-1.47981	0.14012	0.882898	-0.212937	-0.626905	0.20103	20.1057	-1.01499	0.311471	0.961983	-0.155271	-0.58587	0.275329	21.3868	-0.717739	0.475035	0.919047	0	0
hilic	pm2.5	lur	1	0	210.888	69.976	0.0364444	-0.0120836	0.0849724	25.5233	1.47873	0.140409	0.882898	0.0531645	-0.0099398	0.116269	25.5203	1.66242	0.0981689	0.883312	0.00626089	-0.0881667	0.100688	25.53	0.131974	0.895341	0.992091	0	0
hilic	pm2.5	lur	1	0	120.011	232.194	-0.274291	-0.64017	0.0915874	16.9508	-1.47613	0.141104	0.882898	-0.478809	-0.871611	-0.0860064	16.7596	-2.40528	0.0171731	0.883312	0.175386	-0.642663	0.993436	17.3721	0.426743	0.670727	0.942195	0	0
hilic	pm2.5	lur	1	0	1168.74	83.609	0.0975672	-0.032694	0.227828	22.6327	1.47482	0.141456	0.882898	0.0626992	-0.10322	0.228619	22.6524	0.745665	0.456843	0.961983	0.173123	-0.052085	0.398331	22.5893	1.5301	0.129985	0.855884	0	0
hilic	pm2.5	lur	1	0	516.374	39.896	-0.405043	-0.945908	0.135823	18.668	-1.47456	0.141527	0.882898	-0.370272	-1.07955	0.339003	18.5692	-1.03011	0.30434	0.961983	-0.417379	-1.23268	0.397927	18.8856	-1.01897	0.311329	0.895002	0	0
hilic	pm2.5	lur	1	0	322.81	69.374	0.0418243	-0.0141319	0.0977804	27.3708	1.47174	0.142287	0.882898	0.0469393	-0.0272067	0.121085	27.3684	1.24919	0.213219	0.961983	0.0263709	-0.0725549	0.125297	27.3762	0.530598	0.597185	0.929487	0	0
hilic	pm2.5	lur	1	0	384.259	37.134	0.290623	-0.0982582	0.679503	19.0747	1.47151	0.142348	0.882898	0.597791	0.158954	1.03663	19.0933	2.68797	0.00786333	0.883312	-0.459435	-1.25343	0.334561	19.0337	-1.15174	0.252899	0.883243	0	0
hilic	pm2.5	lur	1	0	508.711	67.545	0.0403181	-0.0136988	0.094335	26.1428	1.46967	0.142845	0.882898	0.0594136	-0.008613	0.12744	26.1434	1.7234	0.0865341	0.883312	0.00244242	-0.106916	0.111801	26.1414	0.0444546	0.964654	0.998705	0	0
hilic	pm2.5	lur	1	0	182.058	73.114	-0.649333	-1.52087	0.222207	22.2295	-1.467	0.14357	0.882898	-0.462844	-1.53548	0.609794	22.3681	-0.851451	0.39565	0.961983	-0.925915	-2.51152	0.659692	21.924	-1.16232	0.248604	0.88115	0	0
hilic	pm2.5	lur	1	0	326.805	68.896	0.0417286	-0.014281	0.0977381	26.6795	1.46697	0.143578	0.882898	0.0492841	-0.0249584	0.123527	26.6754	1.30988	0.191905	0.952101	0.0225679	-0.076347	0.121483	26.6884	0.454129	0.650981	0.937675	0	0
hilic	pm2.5	lur	1	0	447.059	123.957	0.346396	-0.118656	0.811448	16.9285	1.46663	0.14367	0.882898	0.133683	-0.471205	0.738571	16.7983	0.436094	0.663291	0.970577	0.822274	0.125598	1.51895	17.2153	2.34929	0.0213076	0.855884	0	0
hilic	pm2.5	lur	1	0	335.221	32.182	-0.217183	-0.50882	0.0744542	19.4834	-1.46634	0.143751	0.882898	-0.192123	-0.568055	0.183809	19.6002	-1.00843	0.3146	0.961983	-0.248232	-0.718443	0.221979	19.2262	-1.05079	0.296559	0.895002	0	0
hilic	pm2.5	lur	1	0	516.743	66.575	0.0709212	-0.0243263	0.166169	24.6442	1.46613	0.143806	0.882898	0.128058	0.0145046	0.241611	24.6439	2.22528	0.0273044	0.883312	-0.0583572	-0.252571	0.135857	24.6448	-0.598087	0.551492	0.920494	0	0
hilic	pm2.5	lur	1	0	276.878	68.344	0.0429099	-0.0147511	0.100571	25.6875	1.4653	0.144034	0.882898	0.0645827	-0.0057204	0.134886	25.6878	1.81267	0.0715483	0.883312	-0.0001463	-0.121768	0.121476	25.6869	-0.0023935	0.998096	0.999568	0	0
hilic	pm2.5	lur	1	0	646.472	38.851	-0.204111	-0.478555	0.0703343	18.7884	-1.46441	0.144277	0.882898	-0.220091	-0.550773	0.110591	18.5012	-1.31332	0.190748	0.952101	-0.110008	-0.626918	0.406902	19.4211	-0.423605	0.673005	0.943666	0	0
hilic	pm2.5	lur	1	0	306.243	269.921	-0.132787	-0.311354	0.0457798	19.3088	-1.46422	0.144328	0.882898	-0.0392284	-0.255432	0.176976	19.359	-0.358027	0.720743	0.974384	-0.323097	-0.664658	0.0184634	19.1983	-1.88285	0.0634013	0.855884	0	0
hilic	pm2.5	lur	1	0	458.332	40.419	-0.243669	-0.571387	0.0840494	19.2148	-1.46403	0.144379	0.882898	-0.184562	-0.5558	0.186676	19.0925	-0.981	0.32791	0.961983	-0.402395	-1.06864	0.263853	19.4841	-1.20217	0.232887	0.868469	0	0
hilic	pm2.5	lur	1	0	155.118	28.788	-0.281026	-0.659376	0.0973234	18.66	-1.46253	0.14479	0.882898	0.127728	-0.322095	0.577552	18.6841	0.560303	0.575969	0.963422	-1.25443	-1.92067	-0.588194	18.6068	-3.74772	0.00033797	0.458959	0	0
hilic	pm2.5	lur	1	0	111.042	138.579	0.402248	-0.140302	0.944798	17.153	1.45984	0.145527	0.882898	0.32222	-0.334667	0.979106	17.2854	0.967921	0.334383	0.961983	0.500191	-0.482847	1.48323	16.8615	1.01278	0.314256	0.895002	0	0
hilic	pm2.5	lur	1	0	364.93	83.46	0.0642137	-0.0224179	0.150845	23.4541	1.45949	0.145622	0.882898	0.0671777	-0.0407003	0.175056	23.4715	1.22877	0.220763	0.961983	0.0648034	-0.100654	0.230261	23.4159	0.779581	0.437966	0.905711	0	0
hilic	pm2.5	lur	1	0	172.17	27.618	0.265364	-0.0931584	0.623887	19.3786	1.45739	0.146201	0.882898	0.197042	-0.274435	0.668519	19.3533	0.824662	0.410655	0.961983	0.363427	-0.158137	0.884991	19.4343	1.38695	0.169359	0.855884	0	0
hilic	pm2.5	lur	1	0	492.364	38.044	-0.248582	-0.584887	0.0877233	20.0715	-1.45542	0.146747	0.882898	-0.183737	-0.620885	0.25341	19.65	-0.829368	0.407995	0.961983	-0.202457	-0.677194	0.27228	20.9999	-0.848847	0.398531	0.901818	0	0
hilic	pm2.5	lur	1	0	358.295	39.027	-0.199218	-0.468784	0.0703475	22.8177	-1.45518	0.146813	0.882898	-0.212115	-0.512027	0.0877967	22.9481	-1.39558	0.164559	0.92383	-0.298184	-0.864468	0.268101	22.5303	-1.04809	0.297792	0.895002	0	0
hilic	pm2.5	lur	1	0	382.295	38.17	-0.392074	-0.922732	0.138583	16.9674	-1.4548	0.146916	0.882898	-0.511869	-1.17866	0.154923	17.2133	-1.51477	0.131585	0.904786	-0.0798312	-0.973537	0.813874	16.4258	-0.177799	0.859336	0.982719	0	0
hilic	pm2.5	lur	1	0	287.204	45.365	0.199018	-0.070551	0.468586	24.4108	1.45369	0.147223	0.882898	0.0841091	-0.257478	0.425696	24.288	0.48587	0.627651	0.969915	0.396458	-0.0583058	0.851222	24.6813	1.73525	0.0865957	0.855884	0	0
hilic	pm2.5	lur	1	0	282.823	66.836	0.0391517	-0.0138899	0.0921933	23.5593	1.4534	0.147305	0.882898	0.0164225	-0.0477517	0.0805967	23.5533	0.504959	0.614205	0.967904	0.114118	0.00364994	0.224587	23.5724	2.05621	0.0430639	0.855884	0	0
hilic	pm2.5	lur	1	0	229.118	86.126	0.152336	-0.0540509	0.358724	21.4483	1.45335	0.147317	0.882898	0.191529	-0.0649506	0.44801	21.4223	1.47353	0.142354	0.916187	0.0410522	-0.332422	0.414526	21.5054	0.218789	0.827378	0.980706	0	0
hilic	pm2.5	lur	1	0	566.67	67.811	0.0440035	-0.0156429	0.10365	25.7022	1.45263	0.14752	0.882898	0.0605423	-0.0150002	0.136085	25.7009	1.58141	0.115539	0.891976	0.00703845	-0.109171	0.123248	25.7052	0.120556	0.904349	0.992091	0	0
hilic	pm2.5	lur	1	0	238.12	38.835	0.0884597	-0.0314987	0.208418	24.9204	1.452	0.147694	0.882898	0.116218	-0.0304435	0.262879	24.9418	1.56363	0.11966	0.891976	0.0231602	-0.203397	0.249717	24.8734	0.203477	0.839285	0.980706	0	0
hilic	pm2.5	lur	1	0	167.089	62.035	-0.0575222	-0.135553	0.0205081	28.1189	-1.45152	0.147827	0.882898	-0.0585009	-0.148328	0.031326	28.1573	-1.28509	0.200412	0.957234	-0.0426322	-0.206606	0.121342	28.0343	-0.517504	0.60625	0.92951	0	0
hilic	pm2.5	lur	1	0	384.274	38.008	-0.225002	-0.530368	0.0803639	21.1177	-1.45083	0.148019	0.882898	-0.253659	-0.569922	0.062605	21.2559	-1.58263	0.115262	0.891976	-0.0766462	-0.809369	0.656077	20.8132	-0.20821	0.835601	0.980706	0	0
hilic	pm2.5	lur	1	0	466.638	66.505	0.19235	-0.0689283	0.453629	20.466	1.44957	0.148369	0.882898	0.131326	-0.196912	0.459563	20.3337	0.789477	0.430872	0.961983	0.486812	0.0454541	0.92817	20.7573	2.19543	0.0310667	0.855884	0	0
hilic	pm2.5	lur	1	0	152.128	38.337	0.280662	-0.101191	0.662516	19.9585	1.44723	0.149023	0.882898	0.3301	-0.152478	0.812678	20.0928	1.34976	0.178789	0.945827	0.00401963	-0.616829	0.624868	19.6626	0.012887	0.98975	0.999317	0	0
hilic	pm2.5	lur	1	0	324.289	30.371	-0.140105	-0.330795	0.0505854	19.4291	-1.44669	0.149174	0.882898	-0.0894112	-0.330293	0.15147	19.4545	-0.73243	0.464859	0.961983	-0.197763	-0.51782	0.122293	19.3734	-1.2299	0.222385	0.863414	0	0
hilic	pm2.5	lur	1	0	562.633	68.487	0.0797507	-0.0288633	0.188365	23.9268	1.44577	0.149432	0.882898	0.0560202	-0.0495846	0.161625	23.9501	1.04674	0.296622	0.961983	0.167524	-0.114473	0.449521	23.8756	1.18245	0.240573	0.877873	0	0
hilic	pm2.5	lur	1	0	530.767	66.789	0.144808	-0.0525636	0.34218	23.0894	1.44464	0.14975	0.882898	0.241443	0.0307263	0.45216	23.0775	2.26096	0.0249585	0.883312	-0.0581659	-0.515155	0.398824	23.1157	-0.253345	0.80066	0.973407	0	0
hilic	pm2.5	lur	1	0	269.175	28.249	0.148391	-0.0539839	0.350766	18.7753	1.44378	0.14999	0.882898	0.176444	-0.0605753	0.413464	18.79	1.46893	0.143597	0.916187	0.0763131	-0.342848	0.495474	18.743	0.362384	0.718033	0.9517	0	0
hilic	pm2.5	lur	1	0	317.251	41.652	0.188112	-0.0692387	0.445462	23.7925	1.43927	0.151263	0.882898	0.0351523	-0.29056	0.360865	23.7073	0.21296	0.831599	0.988245	0.551311	0.133582	0.969041	23.9803	2.62695	0.0103447	0.855884	0	0
hilic	pm2.5	lur	1	0	480.614	66.552	0.486173	-0.179284	1.15163	15.0053	1.43854	0.15147	0.882898	0.0301859	-0.777478	0.83785	14.9908	0.0737481	0.941293	0.990901	1.64136	0.447367	2.83536	15.0372	2.73622	0.00767254	0.855884	0	0
hilic	pm2.5	lur	1	0	631.338	46.615	0.422623	-0.156375	1.00162	16.2305	1.43723	0.151841	0.882898	0.21598	-0.477377	0.909338	16.0039	0.61466	0.539555	0.961983	0.76469	-0.31729	1.84667	16.7297	1.40675	0.163423	0.855884	0	0
hilic	pm2.5	lur	1	0	177.123	106.115	-0.107529	-0.254989	0.0399306	23.1957	-1.43583	0.152238	0.882898	-0.109169	-0.290698	0.07236	23.2708	-1.18668	0.23692	0.961983	-0.110927	-0.374334	0.15248	23.0304	-0.838221	0.404435	0.903327	0	0
hilic	pm2.5	lur	1	0	276.789	67.826	0.0775822	-0.0288526	0.184017	21.5966	1.43526	0.152402	0.882898	0.0213072	-0.107309	0.149923	21.5861	0.326896	0.744126	0.982258	0.226037	0.0229548	0.42912	21.6196	2.21543	0.0296093	0.855884	0	0
hilic	pm2.5	lur	1	0	92.981	73.884	0.0928253	-0.0345552	0.220206	22.0417	1.43488	0.15251	0.882898	0.0843177	-0.0655315	0.234167	22.048	1.11031	0.268349	0.961983	0.0545806	-0.203269	0.312431	22.0277	0.421329	0.674659	0.944244	0	0
hilic	pm2.5	lur	1	0	282.91	20.944	0.112144	-0.0417565	0.266045	19.0068	1.43479	0.152536	0.882898	0.142807	-0.0514931	0.337108	19.0016	1.45029	0.148718	0.920753	0.0093181	-0.256246	0.274882	19.0181	0.0698407	0.944497	0.992536	0	0
hilic	pm2.5	lur	1	0	221.07	102.078	0.25342	-0.09438	0.60122	19.1163	1.4347	0.152559	0.882898	0.274029	-0.149586	0.697644	19.1426	1.27645	0.203442	0.957234	0.325339	-0.308506	0.959184	19.0584	1.02165	0.310063	0.895002	0	0
hilic	pm2.5	lur	1	0	369.283	39.355	0.230272	-0.0858454	0.54639	22.1657	1.43431	0.152671	0.882898	-0.001261	-0.397851	0.395329	22.0859	-0.0062741	0.995001	0.997204	0.690685	0.170158	1.21121	22.3415	2.64111	0.00995627	0.855884	0	0
hilic	pm2.5	lur	1	0	1160.28	67.582	0.402822	-0.150897	0.956542	18.8041	1.43244	0.153207	0.882898	0.251785	-0.351188	0.854757	18.7407	0.823967	0.411049	0.961983	0.709167	-0.540199	1.95853	18.9436	1.12982	0.261971	0.886342	0	0
hilic	pm2.5	lur	1	0	579.928	38.188	-0.266265	-0.632445	0.0999145	18.0353	-1.43176	0.153399	0.882898	-0.381426	-0.900738	0.137887	17.6442	-1.4493	0.148993	0.920753	-0.0163097	-0.300559	0.26794	18.8966	-0.114208	0.909363	0.992091	0	0
hilic	pm2.5	lur	1	0	259.937	209.832	-0.337467	-0.801604	0.12667	17.4263	-1.43165	0.153432	0.882898	-0.312844	-0.816376	0.190688	17.4392	-1.22597	0.221813	0.961983	-0.322045	-1.32518	0.681092	17.3979	-0.639008	0.524666	0.920494	0	0
hilic	pm2.5	lur	1	0	150.117	114.386	0.311854	-0.117076	0.740784	19.0729	1.43158	0.153451	0.882898	0.368642	-0.158497	0.895781	18.9581	1.37993	0.169319	0.930913	0.126988	-0.660693	0.914668	19.3258	0.320894	0.749138	0.961695	0	0
hilic	pm2.5	lur	1	0	429.325	39.605	-0.4359	-1.03567	0.163874	16.3552	-1.43104	0.153607	0.882898	0.196974	-0.419613	0.81356	16.779	0.630365	0.529255	0.961983	-1.71802	-3.06567	-0.370375	15.4219	-2.53748	0.013133	0.855884	0	0
hilic	pm2.5	lur	1	0	127.05	107.205	0.191091	-0.0718477	0.454029	19.4504	1.43099	0.15362	0.882898	0.0750691	-0.236654	0.386792	19.4734	0.475194	0.635225	0.970577	0.44328	-0.0783563	0.964915	19.3999	1.69146	0.0946908	0.855884	0	0
hilic	pm2.5	lur	1	0	1110.26	67.518	-0.471703	-1.12094	0.17753	17.305	-1.4306	0.153731	0.882898	-0.644551	-1.42653	0.137427	17.0446	-1.62645	0.105603	0.891976	-0.0706977	-1.29789	1.1565	17.8784	-0.114668	0.908999	0.992091	0	0
hilic	pm2.5	lur	1	0	510.709	67.242	0.053511	-0.0201874	0.12721	25.7682	1.42967	0.153998	0.882898	0.0622068	-0.025292	0.149706	25.7523	1.40286	0.162382	0.92383	0.0276478	-0.129162	0.184457	25.8033	0.350944	0.726564	0.954965	0	0
hilic	pm2.5	lur	1	0	153.982	291.476	0.232082	-0.0876275	0.551792	19.3869	1.42934	0.154092	0.882898	0.200242	-0.203266	0.603751	19.3856	0.979223	0.328784	0.961983	0.359441	-0.181681	0.900562	19.3899	1.32216	0.189931	0.855884	0	0
hilic	pm2.5	lur	1	0	586.728	66.105	0.0962333	-0.0363723	0.228839	24.1791	1.42894	0.154207	0.882898	0.205485	0.0569238	0.354046	24.1703	2.72931	0.00697678	0.883312	-0.134536	-0.42031	0.151237	24.1986	-0.93706	0.351583	0.895002	0	0
hilic	pm2.5	lur	1	0	271.026	119.808	0.376036	-0.142245	0.894318	17.63	1.42861	0.154302	0.882898	0.203797	-0.408511	0.816105	17.5424	0.656758	0.512175	0.961983	0.765116	-0.249112	1.77934	17.8228	1.50156	0.137197	0.855884	0	0
hilic	pm2.5	lur	1	0	375.086	102.228	0.338008	-0.128059	0.804076	15.5862	1.428	0.154477	0.882898	0.4407	-0.166469	1.04787	15.49	1.43223	0.153813	0.923119	0.199744	-0.504889	0.904377	15.7981	0.564237	0.574191	0.925369	0	0
hilic	pm2.5	lur	1	0	388.342	28.967	-0.19965	-0.475655	0.0763558	19.1569	-1.4243	0.155545	0.882898	-0.129908	-0.485563	0.225748	19.2803	-0.720747	0.472	0.961983	-0.443313	-0.882784	-0.0038417	18.8851	-2.00785	0.0480778	0.855884	0	0
hilic	pm2.5	lur	1	0	316.983	82.458	-0.342163	-0.815211	0.130886	20.9968	-1.42422	0.155567	0.882898	-0.595849	-1.14706	-0.0446377	21.0211	-2.13303	0.0342775	0.883312	0.223806	-0.734621	1.18223	20.9433	0.464796	0.643356	0.937675	0	0
hilic	pm2.5	lur	1	0	198.098	46.183	0.0802787	-0.0307158	0.191273	28.3355	1.42413	0.155594	0.882898	0.133405	0.00229983	0.26451	28.3229	2.00785	0.0461553	0.883312	-0.0598772	-0.286061	0.166307	28.3632	-0.526926	0.599721	0.92951	0	0
hilic	pm2.5	lur	1	0	133.065	278.227	-0.208618	-0.497553	0.0803164	20.1066	-1.42169	0.156302	0.882898	-0.149672	-0.496018	0.196675	20.2228	-0.852721	0.394947	0.961983	-0.351136	-0.913199	0.210927	19.8506	-1.24349	0.217366	0.857735	0	0
hilic	pm2.5	lur	1	0	196.126	30.459	0.111006	-0.0428814	0.264893	19.5976	1.42035	0.156691	0.882898	0.166651	-0.0221461	0.355448	19.6404	1.74177	0.0832572	0.883312	-0.0467155	-0.335783	0.242352	19.5035	-0.321671	0.748552	0.961695	0	0
hilic	pm2.5	lur	1	0	382.766	68.554	0.0407954	-0.0157842	0.097375	27.5683	1.41972	0.156873	0.882898	0.0470871	-0.0269513	0.121125	27.559	1.25494	0.211128	0.961983	0.0207242	-0.0826177	0.124066	27.5889	0.399165	0.690849	0.944899	0	0
hilic	pm2.5	lur	1	0	312.159	40.091	-0.381795	-0.911826	0.148237	22.9372	-1.41834	0.157276	0.882898	-0.238294	-0.854786	0.378199	22.9909	-0.762716	0.446631	0.961983	-0.667731	-1.69614	0.360684	22.8191	-1.29236	0.2	0.855884	0	0
hilic	pm2.5	lur	1	0	106.03	97.973	-0.39532	-0.944484	0.153843	17.6928	-1.41742	0.157544	0.882898	-0.549696	-1.10509	0.00569447	17.6019	-1.953	0.0523701	0.883312	-0.116277	-1.45216	1.21961	17.893	-0.173251	0.862897	0.98273	0	0
hilic	pm2.5	lur	1	0	1179.78	85	0.166404	-0.0649765	0.397784	22.4084	1.41608	0.157935	0.882898	-0.0240024	-0.306155	0.25815	22.4126	-0.167861	0.866881	0.989597	0.63301	0.222711	1.04331	22.399	3.07086	0.00292626	0.855884	0	0
hilic	pm2.5	lur	1	0	163.116	72.993	-0.0816491	-0.195221	0.0319229	27.4942	-1.41557	0.158084	0.882898	-0.100062	-0.23349	0.0333663	27.4565	-1.47979	0.140678	0.915981	-0.0364056	-0.274476	0.201665	27.5773	-0.304378	0.76164	0.964868	0	0
hilic	pm2.5	lur	1	0	414.321	38.391	-0.437984	-1.04772	0.171755	18.0855	-1.41438	0.158434	0.882898	-0.906007	-1.62537	-0.186646	18.2441	-2.48521	0.0138602	0.883312	0.457671	-0.715317	1.63066	17.7364	0.776623	0.4397	0.905711	0	0
hilic	pm2.5	lur	1	0	245.042	232.059	0.341268	-0.134062	0.816597	19.2087	1.41368	0.158639	0.882898	0.544897	-0.0067035	1.0965	19.217	1.94925	0.0528195	0.883312	-0.0228415	-0.981036	0.935353	19.1906	-0.0474485	0.962276	0.998705	0	0
hilic	pm2.5	lur	1	0	420.885	77.371	0.0473094	-0.0187011	0.11332	26.3439	1.41119	0.15937	0.882898	0.0519963	-0.0309256	0.134918	26.362	1.23732	0.217581	0.961983	0.0252179	-0.103385	0.15382	26.3039	0.390311	0.697357	0.945635	0	0
hilic	pm2.5	lur	1	0	143.959	21.721	0.0653109	-0.0258564	0.156478	20.7911	1.41058	0.15955	0.882898	0.0696181	-0.0480911	0.187327	20.8168	1.16705	0.244734	0.961983	0.0159262	-0.136773	0.168625	20.7344	0.207599	0.836076	0.980706	0	0
hilic	pm2.5	lur	1	0	307.263	24.842	0.118912	-0.0473188	0.285142	19.2232	1.40853	0.160156	0.882898	0.116971	-0.0925526	0.326495	19.1984	1.1016	0.272107	0.961983	0.132211	-0.154777	0.419199	19.2777	0.916971	0.361948	0.895002	0	0
hilic	pm2.5	lur	1	0	190.912	63.745	0.0924386	-0.037007	0.221884	23.1334	1.4061	0.160874	0.882898	0.0664138	-0.0924609	0.225289	23.1396	0.824863	0.410541	0.961983	0.139466	-0.0970807	0.376014	23.1197	1.17355	0.2441	0.877873	0	0
hilic	pm2.5	lur	1	0	335	112.144	-0.256634	-0.616611	0.103344	16.7257	-1.40375	0.161574	0.882898	-0.260234	-0.693674	0.173205	16.6915	-1.18471	0.237692	0.961983	-0.0724297	-0.694885	0.550025	16.801	-0.231611	0.817439	0.980706	0	0
hilic	pm2.5	lur	1	0	220.081	121.44	0.209935	-0.0848748	0.504744	16.1609	1.40215	0.16205	0.882898	0.20917	-0.138454	0.556794	16.2094	1.18732	0.236666	0.961983	0.421385	-0.145482	0.988253	16.0542	1.47961	0.142952	0.855884	0	0
hilic	pm2.5	lur	1	0	452.277	43.501	0.224979	-0.0912086	0.541167	20.6067	1.40103	0.162383	0.882898	0.422393	0.125475	0.719311	20.9599	2.80711	0.00554996	0.883312	-0.116322	-0.882371	0.649727	19.8287	-0.302242	0.763262	0.964868	0	0
hilic	pm2.5	lur	1	0	266.123	110.674	-0.323953	-0.780489	0.132582	17.7954	-1.3972	0.16353	0.882898	-0.443139	-0.964175	0.0778965	17.9851	-1.67823	0.0950382	0.883312	-0.141654	-1.09724	0.813933	17.3777	-0.295059	0.768723	0.965399	0	0
hilic	pm2.5	lur	1	0	234.024	63.463	-0.161114	-0.38825	0.0660218	22.2176	-1.39669	0.163685	0.882898	-0.0605382	-0.331252	0.210175	22.3518	-0.441263	0.659552	0.970577	-0.355472	-0.794665	0.0837212	21.922	-1.61102	0.111164	0.855884	0	0
hilic	pm2.5	lur	1	0	1038.66	51.615	-0.303921	-0.732613	0.124771	21.1252	-1.39594	0.16391	0.882898	-0.22411	-0.684174	0.235953	21.2209	-0.961219	0.337731	0.961983	-0.445089	-1.42898	0.538803	20.9145	-0.90043	0.370628	0.895002	0	0
hilic	pm2.5	lur	1	0	292.852	64.974	0.0678445	-0.0279575	0.163647	22.526	1.39441	0.16437	0.882898	0.0156157	-0.0881008	0.119332	22.509	0.297093	0.766738	0.986872	0.246121	0.0257659	0.466475	22.5633	2.22319	0.0290603	0.855884	0	0
hilic	pm2.5	lur	1	0	118.078	76.037	0.220594	-0.0909817	0.532169	22.1159	1.39406	0.164476	0.882898	0.197738	-0.15241	0.547887	22.0665	1.11434	0.26662	0.961983	0.360954	-0.32126	1.04317	22.2249	1.05313	0.295492	0.895002	0	0
hilic	pm2.5	lur	1	0	86.665	60.234	-0.230396	-0.555873	0.0950813	20.739	-1.39382	0.16455	0.882898	-0.141911	-0.498948	0.215125	20.8264	-0.784301	0.433895	0.961983	-0.333811	-1.03748	0.369854	20.5465	-0.944246	0.347922	0.895002	0	0
hilic	pm2.5	lur	1	0	436.342	29.32	0.155424	-0.0642338	0.375082	18.5975	1.39323	0.164727	0.882898	0.132571	-0.144648	0.409791	18.7354	0.943636	0.346621	0.961983	0.218596	-0.148933	0.586125	18.2937	1.18386	0.240017	0.877673	0	0
hilic	pm2.5	lur	1	0	287.07	86.008	0.472982	-0.195578	1.14154	19.8201	1.39301	0.164792	0.882898	0.792636	0.0181248	1.56715	19.7798	2.01941	0.0449282	0.883312	-0.293114	-1.60562	1.01939	19.9089	-0.444514	0.657886	0.939554	0	0
hilic	pm2.5	lur	1	0	214.023	130.222	0.231196	-0.0956699	0.558063	21.0066	1.39271	0.164882	0.882898	0.248921	-0.180065	0.677907	21.0589	1.14498	0.253739	0.961983	0.159514	-0.305224	0.624252	20.8915	0.68319	0.496486	0.920114	0	0
hilic	pm2.5	lur	1	0	1044.8	85.528	-0.358068	-0.864602	0.148466	20.4611	-1.3919	0.165129	0.882898	-0.619243	-1.19349	-0.0449927	20.5169	-2.12784	0.0347119	0.883312	0.263641	-0.805922	1.3332	20.3381	0.490633	0.625046	0.93368	0	0
hilic	pm2.5	lur	1	0	192.91	63.732	0.362979	-0.150552	0.87651	18.2326	1.39176	0.165169	0.882898	0.0551659	-0.520415	0.630746	17.983	0.189122	0.85021	0.989597	0.920668	-0.173329	2.01466	18.7822	1.67509	0.0978709	0.855884	0	0
hilic	pm2.5	lur	1	0	220.118	41.476	-0.245753	-0.59346	0.101953	21.1833	-1.39167	0.165197	0.882898	-0.304015	-0.721293	0.113264	21.1902	-1.43763	0.152276	0.92095	-0.180878	-0.847618	0.485861	21.1682	-0.539983	0.590728	0.927631	0	0
hilic	pm2.5	lur	1	0	206.894	71.399	0.0345072	-0.0143186	0.0833329	28.8107	1.39159	0.165222	0.882898	0.0528306	-0.0094819	0.115143	28.812	1.67297	0.0960699	0.883312	0.0014979	-0.0945169	0.0975127	28.8078	0.0310523	0.975306	0.998705	0	0
hilic	pm2.5	lur	1	0	538.574	66.686	0.467315	-0.195266	1.1299	14.8331	1.38874	0.166086	0.882898	-0.0045142	-0.77398	0.764952	14.7123	-0.0115764	0.990776	0.996575	1.5725	0.235195	2.90981	15.0993	2.34051	0.0217808	0.855884	0	0
hilic	pm2.5	lur	1	0	362.926	83.308	0.0505067	-0.0211374	0.122151	28.9816	1.3881	0.166282	0.882898	0.0517929	-0.0379271	0.141513	28.986	1.13909	0.256178	0.961983	0.056931	-0.082444	0.196306	28.9718	0.813044	0.418636	0.905711	0	0
hilic	pm2.5	lur	1	0	222.868	65.726	0.0335765	-0.0140586	0.0812116	25.3575	1.3879	0.166341	0.882898	0.0314412	-0.0295666	0.092449	25.3532	1.01693	0.310551	0.961983	0.0641876	-0.0279468	0.156322	25.367	1.38669	0.169436	0.855884	0	0
hilic	pm2.5	lur	1	0	601.519	36.233	0.310696	-0.130234	0.751626	18.9701	1.38745	0.16648	0.882898	0.32475	-0.227056	0.876557	19.161	1.16129	0.247061	0.961983	0.235939	-0.531074	1.00295	18.5496	0.612276	0.542113	0.920494	0	0
hilic	pm2.5	lur	1	0	105.074	77.727	-0.0957768	-0.231734	0.0401804	21.627	-1.3871	0.166584	0.882898	-0.134548	-0.30039	0.0312943	21.6063	-1.60088	0.111156	0.891976	-0.0799347	-0.333757	0.173887	21.6728	-0.62684	0.532571	0.920494	0	0
hilic	pm2.5	lur	1	0	390.798	67.798	0.0387437	-0.0163352	0.0938227	26.6633	1.38506	0.167209	0.882898	0.0696007	0.0012639	0.137937	26.6607	2.00973	0.0459537	0.883312	-0.0250346	-0.138216	0.0881466	26.6688	-0.440267	0.660946	0.941473	0	0
hilic	pm2.5	lur	1	0	730.593	45.706	-0.567277	-1.37401	0.239458	18.4676	-1.38457	0.167357	0.882898	-0.100006	-1.04691	0.846895	18.5767	-0.2084	0.835152	0.988245	-1.73336	-3.31301	-0.153717	18.2275	-2.18414	0.0319176	0.855884	0	0
hilic	pm2.5	lur	1	0	142.991	285.9	0.168485	-0.0714396	0.40841	19.8529	1.38273	0.16792	0.882898	0.00627075	-0.202916	0.215457	19.8711	0.0591513	0.952897	0.991368	0.544782	-0.109909	1.19947	19.8128	1.65629	0.101629	0.855884	0	0
hilic	pm2.5	lur	1	0	354.285	32.966	-0.115458	-0.280184	0.0492678	21.2625	-1.38011	0.168725	0.882898	-0.0597815	-0.265835	0.146272	21.2749	-0.572485	0.567708	0.961983	-0.235388	-0.51774	0.0469647	21.235	-1.65937	0.101006	0.855884	0	0
hilic	pm2.5	lur	1	0	365.105	100.434	0.166619	-0.0711317	0.40437	23.8154	1.37992	0.168783	0.882898	0.0835209	-0.216337	0.383379	23.9367	0.549613	0.583266	0.963422	0.344616	-0.0650019	0.754233	23.5483	1.67458	0.0979701	0.855884	0	0
hilic	pm2.5	lur	1	0	203.179	38.368	-0.277642	-0.673851	0.118568	16.953	-1.37978	0.168826	0.882898	-0.153609	-0.651365	0.344146	17.0271	-0.608948	0.543327	0.961983	-0.558684	-1.25171	0.134345	16.7897	-1.60459	0.112573	0.855884	0	0
hilic	pm2.5	lur	1	0	286.958	270.667	0.153213	-0.0654634	0.37189	19.9392	1.37957	0.16889	0.882898	0.315784	0.0567005	0.574867	19.9852	2.40507	0.0171826	0.883312	-0.17759	-0.605112	0.249932	19.8377	-0.826819	0.410829	0.905711	0	0
hilic	pm2.5	lur	1	0	658.958	38.562	-0.359625	-0.873346	0.154097	17.1218	-1.37839	0.169254	0.882898	-0.365672	-1.07928	0.347938	16.7126	-1.01114	0.313309	0.961983	-0.0036433	-0.402687	0.3954	18.023	-0.0181729	0.985547	0.999158	0	0
hilic	pm2.5	lur	1	0	162.112	72.995	-0.0687896	-0.167154	0.0295743	31.3087	-1.37701	0.169679	0.882898	-0.080059	-0.194153	0.0340345	31.2831	-1.38461	0.167886	0.928672	-0.0333799	-0.245963	0.179203	31.3651	-0.312541	0.755453	0.964748	0	0
hilic	pm2.5	lur	1	0	175.148	36.667	-0.220541	-0.536031	0.0949487	16.9573	-1.37643	0.169858	0.882898	-0.286021	-0.689791	0.117748	17.077	-1.39779	0.163895	0.92383	-0.0741005	-0.59139	0.443189	16.6936	-0.285127	0.776293	0.965845	0	0
hilic	pm2.5	lur	1	0	227.027	59.736	-0.399299	-0.970521	0.171923	20.3251	-1.3764	0.169868	0.882898	-0.763171	-1.37428	-0.152065	20.3853	-2.46424	0.0146692	0.883312	0.534899	-0.744079	1.81388	20.1926	0.832451	0.407663	0.904707	0	0
hilic	pm2.5	lur	1	0	120.105	59.081	-0.195341	-0.475157	0.0844759	21.8032	-1.37458	0.170431	0.882898	-0.0959582	-0.352508	0.160591	21.7969	-0.738055	0.461442	0.961983	-0.309464	-1.03593	0.417004	21.8171	-0.847899	0.399055	0.901818	0	0
hilic	pm2.5	lur	1	0	300.794	66.185	0.425471	-0.184263	1.0352	15.9007	1.37398	0.170618	0.882898	0.459312	-0.312041	1.23067	15.867	1.17499	0.241552	0.961983	0.767754	-0.171714	1.70722	15.975	1.62664	0.107797	0.855884	0	0
hilic	pm2.5	lur	1	0	337.922	67.501	-0.102551	-0.249706	0.0446033	22.8551	-1.3722	0.171169	0.882898	-0.0608267	-0.233936	0.112283	22.9053	-0.693349	0.488984	0.961983	-0.181147	-0.480281	0.117986	22.7444	-1.20536	0.231661	0.866654	0	0
hilic	pm2.5	lur	1	0	171.089	122.669	-0.166256	-0.404834	0.0723227	22.9007	-1.37213	0.171191	0.882898	-0.246275	-0.531127	0.0385772	22.9351	-1.706	0.0897331	0.883312	-0.0910324	-0.555402	0.373337	22.8249	-0.390196	0.697442	0.945635	0	0
hilic	pm2.5	lur	1	0	337.258	31.3	-0.355681	-0.866298	0.154937	16.0897	-1.37156	0.171369	0.882898	-0.11544	-0.747178	0.516298	16.1974	-0.360577	0.718839	0.973263	-0.712667	-1.57666	0.151328	15.8525	-1.64182	0.104602	0.855884	0	0
hilic	pm2.5	lur	1	0	742.76	80.561	-0.361369	-0.88093	0.158191	19.2874	-1.36951	0.172007	0.882898	-0.195791	-0.788472	0.39689	19.4813	-0.651853	0.515327	0.961983	-0.746958	-1.83585	0.341932	18.8604	-1.36541	0.176	0.855884	0	0
hilic	pm2.5	lur	1	0	199.107	109.416	-0.136124	-0.331869	0.0596212	19.7704	-1.36929	0.172077	0.882898	-0.123689	-0.372412	0.125033	19.7615	-0.981288	0.327768	0.961983	-0.144584	-0.46859	0.179423	19.79	-0.888209	0.377124	0.895002	0	0
hilic	pm2.5	lur	1	0	936.475	67.205	0.187672	-0.0826062	0.45795	21.684	1.36722	0.172723	0.882898	0.24441	-0.0895326	0.578352	21.6421	1.44419	0.150423	0.920753	-0.003993	-0.447313	0.439327	21.7763	-0.0179281	0.985741	0.999158	0	0
hilic	pm2.5	lur	1	0	175.162	106.547	-0.179418	-0.437872	0.0790353	22.9308	-1.36689	0.172825	0.882898	-0.142442	-0.46277	0.177885	22.9617	-0.877452	0.381411	0.961983	-0.229897	-0.686189	0.226395	22.8628	-1.00286	0.31899	0.895002	0	0
hilic	pm2.5	lur	1	0	365.136	255.501	0.125382	-0.0553004	0.306064	20.7537	1.36638	0.172988	0.882898	-0.0118951	-0.238623	0.214833	20.7626	-0.103524	0.917663	0.990901	0.436596	0.127568	0.745624	20.7339	2.81211	0.00620547	0.855884	0	0
hilic	pm2.5	lur	1	0	878.735	81.454	-0.326141	-0.79652	0.144236	18.1616	-1.36524	0.173343	0.882898	-0.18849	-0.770174	0.393194	18.3639	-0.639411	0.523369	0.961983	-0.583913	-1.44058	0.272751	17.7161	-1.35671	0.178736	0.855884	0	0
hilic	pm2.5	lur	1	0	1056.82	85.876	0.297459	-0.131607	0.726524	19.3731	1.36507	0.173398	0.882898	0.304833	-0.208526	0.818192	19.4578	1.17171	0.242864	0.961983	0.276408	-0.554042	1.10686	19.1867	0.662502	0.509578	0.920114	0	0
hilic	pm2.5	lur	1	0	737.357	84.936	0.12591	-0.0561681	0.307989	23.4803	1.36161	0.174485	0.882898	0.0290712	-0.190961	0.249103	23.4714	0.260708	0.794616	0.986872	0.339984	-0.0082627	0.68823	23.4999	1.94322	0.0555511	0.855884	0	0
hilic	pm2.5	lur	1	0	161.562	76.654	-0.260094	-0.636332	0.116144	17.9155	-1.36119	0.174619	0.882898	-0.370478	-0.848464	0.107507	17.8725	-1.52942	0.127916	0.891976	-0.0069126	-0.638456	0.624631	18.0103	-0.0217864	0.982673	0.999158	0	0
hilic	pm2.5	lur	1	0	139.075	279.315	-0.317257	-0.776426	0.141912	16.6763	-1.36047	0.174845	0.882898	-0.376486	-0.90246	0.149488	16.6074	-1.41242	0.159554	0.92383	-0.251221	-1.22885	0.726408	16.8282	-0.511485	0.610438	0.92951	0	0
hilic	pm2.5	lur	1	0	283.162	73.96	-0.563981	-1.38082	0.252857	22.509	-1.3595	0.175152	0.882898	-0.462647	-1.40481	0.479513	22.7268	-0.968954	0.333868	0.961983	-0.724521	-2.40116	0.952122	22.0294	-0.860123	0.392324	0.895002	0	0
hilic	pm2.5	lur	1	0	268.14	52.69	0.243371	-0.109334	0.596077	21.39	1.35865	0.175421	0.882898	0.301942	-0.154037	0.757921	21.3293	1.30664	0.193001	0.952239	0.078677	-0.481382	0.638737	21.5235	0.279617	0.780502	0.967965	0	0
hilic	pm2.5	lur	1	0	301.293	31.477	-0.249505	-0.611118	0.112108	18.9888	-1.35858	0.175443	0.882898	-0.34984	-0.81415	0.11447	19.0267	-1.48676	0.138829	0.915223	0.177133	-0.382761	0.737027	18.9052	0.629714	0.530698	0.920494	0	0
hilic	pm2.5	lur	1	0	342.247	38.879	-0.159391	-0.390634	0.0718524	20.692	-1.3572	0.17588	0.882898	-0.0601277	-0.334388	0.214133	20.6316	-0.432603	0.665821	0.970577	-0.455247	-0.893666	-0.0168287	20.8252	-2.06685	0.0420235	0.855884	0	0
hilic	pm2.5	lur	1	0	522.599	66.175	0.125523	-0.0568328	0.307879	21.2907	1.35536	0.176465	0.882898	-0.0209102	-0.242268	0.200448	21.3228	-0.186398	0.852342	0.989597	0.503956	0.17274	0.835173	21.2199	3.02852	0.00331893	0.855884	0	0
hilic	pm2.5	lur	1	0	508.622	67.757	0.0624022	-0.0282623	0.153067	24.0259	1.35523	0.176506	0.882898	-0.0052175	-0.113995	0.10356	24.0106	-0.0946457	0.924701	0.990901	0.243189	0.0662916	0.420085	24.0595	2.73636	0.00766969	0.855884	0	0
hilic	pm2.5	lur	1	0	115.964	286.52	0.0683952	-0.0310318	0.167822	23.5469	1.35448	0.176746	0.882898	-0.0036876	-0.0940026	0.0866274	23.5539	-0.0805675	0.935875	0.990901	0.198963	-0.0673791	0.465306	23.5316	1.4869	0.14102	0.855884	0	0
hilic	pm2.5	lur	1	0	142.984	267.201	0.0754918	-0.0342615	0.185245	20.6674	1.35436	0.176785	0.882898	0.00740853	-0.108867	0.123684	20.7278	0.125725	0.90009	0.990901	0.204183	-0.053438	0.461804	20.5345	1.57757	0.11866	0.855884	0	0
hilic	pm2.5	lur	1	0	174.149	31.725	0.207217	-0.0940576	0.508491	19.9291	1.3543	0.176804	0.882898	0.22038	-0.136332	0.577092	19.933	1.21908	0.22441	0.961983	0.223171	-0.334994	0.781335	19.9205	0.795839	0.42851	0.905711	0	0
hilic	pm2.5	lur	1	0	135.066	94.353	0.0934084	-0.0424782	0.229295	23.2449	1.35351	0.177056	0.882898	0.115469	-0.0537769	0.284714	23.2375	1.34625	0.179916	0.945827	0.0473215	-0.202008	0.296651	23.2612	0.377778	0.706609	0.947714	0	0
hilic	pm2.5	lur	1	0	287.939	85.936	-0.32446	-0.796825	0.147904	16.5754	-1.35249	0.177379	0.882898	-0.269551	-0.861596	0.322494	16.6346	-0.89839	0.370178	0.961983	-0.346185	-1.15953	0.467156	16.4448	-0.847199	0.399443	0.901818	0	0
hilic	pm2.5	lur	1	0	186.981	22.399	0.0715256	-0.0326082	0.175659	23.0873	1.35245	0.177393	0.882898	0.0593947	-0.07057	0.189359	23.1235	0.90178	0.368379	0.961983	0.0836581	-0.10971	0.277026	23.0074	0.86114	0.391766	0.895002	0	0
hilic	pm2.5	lur	1	0	137.052	68.187	0.292076	-0.133467	0.717619	19.5494	1.35146	0.177709	0.882898	0.245549	-0.32531	0.816409	19.3608	0.848765	0.397139	0.961983	0.416474	-0.140626	0.973575	19.9648	1.48801	0.14073	0.855884	0	0
hilic	pm2.5	lur	1	0	186.828	63.412	0.291854	-0.134061	0.71777	16.2455	1.34925	0.178416	0.882898	0.0961222	-0.362827	0.555072	16.1457	0.413273	0.679899	0.970577	0.651106	-0.317613	1.61982	16.4654	1.33784	0.184787	0.855884	0	0
hilic	pm2.5	lur	1	0	160.08	100.482	0.088888	-0.0408432	0.218619	22.9444	1.34912	0.17846	0.882898	0.0549121	-0.101283	0.211107	22.9602	0.693713	0.488756	0.961983	0.152886	-0.0965131	0.402286	22.9095	1.22018	0.226026	0.863414	0	0
hilic	pm2.5	lur	1	0	98.096	273.782	-0.160662	-0.395208	0.0738835	21.3436	-1.34877	0.178571	0.882898	-0.100057	-0.391181	0.191068	21.2995	-0.678181	0.498528	0.961983	-0.276692	-0.670537	0.117153	21.4408	-1.39837	0.165915	0.855884	0	0
hilic	pm2.5	lur	1	0	177.069	61.345	-0.118048	-0.290431	0.0543347	21.9817	-1.34839	0.178692	0.882898	-0.0858004	-0.286387	0.114786	22.0193	-0.844045	0.399765	0.961983	-0.203854	-0.56468	0.156972	21.8989	-1.12453	0.264193	0.886342	0	0
hilic	pm2.5	lur	1	0	133.108	59.233	-0.151792	-0.373619	0.0700342	23.1365	-1.34737	0.17902	0.882898	-0.104722	-0.379604	0.17016	23.1569	-0.751743	0.453187	0.961983	-0.294251	-0.697968	0.109465	23.0915	-1.45075	0.150809	0.855884	0	0
hilic	pm2.5	lur	1	0	586.434	37.004	-0.450928	-1.11015	0.208292	17.3489	-1.34688	0.17918	0.882898	-0.326839	-1.14818	0.494498	17.0498	-0.785218	0.433358	0.961983	-0.522614	-1.65266	0.60743	18.0076	-0.920526	0.3601	0.895002	0	0
hilic	pm2.5	lur	1	0	596.668	65.505	0.213888	-0.0989824	0.526759	20.3161	1.34609	0.179434	0.882898	0.210575	-0.178611	0.59976	20.1939	1.06765	0.287109	0.961983	0.410566	-0.129421	0.950552	20.5852	1.51339	0.134171	0.855884	0	0
hilic	pm2.5	lur	1	0	96.922	69.145	0.0337916	-0.0156417	0.0832249	27.2459	1.34599	0.179466	0.882898	0.0133417	-0.0432436	0.0699271	27.2469	0.46525	0.642315	0.970577	0.103785	-0.0110066	0.218576	27.2435	1.79959	0.0757423	0.855884	0	0
hilic	pm2.5	lur	1	0	455.345	38.114	-0.327688	-0.807099	0.151723	18.3936	-1.34587	0.179503	0.882898	-0.447354	-1.13291	0.238198	17.9986	-1.28762	0.19953	0.957234	-0.075724	-0.368459	0.217011	19.2635	-0.514884	0.608071	0.92951	0	0
hilic	pm2.5	lur	1	0	804.55	65.765	-0.144455	-0.356324	0.0674142	22.6713	-1.3425	0.18059	0.882898	-0.153817	-0.405903	0.0982695	22.6579	-1.20402	0.230164	0.961983	-0.15008	-0.560156	0.259996	22.7007	-0.728465	0.468483	0.914945	0	0
hilic	pm2.5	lur	1	0	506.714	67.783	0.0465319	-0.0217416	0.114806	25.1948	1.34199	0.180756	0.882898	0.0844796	-0.0020383	0.170997	25.1901	1.92674	0.0555866	0.883312	-0.0356773	-0.162076	0.0907213	25.2052	-0.561824	0.575826	0.925369	0	0
hilic	pm2.5	lur	1	0	508.894	71.963	0.165298	-0.0779685	0.408564	20.4452	1.33794	0.182072	0.882898	0.279859	-0.0348376	0.594556	20.4009	1.75479	0.0809967	0.883312	-0.0823264	-0.464205	0.299552	20.5428	-0.429106	0.669014	0.941473	0	0
hilic	pm2.5	lur	1	0	288.289	37.991	-0.44905	-1.11024	0.212144	18.2579	-1.33726	0.182292	0.882898	-0.246757	-1.0736	0.580082	18.785	-0.58888	0.55668	0.961983	-1.1784	-2.30828	-0.048518	17.0972	-2.07592	0.041154	0.855884	0	0
hilic	pm2.5	lur	1	0	177.106	100.743	0.0803569	-0.0380297	0.198743	24.3773	1.33651	0.182538	0.882898	0.0522158	-0.089369	0.193801	24.3933	0.727719	0.467732	0.961983	0.128448	-0.105173	0.36207	24.3422	1.09437	0.277116	0.895002	0	0
hilic	pm2.5	lur	1	0	518.74	65.901	0.0493842	-0.0234393	0.122208	25.3408	1.33526	0.182944	0.882898	0.0825079	-0.0007276	0.165743	25.3414	1.95598	0.0520149	0.883312	-0.0202742	-0.183158	0.142609	25.3394	-0.247752	0.804969	0.9738	0	0
hilic	pm2.5	lur	1	0	118.065	58.234	-0.056111	-0.138973	0.0267509	25.4407	-1.33335	0.18357	0.882898	-0.0434837	-0.143636	0.0566688	25.4757	-0.856727	0.392735	0.961983	-0.104808	-0.271412	0.061796	25.3634	-1.25216	0.214206	0.855884	0	0
hilic	pm2.5	lur	1	0	214.006	85.094	-0.0976492	-0.241891	0.0465927	23.6233	-1.33299	0.183687	0.882898	-0.0182225	-0.176194	0.139749	23.6697	-0.227617	0.820202	0.988245	-0.262687	-0.58916	0.0637864	23.5211	-1.60155	0.113246	0.855884	0	0
hilic	pm2.5	lur	1	0	332.331	33.335	0.386784	-0.184847	0.958416	17.9737	1.3323	0.183913	0.882898	0.175568	-0.507229	0.858364	18.1212	0.507377	0.612511	0.967904	0.765464	-0.348913	1.87984	17.649	1.36723	0.175429	0.855884	0	0
hilic	pm2.5	lur	1	0	185.983	21.131	0.0599683	-0.0286742	0.148611	19.1649	1.33208	0.183987	0.882898	0.0642707	-0.0496681	0.178209	19.177	1.11306	0.267166	0.961983	0.013209	-0.137044	0.163462	19.1381	0.174983	0.86154	0.98273	0	0
hilic	pm2.5	lur	1	0	282.012	60.776	-0.214528	-0.531802	0.102746	19.8002	-1.33138	0.184218	0.882898	0.0189178	-0.360491	0.398326	19.8607	0.0983878	0.921734	0.990901	-0.658098	-1.25546	-0.0607358	19.6669	-2.19282	0.0312618	0.855884	0	0
hilic	pm2.5	lur	1	0	740.546	67.144	0.0512781	-0.0245741	0.12713	24.3297	1.33111	0.184305	0.882898	0.0571623	-0.0475082	0.161833	24.3175	1.07761	0.282648	0.961983	0.0425919	-0.060451	0.145635	24.3566	0.822734	0.413135	0.905711	0	0
hilic	pm2.5	lur	1	0	168.09	61.752	-0.115275	-0.28612	0.0555704	23.8673	-1.32856	0.185143	0.882898	-0.156083	-0.372311	0.0601451	24.0028	-1.42437	0.156072	0.92383	0.00247926	-0.282427	0.287386	23.569	0.0173209	0.986224	0.999158	0	0
hilic	pm2.5	lur	1	0	129.02	144.569	0.133645	-0.064456	0.331745	20.4445	1.32836	0.18521	0.882898	0.174229	-0.0812173	0.429675	20.4549	1.34586	0.180042	0.945827	0.0664207	-0.24865	0.381491	20.4215	0.41961	0.675909	0.944244	0	0
hilic	pm2.5	lur	1	0	346.059	101.09	-0.288392	-0.716048	0.139265	18.9089	-1.32782	0.185389	0.882898	-0.417751	-0.927092	0.0915895	18.9965	-1.61841	0.107326	0.891976	-0.0907555	-0.883938	0.702427	18.716	-0.227746	0.820432	0.980706	0	0
hilic	pm2.5	lur	1	0	339.345	36.786	-0.356846	-0.886741	0.173049	19.6175	-1.326	0.185991	0.882898	-0.296361	-0.946885	0.354163	19.7036	-0.89895	0.36988	0.961983	-0.525411	-1.49859	0.447764	19.4278	-1.07463	0.285812	0.895002	0	0
hilic	pm2.5	lur	1	0	353.968	78.481	0.408561	-0.198421	1.01554	19.6177	1.32535	0.186204	0.882898	0.505337	-0.223466	1.23414	19.6505	1.3682	0.172956	0.940505	0.330937	-0.829321	1.49119	19.5454	0.567729	0.571829	0.925369	0	0
hilic	pm2.5	lur	1	0	106.065	122.831	0.131084	-0.0636627	0.325831	20.7433	1.32535	0.186205	0.882898	0.219293	-0.0291711	0.467757	20.7599	1.74156	0.0832934	0.883312	-0.0801961	-0.406062	0.245669	20.7067	-0.489852	0.625596	0.93368	0	0
hilic	pm2.5	lur	1	0	335.094	86.335	-0.103339	-0.256874	0.0501959	21.041	-1.32528	0.186228	0.882898	-0.187454	-0.362669	-0.0122396	21.1014	-2.11107	0.036147	0.883312	0.141103	-0.181321	0.463527	20.9082	0.871082	0.386348	0.895002	0	0
hilic	pm2.5	lur	1	0	212.092	60.922	0.338737	-0.16458	0.842053	19.0144	1.32517	0.186264	0.882898	0.272655	-0.27962	0.82493	19.5101	0.974173	0.331278	0.961983	0.332681	-0.775958	1.44132	17.9226	0.597294	0.552019	0.920494	0	0
hilic	pm2.5	lur	1	0	107.086	121.104	-0.139186	-0.345999	0.0676264	20.7715	-1.32517	0.186266	0.882898	-0.0533855	-0.296722	0.189951	20.8367	-0.432907	0.665601	0.970577	-0.310675	-0.71744	0.0960904	20.6279	-1.52024	0.132442	0.855884	0	0
hilic	pm2.5	lur	1	0	162.151	72.793	-0.335874	-0.835321	0.163572	22.0081	-1.32415	0.186601	0.882898	-0.446193	-1.00402	0.111633	21.8999	-1.57835	0.116242	0.891976	-0.204548	-1.23274	0.82365	22.2464	-0.395975	0.69319	0.944899	0	0
hilic	pm2.5	lur	1	0	158.843	59.821	-0.324238	-0.806536	0.15806	21.5475	-1.32373	0.186742	0.882898	-0.391228	-1.02567	0.243213	21.3978	-1.21679	0.225276	0.961983	-0.0316216	-0.740444	0.677201	21.8773	-0.0887967	0.929468	0.992091	0	0
hilic	pm2.5	lur	1	0	420.318	29.661	-0.161589	-0.402082	0.0789042	19.4794	-1.323	0.186984	0.882898	-0.0554815	-0.362699	0.251736	19.4845	-0.356353	0.721994	0.975458	-0.275633	-0.645463	0.0941979	19.4684	-1.48347	0.141928	0.855884	0	0
hilic	pm2.5	lur	1	0	294.939	82.731	0.049695	-0.024267	0.123657	28.0663	1.32299	0.186989	0.882898	0.045381	-0.042379	0.133141	28.0812	1.02037	0.308925	0.961983	0.0693861	-0.0885781	0.22735	28.0334	0.874307	0.384601	0.895002	0	0
hilic	pm2.5	lur	1	0	480.704	65.424	-0.322602	-0.803265	0.158061	17.8159	-1.32153	0.187472	0.882898	-0.583127	-1.21657	0.0503141	17.5433	-1.8165	0.0709576	0.883312	0.335279	-0.335006	1.00556	18.4162	0.995627	0.322471	0.895002	0	0
hilic	pm2.5	lur	1	0	438.727	68.044	0.0396082	-0.0194453	0.0986618	26.352	1.32066	0.187763	0.882898	0.0316669	-0.0467206	0.110054	26.3422	0.797145	0.426417	0.961983	0.0449966	-0.0569759	0.146969	26.3735	0.878308	0.38244	0.895002	0	0
hilic	pm2.5	lur	1	0	254.248	27.171	0.14825	-0.0729923	0.369493	18.3283	1.3194	0.188181	0.882898	0.0200567	-0.217473	0.257586	18.2798	0.166617	0.867858	0.989597	0.509831	0.0169496	1.00271	18.4351	2.05889	0.0427994	0.855884	0	0
hilic	pm2.5	lur	1	0	140.082	33.221	-0.264022	-0.658262	0.130218	19.404	-1.31865	0.188433	0.882898	-0.297745	-0.804469	0.208978	19.4262	-1.15945	0.247808	0.961983	-0.0902628	-0.721411	0.540886	19.355	-0.284661	0.776649	0.965845	0	0
hilic	pm2.5	lur	1	0	176.122	107.696	-0.126205	-0.314673	0.0622642	27.289	-1.31852	0.188476	0.882898	-0.157053	-0.397245	0.0831376	27.3645	-1.29023	0.198624	0.957234	-0.0731235	-0.366194	0.219947	27.1229	-0.496632	0.620827	0.93368	0	0
hilic	pm2.5	lur	1	0	265.009	231.379	0.342529	-0.169285	0.854342	17.705	1.31776	0.188731	0.882898	0.0404238	-0.454037	0.534884	17.4524	0.161318	0.872024	0.989597	1.18129	-0.0825231	2.44511	18.2614	1.86048	0.0665388	0.855884	0	0
hilic	pm2.5	lur	1	0	270.1	117.939	-0.455257	-1.13569	0.22518	17.7057	-1.31741	0.188849	0.882898	-0.390692	-1.14227	0.360882	17.8364	-1.02575	0.306387	0.961983	-0.421161	-1.89715	1.05483	17.418	-0.567956	0.571676	0.925369	0	0
hilic	pm2.5	lur	1	0	86.081	113.569	0.158825	-0.078607	0.396256	21.9719	1.31714	0.18894	0.882898	0.160921	-0.124946	0.446788	21.9664	1.11077	0.268147	0.961983	0.13022	-0.333688	0.594128	21.9838	0.558721	0.577932	0.925509	0	0
hilic	pm2.5	lur	1	0	513.796	67.535	-0.238753	-0.595756	0.11825	21.0029	-1.31682	0.189044	0.882898	-0.121307	-0.543496	0.300881	21.1012	-0.566968	0.571443	0.962318	-0.359049	-1.06642	0.348321	20.7865	-1.01032	0.315428	0.895002	0	0
hilic	pm2.5	lur	1	0	126.066	36.85	0.129089	-0.0640195	0.322197	20.0876	1.31625	0.189236	0.882898	0.26519	0.0130399	0.517339	20.0749	2.07528	0.0393829	0.883312	-0.231243	-0.513597	0.0511116	20.1156	-1.63014	0.107053	0.855884	0	0
hilic	pm2.5	lur	1	0	164.092	99.408	-0.103766	-0.25923	0.0516978	21.3984	-1.31425	0.189908	0.882898	-0.16902	-0.351901	0.0138607	21.388	-1.82368	0.0698593	0.883312	0.00691916	-0.309324	0.323162	21.4214	0.0435495	0.965373	0.998705	0	0
hilic	pm2.5	lur	1	0	138.906	73.582	0.0454375	-0.0227364	0.113611	26.9737	1.31234	0.190549	0.882898	0.0318811	-0.048531	0.112293	26.9753	0.78233	0.435048	0.961983	0.07869	-0.0702851	0.227665	26.9702	1.05137	0.296293	0.895002	0	0
hilic	pm2.5	lur	1	0	433.352	37.592	-0.328349	-0.82148	0.164781	18.2852	-1.31107	0.190978	0.882898	-0.237312	-0.834454	0.35983	18.462	-0.784188	0.433961	0.961983	-0.443658	-1.34767	0.460357	17.8959	-0.976838	0.331631	0.895002	0	0
hilic	pm2.5	lur	1	0	207.972	95.87	-0.322002	-0.805854	0.161851	18.8504	-1.31038	0.191211	0.882898	-0.145746	-0.712855	0.421364	18.8704	-0.507116	0.612694	0.967904	-0.932529	-1.89013	0.0250705	18.8061	-1.93833	0.056154	0.855884	0	0
hilic	pm2.5	lur	1	0	634.749	69.074	0.274211	-0.137863	0.686285	20.27	1.31027	0.191248	0.882898	0.27768	-0.195798	0.751159	20.3103	1.15724	0.248708	0.961983	0.349168	-0.504816	1.20315	20.1813	0.813833	0.418186	0.905711	0	0
hilic	pm2.5	lur	1	0	193.028	89.085	-0.1081	-0.270563	0.0543624	20.4025	-1.31016	0.191285	0.882898	-0.0263974	-0.200849	0.148054	20.4254	-0.298582	0.765603	0.986872	-0.297864	-0.650599	0.0548703	20.3519	-1.68082	0.0967477	0.855884	0	0
hilic	pm2.5	lur	1	0	144.113	85.962	-0.426882	-1.06852	0.214757	18.5586	-1.30999	0.191342	0.882898	-0.366213	-1.1303	0.397876	18.5865	-0.945732	0.345553	0.961983	-0.331747	-1.57565	0.912151	18.4971	-0.530851	0.597011	0.929487	0	0
hilic	pm2.5	lur	1	0	302.881	68.139	0.120501	-0.060624	0.301626	20.7779	1.30998	0.191347	0.882898	0.155597	-0.0480132	0.359207	20.7262	1.50792	0.133327	0.904786	0.147648	-0.243462	0.538758	20.8917	0.751412	0.454637	0.910009	0	0
hilic	pm2.5	lur	1	0	117.96	285.815	0.075527	-0.0380477	0.189102	22.2177	1.3094	0.191542	0.882898	0.0071945	-0.0997796	0.114169	22.2505	0.132709	0.894572	0.990901	0.212582	-0.0845897	0.509754	22.1453	1.42387	0.158422	0.855884	0	0
hilic	pm2.5	lur	1	0	120.044	295.028	-0.168051	-0.420961	0.0848595	21.6447	-1.30835	0.191896	0.882898	-0.20092	-0.481611	0.0797714	21.635	-1.41245	0.159545	0.92383	-0.0654293	-0.630767	0.499908	21.666	-0.230364	0.818404	0.980706	0	0
hilic	pm2.5	lur	1	0	116.067	52.843	-0.424416	-1.0635	0.214666	19.8224	-1.30763	0.19214	0.882898	-0.601691	-1.30502	0.101641	19.5291	-1.68807	0.093129	0.883312	-0.0032251	-1.41705	1.4106	20.4685	-0.0045404	0.996389	0.999568	0	0
hilic	pm2.5	lur	1	0	275.134	92.594	0.407395	-0.206108	1.0209	16.7997	1.30752	0.192176	0.882898	0.311232	-0.490326	1.11279	16.361	0.766174	0.444576	0.961983	0.267944	-0.59468	1.13057	17.7658	0.618263	0.53818	0.920494	0	0
hilic	pm2.5	lur	1	0	280.162	29.369	0.213971	-0.108516	0.536458	20.0424	1.30645	0.192539	0.882898	0.212933	-0.154106	0.579971	20.0535	1.14475	0.253834	0.961983	0.247404	-0.415901	0.910709	20.018	0.742409	0.460041	0.911684	0	0
hilic	pm2.5	lur	1	0	133.134	260.275	0.104868	-0.0532323	0.262968	20.4352	1.30605	0.192676	0.882898	0.0579196	-0.138003	0.253842	20.4772	0.583337	0.560397	0.961983	0.177486	-0.113474	0.468445	20.3428	1.21417	0.228298	0.863918	0	0
hilic	pm2.5	lur	1	0	442.352	38.896	-0.327348	-0.820966	0.16627	16.4955	-1.30578	0.192768	0.882898	-0.41014	-0.973512	0.153232	16.7	-1.43653	0.152587	0.92095	-0.0975343	-1.13038	0.935308	16.0452	-0.187964	0.851387	0.980706	0	0
hilic	pm2.5	lur	1	0	162.05	68.987	-0.0600949	-0.150833	0.0306432	26.4604	-1.30406	0.193352	0.884079	-0.009304	-0.118148	0.0995402	26.4988	-0.168672	0.866244	0.989597	-0.162623	-0.343281	0.0180345	26.3757	-1.79175	0.0770023	0.855884	0	0
hilic	pm2.5	lur	1	0	264.973	94.688	0.294622	-0.150763	0.740008	16.5764	1.30251	0.193881	0.885012	0.341224	-0.201069	0.883517	16.6354	1.24161	0.215998	0.961983	0.300409	-0.524058	1.12488	16.4463	0.725253	0.470439	0.917239	0	0
hilic	pm2.5	lur	1	0	326.305	31.387	-0.111663	-0.280715	0.0573894	19.8447	-1.30058	0.194539	0.885165	-0.150264	-0.356421	0.0558932	19.9087	-1.43825	0.1521	0.92095	0.00886308	-0.310909	0.328635	19.7036	0.0551689	0.956143	0.996502	0	0
hilic	pm2.5	lur	1	0	332.287	274.259	0.115165	-0.0592001	0.289529	20.6571	1.3005	0.194567	0.885165	0.076224	-0.135514	0.287962	20.7134	0.710347	0.478408	0.961983	0.232423	-0.0935502	0.558396	20.5329	1.41921	0.15977	0.855884	0	0
hilic	pm2.5	lur	1	0	325.292	277.673	0.202716	-0.104933	0.510365	20.3713	1.29743	0.195621	0.886165	0.286087	-0.108631	0.680806	20.3545	1.43018	0.1544	0.923678	-0.0220385	-0.521072	0.476995	20.4083	-0.0879029	0.930176	0.992091	0	0
hilic	pm2.5	lur	1	0	134.106	58.667	-0.0748487	-0.188453	0.0387552	24.3708	-1.2973	0.195663	0.886165	-0.0140889	-0.151483	0.123305	24.4371	-0.202343	0.839877	0.988245	-0.213819	-0.435879	0.00824196	24.2246	-1.91657	0.0589087	0.855884	0	0
hilic	pm2.5	lur	1	0	228.122	43.45	0.168629	-0.0874202	0.424678	20.7476	1.29676	0.19585	0.886165	0.0949214	-0.180826	0.370668	20.7759	0.679252	0.497851	0.961983	0.262688	-0.319986	0.845363	20.6853	0.897357	0.372255	0.895002	0	0
hilic	pm2.5	lur	1	0	341.962	67.7	-0.0724635	-0.182684	0.037757	23.3775	-1.29452	0.196622	0.886165	-0.0452134	-0.175778	0.0853515	23.4096	-0.683312	0.495288	0.961983	-0.149896	-0.375037	0.0752443	23.3068	-1.32522	0.188918	0.855884	0	0
hilic	pm2.5	lur	1	0	175.74	107.694	-0.100419	-0.25327	0.0524321	20.0281	-1.2936	0.19694	0.886165	-0.118922	-0.309995	0.0721513	20.0826	-1.22812	0.221006	0.961983	-0.0696004	-0.319641	0.18044	19.9081	-0.554053	0.581107	0.927523	0	0
hilic	pm2.5	lur	1	0	195.174	130.296	-0.154102	-0.388766	0.0805609	19.601	-1.29305	0.197128	0.886165	-0.0839352	-0.365297	0.197427	19.5978	-0.58865	0.556834	0.961983	-0.226869	-0.680368	0.22663	19.608	-0.995748	0.322412	0.895002	0	0
hilic	pm2.5	lur	1	0	143.959	285.778	0.0856437	-0.044938	0.216225	20.7688	1.29141	0.197695	0.886165	-0.0475486	-0.154062	0.0589649	20.8139	-0.880869	0.379564	0.961983	0.296617	-0.0535822	0.646816	20.6694	1.6859	0.095761	0.855884	0	0
hilic	pm2.5	lur	1	0	226.18	31.514	0.232802	-0.122354	0.587957	19.833	1.29068	0.197948	0.886165	0.180772	-0.265749	0.627294	19.8462	0.798854	0.425428	0.961983	0.287238	-0.328644	0.903119	19.8038	0.928313	0.356073	0.895002	0	0
hilic	pm2.5	lur	1	0	114.393	52.618	0.315664	-0.166481	0.797809	20.3559	1.28913	0.198484	0.886165	0.128242	-0.479209	0.735694	20.329	0.41658	0.677482	0.970577	0.868723	0.0511864	1.68626	20.4152	2.11507	0.0375755	0.855884	0	0
hilic	pm2.5	lur	1	0	615.821	70.299	-0.32815	-0.829446	0.173147	17.7665	-1.28893	0.198556	0.886165	-0.116328	-0.688576	0.45592	17.7761	-0.401122	0.688806	0.970577	-0.695218	-1.74814	0.357701	17.7453	-1.31425	0.192566	0.855884	0	0
hilic	pm2.5	lur	1	0	207.897	68.486	0.031553	-0.016681	0.0797869	21.9121	1.28807	0.198854	0.886165	0.0395607	-0.0222648	0.101386	21.9051	1.26263	0.208357	0.961983	0.0233898	-0.0719587	0.118738	21.9274	0.488273	0.626709	0.93368	0	0
hilic	pm2.5	lur	1	0	498.901	84.408	0.0547428	-0.0289774	0.138463	28.543	1.2875	0.199051	0.886165	0.0588693	-0.0476575	0.165396	28.5399	1.09046	0.27697	0.961983	0.0547924	-0.0978414	0.207426	28.5498	0.714529	0.477006	0.919047	0	0
hilic	pm2.5	lur	1	0	246.17	47.929	-0.0973836	-0.246326	0.0515591	25.7316	-1.28741	0.199083	0.886165	-0.166389	-0.338939	0.00616172	25.7831	-1.90277	0.0586672	0.883312	0.0564842	-0.25137	0.364338	25.6181	0.365201	0.715937	0.9517	0	0
hilic	pm2.5	lur	1	0	670.633	32.031	-0.471898	-1.19408	0.250282	14.9678	-1.28663	0.199355	0.886165	-0.271087	-1.17242	0.630246	14.5588	-0.593473	0.553609	0.961983	-0.582282	-1.80526	0.640691	15.8686	-0.947691	0.346176	0.895002	0	0
hilic	pm2.5	lur	1	0	196.997	289.802	-0.238604	-0.604567	0.127359	18.6341	-1.28378	0.200348	0.886426	-0.270969	-0.702989	0.161051	18.6172	-1.23764	0.217462	0.961983	-0.170928	-0.907532	0.565676	18.6713	-0.46188	0.645437	0.937675	0	0
hilic	pm2.5	lur	1	0	464.313	44.483	-0.169436	-0.429321	0.0904486	20.0787	-1.28374	0.200363	0.886426	-0.0273496	-0.272722	0.218022	20.3626	-0.21994	0.826167	0.988245	-0.447019	-1.0731	0.179061	19.4536	-1.42117	0.159202	0.855884	0	0
hilic	pm2.5	lur	1	0	293.034	73.377	0.234054	-0.124966	0.593074	18.6104	1.28365	0.200392	0.886426	0.383243	-0.0664499	0.832936	18.7178	1.68165	0.0943705	0.883312	-0.0779296	-0.703768	0.547908	18.374	-0.247851	0.804893	0.9738	0	0
hilic	pm2.5	lur	1	0	732.551	42.567	-0.112222	-0.284819	0.0603747	24.6787	-1.28026	0.201583	0.889141	-0.0615081	-0.268533	0.145517	24.6076	-0.586256	0.558438	0.961983	-0.232372	-0.566941	0.102196	24.8353	-1.38245	0.170728	0.855884	0	0
hilic	pm2.5	lur	1	0	228.955	82.914	0.0529045	-0.0284763	0.134285	24.4875	1.28003	0.201661	0.889141	0.0828583	-0.0138404	0.179557	24.4956	1.6908	0.092605	0.883312	-0.0339489	-0.204489	0.136592	24.4696	-0.396231	0.693003	0.944899	0	0
hilic	pm2.5	lur	1	0	154.967	295.096	0.15829	-0.0857218	0.402301	21.6392	1.2773	0.202622	0.890537	0.170873	-0.0694743	0.41122	21.7366	1.40285	0.162383	0.92383	0.157286	-0.448678	0.763251	21.4248	0.516646	0.606846	0.92951	0	0
hilic	pm2.5	lur	1	0	535.298	56.282	-0.0790211	-0.200839	0.0427969	25.6673	-1.27727	0.202633	0.890537	-0.0030641	-0.13784	0.131712	25.7349	-0.0448615	0.964267	0.993869	-0.191836	-0.456788	0.0731156	25.5186	-1.44117	0.153489	0.855884	0	0
hilic	pm2.5	lur	1	0	454.388	37.893	-0.257101	-0.654195	0.139994	20.3217	-1.27485	0.203486	0.891617	-0.222708	-0.69413	0.248715	20.5032	-0.932187	0.352489	0.961983	-0.327517	-1.10081	0.445778	19.9218	-0.843022	0.401761	0.901942	0	0
hilic	pm2.5	lur	1	0	818.562	66.356	0.397252	-0.216375	1.01088	21.3998	1.27471	0.203536	0.891617	0.391016	-0.279916	1.06195	21.3666	1.14999	0.251674	0.961983	0.546052	-0.818802	1.91091	21.473	0.796339	0.428221	0.905711	0	0
hilic	pm2.5	lur	1	0	324.99	75.983	0.164941	-0.0908445	0.420725	23.4116	1.26971	0.205311	0.892049	0.232523	-0.0768812	0.541927	23.3432	1.48292	0.139845	0.915223	0.0834112	-0.400768	0.567591	23.5622	0.342901	0.732584	0.959258	0	0
hilic	pm2.5	lur	1	0	483.364	49.807	-0.178906	-0.456458	0.0986458	22.5294	-1.26921	0.205489	0.892049	-0.0724093	-0.289754	0.144936	22.706	-0.657389	0.51177	0.961983	-0.36609	-1.14184	0.409662	22.1403	-0.939324	0.350427	0.895002	0	0
hilic	pm2.5	lur	1	0	99.013	290.953	0.252712	-0.139411	0.644836	22.1171	1.26898	0.20557	0.892049	0.121459	-0.392458	0.635377	22.1025	0.466354	0.641526	0.970577	0.4922	-0.0949421	1.07934	22.1492	1.66859	0.0991577	0.855884	0	0
hilic	pm2.5	lur	1	0	159.001	84.348	0.0815669	-0.0450236	0.208157	20.5139	1.26871	0.205664	0.892049	0.100856	-0.0497898	0.251503	20.5045	1.32106	0.188157	0.952101	0.0657366	-0.19051	0.321983	20.5346	0.510623	0.611039	0.92951	0	0
hilic	pm2.5	lur	1	0	159.076	102.224	0.0758897	-0.0420064	0.193786	27.0339	1.26746	0.206112	0.892049	0.0525925	-0.0890965	0.194281	27.0467	0.73243	0.464859	0.961983	0.112303	-0.117611	0.342216	27.0057	0.972246	0.333895	0.895002	0	0
hilic	pm2.5	lur	1	0	145.98	22.838	0.112327	-0.062233	0.286886	19.3826	1.26704	0.206262	0.892049	0.108054	-0.107383	0.323492	19.4298	0.989693	0.323653	0.961983	0.105895	-0.197817	0.409607	19.2787	0.694004	0.489715	0.920114	0	0
hilic	pm2.5	lur	1	0	104.061	274.62	0.142437	-0.0791898	0.364065	20.0004	1.26547	0.206823	0.892049	0.246667	-0.0135493	0.506884	20.0503	1.87049	0.0630396	0.883312	-0.042037	-0.489339	0.405265	19.8906	-0.18706	0.852093	0.980706	0	0
hilic	pm2.5	lur	1	0	212.986	261.155	0.0947111	-0.0526925	0.242115	19.5607	1.26515	0.206935	0.892049	0.127062	-0.0489384	0.303063	19.5497	1.42456	0.156016	0.92383	0.0175987	-0.278636	0.313833	19.5848	0.118248	0.906171	0.992091	0	0
hilic	pm2.5	lur	1	0	163.06	105.755	0.215653	-0.120407	0.551713	17.884	1.26354	0.207514	0.892049	0.110205	-0.284291	0.5047	17.9829	0.551233	0.582158	0.963422	0.464438	-0.222189	1.15106	17.6662	1.34635	0.182041	0.855884	0	0
hilic	pm2.5	lur	1	0	99.512	286.961	0.100743	-0.0564995	0.257986	24.8908	1.26153	0.208237	0.892049	-0.0006357	-0.167258	0.165986	24.8952	-0.0075281	0.994002	0.996575	0.257864	-0.10174	0.617468	24.8812	1.4273	0.157432	0.855884	0	0
hilic	pm2.5	lur	1	0	306.829	65.904	-0.220347	-0.564642	0.123949	18.4657	-1.26016	0.208728	0.892049	-0.331996	-0.731189	0.0671964	18.4745	-1.64108	0.102528	0.885563	0.0979691	-0.618286	0.814224	18.4464	0.272252	0.786138	0.970036	0	0
hilic	pm2.5	lur	1	0	114.128	41.232	-0.349587	-0.896037	0.196863	19.7939	-1.25967	0.208906	0.892049	-0.276253	-0.929312	0.376806	19.5507	-0.834704	0.404991	0.961983	-0.685062	-1.71444	0.344321	20.3293	-1.32466	0.189104	0.855884	0	0
hilic	pm2.5	lur	1	0	161.038	78.775	0.101479	-0.0574086	0.260366	22.6958	1.25758	0.209658	0.892049	0.18214	-0.0088075	0.373087	22.7674	1.88222	0.0614207	0.883312	-0.117278	-0.425002	0.190447	22.5382	-0.758584	0.450358	0.906204	0	0
hilic	pm2.5	lur	1	0	426.323	39.219	-0.590301	-1.51535	0.33475	18.3906	-1.25649	0.210053	0.892049	-0.687585	-1.88705	0.511882	18.0806	-1.13114	0.259501	0.961983	-0.192056	-1.63262	1.24851	19.0733	-0.265366	0.791419	0.970036	0	0
hilic	pm2.5	lur	1	0	356.287	37.892	0.290094	-0.164899	0.745087	20.9463	1.25541	0.210444	0.892049	0.565233	-0.0092014	1.13967	20.8555	1.94162	0.053744	0.883312	-0.278849	-1.02997	0.472271	21.1462	-0.738941	0.462132	0.911684	0	0
hilic	pm2.5	lur	1	0	229.941	77.48	0.33114	-0.188713	0.850993	20.6846	1.25424	0.210867	0.892049	0.203558	-0.397072	0.804188	20.7655	0.668743	0.504517	0.961983	0.630363	-0.446956	1.70768	20.5065	1.16465	0.247663	0.88115	0	0
hilic	pm2.5	lur	1	0	315.133	42.336	0.390624	-0.222691	1.00394	19.855	1.25408	0.210925	0.892049	0.872511	0.163183	1.58184	20.2912	2.42718	0.0162022	0.883312	-0.669006	-1.91712	0.579104	18.8944	-1.06691	0.289262	0.895002	0	0
hilic	pm2.5	lur	1	0	208.154	34.707	0.256629	-0.146517	0.659774	17.6011	1.25341	0.211168	0.892049	0.0813332	-0.379633	0.542299	17.6924	0.348159	0.728128	0.977684	0.567812	-0.282454	1.41808	17.4	1.32923	0.187598	0.855884	0	0
hilic	pm2.5	lur	1	0	218.139	54.604	-0.0866757	-0.222908	0.0495566	26.5384	-1.25276	0.211405	0.892049	-0.15354	-0.306391	-0.0006889	26.4728	-1.98213	0.0489871	0.883312	0.0960784	-0.201941	0.394098	26.6829	0.641698	0.522927	0.920494	0	0
hilic	pm2.5	lur	1	0	249.108	93.074	0.150771	-0.0863443	0.387887	21.7436	1.25202	0.211676	0.892049	-0.0294664	-0.286011	0.227078	21.5624	-0.226643	0.820959	0.988245	0.495087	-0.0134138	1.00359	22.1425	1.93794	0.056203	0.855884	0	0
hilic	pm2.5	lur	1	0	812.612	41.458	0.0607259	-0.0348094	0.156261	25.708	1.25159	0.211832	0.892049	0.0424868	-0.0745457	0.159519	25.695	0.716351	0.474703	0.961983	0.145678	-0.0349341	0.32629	25.7366	1.60545	0.112384	0.855884	0	0
hilic	pm2.5	lur	1	0	456.353	38.956	-0.174275	-0.448464	0.0999133	19.1074	-1.25152	0.211857	0.892049	-0.152222	-0.478719	0.174275	18.7863	-0.919978	0.358816	0.961983	-0.145259	-0.67191	0.381392	19.8145	-0.548998	0.584555	0.927631	0	0
hilic	pm2.5	lur	1	0	149.107	113.713	0.137833	-0.0792555	0.354921	20.573	1.25016	0.212351	0.892049	0.165375	-0.10133	0.432079	20.5661	1.22354	0.222726	0.961983	0.0845976	-0.318225	0.48742	20.5883	0.418017	0.677068	0.944244	0	0
hilic	pm2.5	lur	1	0	646.684	65.142	0.0870617	-0.0501771	0.224301	23.3913	1.24911	0.212735	0.892049	0.181555	0.0322957	0.330814	23.3649	2.40019	0.0174064	0.883312	-0.11039	-0.423569	0.20279	23.4493	-0.701594	0.484994	0.920114	0	0
hilic	pm2.5	lur	1	0	112.021	131.855	0.304067	-0.175756	0.783891	19.6525	1.24778	0.21322	0.892049	0.495694	-0.120832	1.11222	19.512	1.5865	0.114381	0.891976	-0.085033	-0.849274	0.679208	19.9621	-0.221466	0.825301	0.980706	0	0
hilic	pm2.5	lur	1	0	343.046	87.54	0.213679	-0.124609	0.551967	20.9768	1.24373	0.214707	0.892049	0.139228	-0.309522	0.587979	20.8899	0.61221	0.541172	0.961983	0.201164	-0.264473	0.666801	21.1682	0.859911	0.39244	0.895002	0	0
hilic	pm2.5	lur	1	0	286.907	74.216	0.0821681	-0.0480397	0.212376	24.3766	1.24256	0.215137	0.892049	0.10539	-0.0601797	0.270961	24.3898	1.25602	0.210736	0.961983	0.00442199	-0.206039	0.214883	24.3475	0.0418212	0.966747	0.998705	0	0
hilic	pm2.5	lur	1	0	515.398	38.734	0.287907	-0.1685	0.744313	17.4978	1.24208	0.215312	0.892049	0.504802	-0.121704	1.13131	17.1398	1.58991	0.113609	0.891976	-0.0196847	-0.526277	0.486908	18.2862	-0.077343	0.938546	0.992091	0	0
hilic	pm2.5	lur	1	0	586.452	38.333	-0.171688	-0.443968	0.100592	18.6727	-1.24158	0.215498	0.892049	-0.138412	-0.502269	0.225445	18.2579	-0.750623	0.45386	0.961983	-0.131288	-0.489391	0.226815	19.5862	-0.729738	0.467709	0.91454	0	0
hilic	pm2.5	lur	1	0	176.103	102.372	0.0736394	-0.0433233	0.190602	28.375	1.23969	0.216194	0.892049	0.0526942	-0.0874638	0.192852	28.3868	0.741861	0.459138	0.961983	0.100031	-0.130686	0.330747	28.3491	0.862989	0.390755	0.895002	0	0
hilic	pm2.5	lur	1	0	493.367	38.126	0.344967	-0.20369	0.893625	17.4281	1.23802	0.216813	0.892049	0.609891	-0.178689	1.39847	16.8949	1.52611	0.128739	0.891976	-0.10321	-0.388187	0.181766	18.6022	-0.720883	0.473109	0.919047	0	0
hilic	pm2.5	lur	1	0	125.06	134.119	0.118041	-0.0698196	0.305902	20.4886	1.23722	0.217107	0.892049	0.230022	0.0014492	0.458596	20.4858	1.98574	0.0485802	0.883312	-0.151056	-0.485135	0.183024	20.4946	-0.899989	0.370861	0.895002	0	0
hilic	pm2.5	lur	1	0	141.959	295.358	0.163557	-0.0974377	0.424552	24.0257	1.23392	0.218332	0.892049	0.0921849	-0.212527	0.396897	24.0494	0.596964	0.551281	0.961983	0.369795	-0.156355	0.895945	23.9734	1.39895	0.165741	0.855884	0	0
hilic	pm2.5	lur	1	0	477.86	38.069	-0.186481	-0.484093	0.111131	18.3661	-1.23377	0.218389	0.892049	-0.181322	-0.594805	0.232161	17.9959	-0.865309	0.388021	0.961983	-0.132435	-0.433141	0.168271	19.1815	-0.876619	0.383351	0.895002	0	0
hilic	pm2.5	lur	1	0	85.078	112.111	0.196512	-0.117208	0.510232	25.1792	1.23338	0.218533	0.892049	0.290871	-0.081841	0.663583	25.1957	1.53994	0.12533	0.891976	-0.0948789	-0.700057	0.510299	25.1429	-0.312059	0.755818	0.964748	0	0
hilic	pm2.5	lur	1	0	244.923	66.065	0.179525	-0.107119	0.466168	21.2957	1.2332	0.218603	0.892049	0.129923	-0.234533	0.494379	21.2339	0.703428	0.482698	0.961983	0.21092	-0.271832	0.693672	21.4319	0.869648	0.387127	0.895002	0	0
hilic	pm2.5	lur	1	0	130.114	111.208	0.214571	-0.128181	0.557323	19.2975	1.23266	0.218805	0.892049	0.19413	-0.2329	0.62116	19.3693	0.897039	0.370896	0.961983	0.282643	-0.303126	0.868412	19.1396	0.960421	0.339773	0.895002	0	0
hilic	pm2.5	lur	1	0	196.984	63.51	0.352327	-0.210916	0.91557	19.6657	1.23169	0.219165	0.892049	-0.14438	-0.873165	0.584405	19.1749	-0.390917	0.696321	0.970577	1.5487	0.739133	2.35827	20.7467	3.80771	0.00027568	0.458959	0	0
hilic	pm2.5	lur	1	0	134.064	99.784	-0.0697726	-0.18147	0.0419243	23.4601	-1.22997	0.219807	0.892049	-0.0527627	-0.190377	0.084851	23.4991	-0.75656	0.450302	0.961983	-0.142565	-0.346093	0.0609625	23.3741	-1.39425	0.167151	0.855884	0	0
hilic	pm2.5	lur	1	0	583.41	37.232	-0.188112	-0.489285	0.113061	19.506	-1.22985	0.219852	0.892049	-0.233127	-0.645223	0.178969	19.2768	-1.11628	0.265791	0.961983	-0.0628371	-0.40663	0.280956	20.0109	-0.363806	0.716975	0.9517	0	0
hilic	pm2.5	lur	1	0	342.868	70.914	0.0574665	-0.0346549	0.149588	26.2646	1.2283	0.220431	0.892049	0.115092	0.00624378	0.22394	26.2741	2.08642	0.0383499	0.883312	-0.0761756	-0.263539	0.111188	26.2436	-0.809246	0.420804	0.905711	0	0
hilic	pm2.5	lur	1	0	94.546	144.087	0.0907633	-0.054806	0.236332	26.0957	1.2277	0.220658	0.892049	0.1089	-0.0681112	0.285911	26.0994	1.21396	0.226353	0.961983	0.0605566	-0.219001	0.340114	26.0874	0.431162	0.667525	0.941473	0	0
hilic	pm2.5	lur	1	0	280.263	29.715	0.156344	-0.0945378	0.407225	19.0983	1.22705	0.2209	0.892049	0.23666	-0.0686602	0.541981	18.9732	1.52949	0.127898	0.891976	0.0057187	-0.447403	0.458841	19.3738	0.0251208	0.980022	0.998828	0	0
hilic	pm2.5	lur	1	0	535.4	37.421	-0.306051	-0.797633	0.185531	19.4507	-1.22588	0.221339	0.892049	-0.498538	-1.19628	0.199203	19.0519	-1.40988	0.160301	0.92383	0.0634921	-0.316445	0.44343	20.329	0.332627	0.740297	0.95961	0	0
hilic	pm2.5	lur	1	0	515.978	87.946	-0.337365	-0.879315	0.204585	18.8741	-1.22572	0.2214	0.892049	-0.25061	-0.918191	0.416972	18.8403	-0.74075	0.459811	0.961983	-0.467955	-1.46234	0.526431	18.9486	-0.936698	0.351768	0.895002	0	0
hilic	pm2.5	lur	1	0	387.193	38.698	-0.378972	-0.987837	0.229892	17.8442	-1.22557	0.221457	0.892049	-0.182601	-0.90386	0.538658	18.0256	-0.499563	0.617993	0.968534	-0.738438	-1.90653	0.429648	17.4446	-1.25832	0.211983	0.855884	0	0
hilic	pm2.5	lur	1	0	241.079	88.75	0.330934	-0.201251	0.86312	18.3451	1.22442	0.22189	0.892049	0.446211	-0.18546	1.07788	18.5372	1.39389	0.16507	0.92402	0.0593598	-1.00149	1.12021	17.9221	0.111375	0.911601	0.992091	0	0
hilic	pm2.5	lur	1	0	176.029	88.191	0.171636	-0.105329	0.448601	22.0421	1.22021	0.223479	0.892049	0.222597	-0.11905	0.564244	21.9945	1.28564	0.20022	0.957234	-0.0498088	-0.55098	0.451363	22.1468	-0.19782	0.843694	0.980706	0	0
hilic	pm2.5	lur	1	0	565.912	38.058	-0.204729	-0.535455	0.125997	19.5312	-1.21888	0.22398	0.892049	-0.16439	-0.609416	0.280637	19.1157	-0.728897	0.467012	0.961983	-0.139501	-0.547126	0.268124	20.4462	-0.681187	0.497745	0.920114	0	0
hilic	pm2.5	lur	1	0	239.124	37.358	0.261165	-0.161235	0.683565	20.3994	1.21743	0.224533	0.892049	0.269312	-0.224579	0.763204	20.4813	1.07598	0.283378	0.961983	0.425798	-0.421663	1.27326	20.2189	1.00008	0.320325	0.895002	0	0
hilic	pm2.5	lur	1	0	209.583	125.592	0.3513	-0.217145	0.919745	17.0171	1.21686	0.224748	0.892049	0.302746	-0.420748	1.02624	16.7935	0.825698	0.410069	0.961983	0.65653	-0.287008	1.60007	17.5094	1.38499	0.169955	0.855884	0	0
hilic	pm2.5	lur	1	0	733.513	37.541	-0.329545	-0.864248	0.205157	18.4407	-1.21354	0.226012	0.892049	-0.340114	-1.07654	0.396314	18.0342	-0.911323	0.363344	0.961983	-0.132622	-0.720174	0.454931	19.3358	-0.449281	0.654459	0.939554	0	0
hilic	pm2.5	lur	1	0	142.901	70.814	0.0445408	-0.0277707	0.116852	23.6564	1.21284	0.226281	0.892049	0.0371966	-0.0485047	0.122898	23.6419	0.856434	0.392897	0.961983	0.0603142	-0.0955716	0.2162	23.6884	0.770129	0.44352	0.905711	0	0
hilic	pm2.5	lur	1	0	349.23	108.643	-0.154575	-0.405623	0.0964742	23.1828	-1.21236	0.226463	0.892049	-0.214995	-0.524749	0.0947591	23.3047	-1.36959	0.172522	0.940505	-0.0483186	-0.476021	0.379383	22.9144	-0.224865	0.822664	0.980706	0	0
hilic	pm2.5	lur	1	0	177.1	100.826	0.233691	-0.146138	0.613519	21.2147	1.21145	0.226811	0.892049	0.108068	-0.385298	0.601434	21.1897	0.432221	0.666098	0.970577	0.502491	-0.0807909	1.08577	21.2698	1.71475	0.0903115	0.855884	0	0
hilic	pm2.5	lur	1	0	331.92	86.479	0.215297	-0.134851	0.565445	18.0474	1.2107	0.227097	0.892049	0.109338	-0.275029	0.493705	18.0004	0.56131	0.575284	0.963422	0.443889	-0.287892	1.17567	18.1509	1.20738	0.230888	0.866323	0	0
hilic	pm2.5	lur	1	0	537.165	34.694	-0.138906	-0.364833	0.0870213	22.3228	-1.21061	0.227133	0.892049	-0.121596	-0.405756	0.162563	22.4014	-0.844379	0.399579	0.961983	-0.296599	-0.671486	0.0782877	22.1498	-1.57478	0.119303	0.855884	0	0
hilic	pm2.5	lur	1	0	145.035	295.018	0.202703	-0.126997	0.532403	18.9443	1.21058	0.227145	0.892049	0.196041	-0.178943	0.571026	19.0173	1.0316	0.303642	0.961983	0.203592	-0.498442	0.905627	18.7837	0.577236	0.565421	0.922887	0	0
hilic	pm2.5	lur	1	0	550.108	94.421	-0.242455	-0.637061	0.152151	17.8056	-1.20981	0.227436	0.892049	-0.0985928	-0.574609	0.377424	17.8935	-0.408697	0.683248	0.970577	-0.521446	-1.27041	0.22752	17.6118	-1.38579	0.16971	0.855884	0	0
hilic	pm2.5	lur	1	0	259.14	107.569	-0.399254	-1.04949	0.250985	17.8653	-1.209	0.227747	0.892049	-0.834971	-1.60885	-0.0610928	17.8561	-2.12901	0.0346135	0.883312	0.682599	-0.565621	1.93082	17.8857	1.08849	0.279687	0.895002	0	0
hilic	pm2.5	lur	1	0	130.136	49.642	0.255178	-0.160968	0.671324	17.7164	1.20739	0.228366	0.892049	0.283875	-0.277363	0.845112	17.9197	0.998063	0.319589	0.961983	0.216527	-0.31903	0.752084	17.2685	0.804742	0.423384	0.905711	0	0
hilic	pm2.5	lur	1	0	115.087	113.868	-0.14822	-0.39003	0.0935904	25.5603	-1.20693	0.228543	0.892049	-0.113844	-0.406786	0.179098	25.5776	-0.766844	0.444179	0.961983	-0.309774	-0.758618	0.13907	25.522	-1.37373	0.173412	0.855884	0	0
hilic	pm2.5	lur	1	0	194.038	59.759	-0.258108	-0.679643	0.163427	20.7612	-1.20564	0.229038	0.892049	-0.155383	-0.696759	0.385993	20.8967	-0.566347	0.571863	0.962318	-0.499622	-1.15215	0.152905	20.4628	-1.52403	0.131494	0.855884	0	0
hilic	pm2.5	lur	1	0	664.655	61.752	0.302087	-0.1914	0.795574	17.7986	1.20533	0.229158	0.892049	0.241864	-0.361926	0.845653	17.6074	0.79043	0.430317	0.961983	0.477	-0.408665	1.36266	18.2198	1.07201	0.286979	0.895002	0	0
hilic	pm2.5	lur	1	0	124.024	141.911	0.128436	-0.0814032	0.338275	20.0011	1.20518	0.229218	0.892049	0.183432	-0.0815445	0.448409	19.9727	1.36599	0.173648	0.940505	0.00497225	-0.354317	0.364261	20.0637	0.027546	0.978094	0.998705	0	0
hilic	pm2.5	lur	1	0	398.274	36.791	-0.34978	-0.921742	0.222183	17.6329	-1.20414	0.229617	0.892049	-0.157992	-0.878768	0.562783	17.5422	-0.432528	0.665876	0.970577	-0.792257	-1.72697	0.14246	17.8326	-1.68708	0.095532	0.855884	0	0
hilic	pm2.5	lur	1	0	266.121	44.626	0.213624	-0.135814	0.563063	22.5378	1.20374	0.229774	0.892049	0.200188	-0.2122	0.612577	22.5855	0.957878	0.339409	0.961983	0.232094	-0.466287	0.930474	22.4326	0.661486	0.510225	0.920114	0	0
hilic	pm2.5	lur	1	0	134.045	102.083	-0.0937804	-0.247202	0.0596414	25.6604	-1.20358	0.229833	0.892049	-0.1553	-0.330761	0.0201606	25.6655	-1.74651	0.082429	0.883312	0.0314207	-0.281861	0.344703	25.6491	0.199632	0.842281	0.980706	0	0
hilic	pm2.5	lur	1	0	808.751	80.346	-0.306112	-0.807107	0.194883	18.6236	-1.20309	0.230023	0.892049	-0.24951	-0.832875	0.333854	18.7653	-0.84397	0.399807	0.961983	-0.164716	-1.17969	0.850262	18.3115	-0.32302	0.747534	0.961695	0	0
hilic	pm2.5	lur	1	0	132.13	58.922	-0.0687998	-0.18154	0.0439401	24.4199	-1.2016	0.230599	0.892049	-0.0086609	-0.143703	0.126381	24.4864	-0.126554	0.899435	0.990901	-0.209068	-0.433291	0.0151545	24.2734	-1.85592	0.0671939	0.855884	0	0
hilic	pm2.5	lur	1	0	397.861	84.464	-0.287363	-0.758256	0.18353	16.4379	-1.2016	0.230599	0.892049	-0.496754	-1.07303	0.0795251	16.6147	-1.70093	0.090683	0.883312	-0.0004833	-0.838134	0.837168	16.0483	-0.0011483	0.999087	0.999602	0	0
hilic	pm2.5	lur	1	0	810.748	80.365	-0.292285	-0.771251	0.186681	18.1101	-1.20158	0.230607	0.892049	-0.473521	-1.00458	0.0575414	18.1615	-1.75943	0.0802036	0.883312	0.135082	-0.910749	1.18091	17.9971	0.25709	0.797778	0.972515	0	0
hilic	pm2.5	lur	1	0	190.119	93.248	-0.108393	-0.286083	0.0692961	22.2066	-1.20114	0.230779	0.892049	-0.185784	-0.394933	0.023366	22.2594	-1.75278	0.0813416	0.883312	0.117315	-0.21831	0.45294	22.0901	0.695744	0.48863	0.920114	0	0
hilic	pm2.5	lur	1	0	554.196	121.049	0.294987	-0.189186	0.779159	17.6445	1.19965	0.231357	0.892049	0.686161	0.0891116	1.28321	17.5742	2.26774	0.0245334	0.883312	-0.511418	-1.36355	0.340709	17.7992	-1.1946	0.235817	0.872132	0	0
hilic	pm2.5	lur	1	0	212.201	28.728	0.193377	-0.124472	0.511227	18.3297	1.19794	0.232019	0.892049	-0.0430391	-0.339626	0.253547	18.4082	-0.286345	0.774943	0.986872	0.658289	-0.107944	1.42452	18.1568	1.71004	0.091183	0.855884	0	0
hilic	pm2.5	lur	1	0	197.154	24.58	-0.112214	-0.296717	0.0722898	19.8566	-1.19755	0.232172	0.892049	-0.0717379	-0.298176	0.154701	19.9038	-0.625139	0.532672	0.961983	-0.278693	-0.616663	0.0592777	19.7526	-1.64133	0.104703	0.855884	0	0
hilic	pm2.5	lur	1	0	256.984	140.703	-0.102153	-0.270361	0.0660543	21.2382	-1.1958	0.232852	0.892049	-0.160803	-0.357963	0.0363568	21.1973	-1.60936	0.10929	0.891976	0.0374489	-0.306737	0.381635	21.3285	0.216569	0.829103	0.980706	0	0
hilic	pm2.5	lur	1	0	199.144	33.14	-0.207715	-0.549797	0.134366	19.5136	-1.19561	0.232926	0.892049	-0.0820079	-0.492321	0.328305	19.5944	-0.394383	0.693765	0.970577	-0.235035	-0.824239	0.354169	19.3357	-0.793994	0.429577	0.905711	0	0
hilic	pm2.5	lur	1	0	317.211	38.566	-0.350475	-0.927895	0.226945	17.8252	-1.19513	0.233112	0.892049	-0.141081	-0.8725	0.590337	18.3546	-0.380611	0.703941	0.970577	-0.631906	-1.59358	0.32977	16.6593	-1.3079	0.1947	0.855884	0	0
hilic	pm2.5	lur	1	0	595.435	37.818	0.379664	-0.245939	1.00527	17.8763	1.19495	0.233181	0.892049	0.568149	-0.283467	1.41977	17.3985	1.31643	0.189705	0.952101	-0.0063037	-0.69431	0.681703	18.9285	-0.0182369	0.985496	0.999158	0	0
hilic	pm2.5	lur	1	0	659.361	85.403	0.348327	-0.226069	0.922723	15.1941	1.19406	0.233529	0.892049	0.507097	-0.228466	1.24266	15.218	1.36035	0.175422	0.940505	0.0201501	-0.832017	0.872317	15.1415	0.0470655	0.96258	0.998705	0	0
hilic	pm2.5	lur	1	0	190.077	58.161	-0.117665	-0.311718	0.0763887	22.2272	-1.19392	0.233584	0.892049	-0.0554696	-0.272252	0.161313	22.3127	-0.504904	0.614244	0.967904	-0.247203	-0.67081	0.176403	22.0389	-1.16156	0.248911	0.88115	0	0
hilic	pm2.5	lur	1	0	199.014	163.467	-0.117592	-0.311607	0.0764225	20.8324	-1.19342	0.233779	0.892049	-0.235078	-0.4858	0.0156445	20.7758	-1.85011	0.0659375	0.883312	0.0929566	-0.208775	0.394688	20.957	0.613211	0.541498	0.920494	0	0
hilic	pm2.5	lur	1	0	577.909	55.887	0.305269	-0.198659	0.809197	18.3588	1.19279	0.234025	0.892049	0.182815	-0.448471	0.814102	17.9945	0.571432	0.56842	0.961983	0.58024	-0.273159	1.43364	19.161	1.35334	0.179808	0.855884	0	0
hilic	pm2.5	lur	1	0	212.839	68.883	0.033038	-0.0215663	0.0876424	24.7581	1.19135	0.234592	0.892049	0.0082806	-0.0558485	0.0724097	24.7563	0.254791	0.799175	0.986872	0.108167	-0.0125135	0.228848	24.762	1.78405	0.0782541	0.855884	0	0
hilic	pm2.5	lur	1	0	258.818	71.593	0.0407761	-0.0267553	0.108307	27.0153	1.18891	0.235546	0.892049	0.0272225	-0.0555292	0.109974	27.0089	0.649126	0.517084	0.961983	0.0761015	-0.0623612	0.214564	27.0295	1.09398	0.277286	0.895002	0	0
hilic	pm2.5	lur	1	0	214.836	68.914	0.0334149	-0.0219588	0.0887887	24.7431	1.18819	0.235829	0.892049	0.00648121	-0.0580701	0.0710325	24.7417	0.198121	0.843174	0.989597	0.114356	-0.0093961	0.238108	24.7462	1.83932	0.069625	0.855884	0	0
hilic	pm2.5	lur	1	0	196.074	71.821	0.578384	-0.381134	1.5379	15.845	1.1869	0.236338	0.892049	0.310996	-0.829781	1.45177	16.0647	0.537938	0.591284	0.964792	1.41795	-0.452908	3.28882	15.361	1.50859	0.135393	0.855884	0	0
hilic	pm2.5	lur	1	0	132.041	146.696	0.1617	-0.106599	0.43	20.0443	1.1867	0.236416	0.892049	0.196032	-0.136315	0.528379	20.0018	1.16389	0.246008	0.961983	0.158093	-0.325396	0.641581	20.1379	0.650842	0.517037	0.920494	0	0
hilic	pm2.5	lur	1	0	427.361	37.997	-0.0996444	-0.265137	0.0658478	23.9834	-1.18557	0.236863	0.892049	-0.162594	-0.372269	0.0470814	23.9904	-1.53015	0.127734	0.891976	0.0190662	-0.259072	0.297204	23.9681	0.136444	0.891818	0.991882	0	0
hilic	pm2.5	lur	1	0	105.113	53.982	-0.138713	-0.369808	0.0923829	23.7482	-1.18189	0.238318	0.892049	-0.103879	-0.28587	0.078111	23.8073	-1.12631	0.261533	0.961983	-0.171387	-0.813994	0.47122	23.6179	-0.530863	0.597002	0.929487	0	0
hilic	pm2.5	lur	1	0	235.092	132.117	0.163814	-0.109185	0.436813	20.3182	1.18152	0.238464	0.892049	0.136559	-0.192659	0.465777	20.2998	0.818493	0.414158	0.961983	0.331281	-0.186217	0.848779	20.3589	1.2742	0.206327	0.855884	0	0
hilic	pm2.5	lur	1	0	99.531	227.928	0.156764	-0.104701	0.418229	27.198	1.18055	0.238849	0.892049	0.222451	-0.116325	0.561228	27.1814	1.29569	0.196743	0.957234	-0.0015528	-0.416552	0.413447	27.2345	-0.0074475	0.994077	0.999568	0	0
hilic	pm2.5	lur	1	0	171.138	25.871	0.0730969	-0.0488566	0.19505	20.1203	1.1802	0.238987	0.892049	0.130463	-0.0194837	0.280409	20.1214	1.71683	0.0877297	0.883312	-0.0729695	-0.298828	0.152889	20.118	-0.643065	0.522044	0.920494	0	0
hilic	pm2.5	lur	1	0	233.872	253.929	0.20171	-0.134851	0.538271	20.4283	1.18009	0.239031	0.892049	0.0662308	-0.365068	0.49753	20.3642	0.303012	0.762231	0.984574	0.517561	-0.0106232	1.04575	20.5694	1.95041	0.0546732	0.855884	0	0
hilic	pm2.5	lur	1	0	383.315	30.071	-0.127073	-0.339117	0.08497	18.2174	-1.18	0.239067	0.892049	-0.212559	-0.461403	0.0362846	18.3219	-1.68551	0.0936232	0.883312	0.0274891	-0.395232	0.45021	17.9874	0.129437	0.897341	0.992091	0	0
hilic	pm2.5	lur	1	0	253.216	278.672	0.311739	-0.208454	0.831932	17.8457	1.17999	0.239071	0.892049	0.00577185	-0.567999	0.579543	17.8931	0.0198497	0.984185	0.996575	0.991194	-0.159509	2.1419	17.7412	1.71453	0.0903512	0.855884	0	0
hilic	pm2.5	lur	1	0	126.895	76.01	0.210271	-0.140819	0.56136	18.4093	1.17926	0.239358	0.892049	0.355103	-0.0609357	0.771142	18.2765	1.68422	0.0938726	0.883312	-0.130099	-0.823391	0.563193	18.7018	-0.373514	0.709766	0.948018	0	0
hilic	pm2.5	lur	1	0	405.096	96.144	-0.297715	-0.795063	0.199633	18.6575	-1.17867	0.239596	0.892049	-0.312452	-0.94521	0.320305	18.5877	-0.974372	0.33118	0.961983	-0.266816	-1.09856	0.56493	18.811	-0.638516	0.524984	0.920494	0	0
hilic	pm2.5	lur	1	0	576.699	66.684	0.0493613	-0.0332058	0.131928	25.0309	1.17715	0.240201	0.892049	0.095552	-0.0037182	0.194822	25.0183	1.89932	0.0591213	0.883312	-0.055666	-0.223431	0.112099	25.0588	-0.660449	0.510887	0.920114	0	0
hilic	pm2.5	lur	1	0	157.974	22.12	-0.149216	-0.399184	0.100752	17.1721	-1.17539	0.240902	0.892049	-0.0739022	-0.361283	0.213479	17.2607	-0.507431	0.612474	0.967904	-0.303336	-0.816499	0.209827	16.977	-1.17657	0.242898	0.877873	0	0
hilic	pm2.5	lur	1	0	140.069	74.767	0.068339	-0.0462326	0.182911	30.7732	1.17447	0.241268	0.892049	0.0722734	-0.0695127	0.214059	30.7395	1.00583	0.31585	0.961983	0.0268858	-0.186835	0.240606	30.8472	0.250396	0.802931	0.9738	0	0
hilic	pm2.5	lur	1	0	235.206	280.176	-0.358203	-0.959452	0.243047	18.2768	-1.17307	0.241828	0.892049	-0.307335	-1.01906	0.404391	18.2068	-0.852075	0.395305	0.961983	-0.653933	-1.82085	0.512987	18.4311	-1.11543	0.268047	0.887495	0	0
hilic	pm2.5	lur	1	0	226.862	65.767	0.149661	-0.101573	0.400895	21.783	1.17296	0.241874	0.892049	0.0886276	-0.211025	0.38828	21.7942	0.583618	0.560208	0.961983	0.313619	-0.159982	0.78722	21.7584	1.31807	0.191288	0.855884	0	0
hilic	pm2.5	lur	1	0	1154.24	67.712	0.160274	-0.108807	0.429355	21.0202	1.17282	0.241928	0.892049	0.131093	-0.161133	0.42332	21.0517	0.885197	0.377232	0.961983	0.0906884	-0.504282	0.685658	20.9507	0.303394	0.762387	0.964868	0	0
hilic	pm2.5	lur	1	0	235.206	124.662	-0.131518	-0.352539	0.089503	20.8448	-1.17166	0.242392	0.892049	-0.0812338	-0.337329	0.174861	20.8835	-0.625912	0.532165	0.961983	-0.186691	-0.642702	0.26932	20.7595	-0.814889	0.417585	0.905711	0	0
hilic	pm2.5	lur	1	0	107.047	97.901	-0.191462	-0.513543	0.130618	17.2966	-1.1705	0.24286	0.892049	-0.2758	-0.655463	0.103864	17.3725	-1.43342	0.153473	0.923119	-0.0521313	-0.687992	0.58373	17.1292	-0.163188	0.870787	0.984419	0	0
hilic	pm2.5	lur	1	0	147.113	112.896	0.183196	-0.125111	0.491503	29.3738	1.16999	0.243063	0.892049	0.192817	-0.171041	0.556676	29.4735	1.04566	0.297119	0.961983	0.0987248	-0.471708	0.669157	29.1544	0.344487	0.731396	0.958721	0	0
hilic	pm2.5	lur	1	0	181.053	49.871	0.238587	-0.163086	0.64026	19.9037	1.16957	0.243234	0.892049	0.246616	-0.259707	0.752939	19.7756	0.961109	0.337787	0.961983	0.201463	-0.484156	0.887081	20.1857	0.584874	0.560299	0.921156	0	0
hilic	pm2.5	lur	1	0	260.027	61.477	-0.159005	-0.42684	0.108829	21.4449	-1.16895	0.243482	0.892049	-0.107137	-0.445307	0.231033	21.4255	-0.625147	0.532667	0.961983	-0.247226	-0.711831	0.217379	21.4879	-1.05916	0.292755	0.895002	0	0
hilic	pm2.5	lur	1	0	645.966	37.689	-0.179082	-0.481045	0.12288	18.3906	-1.16775	0.243964	0.892049	-0.235176	-0.656403	0.186051	17.9693	-1.10168	0.272072	0.961983	-0.0213335	-0.319173	0.276506	19.3184	-0.142571	0.886992	0.988715	0	0
hilic	pm2.5	lur	1	0	358.057	88.539	0.268491	-0.184665	0.721647	20.0841	1.16663	0.244417	0.892049	0.282809	-0.293693	0.859311	20.063	0.967989	0.334349	0.961983	0.204702	-0.554793	0.964197	20.1307	0.536472	0.593139	0.927711	0	0
hilic	pm2.5	lur	1	0	748.53	42.39	-0.117088	-0.314842	0.0806648	23.22	-1.16585	0.244732	0.892049	-0.16114	-0.429513	0.107234	23.0033	-1.18479	0.237663	0.961983	0.010242	-0.237402	0.257886	23.6972	0.0823201	0.9346	0.992091	0	0
hilic	pm2.5	lur	1	0	529.414	37.92	0.475888	-0.327906	1.27968	16.1616	1.16576	0.244766	0.892049	0.425093	-0.680993	1.53118	15.4094	0.758356	0.44923	0.961983	0.433424	-0.426533	1.29338	17.818	1.0032	0.318828	0.895002	0	0
hilic	pm2.5	lur	1	0	384.945	75.296	0.149135	-0.103207	0.401478	21.8955	1.1637	0.245601	0.892049	0.213364	-0.0958757	0.522604	21.8963	1.36146	0.175071	0.940505	-0.0036703	-0.473668	0.466327	21.8936	-0.0155437	0.987638	0.999189	0	0
hilic	pm2.5	lur	1	0	209.117	32.046	-0.182272	-0.490841	0.126298	19.7643	-1.1631	0.245843	0.892049	-0.269251	-0.632006	0.0935049	19.8006	-1.46461	0.144773	0.916187	-0.102939	-0.713474	0.507596	19.6844	-0.335598	0.738063	0.95961	0	0
hilic	pm2.5	lur	1	0	852.607	71.77	-0.161412	-0.434674	0.11185	20.9747	-1.16308	0.245853	0.892049	-0.11886	-0.446591	0.208872	20.9163	-0.71564	0.475141	0.961983	-0.26005	-0.791288	0.271187	21.1034	-0.974358	0.332852	0.895002	0	0
hilic	pm2.5	lur	1	0	198.149	30.058	-0.13442	-0.362094	0.093253	19.4799	-1.16253	0.246074	0.892049	-0.0758671	-0.359851	0.208117	19.4665	-0.527154	0.598736	0.966918	-0.325987	-0.728471	0.0764959	19.5092	-1.61214	0.110919	0.855884	0	0
hilic	pm2.5	lur	1	0	228.045	72.001	0.192864	-0.13429	0.520019	21.3991	1.16078	0.246784	0.892049	0.413515	0.0474689	0.779562	21.4633	2.22912	0.0270431	0.883312	-0.258398	-0.944029	0.427234	21.2579	-0.75015	0.455392	0.910009	0	0
hilic	pm2.5	lur	1	0	222.006	66.857	-0.080486	-0.217062	0.0560901	21.9811	-1.16037	0.24695	0.892049	-0.107893	-0.267815	0.0520287	22.032	-1.33126	0.184786	0.952101	0.00665911	-0.276379	0.289697	21.8689	0.0468297	0.962767	0.998705	0	0
hilic	pm2.5	lur	1	0	226.888	84.099	-0.360841	-0.973286	0.251604	20.6585	-1.16011	0.247056	0.892049	-0.153394	-0.864363	0.557576	20.7435	-0.425731	0.670813	0.970577	-0.849313	-2.05678	0.35815	20.4715	-1.40005	0.165412	0.855884	0	0
hilic	pm2.5	lur	1	0	512.467	36.903	-0.314803	-0.849201	0.219596	17.4926	-1.15991	0.247137	0.892049	-0.0817547	-0.736695	0.573186	17.604	-0.246314	0.80572	0.987223	-0.628836	-1.60029	0.342617	17.2473	-1.28844	0.201351	0.855884	0	0
hilic	pm2.5	lur	1	0	614.817	79.608	-0.20323	-0.548351	0.141891	23.1537	-1.15949	0.247308	0.892049	-0.3123	-0.724955	0.100355	23.0699	-1.49336	0.137095	0.915223	-0.0621135	-0.730734	0.606507	23.3382	-0.184908	0.853775	0.980706	0	0
hilic	pm2.5	lur	1	0	613.522	36.603	-0.389529	-1.05114	0.27208	16.8179	-1.15928	0.247392	0.892049	-0.253564	-1.05033	0.543203	16.7033	-0.627963	0.530824	0.961983	-0.69956	-1.94781	0.548692	17.0702	-1.11551	0.268014	0.887495	0	0
hilic	pm2.5	lur	1	0	274.975	89.947	0.307553	-0.215174	0.83028	19.5547	1.1585	0.24771	0.892049	0.469267	-0.136039	1.07457	19.4717	1.52976	0.127832	0.891976	0.139852	-0.936781	1.21649	19.7374	0.258555	0.796651	0.97179	0	0
hilic	pm2.5	lur	1	0	149.027	101.243	-0.290796	-0.785524	0.203933	16.6516	-1.15737	0.248171	0.892049	-0.379619	-1.00912	0.24988	16.6446	-1.18996	0.23563	0.961983	0.0376855	-0.786697	0.862068	16.6671	0.0909903	0.927731	0.992091	0	0
hilic	pm2.5	lur	1	0	459.778	77.313	-0.323053	-0.872722	0.226615	18.2755	-1.15724	0.248223	0.892049	-0.228078	-0.906083	0.449927	18.3181	-0.663787	0.507676	0.961983	-0.640245	-1.62058	0.340089	18.1819	-1.29994	0.197402	0.855884	0	0
hilic	pm2.5	lur	1	0	351.136	106.61	-0.151778	-0.410088	0.106533	20.4063	-1.15695	0.248341	0.892049	-0.089422	-0.400236	0.221392	20.4689	-0.567703	0.570944	0.962318	-0.180504	-0.641007	0.279999	20.2686	-0.780198	0.437605	0.905711	0	0
hilic	pm2.5	lur	1	0	425.345	38.361	-0.0853196	-0.230582	0.059943	23.4199	-1.1565	0.248525	0.892049	-0.100538	-0.284765	0.0836894	23.415	-1.07685	0.282991	0.961983	-0.0353826	-0.278203	0.207438	23.4308	-0.290038	0.772547	0.965845	0	0
hilic	pm2.5	lur	1	0	243.929	71.513	0.237102	-0.167572	0.641775	20.175	1.15367	0.249684	0.892049	0.176055	-0.331278	0.683388	20.0845	0.684751	0.494382	0.961983	0.230948	-0.460699	0.922595	20.3745	0.66463	0.508223	0.920114	0	0
hilic	pm2.5	lur	1	0	224.971	247.393	0.189326	-0.133927	0.51258	16.933	1.15324	0.249859	0.892049	0.213889	-0.17652	0.604297	16.9698	1.08105	0.281121	0.961983	0.336582	-0.25792	0.931083	16.852	1.12691	0.263193	0.886342	0	0
hilic	pm2.5	lur	1	0	522.134	48.013	-0.305022	-0.826599	0.216555	19.0786	-1.1515	0.250573	0.892049	-0.150591	-0.660288	0.359107	19.7352	-0.582994	0.560627	0.961983	-0.863796	-2.175	0.447408	17.6325	-1.31127	0.193565	0.855884	0	0
hilic	pm2.5	lur	1	0	430.389	35.596	0.312653	-0.222063	0.847369	17.2385	1.1513	0.250653	0.892049	0.204383	-0.450587	0.859353	17.3664	0.615746	0.53884	0.961983	0.694277	-0.284256	1.67281	16.9569	1.41224	0.161807	0.855884	0	0
hilic	pm2.5	lur	1	0	345.075	101.381	-0.214205	-0.58059	0.15218	19.4772	-1.15118	0.250705	0.892049	-0.129228	-0.542019	0.283563	19.6931	-0.617739	0.537528	0.961983	-0.31038	-1.07205	0.451286	19.0017	-0.811109	0.41974	0.905711	0	0
hilic	pm2.5	lur	1	0	207.056	125.936	0.145818	-0.103774	0.39541	19.5283	1.15035	0.251042	0.892049	0.13379	-0.178976	0.446556	19.4837	0.844079	0.399746	0.961983	0.181168	-0.255908	0.618245	19.6268	0.82504	0.411833	0.905711	0	0
hilic	pm2.5	lur	1	0	294.032	75.084	-0.291204	-0.789737	0.20733	21.0738	-1.15015	0.251128	0.892049	0.135626	-0.450196	0.721448	21.1631	0.45683	0.648344	0.970577	-1.23574	-2.21634	-0.255146	20.8771	-2.50835	0.0141775	0.855884	0	0
hilic	pm2.5	lur	1	0	395.939	85.321	0.237475	-0.1691	0.64405	21.7093	1.15008	0.251154	0.892049	-0.0553319	-0.595871	0.485207	21.6586	-0.201989	0.840154	0.988245	0.887308	0.336315	1.4383	21.8208	3.20537	0.00194697	0.855884	0	0
hilic	pm2.5	lur	1	0	130.098	106.111	0.1658	-0.118068	0.449667	23.9832	1.15006	0.251165	0.892049	0.176496	-0.173572	0.526564	23.9188	0.994859	0.321141	0.961983	0.129429	-0.376364	0.635223	24.1251	0.509342	0.611932	0.92951	0	0
hilic	pm2.5	lur	1	0	368.871	69	0.0601602	-0.0428642	0.163185	23.3198	1.14979	0.251273	0.892049	0.0842435	-0.0511935	0.219681	23.3066	1.22737	0.221285	0.961983	0.0386776	-0.119334	0.196689	23.3487	0.487216	0.627454	0.93368	0	0
hilic	pm2.5	lur	1	0	172.996	294.892	-0.183373	-0.497532	0.130785	19.2314	-1.14931	0.251471	0.892049	-0.329737	-0.711189	0.0517149	19.2432	-1.70571	0.0897866	0.883312	0.25078	-0.330118	0.831678	19.2053	0.859297	0.392777	0.895002	0	0
hilic	pm2.5	lur	1	0	159.039	102.926	0.289993	-0.206918	0.786905	18.0653	1.14911	0.251556	0.892049	0.307592	-0.302959	0.918143	18.209	0.994102	0.321508	0.961983	0.242688	-0.66522	1.1506	17.749	0.532055	0.596181	0.929487	0	0
hilic	pm2.5	lur	1	0	112.896	64.643	0.068685	-0.0490332	0.186403	25.2665	1.14887	0.251655	0.892049	0.00414234	-0.13304	0.141324	25.2468	0.0595837	0.952553	0.991368	0.238377	-0.0011111	0.477864	25.3098	1.98121	0.0510466	0.855884	0	0
hilic	pm2.5	lur	1	0	115.063	51.825	-0.0542117	-0.147127	0.038704	25.6683	-1.14883	0.251671	0.892049	-0.100008	-0.212424	0.0124081	25.6957	-1.75543	0.0808863	0.883312	0.06479	-0.115077	0.244657	25.6078	0.716978	0.475502	0.919047	0	0
hilic	pm2.5	lur	1	0	279.093	276.529	0.192776	-0.137722	0.523274	19.7735	1.14851	0.251802	0.892049	0.377307	-0.0183807	0.772995	19.7926	1.88157	0.0615088	0.883312	-0.0968667	-0.727688	0.533955	19.7316	-0.305646	0.760678	0.964868	0	0
hilic	pm2.5	lur	1	0	159.117	28.25	-0.253195	-0.687656	0.181267	18.1188	-1.1475	0.252216	0.892049	-0.156036	-0.646399	0.334327	18.229	-0.627894	0.530869	0.961983	-0.579008	-1.47866	0.320645	17.8759	-1.28103	0.20393	0.855884	0	0
hilic	pm2.5	lur	1	0	247.144	52.941	-0.219293	-0.596087	0.157501	25.4293	-1.14597	0.25285	0.892049	-0.10104	-0.540584	0.338504	25.4069	-0.453596	0.650666	0.970577	-0.649666	-1.37425	0.0749183	25.4787	-1.78464	0.0781576	0.855884	0	0
hilic	pm2.5	lur	1	0	152.983	134.281	-0.149928	-0.407622	0.107767	21.5312	-1.14559	0.253007	0.892049	-0.282368	-0.602752	0.0380165	21.5629	-1.73909	0.0837287	0.883312	0.190716	-0.242579	0.62401	21.4614	0.876099	0.383632	0.895002	0	0
hilic	pm2.5	lur	1	0	108.054	97.63	-0.207291	-0.563767	0.149185	18.8082	-1.14499	0.253255	0.892049	-0.187036	-0.604961	0.230888	18.7999	-0.883093	0.378364	0.961983	-0.35054	-1.05949	0.35841	18.8267	-0.984174	0.328034	0.895002	0	0
hilic	pm2.5	lur	1	0	493.062	119.753	0.236158	-0.169996	0.642311	17.919	1.14489	0.253296	0.892049	0.190287	-0.290835	0.67141	18.0031	0.780428	0.436164	0.961983	0.411489	-0.39466	1.21764	17.7336	1.016	0.312731	0.895002	0	0
hilic	pm2.5	lur	1	0	248.047	150.987	-0.242121	-0.658894	0.174653	18.978	-1.14389	0.253711	0.892049	-0.0436302	-0.577703	0.490443	18.8829	-0.1612	0.872117	0.989597	-0.557385	-1.20896	0.094186	19.1875	-1.70272	0.0925512	0.855884	0	0
hilic	pm2.5	lur	1	0	188.979	22.008	0.0491128	-0.0355476	0.133773	20.3801	1.14226	0.254384	0.892049	0.0699574	-0.037244	0.177159	20.4159	1.28769	0.199507	0.957234	-0.0007173	-0.153063	0.151628	20.3015	-0.009372	0.992546	0.999568	0	0
hilic	pm2.5	lur	1	0	191.139	112.766	0.11896	-0.0861064	0.324027	21.4886	1.14224	0.254392	0.892049	0.075985	-0.170923	0.322893	21.4819	0.607256	0.544447	0.961983	0.225785	-0.171864	0.623435	21.5035	1.13018	0.261822	0.886342	0	0
hilic	pm2.5	lur	1	0	746.566	42.093	-0.309578	-0.843345	0.22419	21.61	-1.14201	0.25449	0.892049	-0.30165	-1.0328	0.429498	21.3945	-0.814097	0.416665	0.961983	-0.126352	-0.673306	0.420601	22.0848	-0.459815	0.646912	0.937675	0	0
hilic	pm2.5	lur	1	0	127.03	48.917	0.193555	-0.140189	0.527299	21.2768	1.14194	0.254519	0.892049	0.421863	0.0425635	0.801163	21.2841	2.19466	0.0294681	0.883312	-0.279168	-0.971592	0.413255	21.2607	-0.802499	0.424672	0.905711	0	0
hilic	pm2.5	lur	1	0	550.406	37.833	0.276618	-0.200374	0.753609	20.2763	1.14188	0.254543	0.892049	0.397927	-0.287713	1.08357	19.9265	1.14521	0.253643	0.961983	-0.0299974	-0.313598	0.253603	21.0468	-0.210537	0.833791	0.980706	0	0
hilic	pm2.5	lur	1	0	255.875	255.203	0.221173	-0.161093	0.603439	18.3304	1.13925	0.255637	0.894729	0.0364815	-0.396016	0.468979	18.2993	0.166443	0.867995	0.989597	0.72419	-0.0636214	1.512	18.3989	1.8297	0.0710663	0.855884	0	0
hilic	pm2.5	lur	1	0	278.183	269.785	0.126951	-0.0926756	0.346578	19.1606	1.13816	0.25609	0.895163	0.259684	0.00777677	0.511591	19.265	2.03415	0.0434042	0.883312	-0.26485	-0.710227	0.180526	18.9308	-1.18365	0.2401	0.877673	0	0
hilic	pm2.5	lur	1	0	285.981	75.718	-0.0881152	-0.240728	0.0644975	22.7727	-1.13687	0.256627	0.895318	-0.0536917	-0.224656	0.117272	22.8567	-0.619699	0.53624	0.961983	-0.16702	-0.504037	0.169998	22.5876	-0.986428	0.326934	0.895002	0	0
hilic	pm2.5	lur	1	0	175.119	109.23	-0.086085	-0.235313	0.0631427	31.2419	-1.13587	0.257045	0.895318	-0.101076	-0.289109	0.0869573	31.3039	-1.0607	0.290249	0.961983	-0.0731346	-0.319677	0.173408	31.1053	-0.590448	0.556575	0.920494	0	0
hilic	pm2.5	lur	1	0	265.118	44.698	0.131358	-0.0966904	0.359405	25.5841	1.13417	0.257754	0.895318	0.0933399	-0.18265	0.36933	25.6011	0.667347	0.505406	0.961983	0.225274	-0.205213	0.655762	25.5466	1.0416	0.300773	0.895002	0	0
hilic	pm2.5	lur	1	0	207.051	110.937	0.173226	-0.12751	0.473961	19.2558	1.13417	0.257755	0.895318	0.144899	-0.197141	0.486939	19.2353	0.835924	0.404306	0.961983	0.39579	-0.235649	1.02723	19.3008	1.24762	0.215854	0.855884	0	0
hilic	pm2.5	lur	1	0	506.625	67.62	0.0378239	-0.0278724	0.10352	24.7335	1.13364	0.257977	0.895318	0.00156443	-0.0796435	0.0827723	24.7265	0.0380134	0.969719	0.994389	0.137509	0.00978683	0.265231	24.749	2.14297	0.0351932	0.855884	0	0
hilic	pm2.5	lur	1	0	412.764	65.656	-0.310096	-0.849576	0.229384	18.1426	-1.13181	0.258747	0.895318	-0.166904	-0.789679	0.455871	18.1412	-0.528826	0.597577	0.966918	-0.727535	-1.85043	0.395357	18.1458	-1.28963	0.20094	0.855884	0	0
hilic	pm2.5	lur	1	0	550.907	38.138	-0.188804	-0.517343	0.139736	18.9135	-1.13155	0.258854	0.895318	-0.187747	-0.635177	0.259684	18.4341	-0.82799	0.408772	0.961983	-0.0857541	-0.47152	0.300011	19.9693	-0.442468	0.659359	0.940557	0	0
hilic	pm2.5	lur	1	0	497.548	49.354	0.20448	-0.151624	0.560583	20.6011	1.13064	0.259236	0.895318	0.214141	-0.173566	0.601849	20.7398	1.08987	0.277228	0.961983	0.271993	-0.496489	1.04047	20.2956	0.704488	0.4832	0.920114	0	0
hilic	pm2.5	lur	1	0	352.897	76.141	0.0407506	-0.0302214	0.111723	26.672	1.13057	0.259266	0.895318	0.0744529	-0.012368	0.161274	26.6831	1.69214	0.0923504	0.883312	-0.0589743	-0.200522	0.0825738	26.6477	-0.829295	0.409436	0.905711	0	0
hilic	pm2.5	lur	1	0	413.266	68.188	0.0506642	-0.0376043	0.138933	24.3488	1.13018	0.259431	0.895318	0.0627191	-0.0443919	0.16983	24.3388	1.15543	0.249446	0.961983	0.00995787	-0.159814	0.17973	24.371	0.116748	0.907356	0.992091	0	0
hilic	pm2.5	lur	1	0	101.06	30.288	-0.19706	-0.540957	0.146837	20.8908	-1.12829	0.260226	0.89692	-0.190607	-0.625235	0.244021	20.8229	-0.865363	0.387991	0.961983	-0.297964	-0.875178	0.27925	21.0402	-1.02749	0.307325	0.895002	0	0
hilic	pm2.5	lur	1	0	174.02	103.264	0.13023	-0.0977437	0.358205	19.8651	1.12481	0.261696	0.900846	0.0515864	-0.228843	0.332016	19.9051	0.362986	0.717041	0.972575	0.331217	-0.082536	0.744971	19.7772	1.59339	0.115066	0.855884	0	0
hilic	pm2.5	lur	1	0	781.481	69.831	-0.290356	-0.799391	0.218679	20.8295	-1.12314	0.262402	0.901601	-0.362973	-0.914816	0.18887	20.9203	-1.29789	0.195987	0.957234	-0.222736	-1.3232	0.877725	20.6294	-0.402871	0.688131	0.944899	0	0
hilic	pm2.5	lur	1	0	301.007	89.235	-0.22193	-0.611149	0.16729	19.5269	-1.12272	0.26258	0.901601	-0.41435	-0.867826	0.0391249	19.4681	-1.80299	0.0730632	0.883312	0.0846955	-0.699759	0.86915	19.6564	0.214903	0.830396	0.980706	0	0
hilic	pm2.5	lur	1	0	417.336	38.169	-0.22397	-0.617327	0.169387	19.8085	-1.12113	0.263257	0.90215	-0.199154	-0.667674	0.269365	19.8907	-0.838764	0.402714	0.961983	-0.186028	-0.921521	0.549466	19.6274	-0.503441	0.616055	0.931629	0	0
hilic	pm2.5	lur	1	0	164.107	28.641	-0.185306	-0.510947	0.140334	18.8403	-1.12048	0.263533	0.90215	-0.104148	-0.511588	0.303292	18.8627	-0.504388	0.614605	0.967904	-0.273514	-0.832174	0.285147	18.791	-0.974499	0.332783	0.895002	0	0
hilic	pm2.5	lur	1	0	186.149	33.315	0.0711867	-0.0539779	0.196351	20.2202	1.11987	0.26379	0.90215	0.130998	-0.0152165	0.277213	20.2415	1.76788	0.0787757	0.883312	-0.079919	-0.337831	0.177993	20.1732	-0.616779	0.539154	0.920494	0	0
hilic	pm2.5	lur	1	0	162.1	75.896	0.367439	-0.279018	1.01389	18.378	1.11917	0.264088	0.90215	0.102899	-0.673875	0.879672	18.2621	0.261393	0.794088	0.986872	0.815112	-0.421153	2.05138	18.6333	1.31237	0.193195	0.855884	0	0
hilic	pm2.5	lur	1	0	449.344	37.561	-0.314186	-0.867315	0.238943	18.4745	-1.11844	0.2644	0.90215	-0.465856	-1.12644	0.194726	18.2234	-1.39156	0.165772	0.92402	0.181209	-0.845974	1.20839	19.0274	0.351141	0.726417	0.954965	0	0
hilic	pm2.5	lur	1	0	596.755	64.988	0.0911013	-0.0697935	0.251996	23.19	1.11489	0.265914	0.906175	0.163702	-0.0211828	0.348587	23.1431	1.74715	0.0823164	0.883312	-0.0455462	-0.387407	0.296314	23.2933	-0.265188	0.791555	0.970036	0	0
hilic	pm2.5	lur	1	0	314.181	36.535	0.389262	-0.301237	1.07976	17.6214	1.11002	0.268005	0.912158	0.745507	-0.128465	1.61948	17.9424	1.68319	0.0940726	0.883312	-0.585492	-1.69879	0.527808	16.9145	-1.04679	0.298388	0.895002	0	0
hilic	pm2.5	lur	1	0	529.884	38.258	-0.156311	-0.434151	0.12153	20.7791	-1.10776	0.268979	0.912781	-0.0466203	-0.404282	0.311042	20.3793	-0.257205	0.797314	0.986872	-0.207389	-0.605063	0.190286	21.6597	-1.03802	0.302426	0.895002	0	0
hilic	pm2.5	lur	1	0	255.047	202.074	-0.273804	-0.76127	0.213662	17.4718	-1.10598	0.269747	0.912781	-0.0474637	-0.558662	0.463734	17.6743	-0.18321	0.854839	0.989597	-0.830215	-1.97869	0.318264	17.0259	-1.43886	0.154141	0.855884	0	0
hilic	pm2.5	lur	1	0	98.919	67.445	0.0277399	-0.0216528	0.0771327	25.8162	1.10584	0.269805	0.912781	0.00599124	-0.0504984	0.0624809	25.8167	0.209279	0.834467	0.988245	0.100166	-0.0157641	0.216097	25.815	1.71979	0.0893863	0.855884	0	0
hilic	pm2.5	lur	1	0	170.033	87.466	0.324599	-0.253608	0.902806	17.8267	1.10539	0.270002	0.912781	0.608139	-0.102251	1.31853	17.8869	1.68921	0.0929102	0.883312	-0.335144	-1.3846	0.714307	17.694	-0.635652	0.52684	0.920494	0	0
hilic	pm2.5	lur	1	0	201.976	267.622	0.0843434	-0.0661096	0.234796	20.3038	1.10383	0.270677	0.912781	0.153367	0.00737033	0.299364	20.3379	2.07285	0.0396114	0.883312	-0.0833278	-0.467898	0.301243	20.2288	-0.431285	0.667436	0.941473	0	0
hilic	pm2.5	lur	1	0	517.835	67.377	-0.235667	-0.65628	0.184945	21.5364	-1.10324	0.270933	0.912781	-0.162217	-0.679856	0.355422	21.4845	-0.618368	0.537115	0.961983	-0.498518	-1.24181	0.244776	21.6505	-1.33497	0.185721	0.855884	0	0
hilic	pm2.5	lur	1	0	588.725	66.531	0.106438	-0.0839148	0.296791	23.2643	1.101	0.271902	0.912781	0.214182	-0.0049036	0.433267	23.2393	1.92907	0.0552955	0.883312	-0.103039	-0.498493	0.292415	23.3196	-0.518628	0.60547	0.92951	0	0
hilic	pm2.5	lur	1	0	104.053	65.867	-0.0976658	-0.272343	0.077011	22.3023	-1.10093	0.271935	0.912781	-0.116743	-0.343517	0.11003	22.3456	-1.01582	0.311077	0.961983	-0.100168	-0.374032	0.173695	22.2071	-0.728024	0.468751	0.914945	0	0
hilic	pm2.5	lur	1	0	298.101	114.873	0.18079	-0.142724	0.504305	20.8984	1.10035	0.272184	0.912781	0.146538	-0.265543	0.558618	20.8694	0.701689	0.483779	0.961983	0.248683	-0.290022	0.787387	20.9621	0.918851	0.36097	0.895002	0	0
hilic	pm2.5	lur	1	0	230.051	75.122	0.154025	-0.121655	0.429705	21.3671	1.10011	0.272288	0.912781	0.266834	-0.0678289	0.601496	21.3354	1.5733	0.117406	0.891976	-0.155651	-0.667877	0.356574	21.4371	-0.604842	0.547017	0.920494	0	0
hilic	pm2.5	lur	1	0	216.031	100.347	0.327236	-0.258655	0.913127	17.2422	1.09975	0.272446	0.912781	0.333085	-0.289693	0.955863	17.0611	1.05536	0.292676	0.961983	0.366369	-0.948898	1.68164	17.6409	0.554441	0.580843	0.927523	0	0
hilic	pm2.5	lur	1	0	109.076	116.483	-0.102154	-0.285305	0.0809972	22.0187	-1.09824	0.273105	0.912781	-0.132529	-0.352042	0.086984	22.0206	-1.19132	0.235096	0.961983	-0.026792	-0.383497	0.329913	22.0147	-0.149502	0.881539	0.986021	0	0
hilic	pm2.5	lur	1	0	178.009	104.34	-0.0962586	-0.269058	0.076541	21.5864	-1.09685	0.273709	0.912781	-0.189416	-0.394419	0.015586	21.5709	-1.82321	0.0699306	0.883312	0.136252	-0.200638	0.473142	21.6205	0.805016	0.423226	0.905711	0	0
hilic	pm2.5	lur	1	0	164.117	72.493	-0.0645916	-0.180621	0.0514373	23.5933	-1.09613	0.274026	0.912781	-0.05549	-0.196783	0.0858026	23.5768	-0.77495	0.439386	0.961983	-0.0613697	-0.287882	0.165142	23.6299	-0.539278	0.591211	0.927631	0	0
hilic	pm2.5	lur	1	0	120.026	26.417	0.0815044	-0.0649917	0.228001	19.9319	1.09548	0.274307	0.912781	0.0270712	-0.15722	0.211362	19.9723	0.289856	0.77226	0.986872	0.14046	-0.105386	0.386305	19.8429	1.13721	0.258889	0.884455	0	0
hilic	pm2.5	lur	1	0	1212.77	85.341	0.12692	-0.101504	0.355345	22.9952	1.09405	0.274932	0.912781	0.136191	-0.133326	0.405708	23.0285	0.997105	0.320052	0.961983	0.061843	-0.401072	0.524758	22.9217	0.265913	0.790999	0.970036	0	0
hilic	pm2.5	lur	1	0	602.702	65.347	0.112112	-0.0898121	0.314036	21.5061	1.09324	0.275289	0.912781	0.0719378	-0.17354	0.317416	21.4179	0.57826	0.563812	0.961983	0.222536	-0.159268	0.604341	21.7003	1.16014	0.249486	0.88115	0	0
hilic	pm2.5	lur	1	0	237.221	25.774	-0.225601	-0.6324	0.181199	17.5965	-1.09197	0.275845	0.912781	-0.125905	-0.603067	0.351258	17.6715	-0.520659	0.603244	0.967904	-0.533987	-1.35436	0.28639	17.4314	-1.29559	0.198889	0.855884	0	0
hilic	pm2.5	lur	1	0	195.113	40.519	-0.124613	-0.349406	0.100179	21.5468	-1.09152	0.276041	0.912781	0.0539955	-0.197219	0.30521	21.5721	0.424122	0.671983	0.970577	-0.515253	-0.998892	-0.0316131	21.4909	-2.12055	0.0370965	0.855884	0	0
hilic	pm2.5	lur	1	0	251.2	31.753	-0.0911666	-0.255739	0.0734057	19.7776	-1.09076	0.276376	0.912781	-0.0414588	-0.244222	0.161304	19.7657	-0.403466	0.687085	0.970577	-0.185709	-0.488488	0.11707	19.8038	-1.22084	0.225778	0.863414	0	0
hilic	pm2.5	lur	1	0	329.268	25.72	0.213652	-0.172031	0.599336	16.8816	1.09076	0.276379	0.912781	0.272232	-0.211653	0.756117	16.9289	1.11013	0.268423	0.961983	0.204623	-0.45041	0.859656	16.7773	0.621787	0.535872	0.920494	0	0
hilic	pm2.5	lur	1	0	170.978	294.983	-0.207805	-0.583249	0.16764	18.3132	-1.08983	0.276784	0.912781	-0.225131	-0.675207	0.224945	18.2902	-0.987024	0.324956	0.961983	-0.115468	-0.846697	0.615761	18.364	-0.314311	0.754113	0.964748	0	0
hilic	pm2.5	lur	1	0	424.143	112.801	0.255747	-0.206398	0.717891	17.4932	1.08964	0.276868	0.912781	0.361986	-0.204751	0.928722	17.3377	1.26034	0.209177	0.961983	0.1836	-0.653467	1.02067	17.8357	0.436578	0.663608	0.941473	0	0
hilic	pm2.5	lur	1	0	433.283	44.175	0.40535	-0.327495	1.13819	16.224	1.0891	0.277105	0.912781	0.868707	-0.0570525	1.79447	16.5123	1.85163	0.0657177	0.883312	-0.480119	-1.70352	0.74328	15.5892	-0.781144	0.437052	0.905711	0	0
hilic	pm2.5	lur	1	0	176.071	36.86	0.170964	-0.138287	0.480215	21.5145	1.08854	0.277353	0.912781	0.367338	-0.0019294	0.736606	21.4869	1.96292	0.0511962	0.883312	-0.226576	-0.817634	0.364483	21.5752	-0.763015	0.447727	0.905711	0	0
hilic	pm2.5	lur	1	0	520.738	66.586	0.047854	-0.0387506	0.134459	24.6505	1.088	0.277592	0.912781	0.10993	0.00714024	0.212719	24.6394	2.1103	0.0362142	0.883312	-0.0858168	-0.26219	0.0905568	24.675	-0.968476	0.335762	0.895002	0	0
hilic	pm2.5	lur	1	0	288.15	44.629	-0.379942	-1.06774	0.30786	20.0468	-1.08769	0.277728	0.912781	-0.658391	-1.55771	0.240931	19.6179	-1.4446	0.15031	0.920753	0.378971	-0.578865	1.33681	20.9913	0.787526	0.43333	0.905711	0	0
hilic	pm2.5	lur	1	0	172.851	66.182	0.138748	-0.112712	0.390209	17.3747	1.08645	0.278276	0.912781	0.0472768	-0.275455	0.370008	17.3707	0.289058	0.77287	0.986872	0.389916	-0.0157411	0.795574	17.3833	1.91321	0.0593439	0.855884	0	0
hilic	pm2.5	lur	1	0	1072.28	84.615	-0.277974	-0.782232	0.226285	19.8113	-1.08543	0.278726	0.912781	-0.361542	-0.970312	0.247229	19.9519	-1.17188	0.242794	0.961983	-0.0587119	-1.02311	0.905689	19.5017	-0.121177	0.903859	0.992091	0	0
hilic	pm2.5	lur	1	0	105.097	54.238	0.43763	-0.356914	1.23217	19.7621	1.08453	0.279125	0.912781	0.643569	-0.328717	1.61586	19.3028	1.30611	0.193183	0.952239	0.1162	-1.34675	1.57915	20.7736	0.158099	0.874782	0.984419	0	0
hilic	pm2.5	lur	1	0	414.336	41.026	-0.399635	-1.12544	0.326168	15.5023	-1.08417	0.279284	0.912781	0.148756	-0.715593	1.0131	15.4924	0.339596	0.734557	0.981794	-1.2143	-2.53569	0.107086	15.5242	-1.82914	0.0711515	0.855884	0	0
hilic	pm2.5	lur	1	0	386.76	68.644	0.0333291	-0.0272483	0.0939066	25.2584	1.08334	0.27965	0.912781	0.044895	-0.0296827	0.119473	25.2435	1.18786	0.236452	0.961983	0.00550746	-0.119169	0.130184	25.291	0.0879256	0.930158	0.992091	0	0
hilic	pm2.5	lur	1	0	278.219	37.19	-0.271813	-0.766163	0.222537	17.3007	-1.08265	0.279957	0.912781	-0.404491	-1.02133	0.212349	17.3884	-1.29394	0.197344	0.957234	0.172667	-0.685246	1.03058	17.1075	0.400604	0.689793	0.944899	0	0
hilic	pm2.5	lur	1	0	140.871	59.806	0.243056	-0.199026	0.685137	18.3654	1.08257	0.279993	0.912781	0.195725	-0.348306	0.739755	18.0765	0.709905	0.478681	0.961983	0.466013	-0.337894	1.26992	19.0018	1.15383	0.252048	0.882166	0	0
hilic	pm2.5	lur	1	0	217.129	86.64	-0.257489	-0.726047	0.21107	20.2599	-1.08205	0.280223	0.912781	-0.353578	-0.900922	0.193766	20.3133	-1.27468	0.204064	0.957234	-0.0174964	-0.960567	0.925574	20.1423	-0.0369279	0.970636	0.998705	0	0
hilic	pm2.5	lur	1	0	212.012	89.083	-0.268987	-0.759085	0.221111	16.5025	-1.08068	0.280827	0.912781	-0.0699788	-0.650802	0.510844	16.518	-0.237739	0.812354	0.987696	-0.60147	-1.51552	0.312577	16.4685	-1.30977	0.194069	0.855884	0	0
hilic	pm2.5	lur	1	0	198.011	272.877	-0.11023	-0.311092	0.0906322	23.5146	-1.08057	0.280878	0.912781	0.0797545	-0.128868	0.288378	23.5229	0.754347	0.451627	0.961983	-0.390779	-0.84428	0.0627218	23.4965	-1.71516	0.0902363	0.855884	0	0
hilic	pm2.5	lur	1	0	269.226	37.647	-0.0724812	-0.204579	0.0596169	25.6918	-1.08039	0.280959	0.912781	-0.0659348	-0.231724	0.0998543	25.7486	-0.78476	0.433626	0.961983	-0.0674342	-0.298868	0.163999	25.5668	-0.579968	0.563586	0.92166	0	0
hilic	pm2.5	lur	1	0	158.092	106.738	-0.077356	-0.218478	0.0637665	23.8435	-1.07932	0.281436	0.913187	-0.0748492	-0.24672	0.0970214	23.8935	-0.859338	0.391297	0.961983	-0.101989	-0.360113	0.156134	23.7334	-0.786463	0.433949	0.905711	0	0
hilic	pm2.5	lur	1	0	93.07	33.202	-0.0785699	-0.222042	0.064902	20.8952	-1.0783	0.281887	0.913187	-0.0859017	-0.267367	0.0955635	20.8691	-0.934085	0.351511	0.961983	-0.0322454	-0.284256	0.219765	20.9529	-0.254683	0.79963	0.973407	0	0
hilic	pm2.5	lur	1	0	91.98	69.876	-0.0627249	-0.177394	0.0519441	23.6798	-1.07707	0.282435	0.913187	-0.081389	-0.216732	0.0539537	23.7121	-1.18661	0.236944	0.961983	0.00349142	-0.231344	0.238326	23.6088	0.029593	0.976466	0.998705	0	0
hilic	pm2.5	lur	1	0	542.947	86.327	-0.197884	-0.559729	0.163962	21.0969	-1.07681	0.282554	0.913187	-0.222564	-0.625134	0.180005	21.2193	-1.09092	0.276766	0.961983	-0.0194748	-0.811896	0.772947	20.8272	-0.0489177	0.961108	0.998705	0	0
hilic	pm2.5	lur	1	0	130.041	96.347	0.223108	-0.185209	0.631425	21.0437	1.07589	0.282962	0.913187	0.307705	-0.198666	0.814076	20.9847	1.19907	0.232078	0.961983	0.140477	-0.581225	0.862178	21.1736	0.387433	0.699478	0.945635	0	0
hilic	pm2.5	lur	1	0	333.843	67.705	0.110812	-0.0920476	0.313672	20.9951	1.07558	0.283101	0.913187	0.1532	-0.0977809	0.404182	21.026	1.20447	0.229989	0.961983	0.0726948	-0.292225	0.437615	20.9271	0.396512	0.692797	0.944899	0	0
hilic	pm2.5	lur	1	0	203.139	84.635	0.170288	-0.141941	0.482517	21.873	1.07389	0.283854	0.914528	-0.142158	-0.492331	0.208016	21.5253	-0.80106	0.424153	0.961983	0.905279	0.282786	1.52777	22.6387	2.89466	0.00490515	0.855884	0	0
hilic	pm2.5	lur	1	0	1049.81	85.78	0.232153	-0.194094	0.6584	18.9139	1.07242	0.284515	0.915573	-0.0504586	-0.495254	0.394337	18.6824	-0.223848	0.82313	0.988245	0.73287	-0.258259	1.724	19.4236	1.47179	0.145048	0.855884	0	0
hilic	pm2.5	lur	1	0	331.092	96.557	-0.0858512	-0.243627	0.0719249	20.7534	-1.07141	0.284967	0.91594	-0.0890198	-0.26422	0.0861804	20.7669	-1.00261	0.317397	0.961983	-0.109015	-0.46094	0.242909	20.7237	-0.616578	0.539286	0.920494	0	0
hilic	pm2.5	lur	1	0	135.011	176.186	0.12922	-0.108459	0.366898	18.529	1.07051	0.285373	0.916161	0.15425	-0.123097	0.431597	18.4697	1.09744	0.273916	0.961983	0.0973394	-0.393185	0.587864	18.6596	0.394983	0.69392	0.944899	0	0
hilic	pm2.5	lur	1	0	212.034	104.672	-0.256534	-0.729239	0.21617	18.3345	-1.06858	0.286239	0.917505	-0.111974	-0.69672	0.472772	18.2802	-0.377858	0.705981	0.970936	-0.592017	-1.42804	0.244009	18.4541	-1.4095	0.162612	0.855884	0	0
hilic	pm2.5	lur	1	0	114.059	51.637	-0.143259	-0.407523	0.121005	23.0433	-1.06742	0.286761	0.917505	-0.192941	-0.475787	0.0899047	23.0426	-1.34603	0.179987	0.945827	0.0295701	-0.581738	0.640878	23.0449	0.0962815	0.923541	0.992091	0	0
hilic	pm2.5	lur	1	0	115.075	287.706	-0.304799	-0.867121	0.257523	18.1113	-1.06728	0.286823	0.917505	-0.288328	-0.934446	0.357789	18.052	-0.880551	0.379735	0.961983	-0.228989	-1.39874	0.940764	18.2419	-0.389647	0.697846	0.945635	0	0
hilic	pm2.5	lur	1	0	294.011	60.635	-0.269848	-0.768135	0.228439	19.9781	-1.06633	0.287253	0.917505	-0.122428	-0.749682	0.504825	19.9961	-0.385139	0.700589	0.970577	-0.388776	-1.23057	0.453018	19.9385	-0.919271	0.360752	0.895002	0	0
hilic	pm2.5	lur	1	0	486.115	97.759	-0.232739	-0.662705	0.197227	17.3509	-1.06582	0.28748	0.917505	-0.294132	-0.80788	0.219617	17.2229	-1.12972	0.260099	0.961983	-0.102983	-0.933447	0.727481	17.6328	-0.246828	0.805681	0.9738	0	0
hilic	pm2.5	lur	1	0	186.036	114.037	-0.324931	-0.925888	0.276026	17.1505	-1.06463	0.28802	0.918148	-0.151835	-0.867382	0.563712	17.094	-0.418709	0.675928	0.970577	-0.750063	-1.93938	0.439253	17.2748	-1.25531	0.213066	0.855884	0	0
hilic	pm2.5	lur	1	0	127.397	60.355	-0.253323	-0.722361	0.215716	19.5887	-1.06345	0.288554	0.918773	-0.206042	-0.663455	0.251371	19.6846	-0.888844	0.375273	0.961983	-0.297309	-1.45875	0.864127	19.3774	-0.509522	0.611806	0.92951	0	0
hilic	pm2.5	lur	1	0	204.123	59.247	-0.0697177	-0.199122	0.0596862	30.0247	-1.06083	0.289739	0.92133	-0.121854	-0.278558	0.0348505	29.9781	-1.53439	0.126689	0.891976	0.0417499	-0.206502	0.290002	30.1271	0.334744	0.738705	0.95961	0	0
hilic	pm2.5	lur	1	0	244.191	33.613	0.118715	-0.101769	0.3392	20.3467	1.06018	0.290036	0.92133	0.0824977	-0.184273	0.349268	20.3817	0.610214	0.54249	0.961983	0.109839	-0.310678	0.530356	20.2695	0.519906	0.604583	0.92951	0	0
hilic	pm2.5	lur	1	0	344.031	86.229	-0.207753	-0.594463	0.178958	16.6828	-1.05782	0.291108	0.923657	-0.199865	-0.658072	0.258342	16.6417	-0.860702	0.390547	0.961983	-0.324491	-1.08594	0.436955	16.7732	-0.848229	0.398873	0.901818	0	0
hilic	pm2.5	lur	1	0	441.329	38.588	-0.19335	-0.553838	0.167138	19.9918	-1.0561	0.291891	0.92506	-0.124968	-0.589261	0.339326	19.5154	-0.531108	0.595999	0.966408	-0.159176	-0.691763	0.373411	21.041	-0.594892	0.553616	0.920494	0	0
hilic	pm2.5	lur	1	0	474.939	83.2	0.146687	-0.127061	0.420435	20.3481	1.05509	0.29235	0.925435	0.0780928	-0.251354	0.407539	20.4231	0.46774	0.640536	0.970577	0.231031	-0.284756	0.746818	20.1829	0.891559	0.375337	0.895002	0	0
hilic	pm2.5	lur	1	0	578.738	38.142	-0.419145	-1.20236	0.364071	16.2342	-1.05374	0.292969	0.92545	-0.0587845	-1.04198	0.924415	15.9425	-0.117978	0.906217	0.990901	-1.08017	-2.4035	0.243148	16.8767	-1.62472	0.108205	0.855884	0	0
hilic	pm2.5	lur	1	0	250.868	65.04	0.127762	-0.111162	0.366685	20.5148	1.05291	0.293349	0.92545	0.235107	-0.0776158	0.54783	20.4556	1.48349	0.139694	0.915223	-0.133306	-0.487242	0.22063	20.6453	-0.749679	0.455675	0.910009	0	0
hilic	pm2.5	lur	1	0	500.379	38.818	-0.156311	-0.4488	0.136178	19.1936	-1.05228	0.293638	0.92545	-0.109115	-0.447182	0.228953	18.8184	-0.636879	0.525013	0.961983	-0.247701	-0.847293	0.351892	20.0199	-0.822282	0.413391	0.905711	0	0
hilic	pm2.5	lur	1	0	144.102	69.756	-0.250076	-0.718315	0.218164	28.341	-1.05161	0.293944	0.92545	-0.245388	-0.808521	0.317744	28.558	-0.859847	0.391017	0.961983	-0.148704	-1.03614	0.73873	27.8632	-0.333532	0.739617	0.95961	0	0
hilic	pm2.5	lur	1	0	88.039	99.872	-0.0492523	-0.141701	0.043196	24.4976	-1.04901	0.295138	0.92545	-0.0735798	-0.183203	0.036043	24.5272	-1.32445	0.187033	0.952101	-0.0055703	-0.186551	0.17541	24.4323	-0.0612626	0.951305	0.99643	0	0
hilic	pm2.5	lur	1	0	580.279	55.542	-0.365567	-1.05188	0.320747	16.5835	-1.04881	0.29523	0.92545	-0.524847	-1.35319	0.303495	16.6909	-1.25026	0.212827	0.961983	0.116301	-1.14308	1.37568	16.3469	0.183813	0.854631	0.980706	0	0
hilic	pm2.5	lur	1	0	521.886	39.249	-0.157349	-0.452785	0.138087	20.0942	-1.0487	0.295279	0.92545	-0.0902763	-0.482901	0.302348	19.6915	-0.453706	0.650587	0.970577	-0.127885	-0.500021	0.244251	20.9811	-0.684018	0.495965	0.920114	0	0
hilic	pm2.5	lur	1	0	170.055	95.669	0.0589328	-0.0518288	0.169694	21.1761	1.04766	0.295759	0.92545	-0.0259057	-0.147544	0.0957326	21.1946	-0.420246	0.674807	0.970577	0.250864	0.00167358	0.500053	21.1353	2.00381	0.0485175	0.855884	0	0
hilic	pm2.5	lur	1	0	804.844	83.79	0.0601268	-0.0532529	0.173506	25.5755	1.0442	0.297351	0.92545	0.0585241	-0.0738985	0.190947	25.5963	0.872069	0.384333	0.961983	0.071118	-0.168085	0.310322	25.5297	0.591783	0.555686	0.920494	0	0
hilic	pm2.5	lur	1	0	470.35	38.379	-0.175713	-0.507053	0.155627	20.6472	-1.04419	0.297354	0.92545	-0.113057	-0.553537	0.327423	20.2053	-0.506464	0.613151	0.967904	-0.126574	-0.550023	0.296876	21.6204	-0.594965	0.553567	0.920494	0	0
hilic	pm2.5	lur	1	0	148.06	89.479	-0.0803864	-0.232104	0.0713315	27.6335	-1.04327	0.297781	0.92545	-0.0236182	-0.190788	0.143552	27.6791	-0.278784	0.780731	0.986872	-0.219286	-0.547604	0.109033	27.5332	-1.32943	0.187532	0.855884	0	0
hilic	pm2.5	lur	1	0	227.064	94.577	0.325751	-0.290057	0.941559	18.5156	1.04158	0.298564	0.92545	0.32212	-0.464258	1.1085	18.3823	0.808284	0.419994	0.961983	0.448474	-0.53808	1.43503	18.809	0.90483	0.368306	0.895002	0	0
hilic	pm2.5	lur	1	0	530.631	65.846	0.141426	-0.12641	0.409262	19.7207	1.03971	0.299431	0.92545	0.115872	-0.233766	0.46551	19.6208	0.65394	0.513985	0.961983	0.296477	-0.106941	0.699895	19.9408	1.4628	0.147488	0.855884	0	0
hilic	pm2.5	lur	1	0	140.996	22.404	0.0429157	-0.0384342	0.124266	21.0286	1.03875	0.299876	0.92545	0.0589572	-0.0443805	0.162295	21.0508	1.12579	0.261754	0.961983	-0.0061435	-0.154085	0.141798	20.9796	-0.0826558	0.934334	0.992091	0	0
hilic	pm2.5	lur	1	0	139.988	33.648	0.075624	-0.0677708	0.219019	23.9761	1.03843	0.300024	0.92545	0.138479	-0.0466119	0.32357	24.0143	1.47631	0.141609	0.916187	-0.102431	-0.331264	0.126402	23.8917	-0.890968	0.375651	0.895002	0	0
hilic	pm2.5	lur	1	0	337.236	37.651	-0.284058	-0.822695	0.254579	17.3082	-1.03839	0.300041	0.92545	-0.330295	-1.04063	0.380045	17.4561	-0.917515	0.3601	0.961983	-0.139221	-0.918021	0.639579	16.9824	-0.35582	0.722924	0.953181	0	0
hilic	pm2.5	lur	1	0	241.031	231.655	0.146933	-0.131715	0.425581	26.5572	1.03828	0.300093	0.92545	0.0271187	-0.27745	0.331687	26.3822	0.175696	0.86073	0.989597	0.405181	-0.20192	1.01228	26.9425	1.32843	0.18786	0.855884	0	0
hilic	pm2.5	lur	1	0	106.05	98.452	-0.0458272	-0.132927	0.0412729	28.2715	-1.03599	0.301158	0.92545	-0.054467	-0.157465	0.0485312	28.2951	-1.04347	0.298128	0.961983	-0.0548564	-0.226708	0.116996	28.2193	-0.635364	0.527027	0.920494	0	0
hilic	pm2.5	lur	1	0	104.392	55.864	-0.148099	-0.429817	0.133619	21.4395	-1.03512	0.301565	0.92545	-0.0325193	-0.262483	0.197445	21.5162	-0.279035	0.780538	0.986872	-0.476181	-1.23932	0.286956	21.2706	-1.24199	0.217913	0.857755	0	0
hilic	pm2.5	lur	1	0	422.311	31.031	0.202202	-0.182672	0.587075	17.5281	1.03447	0.301867	0.92545	0.357115	-0.0818525	0.796082	17.5519	1.60529	0.110183	0.891976	-0.222283	-1.03657	0.592005	17.4756	-0.543348	0.58842	0.927631	0	0
hilic	pm2.5	lur	1	0	217.572	124.044	0.167643	-0.151842	0.487128	17.6835	1.03321	0.302457	0.92545	0.208976	-0.188235	0.606187	17.6438	1.03813	0.3006	0.961983	0.179214	-0.382645	0.741074	17.7711	0.634885	0.527338	0.920494	0	0
hilic	pm2.5	lur	1	0	579.426	37.941	-0.183203	-0.532378	0.165972	18.7312	-1.03309	0.302509	0.92545	-0.267832	-0.741964	0.2063	18.2778	-1.11466	0.266484	0.961983	0.0960795	-0.332022	0.524181	19.7297	0.446719	0.6563	0.939554	0	0
hilic	pm2.5	lur	1	0	590.723	66.138	-0.248356	-0.721864	0.225152	18.6379	-1.03276	0.302666	0.92545	-0.445362	-0.967061	0.0763367	18.5122	-1.6845	0.0938179	0.883312	0.183103	-0.856224	1.22243	18.9148	0.350666	0.726772	0.954965	0	0
hilic	pm2.5	lur	1	0	105.954	24.315	0.0803694	-0.0729124	0.233651	20.7425	1.03241	0.30283	0.92545	0.136264	-0.0607161	0.333244	20.7715	1.36501	0.173953	0.940505	-0.0258986	-0.262425	0.210628	20.6787	-0.217945	0.828034	0.980706	0	0
hilic	pm2.5	lur	1	0	464.191	45.647	-0.413614	-1.20319	0.375964	18.8084	-1.03146	0.303274	0.92545	-0.405963	-1.39305	0.581119	18.6415	-0.811542	0.418126	0.961983	-0.371814	-1.69998	0.956354	19.1761	-0.557215	0.578956	0.926602	0	0
hilic	pm2.5	lur	1	0	150.055	30.609	-0.137373	-0.40002	0.125273	19.1495	-1.02987	0.304018	0.92545	-0.136041	-0.456638	0.184555	19.2409	-0.837317	0.403525	0.961983	-0.146945	-0.629207	0.335318	18.9481	-0.606486	0.545931	0.920494	0	0
hilic	pm2.5	lur	1	0	193.159	277.008	-0.249319	-0.726012	0.227374	19.53	-1.02983	0.304034	0.92545	-0.209967	-0.754787	0.334854	19.6374	-0.760457	0.447976	0.961983	-0.332584	-1.34615	0.680981	19.2933	-0.65313	0.515568	0.920114	0	0
hilic	pm2.5	lur	1	0	604.789	74.497	0.099261	-0.0906117	0.289134	22.8525	1.02936	0.304256	0.92545	-0.010473	-0.215722	0.194776	22.7031	-0.100686	0.919912	0.990901	0.286738	-0.136182	0.709658	23.1815	1.34951	0.181026	0.855884	0	0
hilic	pm2.5	lur	1	0	332.999	271.005	-0.0851485	-0.248041	0.0777443	19.5282	-1.02926	0.304302	0.92545	-0.16362	-0.369783	0.042543	19.5213	-1.56604	0.119095	0.891976	0.13864	-0.132837	0.410118	19.5434	1.0165	0.312495	0.895002	0	0
hilic	pm2.5	lur	1	0	642.69	64.706	0.092104	-0.0842717	0.26848	22.6307	1.02823	0.304786	0.92545	0.201195	-0.0081024	0.410493	22.6016	1.89684	0.0594502	0.883312	-0.139704	-0.484082	0.204675	22.695	-0.807462	0.421824	0.905711	0	0
hilic	pm2.5	lur	1	0	272.128	39.324	-0.486471	-1.41825	0.445306	17.923	-1.02801	0.304891	0.92545	-0.656647	-1.82897	0.515674	17.9659	-1.10526	0.270523	0.961983	0.0723278	-1.52886	1.67351	17.8285	0.0899114	0.928585	0.992091	0	0
hilic	pm2.5	lur	1	0	283.19	24.926	-0.188054	-0.548347	0.172239	18.3565	-1.02773	0.305022	0.92545	-0.211332	-0.659203	0.236539	18.277	-0.931087	0.353056	0.961983	-0.126783	-0.768042	0.514475	18.5315	-0.393531	0.694987	0.944899	0	0
hilic	pm2.5	lur	1	0	521.828	67.338	-0.271579	-0.791953	0.248795	18.9526	-1.02762	0.305074	0.92545	-0.12182	-0.742704	0.499063	19.2229	-0.387157	0.699097	0.970577	-0.642731	-1.63778	0.352313	18.3572	-1.28569	0.202306	0.855884	0	0
hilic	pm2.5	lur	1	0	344.865	69.955	0.0448528	-0.0412332	0.130939	25.6632	1.02591	0.305878	0.92545	0.0963228	-0.0087863	0.201432	25.6689	1.80828	0.0722314	0.883312	-0.0791713	-0.243049	0.0847064	25.6507	-0.961608	0.33918	0.895002	0	0
hilic	pm2.5	lur	1	0	384.295	35.354	-0.0893051	-0.260867	0.0822567	21.7866	-1.02496	0.306324	0.92545	-0.0158308	-0.196892	0.165231	21.919	-0.172525	0.863218	0.989597	-0.301653	-0.694546	0.0912391	21.495	-1.52822	0.130453	0.855884	0	0
hilic	pm2.5	lur	1	0	107.053	97.854	-0.0489923	-0.143129	0.0451445	23.2537	-1.02475	0.306421	0.92545	-0.0504143	-0.161574	0.0607457	23.2777	-0.894918	0.372026	0.961983	-0.0807613	-0.265325	0.103803	23.2007	-0.870976	0.386406	0.895002	0	0
hilic	pm2.5	lur	1	0	146.165	104.669	-0.146742	-0.428809	0.135326	19.0764	-1.02436	0.306608	0.92545	-0.151871	-0.489014	0.185273	19.0056	-0.888869	0.37526	0.961983	-0.176508	-0.723461	0.370445	19.2324	-0.642339	0.522512	0.920494	0	0
hilic	pm2.5	lur	1	0	237.963	88.408	0.221741	-0.204805	0.648287	16.4239	1.0236	0.306963	0.92545	-0.002697	-0.532114	0.52672	16.3336	-0.0100523	0.991991	0.996575	0.626063	-0.103725	1.35585	16.6228	1.70754	0.0916481	0.855884	0	0
hilic	pm2.5	lur	1	0	134.081	83.716	0.0608495	-0.0562407	0.17794	23.0657	1.02326	0.307123	0.92545	0.0724873	-0.0543839	0.199358	23.0512	1.1274	0.261075	0.961983	0.0337406	-0.238234	0.305715	23.0976	0.246931	0.805602	0.9738	0	0
hilic	pm2.5	lur	1	0	328.802	68.047	0.0458067	-0.0423528	0.133966	24.4401	1.02308	0.307209	0.92545	0.0375245	-0.0821347	0.157184	24.4445	0.618795	0.536834	0.961983	0.0462368	-0.0774046	0.169878	24.4304	0.744344	0.458876	0.911684	0	0
hilic	pm2.5	lur	1	0	343.872	69.037	0.308109	-0.284984	0.901202	18.6782	1.0229	0.307296	0.92545	0.417295	-0.270954	1.10554	18.5645	1.1964	0.233115	0.961983	-0.0778336	-1.28082	1.12515	18.9286	-0.128783	0.897857	0.992091	0	0
hilic	pm2.5	lur	1	0	150.114	114.337	-0.256	-0.749146	0.237145	19.9841	-1.02215	0.307647	0.92545	-0.26283	-0.842824	0.317164	20.0048	-0.894189	0.372415	0.961983	-0.339841	-1.33358	0.653896	19.9386	-0.680697	0.498053	0.920114	0	0
hilic	pm2.5	lur	1	0	191.977	84.561	-0.131214	-0.38413	0.121701	20.3567	-1.02155	0.307935	0.92545	-0.0940121	-0.402077	0.214053	20.3638	-0.60217	0.547819	0.961983	-0.230697	-0.670847	0.209454	20.3412	-1.04326	0.300012	0.895002	0	0
hilic	pm2.5	lur	1	0	603.534	36.335	-0.305542	-0.894553	0.28347	16.8234	-1.0214	0.308002	0.92545	-0.25708	-0.981258	0.467097	17.0092	-0.700489	0.484526	0.961983	-0.33502	-1.38339	0.713353	16.4142	-0.63607	0.526569	0.920494	0	0
hilic	pm2.5	lur	1	0	180.951	260.868	0.0922818	-0.0858778	0.270441	19.6812	1.0199	0.308713	0.92545	0.218265	0.0299185	0.406612	19.7336	2.28668	0.0233792	0.883312	-0.190236	-0.60147	0.220997	19.5656	-0.920778	0.359969	0.895002	0	0
hilic	pm2.5	lur	1	0	229.086	276.076	-0.101214	-0.296842	0.0944144	20.4675	-1.01873	0.309268	0.92545	-0.0940901	-0.343455	0.155275	20.4552	-0.744538	0.457522	0.961983	-0.147971	-0.462987	0.167045	20.4945	-0.934961	0.352657	0.895002	0	0
hilic	pm2.5	lur	1	0	168.016	171.491	-0.1494	-0.438601	0.139801	24.54	-1.01719	0.309998	0.92545	-0.25985	-0.588308	0.0686073	24.5999	-1.56107	0.120264	0.891976	0.115506	-0.4973	0.728312	24.4079	0.375173	0.708537	0.947776	0	0
hilic	pm2.5	lur	1	0	509.379	48.096	-0.0834776	-0.245154	0.0781987	23.5714	-1.01666	0.310251	0.92545	0.00150846	-0.183348	0.186365	23.7163	0.0161019	0.987171	0.996575	-0.240815	-0.566697	0.0850671	23.2522	-1.47087	0.145299	0.855884	0	0
hilic	pm2.5	lur	1	0	213.185	133.443	0.110336	-0.103803	0.324475	20.3864	1.01454	0.311255	0.92545	0.222456	-0.0264545	0.471366	20.4259	1.76351	0.0795106	0.883312	-0.169897	-0.603196	0.263402	20.2994	-0.780456	0.437454	0.905711	0	0
hilic	pm2.5	lur	1	0	417.811	37.791	0.207643	-0.195592	0.610878	18.1562	1.01394	0.311545	0.92545	0.318102	-0.253975	0.89018	17.8163	1.09721	0.274015	0.961983	-0.0784566	-0.362716	0.205803	18.9049	-0.549369	0.584301	0.927631	0	0
hilic	pm2.5	lur	1	0	119.086	122.825	-0.0991937	-0.291842	0.0934548	20.6857	-1.01384	0.311591	0.92545	-0.114527	-0.337356	0.108303	20.7933	-1.01417	0.311862	0.961983	-0.0503151	-0.449347	0.348717	20.4485	-0.250981	0.80248	0.9738	0	0
hilic	pm2.5	lur	1	0	394.178	102.971	-0.275645	-0.811163	0.259874	16.3692	-1.01351	0.31175	0.92545	-0.461565	-1.11918	0.196051	16.3806	-1.38496	0.167778	0.928672	0.200982	-0.755426	1.15739	16.3439	0.418278	0.676879	0.944244	0	0
hilic	pm2.5	lur	1	0	332.839	68.565	0.0300147	-0.0283439	0.0883734	26.6413	1.0127	0.312135	0.92545	0.0591213	-0.0121793	0.130422	26.6383	1.63617	0.103551	0.889461	-0.028049	-0.147137	0.0910387	26.6479	-0.468814	0.640493	0.937675	0	0
hilic	pm2.5	lur	1	0	732.731	79.335	-0.237781	-0.70018	0.224619	19.4267	-1.01254	0.312213	0.92545	0.0942371	-0.392242	0.580716	19.5793	0.38224	0.702734	0.970577	-0.984075	-2.05483	0.0866814	19.0907	-1.82931	0.0711254	0.855884	0	0
hilic	pm2.5	lur	1	0	465.924	84.052	-0.258054	-0.760571	0.244462	17.2061	-1.01114	0.312879	0.92545	-0.305358	-0.928871	0.318155	17.2622	-0.966366	0.335158	0.961983	-0.0846021	-0.951051	0.781847	17.0824	-0.194352	0.846399	0.980706	0	0
hilic	pm2.5	lur	1	0	154.005	202.09	0.14523	-0.137588	0.428049	24.0416	1.01112	0.312889	0.92545	0.286026	-0.0953414	0.667393	24.1143	1.47993	0.140641	0.915981	-0.233601	-0.583886	0.116684	23.8814	-1.3274	0.188198	0.855884	0	0
hilic	pm2.5	lur	1	0	487.129	112.676	-0.17529	-0.516719	0.166139	17.0042	-1.0109	0.312994	0.92545	-0.203419	-0.631045	0.224208	17.1195	-0.938652	0.349167	0.961983	-0.0625308	-0.648122	0.523061	16.7503	-0.212544	0.83223	0.980706	0	0
hilic	pm2.5	lur	1	0	243.108	232.606	0.231103	-0.219401	0.681607	17.3156	1.01009	0.313383	0.92545	0.320472	-0.2102	0.851144	17.3632	1.19163	0.234975	0.961983	0.125255	-0.77188	1.02239	17.2108	0.277899	0.781816	0.96871	0	0
hilic	pm2.5	lur	1	0	470.314	50.872	0.296771	-0.282732	0.876274	20.3254	1.00836	0.314207	0.92545	0.380048	-0.312463	1.07256	20.6592	1.0829	0.280299	0.961983	0.20111	-0.877235	1.27945	19.59	0.371215	0.711471	0.948555	0	0
hilic	pm2.5	lur	1	0	302.305	37.713	0.275977	-0.263136	0.815089	17.8375	1.00796	0.314399	0.92545	0.505682	-0.208597	1.21996	18.0277	1.39697	0.164142	0.92383	-0.0116164	-0.751029	0.727796	17.4185	-0.0312705	0.975133	0.998705	0	0
hilic	pm2.5	lur	1	0	213.16	31.998	0.0688317	-0.0656905	0.203354	20.5864	1.0075	0.31462	0.92545	0.0739001	-0.0934292	0.241229	20.6601	0.871468	0.38466	0.961983	0.0560787	-0.192115	0.304272	20.4241	0.449737	0.654132	0.939554	0	0
hilic	pm2.5	lur	1	0	672.776	78.73	-0.27722	-0.81914	0.264699	20.661	-1.00726	0.314736	0.92545	-0.0514379	-0.624367	0.521491	20.6374	-0.177158	0.859584	0.989597	-0.893557	-2.15564	0.368525	20.713	-1.40924	0.162688	0.855884	0	0
hilic	pm2.5	lur	1	0	183.149	33.153	-0.253412	-0.749781	0.242958	17.8946	-1.00525	0.315702	0.92545	0.120588	-0.472989	0.714164	18.0343	0.40087	0.688991	0.970577	-1.1545	-2.08561	-0.223391	17.587	-2.46799	0.0157477	0.855884	0	0
hilic	pm2.5	lur	1	0	98.058	59.679	0.162414	-0.155823	0.480651	22.5796	1.0049	0.315867	0.92545	0.00804922	-0.388601	0.404699	22.5526	0.0400428	0.968103	0.994389	0.508956	-0.0397139	1.05763	22.639	1.84637	0.0685828	0.855884	0	0
hilic	pm2.5	lur	1	0	354.94	63.136	-0.206688	-0.611798	0.198422	20.2043	-1.0046	0.316012	0.92545	-0.378195	-0.833093	0.0767037	19.961	-1.64051	0.102645	0.885563	0.145688	-0.708265	0.999641	20.7402	0.339579	0.735075	0.95961	0	0
hilic	pm2.5	lur	1	0	514.656	66.478	0.0404079	-0.0388293	0.119645	24.2313	1.00413	0.316241	0.92545	0.0373801	-0.0668269	0.141587	24.2262	0.707818	0.479974	0.961983	0.0647384	-0.0625466	0.192024	24.2427	1.01236	0.314456	0.895002	0	0
hilic	pm2.5	lur	1	0	281.247	292.307	-0.343151	-1.01668	0.330381	19.9511	-1.00318	0.316697	0.92545	-0.759802	-1.58824	0.0686326	19.8875	-1.80976	0.0720017	0.883312	0.589223	-0.623016	1.80146	20.091	0.96748	0.336256	0.895002	0	0
hilic	pm2.5	lur	1	0	602.447	38.877	-0.141814	-0.420652	0.137023	19.0272	-1.00143	0.31754	0.92545	-0.0918601	-0.430776	0.247056	18.6965	-0.534827	0.59343	0.964792	-0.1735	-0.683496	0.336497	19.7554	-0.677146	0.500291	0.920114	0	0
hilic	pm2.5	lur	1	0	536.577	66.798	0.286792	-0.277149	0.850733	14.2267	1.00135	0.31758	0.92545	-0.034116	-0.675945	0.607713	14.2684	-0.104886	0.916583	0.990901	0.907932	-0.239947	2.05581	14.1347	1.57437	0.119397	0.855884	0	0
hilic	pm2.5	lur	1	0	482.36	49.589	-0.0871679	-0.258752	0.0844161	25.0078	-1.0003	0.318084	0.92545	-0.0070401	-0.195945	0.181865	25.185	-0.0735384	0.941459	0.990901	-0.195637	-0.566791	0.175517	24.6176	-1.04917	0.297297	0.895002	0	0
hilic	pm2.5	lur	1	0	132.531	265.664	0.0539617	-0.0522822	0.160206	23.228	1.00007	0.318193	0.92545	0.0202155	-0.0604891	0.10092	23.2671	0.49427	0.621718	0.969915	0.123405	-0.187768	0.434578	23.1417	0.789371	0.432258	0.905711	0	0
hilic	pm2.5	lur	1	0	89.107	85.447	0.0673091	-0.065305	0.199923	21.1589	0.999391	0.318524	0.92545	0.0933446	-0.0710628	0.257752	21.1861	1.12033	0.264066	0.961983	0.00879016	-0.225152	0.242732	21.099	0.0747891	0.940572	0.992091	0	0
hilic	pm2.5	lur	1	0	238.107	39.303	-0.25886	-0.768953	0.251232	17.1027	-0.999236	0.318599	0.92545	-0.439495	-1.06031	0.181317	17.1775	-1.39692	0.164157	0.92383	0.509309	-0.389117	1.40773	16.9378	1.12836	0.262581	0.886342	0	0
hilic	pm2.5	lur	1	0	254.211	27.087	0.152829	-0.148343	0.454002	17.2493	0.999179	0.318626	0.92545	0.143896	-0.218998	0.50679	17.3016	0.782435	0.434987	0.961983	0.15815	-0.418705	0.735005	17.1343	0.5457	0.58681	0.927631	0	0
hilic	pm2.5	lur	1	0	98.975	288.483	-0.140228	-0.417022	0.136566	19.7073	-0.997535	0.319422	0.92545	-0.244256	-0.577009	0.0884975	19.7166	-1.44844	0.149234	0.920753	0.0587529	-0.475863	0.593369	19.6868	0.218745	0.827413	0.980706	0	0
hilic	pm2.5	lur	1	0	113.964	293.974	0.0896178	-0.0874058	0.266641	26.176	0.996814	0.319771	0.92545	0.0838138	-0.127884	0.295511	26.1632	0.781227	0.435695	0.961983	0.136756	-0.214805	0.488317	26.204	0.774277	0.441078	0.905711	0	0
hilic	pm2.5	lur	1	0	308.205	29.441	0.217999	-0.212675	0.648672	18.5189	0.996682	0.319835	0.92545	0.230013	-0.30931	0.769336	18.6544	0.841553	0.401155	0.961983	0.122373	-0.624975	0.869721	18.2205	0.325921	0.745346	0.961695	0	0
hilic	pm2.5	lur	1	0	140.099	74.097	0.240927	-0.235314	0.717168	21.7916	0.996117	0.320109	0.92545	0.219886	-0.404372	0.844143	21.648	0.695042	0.487926	0.961983	0.238792	-0.430806	0.90839	22.1078	0.709832	0.479898	0.920114	0	0
hilic	pm2.5	lur	1	0	314.217	43.522	-0.257142	-0.765467	0.251182	18.9264	-0.996056	0.320139	0.92545	-0.0182501	-0.426556	0.390056	19.2012	-0.0881979	0.929817	0.990901	-1.20051	-2.56631	0.165283	18.3213	-1.74957	0.0840753	0.855884	0	0
hilic	pm2.5	lur	1	0	167.143	154.054	-0.141659	-0.421729	0.138412	19.7793	-0.995926	0.320202	0.92545	-0.158683	-0.490649	0.173284	19.7658	-0.94322	0.346833	0.961983	-0.169512	-0.731431	0.392406	19.8091	-0.600452	0.549924	0.920494	0	0
hilic	pm2.5	lur	1	0	308.826	65.669	0.211061	-0.206608	0.628729	17.1378	0.995007	0.320647	0.92545	0.100076	-0.415852	0.616004	17.075	0.382754	0.702354	0.970577	0.612291	-0.127009	1.35159	17.2759	1.64849	0.103222	0.855884	0	0
hilic	pm2.5	lur	1	0	278.037	62.69	-0.138717	-0.413495	0.136062	21.1621	-0.994026	0.321124	0.92545	-0.138417	-0.484055	0.207221	21.2338	-0.790216	0.430442	0.961983	-0.108321	-0.579269	0.362627	21.0041	-0.457814	0.648343	0.937675	0	0
hilic	pm2.5	lur	1	0	102.104	113.758	0.276104	-0.271024	0.823231	19.2363	0.993653	0.321305	0.92545	0.487134	-0.160689	1.13496	19.1381	1.48378	0.139616	0.915223	-0.0236897	-1.09977	1.05239	19.4526	-0.0438192	0.965159	0.998705	0	0
hilic	pm2.5	lur	1	0	150.058	64.374	-0.0575452	-0.171687	0.0565972	27.0911	-0.992688	0.321774	0.92545	-0.034073	-0.176624	0.108478	27.1517	-0.471647	0.63775	0.970577	-0.139767	-0.345753	0.0662185	26.9577	-1.35057	0.180688	0.855884	0	0
hilic	pm2.5	lur	1	0	157.105	34.928	0.195045	-0.191839	0.581929	17.8106	0.992671	0.321783	0.92545	0.0321745	-0.417648	0.481997	17.9269	0.14114	0.887918	0.990901	0.632036	-0.159253	1.42332	17.5545	1.58985	0.115861	0.855884	0	0
hilic	pm2.5	lur	1	0	468.308	50.335	0.0716796	-0.0707733	0.214132	26.6481	0.990776	0.322706	0.92545	0.0775512	-0.103986	0.259089	26.6559	0.842948	0.400377	0.961983	0.0793265	-0.148939	0.307592	26.631	0.691718	0.491142	0.920114	0	0
hilic	pm2.5	lur	1	0	282.251	31.33	-0.0945042	-0.282336	0.0933275	20.1217	-0.99068	0.322752	0.92545	-0.0847037	-0.327191	0.157783	20.1196	-0.689274	0.491538	0.961983	-0.112714	-0.416736	0.191307	20.1264	-0.737948	0.462732	0.911684	0	0
hilic	pm2.5	lur	1	0	182.092	108.347	0.24381	-0.241049	0.728669	16.9375	0.990119	0.323026	0.92545	0.497892	-0.136195	1.13198	17.1772	1.5494	0.123042	0.891976	-0.354543	-1.05371	0.344628	16.4096	-1.00934	0.315895	0.895002	0	0
hilic	pm2.5	lur	1	0	164.029	86.645	0.0597751	-0.0591845	0.178735	26.4151	0.9894	0.323377	0.92545	0.0916073	-0.0583947	0.241609	26.4163	1.20507	0.22976	0.961983	-0.0659223	-0.274822	0.142977	26.4125	-0.628124	0.531734	0.920494	0	0
hilic	pm2.5	lur	1	0	155.002	203.956	0.237127	-0.234905	0.709159	18.2103	0.989145	0.323501	0.92545	0.259953	-0.289793	0.809699	18.2086	0.933064	0.352037	0.961983	0.144197	-0.818296	1.10669	18.2141	0.2982	0.766333	0.965399	0	0
hilic	pm2.5	lur	1	0	212.101	91.485	-0.144127	-0.431632	0.143378	20.4525	-0.987077	0.324512	0.92545	-0.243984	-0.558311	0.0703426	20.6064	-1.53165	0.127365	0.891976	0.127016	-0.511812	0.765844	20.1136	0.395754	0.693353	0.944899	0	0
hilic	pm2.5	lur	1	0	253.056	64.021	-0.183244	-0.548799	0.182311	20.3199	-0.987025	0.324538	0.92545	-0.152192	-0.586745	0.282361	20.3013	-0.691078	0.490407	0.961983	-0.14796	-0.872907	0.576988	20.3608	-0.406244	0.685662	0.944899	0	0
hilic	pm2.5	lur	1	0	197.917	281.37	-0.14768	-0.442757	0.147397	18.9204	-0.985455	0.325306	0.92545	-0.162064	-0.520485	0.196357	18.868	-0.892219	0.373467	0.961983	-0.0773465	-0.622665	0.467972	19.036	-0.282319	0.778437	0.965845	0	0
hilic	pm2.5	lur	1	0	103.508	273.885	0.0946968	-0.0945882	0.283982	21.5419	0.985077	0.325492	0.92545	0.100937	-0.132885	0.334759	21.5224	0.851812	0.395451	0.961983	0.0726472	-0.277321	0.422615	21.5849	0.413181	0.680593	0.944899	0	0
hilic	pm2.5	lur	1	0	323.814	67.95	-0.193021	-0.578981	0.192939	20.1798	-0.984722	0.325665	0.92545	-0.192867	-0.678998	0.293263	20.2998	-0.782859	0.434739	0.961983	-0.0577545	-0.707877	0.592368	19.9155	-0.176824	0.860099	0.98273	0	0
hilic	pm2.5	lur	1	0	208.021	157.537	-0.144849	-0.434505	0.144807	17.7904	-0.984656	0.325698	0.92545	-0.19612	-0.563503	0.171263	17.824	-1.05337	0.293583	0.961983	-0.0672504	-0.559494	0.424993	17.7164	-0.271935	0.786381	0.970036	0	0
hilic	pm2.5	lur	1	0	347.064	96.806	-0.284387	-0.853848	0.285075	20.2891	-0.983322	0.326353	0.92545	-0.310357	-0.959452	0.338738	20.4572	-0.943477	0.346702	0.961983	0.108503	-1.0548	1.27181	19.9187	0.185652	0.853194	0.980706	0	0
hilic	pm2.5	lur	1	0	313.814	137.864	0.159838	-0.160447	0.480122	17.4571	0.982638	0.326689	0.92545	0.195655	-0.205018	0.596327	17.4869	0.96356	0.336559	0.961983	0.149367	-0.417713	0.716447	17.3917	0.524277	0.601553	0.92951	0	0
hilic	pm2.5	lur	1	0	187.133	278.385	-0.160736	-0.482868	0.161395	20.1544	-0.982498	0.326757	0.92545	-0.122318	-0.478953	0.234317	20.2189	-0.676777	0.499417	0.961983	-0.251234	-0.969221	0.466752	20.0124	-0.696487	0.488168	0.920114	0	0
hilic	pm2.5	lur	1	0	236.892	67.134	0.289003	-0.290321	0.868327	18.5508	0.982272	0.326869	0.92545	0.259987	-0.482993	1.00297	18.5618	0.690483	0.49078	0.961983	0.419118	-0.520084	1.35832	18.5266	0.888235	0.377111	0.895002	0	0
hilic	pm2.5	lur	1	0	433.331	36.395	-0.141183	-0.424277	0.141912	20.7152	-0.981976	0.327014	0.92545	-0.0964498	-0.457011	0.264111	20.5966	-0.527838	0.598262	0.966918	-0.162245	-0.635725	0.311235	20.9766	-0.682054	0.497199	0.920114	0	0
hilic	pm2.5	lur	1	0	342.308	35.229	0.208352	-0.209512	0.626216	20.8908	0.98178	0.32711	0.92545	0.274177	-0.199085	0.747439	21.0902	1.14316	0.25449	0.961983	0.272234	-0.60393	1.1484	20.4515	0.618454	0.538055	0.920494	0	0
hilic	pm2.5	lur	1	0	391.324	38.483	-0.108094	-0.32542	0.109232	21.0961	-0.979358	0.328303	0.927858	0.0554899	-0.196126	0.307105	21.0888	0.435166	0.663963	0.970577	-0.427069	-0.863492	0.00935418	21.1124	-1.94778	0.0549927	0.855884	0	0
hilic	pm2.5	lur	1	0	142.054	150.19	0.111975	-0.113958	0.337908	18.5293	0.97587	0.330025	0.931756	0.0985668	-0.17285	0.369984	18.5314	0.716591	0.474555	0.961983	0.200983	-0.237519	0.639485	18.5248	0.912302	0.364385	0.895002	0	0
hilic	pm2.5	lur	1	0	304.049	94.829	-0.231459	-0.698889	0.235971	15.8146	-0.97501	0.330451	0.931989	-0.0747579	-0.572927	0.423411	15.6549	-0.296114	0.767484	0.986872	-0.444702	-1.49487	0.605463	16.1662	-0.842873	0.401844	0.901942	0	0
hilic	pm2.5	lur	1	0	546.613	68.466	0.0462528	-0.0474478	0.139953	25.1277	0.971956	0.331965	0.933666	-0.0086771	-0.11935	0.101996	25.118	-0.154708	0.877225	0.989839	0.155137	-0.0383246	0.348599	25.149	1.59614	0.11445	0.855884	0	0
hilic	pm2.5	lur	1	0	242.925	62.205	0.0446875	-0.0459363	0.135311	25.4187	0.970945	0.332468	0.933666	-0.0066213	-0.114988	0.101745	25.3915	-0.120567	0.904168	0.990901	0.128368	-0.0531634	0.309899	25.4787	1.40752	0.163195	0.855884	0	0
hilic	pm2.5	lur	1	0	126.041	147.92	0.106394	-0.109431	0.32222	19.9098	0.970661	0.332609	0.933666	0.0984622	-0.164549	0.361473	19.8979	0.73871	0.461046	0.961983	0.181321	-0.226341	0.588983	19.936	0.885317	0.378672	0.895002	0	0
hilic	pm2.5	lur	1	0	131.09	100.828	0.0751125	-0.0774314	0.227656	23.9081	0.969546	0.333164	0.933666	0.138781	-0.0404464	0.318009	23.9335	1.52793	0.128285	0.891976	-0.0293702	-0.331962	0.273222	23.8521	-0.193196	0.847301	0.980706	0	0
hilic	pm2.5	lur	1	0	371.212	108.496	-0.104962	-0.318389	0.108466	23.2149	-0.968347	0.33376	0.933666	-0.148566	-0.419112	0.121979	23.3102	-1.08357	0.280004	0.961983	-0.0123556	-0.358723	0.334011	23.0049	-0.0710029	0.943575	0.992536	0	0
hilic	pm2.5	lur	1	0	432.06	103.616	-0.190266	-0.577475	0.196943	16.0165	-0.967533	0.334166	0.933666	-0.166843	-0.61923	0.285544	16.1178	-0.727741	0.467718	0.961983	-0.0863435	-0.862967	0.69028	15.7936	-0.221294	0.825435	0.980706	0	0
hilic	pm2.5	lur	1	0	254.999	86.727	0.234663	-0.243819	0.713145	18.4062	0.965672	0.335095	0.933666	0.142783	-0.373902	0.659468	18.3253	0.545291	0.586229	0.963422	0.304697	-0.780053	1.38945	18.5845	0.559099	0.577676	0.925509	0	0
hilic	pm2.5	lur	1	0	349.11	88.683	0.33688	-0.351439	1.0252	18.4933	0.963687	0.336088	0.933666	0.282698	-0.479857	1.04525	18.5623	0.731526	0.465409	0.961983	0.872129	-0.610959	2.35522	18.3415	1.17048	0.245326	0.877873	0	0
hilic	pm2.5	lur	1	0	174.076	116.767	0.120093	-0.125706	0.365892	21.1938	0.962031	0.336918	0.933666	0.118899	-0.159083	0.396881	21.2323	0.843991	0.399795	0.961983	0.202769	-0.312092	0.717631	21.1089	0.783902	0.435441	0.905711	0	0
hilic	pm2.5	lur	1	0	206.081	42.927	0.163743	-0.171611	0.499096	20.7961	0.961412	0.337228	0.933666	0.211956	-0.156049	0.579961	20.7806	1.1365	0.257257	0.961983	0.0842291	-0.646029	0.814487	20.8303	0.229581	0.819011	0.980706	0	0
hilic	pm2.5	lur	1	0	105.124	53.8	0.276499	-0.290056	0.843054	21.9623	0.960954	0.337458	0.933666	0.297228	-0.379177	0.973634	21.6074	0.867084	0.387051	0.961983	0.282774	-0.791955	1.3575	22.7438	0.52371	0.601946	0.92951	0	0
hilic	pm2.5	lur	1	0	373.912	72.915	0.288352	-0.302564	0.879269	19.0976	0.960834	0.337518	0.933666	0.266452	-0.459875	0.992779	18.9587	0.723877	0.470081	0.961983	0.32472	-0.731077	1.38052	19.4035	0.61218	0.542176	0.920494	0	0
hilic	pm2.5	lur	1	0	311.816	140.003	0.127807	-0.134145	0.38976	17.8534	0.960695	0.337588	0.933666	0.146031	-0.187968	0.48003	17.8691	0.862737	0.38943	0.961983	0.138042	-0.296198	0.572282	17.8189	0.632749	0.528725	0.920494	0	0
hilic	pm2.5	lur	1	0	231.875	252.665	0.167604	-0.1761	0.511308	20.2376	0.960177	0.337848	0.933666	0.0931886	-0.333133	0.51951	20.172	0.431323	0.666749	0.970577	0.429976	-0.178125	1.03808	20.3819	1.4074	0.16323	0.855884	0	0
hilic	pm2.5	lur	1	0	382.948	74.924	0.119073	-0.125168	0.363315	22.086	0.959944	0.337965	0.933666	0.202989	-0.102119	0.508096	22.0359	1.3128	0.190923	0.952101	-0.0815801	-0.510602	0.347441	22.1963	-0.378491	0.706081	0.947714	0	0
hilic	pm2.5	lur	1	0	141.091	287.254	-0.246864	-0.753771	0.260042	17.7809	-0.958919	0.33848	0.933666	-0.158192	-0.74538	0.428997	17.846	-0.5316	0.595659	0.966408	-0.782405	-1.80233	0.23752	17.6374	-1.52691	0.130777	0.855884	0	0
hilic	pm2.5	lur	1	0	398.74	66.349	0.0248242	-0.0261617	0.0758102	24.7645	0.958685	0.338598	0.933666	0.0232116	-0.0427503	0.0891736	24.7471	0.69437	0.488346	0.961983	0.0515763	-0.0434705	0.146623	24.803	1.0801	0.283385	0.895002	0	0
hilic	pm2.5	lur	1	0	536.892	41.638	-0.176466	-0.539014	0.186082	20.7542	-0.9584	0.338741	0.933666	-0.113296	-0.600632	0.374039	20.3254	-0.458739	0.646975	0.970577	-0.206504	-0.673746	0.260737	21.6985	-0.879707	0.381686	0.895002	0	0
hilic	pm2.5	lur	1	0	100.917	66.119	0.0284755	-0.030063	0.087014	21.6945	0.957814	0.339036	0.933666	0.0153639	-0.0527254	0.0834532	21.6944	0.445247	0.656676	0.970577	0.0773229	-0.0538183	0.208464	21.6946	1.1736	0.244082	0.877873	0	0
hilic	pm2.5	lur	1	0	518.322	56.743	-0.0548826	-0.167808	0.0580431	28.6968	-0.956959	0.339467	0.933666	0.0141149	-0.119514	0.147744	28.7822	0.208428	0.835131	0.988245	-0.197167	-0.417847	0.0235132	28.5088	-1.77837	0.0791907	0.855884	0	0
hilic	pm2.5	lur	1	0	260.815	68.885	0.0307311	-0.0325216	0.0939839	24.7164	0.956644	0.339626	0.933666	0.017108	-0.0616247	0.0958407	24.7211	0.428768	0.668605	0.970577	0.0536238	-0.0732728	0.180521	24.706	0.84112	0.402819	0.901943	0	0
hilic	pm2.5	lur	1	0	204.147	88.657	-0.225242	-0.688855	0.238371	19.0898	-0.956631	0.339632	0.933666	-0.37308	-0.897964	0.151804	19.222	-1.40254	0.162475	0.92383	0.323334	-0.576306	1.22297	18.7986	0.715374	0.476486	0.919047	0	0
hilic	pm2.5	lur	1	0	277.967	67.356	-0.0550589	-0.168572	0.0584545	23.0116	-0.955062	0.340423	0.933666	-0.0193392	-0.162048	0.12337	23.0524	-0.267402	0.789466	0.986872	-0.128417	-0.332179	0.0753446	22.9218	-1.25444	0.21338	0.855884	0	0
hilic	pm2.5	lur	1	0	313.154	42.894	0.149041	-0.158716	0.456798	27.8965	0.953561	0.341181	0.933666	0.225234	-0.147441	0.597909	27.7782	1.19256	0.23461	0.961983	-0.0581972	-0.629268	0.512874	28.1571	-0.202844	0.839778	0.980706	0	0
hilic	pm2.5	lur	1	0	345.282	39.698	0.159476	-0.170429	0.489381	22.4443	0.951825	0.34206	0.933666	0.0286104	-0.357272	0.414493	22.5027	0.146301	0.883847	0.990901	0.445471	-0.20395	1.09489	22.3156	1.36535	0.176018	0.855884	0	0
hilic	pm2.5	lur	1	0	494.843	73.994	-0.0989	-0.303797	0.105998	24.1232	-0.950409	0.342777	0.933666	-0.0744435	-0.330952	0.182065	24.1296	-0.572668	0.567584	0.961983	-0.11657	-0.475217	0.242078	24.1091	-0.646946	0.519542	0.920494	0	0
hilic	pm2.5	lur	1	0	430.299	42.125	-0.225595	-0.693371	0.242181	20.4161	-0.949603	0.343186	0.933666	-0.302808	-0.94595	0.340335	20.3583	-0.929047	0.354109	0.961983	0.0324297	-0.492144	0.557004	20.5435	0.123051	0.902379	0.992091	0	0
hilic	pm2.5	lur	1	0	675.472	37.918	-0.19132	-0.588147	0.205507	19.5717	-0.949316	0.343331	0.933666	-0.124475	-0.652688	0.403738	19.1453	-0.464998	0.642495	0.970577	-0.0487287	-0.503392	0.405934	20.5109	-0.213327	0.831622	0.980706	0	0
hilic	pm2.5	lur	1	0	506.786	69.933	-0.26759	-0.822919	0.287738	17.457	-0.948793	0.343597	0.933666	-0.322528	-0.989446	0.34439	17.5958	-0.954274	0.341225	0.961983	-0.175162	-1.22068	0.870358	17.1515	-0.33347	0.739663	0.95961	0	0
hilic	pm2.5	lur	1	0	171.096	118.195	-0.195885	-0.602422	0.210652	25.5566	-0.948751	0.343618	0.933666	-0.176904	-0.684544	0.330736	25.5956	-0.687639	0.492565	0.961983	-0.331616	-1.03387	0.37064	25.4707	-0.939918	0.350124	0.895002	0	0
hilic	pm2.5	lur	1	0	374.102	101.76	0.117293	-0.126239	0.360825	20.3426	0.948348	0.343823	0.933666	0.167881	-0.155051	0.490814	20.3435	1.02581	0.306356	0.961983	0.0828468	-0.263741	0.429435	20.3405	0.475787	0.635539	0.935568	0	0
hilic	pm2.5	lur	1	0	400.737	66.163	0.025609	-0.0275629	0.0787809	24.1234	0.948333	0.34383	0.933666	0.0105422	-0.0602849	0.0813693	24.1094	0.293705	0.769322	0.986872	0.0835245	-0.004543	0.171592	24.1542	1.88777	0.0627287	0.855884	0	0
hilic	pm2.5	lur	1	0	506.379	37.858	0.270775	-0.29161	0.83316	18.7251	0.948039	0.34398	0.933666	0.501624	-0.305559	1.30881	18.2769	1.22626	0.221701	0.961983	-0.0732579	-0.337965	0.19145	19.712	-0.550857	0.583286	0.927631	0	0
hilic	pm2.5	lur	1	0	356.227	42.187	0.252674	-0.272239	0.777586	16.3283	0.947816	0.344093	0.933666	0.317386	-0.349016	0.983789	16.5642	0.939787	0.348586	0.961983	0.123394	-0.743562	0.99035	15.8087	0.2833	0.777688	0.965845	0	0
hilic	pm2.5	lur	1	0	219.072	87.186	-0.176535	-0.543396	0.190326	20.8321	-0.947502	0.344253	0.933666	-0.230207	-0.687713	0.227298	20.8242	-0.99289	0.322096	0.961983	-0.0140188	-0.630803	0.602766	20.8495	-0.0452405	0.96403	0.998705	0	0
hilic	pm2.5	lur	1	0	220.086	110.237	-0.16796	-0.517775	0.181854	19.6632	-0.945409	0.345318	0.933666	-0.138736	-0.527657	0.250186	19.7609	-0.703889	0.482412	0.961983	-0.100953	-0.866548	0.664642	19.4481	-0.262464	0.793647	0.970036	0	0
hilic	pm2.5	lur	1	0	1098.28	68.959	-0.305407	-0.941581	0.330767	19.8716	-0.945266	0.345391	0.933666	-0.162535	-0.885919	0.560848	20.0548	-0.443361	0.658037	0.970577	-0.81163	-2.15701	0.533753	19.4682	-1.20078	0.233425	0.868469	0	0
hilic	pm2.5	lur	1	0	651.12	39.199	0.262624	-0.284498	0.809746	16.494	0.945152	0.345449	0.933666	0.593152	-0.178421	1.36473	16.0764	1.51694	0.131037	0.904786	-0.339406	-0.771856	0.0930437	17.4137	-1.56219	0.12224	0.855884	0	0
hilic	pm2.5	lur	1	0	150.014	95.842	-0.0701713	-0.216377	0.0760342	22.7767	-0.945033	0.34551	0.933666	-0.0602938	-0.217619	0.0970315	22.7779	-0.756227	0.450502	0.961983	-0.0914896	-0.428455	0.245476	22.774	-0.540426	0.590423	0.927631	0	0
hilic	pm2.5	lur	1	0	171.985	271.028	-0.130481	-0.40283	0.141869	20.1744	-0.943346	0.34637	0.933666	-0.134927	-0.457585	0.187732	20.1824	-0.82515	0.410379	0.961983	-0.172633	-0.715787	0.37052	20.1567	-0.632635	0.528799	0.920494	0	0
hilic	pm2.5	lur	1	0	354.894	78.037	0.035377	-0.0385025	0.109257	25.1278	0.942862	0.346617	0.933666	0.0469201	-0.0455737	0.139414	25.1296	1.00098	0.318181	0.961983	-0.0067655	-0.14874	0.135209	25.1238	-0.0948508	0.924673	0.992091	0	0
hilic	pm2.5	lur	1	0	152.107	28.351	0.104173	-0.113728	0.322075	19.5874	0.941343	0.347393	0.933666	0.216008	-0.0457009	0.477718	19.5977	1.62866	0.105135	0.891976	-0.228567	-0.645926	0.188793	19.5647	-1.09007	0.278997	0.895002	0	0
hilic	pm2.5	lur	1	0	284.266	283.583	0.114423	-0.124988	0.353833	21.0992	0.941066	0.347535	0.933666	0.286385	0.0193036	0.553466	21.1591	2.11585	0.0357329	0.883312	-0.21988	-0.725645	0.285885	20.9672	-0.865341	0.389471	0.895002	0	0
hilic	pm2.5	lur	1	0	170.981	290.162	0.140665	-0.153707	0.435036	19.768	0.940892	0.347624	0.933666	-0.0471625	-0.407351	0.313026	19.775	-0.258372	0.796415	0.986872	0.575873	0.0453689	1.10638	19.7527	2.16067	0.0337505	0.855884	0	0
hilic	pm2.5	lur	1	0	1038.33	68.661	0.194334	-0.212635	0.601302	21.6331	0.94024	0.347957	0.933666	0.23227	-0.198544	0.663085	21.78	1.06385	0.288821	0.961983	0.142927	-0.799061	1.08492	21.3095	0.302008	0.763439	0.964868	0	0
hilic	pm2.5	lur	1	0	101.06	288.378	-0.300679	-0.930892	0.329535	18.0655	-0.939433	0.348371	0.933666	-0.0534592	-0.784799	0.677881	17.7475	-0.144239	0.885473	0.990901	-1.12844	-2.38312	0.126245	18.766	-1.79017	0.0772576	0.855884	0	0
hilic	pm2.5	lur	1	0	149.096	153.141	0.149372	-0.163812	0.462555	19.8414	0.939119	0.348531	0.933666	0.119885	-0.249429	0.489198	19.8921	0.640541	0.522635	0.961983	0.327362	-0.302575	0.957299	19.7297	1.03438	0.304112	0.895002	0	0
hilic	pm2.5	lur	1	0	145.106	76.802	-0.227376	-0.704269	0.249517	24.5393	-0.938805	0.348692	0.933666	-0.234926	-0.808611	0.33876	24.76	-0.808044	0.420132	0.961983	-0.0940244	-1.00063	0.812585	24.0532	-0.206429	0.836987	0.980706	0	0
hilic	pm2.5	lur	1	0	95.068	54.297	-0.393174	-1.21792	0.431576	20.2245	-0.93867	0.348761	0.933666	-0.123843	-1.1357	0.888017	19.9729	-0.241507	0.809437	0.987615	-1.06532	-2.5851	0.454471	20.7788	-1.39523	0.166856	0.855884	0	0
hilic	pm2.5	lur	1	0	557.413	37.703	-0.177386	-0.550138	0.195365	18.3487	-0.937026	0.349605	0.933666	-0.221861	-0.74723	0.303507	17.9159	-0.833289	0.405786	0.961983	-0.0899766	-0.41769	0.237737	19.302	-0.546495	0.586266	0.927631	0	0
hilic	pm2.5	lur	1	0	572.418	37.939	-0.172176	-0.534053	0.189701	19.2239	-0.936835	0.349703	0.933666	-0.189186	-0.691941	0.313568	18.8619	-0.742526	0.458737	0.961983	-0.0754428	-0.446869	0.295983	20.0211	-0.404293	0.68709	0.944899	0	0
hilic	pm2.5	lur	1	0	559.424	38.633	-0.170977	-0.531013	0.189059	17.7195	-0.935066	0.350612	0.933666	-0.231506	-0.723101	0.26009	17.3367	-0.929248	0.354005	0.961983	-0.0241948	-0.453894	0.405504	18.5626	-0.112075	0.911048	0.992091	0	0
hilic	pm2.5	lur	1	0	184.073	256.496	-0.272902	-0.847962	0.302158	18.3899	-0.934424	0.350942	0.933666	-0.204956	-0.903583	0.493671	18.4433	-0.578886	0.56339	0.961983	-0.377927	-1.46253	0.706671	18.2722	-0.693569	0.489986	0.920114	0	0
hilic	pm2.5	lur	1	0	350.9	104.876	-0.245096	-0.761689	0.271496	17.5804	-0.9342	0.351058	0.933666	-0.15611	-0.788575	0.476356	17.7347	-0.487048	0.626817	0.969915	-0.585362	-1.5356	0.36488	17.2406	-1.22614	0.223787	0.863414	0	0
hilic	pm2.5	lur	1	0	99.092	29.052	0.0584043	-0.064735	0.181544	18.9624	0.933897	0.351213	0.933666	0.0172293	-0.142457	0.176916	18.999	0.2129	0.831646	0.988245	0.106075	-0.0844772	0.296627	18.8816	1.10802	0.271213	0.891499	0	0
hilic	pm2.5	lur	1	0	252.078	84.338	-0.174795	-0.543582	0.193993	22.6953	-0.93326	0.351541	0.933666	-0.256873	-0.745104	0.231358	22.5677	-1.03818	0.30058	0.961983	-0.0219616	-0.551262	0.507339	22.9765	-0.0825868	0.934389	0.992091	0	0
hilic	pm2.5	lur	1	0	303.218	38.331	-0.232274	-0.723159	0.258612	20.515	-0.931688	0.352352	0.933666	-0.49925	-1.10181	0.10331	20.4366	-1.63492	0.103814	0.889461	0.15695	-0.693377	1.00728	20.6878	0.367388	0.714312	0.951482	0	0
hilic	pm2.5	lur	1	0	584.731	66.479	0.0654844	-0.0732367	0.204206	23.4442	0.929494	0.353485	0.933666	0.160134	0.00116406	0.319104	23.4482	1.98768	0.0483634	0.883312	-0.151783	-0.445358	0.141792	23.4355	-1.02909	0.306575	0.895002	0	0
hilic	pm2.5	lur	1	0	416.345	36.697	-0.263696	-0.823148	0.295756	16.8013	-0.928094	0.35421	0.933666	-0.0095346	-0.650795	0.631726	16.9398	-0.029339	0.976627	0.996575	-0.579646	-1.73865	0.57936	16.4962	-0.995468	0.322548	0.895002	0	0
hilic	pm2.5	lur	1	0	907.826	84.531	0.0619051	-0.0694487	0.193259	24.2301	0.927971	0.354273	0.933666	0.0468023	-0.118146	0.211751	24.2366	0.559883	0.576255	0.963422	0.118721	-0.117582	0.355024	24.2157	1.00002	0.320353	0.895002	0	0
hilic	pm2.5	lur	1	0	488.782	65.344	-0.177392	-0.553829	0.199045	16.8719	-0.927883	0.354319	0.933666	-0.240586	-0.638828	0.157656	16.8083	-1.19207	0.234803	0.961983	0.160855	-0.701433	1.02314	17.0122	0.371306	0.711404	0.948555	0	0
hilic	pm2.5	lur	1	0	208.133	32.96	-0.161918	-0.505893	0.182058	19.1713	-0.926867	0.354845	0.933666	-0.177319	-0.593688	0.239049	19.0977	-0.840344	0.401831	0.961983	-0.17231	-0.83212	0.487499	19.3332	-0.519808	0.604651	0.92951	0	0
hilic	pm2.5	lur	1	0	282.279	269.816	-0.122823	-0.383955	0.13831	21.3375	-0.926122	0.355231	0.933666	-0.009399	-0.333756	0.314958	21.3191	-0.057179	0.954466	0.991368	-0.43989	-0.902921	0.0231416	21.3782	-1.89097	0.0622943	0.855884	0	0
hilic	pm2.5	lur	1	0	644.95	46.266	0.241252	-0.272564	0.755067	18.1658	0.924515	0.356065	0.933666	0.140261	-0.492093	0.772614	17.9334	0.437677	0.662145	0.970577	0.465458	-0.475862	1.40678	18.6774	0.984223	0.32801	0.895002	0	0
hilic	pm2.5	lur	1	0	194.022	65.057	-0.0582148	-0.182211	0.0657818	23.68	-0.924431	0.356109	0.933666	-0.0112933	-0.164158	0.141571	23.7579	-0.145778	0.88426	0.990901	-0.171423	-0.40232	0.0594734	23.5084	-1.47775	0.143449	0.855884	0	0
hilic	pm2.5	lur	1	0	270.843	68.08	0.203978	-0.23089	0.638845	21.0133	0.923584	0.356549	0.933666	-0.0495633	-0.59375	0.494623	20.8941	-0.179718	0.857576	0.989597	0.716417	-0.0027883	1.43562	21.276	1.98273	0.0508733	0.855884	0	0
hilic	pm2.5	lur	1	0	226.038	75.461	-0.12913	-0.404597	0.146337	22.543	-0.923014	0.356846	0.933666	-0.0852808	-0.440304	0.269742	22.5751	-0.473994	0.636079	0.970577	-0.214777	-0.655707	0.226152	22.4723	-0.969549	0.33523	0.895002	0	0
hilic	pm2.5	lur	1	0	416.285	42.474	-0.229882	-0.720284	0.260519	17.7749	-0.923006	0.35685	0.933666	-0.103057	-0.711935	0.505821	17.6316	-0.333983	0.738781	0.981794	-0.486358	-1.36862	0.395908	18.0903	-1.09725	0.275864	0.895002	0	0
hilic	pm2.5	lur	1	0	447.99	86.871	-0.262226	-0.822144	0.297693	19.4741	-0.922149	0.357296	0.933666	0.252569	-0.412906	0.918044	19.4276	0.748903	0.454893	0.961983	-1.19754	-2.2098	-0.185271	19.5765	-2.35475	0.0210178	0.855884	0	0
hilic	pm2.5	lur	1	0	594.67	65.248	0.0438903	-0.049894	0.137675	22.1305	0.921487	0.35764	0.933666	0.0590864	-0.055841	0.174014	22.095	1.01448	0.311717	0.961983	0.0429904	-0.130905	0.216886	22.2088	0.492078	0.624029	0.93368	0	0
hilic	pm2.5	lur	1	0	416.373	27.704	0.0555532	-0.0632115	0.174318	19.4937	0.921028	0.35788	0.933666	0.0997089	-0.0412943	0.240712	19.5215	1.39535	0.164629	0.92383	-0.0582859	-0.300217	0.183645	19.4325	-0.479537	0.632881	0.93368	0	0
hilic	pm2.5	lur	1	0	475.853	37.437	0.313951	-0.357425	0.985326	16.1873	0.920761	0.358019	0.933666	0.153886	-0.752669	1.06044	15.5309	0.334952	0.738051	0.981794	0.651464	-0.13507	1.438	17.6332	1.64863	0.103194	0.855884	0	0
hilic	pm2.5	lur	1	0	1063.67	49.471	-0.127813	-0.401309	0.145683	22.7081	-0.920184	0.35832	0.933666	-0.115144	-0.46694	0.236653	22.8124	-0.645843	0.519203	0.961983	-0.145409	-0.587114	0.296295	22.4782	-0.655256	0.514206	0.920114	0	0
hilic	pm2.5	lur	1	0	142.069	82.908	-0.247276	-0.776495	0.281942	18.0503	-0.920023	0.358404	0.933666	-0.602031	-1.1989	-0.0051585	18.2132	-1.99029	0.0480732	0.883312	0.669386	-0.452581	1.79135	17.6914	1.18754	0.238574	0.877673	0	0
hilic	pm2.5	lur	1	0	102.97	283.848	0.0720499	-0.0821701	0.22627	20.2363	0.919906	0.358465	0.933666	0.0933077	-0.0951356	0.281751	20.2438	0.977046	0.329858	0.961983	-0.0265274	-0.316043	0.262989	20.2196	-0.182378	0.855753	0.980706	0	0
hilic	pm2.5	lur	1	0	114.066	52.702	-0.0421503	-0.132406	0.0481052	32.2544	-0.919555	0.358648	0.933666	-0.0906241	-0.198417	0.0171687	32.2861	-1.65894	0.0988685	0.883312	0.0790518	-0.100606	0.25871	32.1846	0.875821	0.383782	0.895002	0	0
hilic	pm2.5	lur	1	0	87.1	59.283	-0.0507813	-0.159654	0.0580918	25.5354	-0.918405	0.359248	0.933666	-0.0087342	-0.138196	0.120727	25.5982	-0.133125	0.894244	0.990901	-0.145122	-0.364897	0.0746543	25.397	-1.31432	0.19254	0.855884	0	0
hilic	pm2.5	lur	1	0	990.351	66.844	-0.291176	-0.915448	0.333096	17.3658	-0.918402	0.35925	0.933666	-0.667617	-1.35229	0.0170603	17.0829	-1.92406	0.0559241	0.883312	0.61157	-0.726042	1.94918	17.9888	0.910052	0.365563	0.895002	0	0
hilic	pm2.5	lur	1	0	126.005	215.185	0.0846182	-0.0973059	0.266542	20.2956	0.915851	0.360584	0.933666	0.110926	-0.0847705	0.306622	20.3085	1.11848	0.264853	0.961983	-0.0363002	-0.45749	0.38489	20.2673	-0.171546	0.864233	0.98273	0	0
hilic	pm2.5	lur	1	0	356.263	39.314	-0.0933341	-0.29416	0.107491	22.169	-0.915108	0.360973	0.933666	-0.031359	-0.2348	0.172082	22.1718	-0.30416	0.761358	0.984574	-0.306575	-0.793071	0.17992	22.1629	-1.25432	0.213424	0.855884	0	0
hilic	pm2.5	lur	1	0	343.154	256.301	0.0537193	-0.0620281	0.169467	20.205	0.913839	0.361638	0.933666	0.045264	-0.0937701	0.184298	20.2275	0.642406	0.521427	0.961983	0.0729444	-0.157326	0.303215	20.1553	0.630529	0.530168	0.920494	0	0
hilic	pm2.5	lur	1	0	499.873	38.264	0.178038	-0.205642	0.561718	18.7542	0.91368	0.361722	0.933666	0.409681	-0.1091	0.928461	18.3572	1.55826	0.120928	0.891976	-0.043422	-0.427597	0.340753	19.6286	-0.224974	0.822581	0.980706	0	0
hilic	pm2.5	lur	1	0	439.824	37.847	-0.161502	-0.509596	0.186592	18.0606	-0.913552	0.361789	0.933666	-0.189386	-0.659697	0.280925	17.7409	-0.794586	0.427901	0.961983	0.105138	-0.254433	0.464708	18.7646	0.582003	0.562222	0.921156	0	0
hilic	pm2.5	lur	1	0	424.342	38.374	-0.0628259	-0.198338	0.0726865	25.4489	-0.912873	0.362145	0.933666	-0.0895409	-0.260926	0.0818444	25.4377	-1.03092	0.303961	0.961983	0.0127805	-0.213556	0.239117	25.4735	0.112394	0.910796	0.992091	0	0
hilic	pm2.5	lur	1	0	449.911	88.148	-0.133067	-0.420114	0.15398	20.5	-0.912786	0.362191	0.933666	-0.13953	-0.4984	0.21934	20.5146	-0.767201	0.443967	0.961983	-0.0197339	-0.508019	0.468551	20.4679	-0.0804434	0.936088	0.992091	0	0
hilic	pm2.5	lur	1	0	150.084	96.708	-0.128784	-0.406893	0.149324	19.3412	-0.911799	0.362709	0.933666	-0.195244	-0.515926	0.125438	19.3651	-1.20138	0.231181	0.961983	-0.0360347	-0.618488	0.546419	19.2886	-0.123143	0.902307	0.992091	0	0
hilic	pm2.5	lur	1	0	121.028	29.502	0.162815	-0.188836	0.514467	19.9256	0.911661	0.362782	0.933666	-0.151232	-0.530915	0.22845	19.926	-0.785963	0.432923	0.961983	0.908247	0.188511	1.62798	19.9247	2.51177	0.0140509	0.855884	0	0
hilic	pm2.5	lur	1	0	259.19	26.797	-0.179985	-0.568938	0.208967	17.5711	-0.911155	0.363048	0.933666	-0.356968	-0.859723	0.145787	17.6783	-1.40104	0.162924	0.92383	0.174323	-0.422019	0.770665	17.3351	0.581848	0.562325	0.921156	0	0
hilic	pm2.5	lur	1	0	107.573	60.522	-0.180733	-0.571313	0.209848	20.3639	-0.911124	0.363064	0.933666	-0.18816	-0.701233	0.324913	20.4578	-0.723647	0.470222	0.961983	-0.225433	-0.812379	0.361513	20.1569	-0.764486	0.446855	0.905711	0	0
hilic	pm2.5	lur	1	0	188.035	100.298	0.170421	-0.199769	0.540611	21.2685	0.906461	0.365521	0.933666	-0.0247736	-0.467068	0.417521	21.3624	-0.110524	0.912117	0.990901	0.560083	-0.15392	1.27409	21.0617	1.56136	0.122436	0.855884	0	0
hilic	pm2.5	lur	1	0	199.169	287.334	-0.226948	-0.720065	0.266169	20.4905	-0.906207	0.365656	0.933666	-0.138774	-0.748989	0.471442	20.315	-0.448747	0.654154	0.970577	-0.397019	-1.29094	0.496903	20.8771	-0.88402	0.379368	0.895002	0	0
hilic	pm2.5	lur	1	0	127.273	48.627	0.242603	-0.285368	0.770574	19.652	0.904767	0.366417	0.933666	0.349725	-0.230952	0.930402	19.7519	1.18842	0.236234	0.961983	-0.253665	-1.29805	0.790718	19.4318	-0.48345	0.630113	0.93368	0	0
hilic	pm2.5	lur	1	0	381.109	39.005	-0.158119	-0.502265	0.186026	17.1283	-0.904677	0.366464	0.933666	0.0217797	-0.37425	0.417809	17.0467	0.108518	0.913706	0.990901	-0.595299	-1.31227	0.121672	17.308	-1.65266	0.102368	0.855884	0	0
hilic	pm2.5	lur	1	0	196.865	74.031	0.0293359	-0.0345322	0.0932039	28.584	0.904412	0.366605	0.933666	0.0197876	-0.0583625	0.0979377	28.5802	0.499622	0.617952	0.968534	0.0512795	-0.0808153	0.183374	28.5923	0.772696	0.442008	0.905711	0	0
hilic	pm2.5	lur	1	0	256.055	66.615	0.284712	-0.335856	0.905279	14.8881	0.903374	0.367154	0.933666	0.374913	-0.337859	1.08769	15.6105	1.03791	0.300706	0.961983	0.014315	-1.28498	1.31361	13.297	0.0219298	0.982559	0.999158	0	0
hilic	pm2.5	lur	1	0	346.145	110.896	-0.180442	-0.573755	0.212871	20.8866	-0.903337	0.367174	0.933666	-0.105691	-0.57907	0.367687	21.0063	-0.440563	0.660058	0.970577	-0.220641	-0.962343	0.521061	20.6231	-0.592117	0.555463	0.920494	0	0
hilic	pm2.5	lur	1	0	175.99	167.798	-0.155632	-0.495019	0.183755	19.8015	-0.90293	0.367389	0.933666	-0.449359	-0.867567	-0.0311517	19.7953	-2.12022	0.035358	0.883312	0.58258	-0.0093075	1.17447	19.8151	1.95915	0.0536232	0.855884	0	0
hilic	pm2.5	lur	1	0	298.186	35.226	0.176831	-0.209166	0.562827	19.9125	0.90204	0.367861	0.933666	-0.0524726	-0.512071	0.407126	19.7969	-0.225285	0.822013	0.988245	0.576885	-0.167003	1.32077	20.1671	1.54359	0.126684	0.855884	0	0
hilic	pm2.5	lur	1	0	239.164	36.58	-0.0791319	-0.252104	0.0938406	22.1455	-0.900794	0.368522	0.933666	-0.10846	-0.327867	0.110948	22.2271	-0.975428	0.330657	0.961983	-0.0578309	-0.344761	0.229099	21.9657	-0.401175	0.689374	0.944899	0	0
hilic	pm2.5	lur	1	0	296.23	35.643	-0.167349	-0.533594	0.198896	18.5543	-0.899709	0.369098	0.933666	-0.337374	-0.816055	0.141307	18.7708	-1.39073	0.166024	0.92402	0.278263	-0.235281	0.791808	18.0775	1.07852	0.284084	0.895002	0	0
hilic	pm2.5	lur	1	0	258.981	133.75	-0.227193	-0.724722	0.270335	16.7225	-0.899143	0.369399	0.933666	-0.191107	-0.784908	0.402695	16.6052	-0.635057	0.526198	0.961983	-0.45126	-1.40115	0.498634	16.9809	-0.945588	0.347242	0.895002	0	0
hilic	pm2.5	lur	1	0	1106.27	84.673	0.155484	-0.185151	0.49612	19.9589	0.898767	0.369599	0.933666	0.126532	-0.28045	0.533513	19.969	0.613482	0.540332	0.961983	0.219944	-0.450422	0.890309	19.9368	0.653056	0.515616	0.920114	0	0
hilic	pm2.5	lur	1	0	130.123	27.204	0.112126	-0.133904	0.358155	19.0023	0.897364	0.370345	0.933666	0.0887792	-0.218214	0.395773	18.98	0.570638	0.568957	0.961983	0.124641	-0.297721	0.547003	19.0515	0.587388	0.558618	0.921156	0	0
hilic	pm2.5	lur	1	0	136.076	70.508	-0.0498522	-0.159315	0.0596109	25.5878	-0.896742	0.370676	0.933666	-0.0136583	-0.144208	0.116892	25.6296	-0.206442	0.836679	0.988245	-0.138571	-0.358535	0.0813934	25.4959	-1.25392	0.213568	0.855884	0	0
hilic	pm2.5	lur	1	0	115.069	55.791	-0.0412701	-0.131928	0.049388	27.7361	-0.896355	0.370883	0.933666	-0.0917613	-0.200359	0.0168364	27.7681	-1.66731	0.0971914	0.883312	0.0846228	-0.0940785	0.263324	27.6656	0.942562	0.348778	0.895002	0	0
hilic	pm2.5	lur	1	0	487.213	260.144	0.164423	-0.196845	0.525691	16.7564	0.896157	0.370989	0.933666	0.0804314	-0.330752	0.491615	16.7372	0.385983	0.699965	0.970577	0.407989	-0.35336	1.16934	16.7988	1.06663	0.289386	0.895002	0	0
hilic	pm2.5	lur	1	0	253.164	37.621	-0.23351	-0.746635	0.279615	18.5244	-0.896052	0.371045	0.933666	0.0929241	-0.47095	0.656798	18.669	0.32518	0.745422	0.982258	-1.10921	-2.24053	0.0221128	18.2061	-1.95154	0.0545366	0.855884	0	0
hilic	pm2.5	lur	1	0	379.007	91.139	-0.209176	-0.669107	0.250756	17.185	-0.895507	0.371335	0.933666	-0.178491	-0.744293	0.387311	16.9045	-0.622486	0.53441	0.961983	-0.307838	-1.14285	0.527176	17.8029	-0.733802	0.465241	0.912343	0	0
hilic	pm2.5	lur	1	0	1042.8	84.512	0.0621445	-0.0745608	0.19885	25.9345	0.895093	0.371556	0.933666	0.018141	-0.157954	0.194236	25.9463	0.203278	0.839147	0.988245	0.174563	-0.0517938	0.400919	25.9085	1.535	0.128778	0.855884	0	0
hilic	pm2.5	lur	1	0	270.191	34.611	-0.210298	-0.672931	0.252336	18.0646	-0.895052	0.371577	0.933666	0.141268	-0.368589	0.651124	18.3391	0.546729	0.585242	0.963422	-1.00129	-2.0085	0.00591625	17.4601	-1.97875	0.0513282	0.855884	0	0
hilic	pm2.5	lur	1	0	663.296	34.078	-0.253987	-0.813523	0.305548	15.5397	-0.89379	0.372251	0.933666	-0.271105	-1.06281	0.520595	15.0449	-0.675702	0.500097	0.961983	-0.038325	-0.471893	0.395243	16.6292	-0.175944	0.860788	0.98273	0	0
hilic	pm2.5	lur	1	0	1178.77	84.644	0.0754001	-0.0907105	0.241511	24.8364	0.89377	0.372262	0.933666	0.0538231	-0.156184	0.26383	24.8504	0.505725	0.613669	0.967904	0.15796	-0.131018	0.446938	24.8057	1.08801	0.279899	0.895002	0	0
hilic	pm2.5	lur	1	0	400.253	32.39	0.178059	-0.214298	0.570416	18.379	0.893581	0.372363	0.933666	0.307011	-0.162996	0.777018	18.488	1.28893	0.199078	0.957234	-0.33257	-1.07271	0.407565	18.139	-0.894381	0.373835	0.895002	0	0
hilic	pm2.5	lur	1	0	682.586	67.347	0.0294275	-0.0354233	0.0942783	24.6641	0.893488	0.372413	0.933666	0.0252489	-0.0585457	0.109044	24.6645	0.594573	0.552876	0.961983	0.0341664	-0.0841522	0.152485	24.6631	0.574773	0.567078	0.923925	0	0
hilic	pm2.5	lur	1	0	246.085	124.48	-0.13428	-0.430638	0.162078	18.8133	-0.892166	0.373119	0.933666	-0.0941197	-0.458544	0.270304	18.7219	-0.509626	0.610938	0.967904	-0.162349	-0.697021	0.372323	19.0146	-0.604383	0.547321	0.920494	0	0
hilic	pm2.5	lur	1	0	447.383	36.456	-0.229759	-0.737196	0.277679	17.3452	-0.89154	0.373454	0.933666	-0.261958	-0.881446	0.35753	17.6127	-0.834406	0.405159	0.961983	-0.0471969	-0.987372	0.892978	16.756	-0.0999206	0.92066	0.992091	0	0
hilic	pm2.5	lur	1	0	140.962	21.287	0.044767	-0.0543795	0.143913	20.2339	0.889061	0.374782	0.933666	0.0671561	-0.0480494	0.182362	20.2746	1.15024	0.251569	0.961983	0.0179403	-0.195097	0.230978	20.1442	0.167619	0.867311	0.983146	0	0
hilic	pm2.5	lur	1	0	240.839	64.239	0.0770531	-0.0936023	0.247708	21.0136	0.889039	0.374794	0.933666	0.0396465	-0.180528	0.259821	20.9661	0.355317	0.722768	0.975665	0.233096	-0.0386744	0.504867	21.1183	1.70719	0.091713	0.855884	0	0
hilic	pm2.5	lur	1	0	202.18	38.223	-0.104661	-0.336701	0.12738	20.2476	-0.888116	0.37529	0.933666	-0.0568387	-0.365317	0.25164	20.3714	-0.363578	0.7166	0.972575	-0.207989	-0.538721	0.122743	19.975	-1.25174	0.214358	0.855884	0	0
hilic	pm2.5	lur	1	0	243.083	37.055	0.152046	-0.185402	0.489495	17.9455	0.887195	0.375784	0.933666	0.348095	-0.0533418	0.749531	17.8858	1.71103	0.0887976	0.883312	-0.310969	-0.970768	0.348831	18.077	-0.938112	0.351046	0.895002	0	0
hilic	pm2.5	lur	1	0	214.956	207.606	0.0867785	-0.105965	0.279522	17.9094	0.886512	0.376152	0.933666	0.122457	-0.11974	0.364653	17.9419	0.997682	0.319773	0.961983	0.0380721	-0.302608	0.378752	17.8378	0.222439	0.824546	0.980706	0	0
hilic	pm2.5	lur	1	0	159.157	25.438	0.146849	-0.179401	0.473099	17.1232	0.886283	0.376275	0.933666	0.055352	-0.324897	0.435601	17.1459	0.287239	0.77426	0.986872	0.21444	-0.434614	0.863494	17.073	0.65762	0.512693	0.920114	0	0
hilic	pm2.5	lur	1	0	505.361	37.364	-0.214121	-0.689857	0.261614	17.8069	-0.886227	0.376304	0.933666	-0.313267	-0.992519	0.365985	17.3438	-0.910043	0.364017	0.961983	0.0291211	-0.283967	0.342209	18.8269	0.185136	0.853597	0.980706	0	0
hilic	pm2.5	lur	1	0	97.076	115.801	-0.077206	-0.248754	0.094342	21.4818	-0.886168	0.376336	0.933666	-0.0929486	-0.303335	0.117438	21.5117	-0.871772	0.384494	0.961983	-0.0424311	-0.364158	0.279296	21.4158	-0.262511	0.793611	0.970036	0	0
hilic	pm2.5	lur	1	0	151.001	145.969	0.0750765	-0.091799	0.241952	19.2459	0.885855	0.376505	0.933666	0.0712056	-0.134206	0.276618	19.257	0.684016	0.494845	0.961983	0.115029	-0.190748	0.420805	19.2215	0.748776	0.456215	0.91042	0	0
hilic	pm2.5	lur	1	0	423.33	37.755	-0.271962	-0.877035	0.33311	17.663	-0.885018	0.376955	0.933666	-0.662736	-1.37987	0.0543962	17.4177	-1.82356	0.0698778	0.883312	0.745752	-0.431544	1.92305	18.2032	1.26084	0.211078	0.855884	0	0
hilic	pm2.5	lur	1	0	207.024	79.355	-0.153434	-0.494877	0.188008	20.5219	-0.884822	0.377061	0.933666	-0.20994	-0.660859	0.24098	20.5351	-0.918699	0.359482	0.961983	0.0219244	-0.4725	0.516349	20.4929	0.088263	0.929891	0.992091	0	0
hilic	pm2.5	lur	1	0	600.705	65.647	0.192648	-0.23657	0.621866	19.9118	0.883767	0.377629	0.933666	0.00737023	-0.519123	0.533863	19.7727	0.0276227	0.977994	0.996575	0.653466	-0.132863	1.4398	20.2183	1.65413	0.102069	0.855884	0	0
hilic	pm2.5	lur	1	0	131.083	116.116	0.0865517	-0.106326	0.27943	26.9361	0.883576	0.377732	0.933666	0.0695955	-0.170349	0.30954	26.9335	0.572332	0.567811	0.961983	0.0987312	-0.250906	0.448369	26.9419	0.562065	0.575663	0.925369	0	0
hilic	pm2.5	lur	1	0	330.753	68.587	0.0275919	-0.0339446	0.0891285	25.2952	0.882877	0.378109	0.933666	0.00759639	-0.0664655	0.0816583	25.2915	0.202391	0.83984	0.988245	0.0917395	-0.0369444	0.220423	25.3034	1.419	0.159832	0.855884	0	0
hilic	pm2.5	lur	1	0	361.059	88.861	-0.214797	-0.694181	0.264586	20.0188	-0.882259	0.378442	0.933666	0.0196892	-0.44699	0.486369	20.1494	0.0832508	0.933745	0.990901	-0.729468	-1.8918	0.432867	19.7312	-1.24918	0.215287	0.855884	0	0
hilic	pm2.5	lur	1	0	132.349	116.397	0.211282	-0.260307	0.682871	17.1365	0.882165	0.378493	0.933666	0.22216	-0.345641	0.78996	17.2671	0.772053	0.441096	0.961983	0.433505	-0.451251	1.31826	16.8487	0.97526	0.332408	0.895002	0	0
hilic	pm2.5	lur	1	0	527.296	45.23	0.175212	-0.216384	0.566809	22.0875	0.881002	0.379121	0.933666	0.148294	-0.359658	0.656246	22.0524	0.576075	0.565284	0.961983	0.148083	-0.429576	0.725742	22.1649	0.51025	0.611299	0.92951	0	0
hilic	pm2.5	lur	1	0	176.071	131.051	0.117448	-0.145048	0.379945	19.6383	0.880996	0.379124	0.933666	0.0926634	-0.229485	0.414812	19.5979	0.567585	0.571024	0.962318	0.26054	-0.224663	0.745744	19.727	1.06881	0.288408	0.895002	0	0
hilic	pm2.5	lur	1	0	116.002	177.458	0.115794	-0.14303	0.374617	20.7084	0.88091	0.379171	0.933666	0.150249	-0.14813	0.448627	20.6699	0.993622	0.321741	0.961983	0.0867396	-0.451835	0.625315	20.7932	0.320569	0.749383	0.961695	0	0
hilic	pm2.5	lur	1	0	184.003	279.664	0.088369	-0.109173	0.285911	23.0393	0.88083	0.379214	0.933666	0.118817	-0.118457	0.35609	23.0473	0.988115	0.324423	0.961983	0.00894791	-0.378575	0.396471	23.0217	0.0459594	0.963459	0.998705	0	0
hilic	pm2.5	lur	1	0	659.543	35.576	-0.193694	-0.626921	0.239533	18.3359	-0.880341	0.379478	0.933666	-0.22494	-0.749725	0.299846	18.5739	-0.84579	0.398793	0.961983	-0.1964	-0.999284	0.606484	17.8118	-0.4869	0.627677	0.93368	0	0
hilic	pm2.5	lur	1	0	535.902	36.969	-0.305605	-0.989274	0.378064	17.2016	-0.880167	0.379572	0.933666	-0.551784	-1.51119	0.407623	16.513	-1.13487	0.257941	0.961983	0.190031	-0.388642	0.768703	18.7182	0.653644	0.515239	0.920114	0	0
hilic	pm2.5	lur	1	0	387.882	86.251	-0.183724	-0.595168	0.22772	15.893	-0.879239	0.380074	0.933666	-0.157345	-0.716458	0.401767	15.7785	-0.555307	0.579374	0.963422	-0.232453	-0.730108	0.265202	16.1451	-0.929731	0.355342	0.895002	0	0
hilic	pm2.5	lur	1	0	111.522	271.663	0.0391051	-0.0485147	0.126725	24.9566	0.878783	0.380321	0.933666	0.0292384	-0.042074	0.100551	24.9799	0.809033	0.419564	0.961983	-0.0007545	-0.247824	0.246315	24.9052	-0.0060788	0.995165	0.999568	0	0
hilic	pm2.5	lur	1	0	386.274	39.834	-0.101446	-0.328782	0.12589	22.1381	-0.878653	0.380391	0.933666	0.0461896	-0.217023	0.309402	22.2611	0.346271	0.729544	0.978006	-0.422116	-0.863801	0.0195688	21.8672	-1.90226	0.0607812	0.855884	0	0
hilic	pm2.5	lur	1	0	381.297	60.231	0.0879089	-0.109514	0.285332	23.9509	0.876772	0.38141	0.933666	0.220868	-0.0241029	0.46584	23.9661	1.77908	0.0769137	0.883312	-0.249482	-0.595214	0.0962504	23.9175	-1.43631	0.154861	0.855884	0	0
hilic	pm2.5	lur	1	0	258.15	74.904	0.236337	-0.294487	0.767162	22.0839	0.876663	0.38147	0.933666	0.086734	-0.581859	0.755327	21.8355	0.25598	0.798259	0.986872	0.41907	-0.466427	1.30457	22.631	0.941998	0.349065	0.895002	0	0
hilic	pm2.5	lur	1	0	96.081	27.852	0.0788428	-0.0984345	0.25612	18.7007	0.875709	0.381987	0.933666	0.136499	-0.0733074	0.346306	18.6996	1.28378	0.200871	0.957234	-0.0861151	-0.441784	0.269554	18.7033	-0.481929	0.631188	0.93368	0	0
hilic	pm2.5	lur	1	0	305.247	267.677	-0.0736806	-0.239509	0.0921484	20.3375	-0.87487	0.382443	0.933666	-0.0793015	-0.275075	0.116473	20.3403	-0.79929	0.425176	0.961983	-0.0826627	-0.420539	0.255214	20.3312	-0.48697	0.627628	0.93368	0	0
hilic	pm2.5	lur	1	0	188	43.343	0.223743	-0.279964	0.727449	18.7807	0.874626	0.382575	0.933666	0.162539	-0.411625	0.736704	18.9151	0.5586	0.577129	0.963422	0.406805	-0.645778	1.45939	18.4847	0.769273	0.444025	0.905711	0	0
hilic	pm2.5	lur	1	0	320.082	114.578	-0.231151	-0.751965	0.289664	16.8984	-0.873902	0.382969	0.933666	-0.237205	-0.739128	0.264718	16.7676	-0.932534	0.35231	0.961983	-0.198828	-1.49717	1.09951	17.1863	-0.304817	0.761307	0.964868	0	0
hilic	pm2.5	lur	1	0	121.063	90.503	-0.0836236	-0.272064	0.104816	20.1009	-0.873789	0.38303	0.933666	-0.0548765	-0.275703	0.16595	20.1177	-0.490359	0.624477	0.969915	-0.23381	-0.61389	0.146271	20.0639	-1.22444	0.224425	0.863414	0	0
hilic	pm2.5	lur	1	0	132.081	57.14	-0.0476765	-0.15522	0.0598667	23.4717	-0.872915	0.383505	0.933666	0.00209822	-0.124851	0.129047	23.4992	0.0326136	0.974019	0.996397	-0.160083	-0.380558	0.0603916	23.4111	-1.44523	0.152348	0.855884	0	0
hilic	pm2.5	lur	1	0	317.012	114.321	-0.205004	-0.668016	0.258009	15.6136	-0.871807	0.384109	0.933666	-0.182438	-0.730202	0.365326	15.7178	-0.657203	0.51189	0.961983	-0.0878663	-0.985522	0.809789	15.3842	-0.194833	0.846024	0.980706	0	0
hilic	pm2.5	lur	1	0	1174.26	85.098	-0.161405	-0.525995	0.203186	19.5289	-0.87169	0.384172	0.933666	-0.260301	-0.70894	0.188339	19.5544	-1.14487	0.253783	0.961983	-0.040329	-0.708741	0.628083	19.4726	-0.120095	0.904713	0.992091	0	0
hilic	pm2.5	lur	1	0	469.312	50.774	0.072777	-0.0916866	0.237241	24.6149	0.871316	0.384376	0.933666	0.121613	-0.0890953	0.332322	24.6134	1.13888	0.256268	0.961983	0.0111167	-0.242966	0.265199	24.618	0.0870867	0.930823	0.992091	0	0
hilic	pm2.5	lur	1	0	215.983	270.277	0.0632903	-0.0798112	0.206392	22.9917	0.870851	0.384629	0.933666	0.0136926	-0.145266	0.172651	23.042	0.169973	0.865222	0.989597	0.206461	-0.112084	0.525007	22.8807	1.29008	0.200785	0.855884	0	0
hilic	pm2.5	lur	1	0	548.827	78.227	-0.0764047	-0.249363	0.0965537	23.1201	-0.86982	0.385192	0.933666	-0.044569	-0.247989	0.158851	23.079	-0.432331	0.666018	0.970577	-0.19591	-0.543783	0.151963	23.2105	-1.12095	0.265705	0.886342	0	0
hilic	pm2.5	lur	1	0	562.747	69.715	-0.258083	-0.842486	0.326319	20.0677	-0.869559	0.385334	0.933666	-0.201932	-0.932712	0.528847	19.7922	-0.545252	0.586255	0.963422	-0.478929	-1.44338	0.485525	20.6746	-0.988416	0.325966	0.895002	0	0
hilic	pm2.5	lur	1	0	486.327	39.298	0.303248	-0.383486	0.989982	16.1674	0.869481	0.385377	0.933666	0.71885	-0.112171	1.54987	16.4642	1.70688	0.089568	0.883312	-0.505709	-1.73071	0.719291	15.5136	-0.821703	0.413719	0.905711	0	0
hilic	pm2.5	lur	1	0	458.876	69.803	0.127788	-0.162953	0.418529	21.1878	0.865435	0.387589	0.933666	0.296937	-0.0449407	0.638814	21.2241	1.71385	0.0882787	0.883312	-0.229095	-0.808188	0.349998	21.108	-0.787439	0.43338	0.905711	0	0
hilic	pm2.5	lur	1	0	446.716	68.392	-0.285558	-0.935788	0.364672	21.4233	-0.864726	0.387977	0.933666	-0.455916	-1.20599	0.294152	21.5088	-1.1994	0.231951	0.961983	-0.0067352	-1.28071	1.26724	21.2349	-0.010523	0.991631	0.999568	0	0
hilic	pm2.5	lur	1	0	359.298	38.439	-0.297535	-0.975104	0.380033	18.9058	-0.864642	0.388023	0.933666	-0.24537	-1.03504	0.544304	19.2023	-0.613129	0.540565	0.961983	-0.824365	-2.1748	0.526068	18.2528	-1.21506	0.227963	0.863918	0	0
hilic	pm2.5	lur	1	0	522.576	48.362	-0.315071	-1.03272	0.402575	16.7829	-0.864468	0.388118	0.933666	-0.0978207	-1.03427	0.838627	17.3567	-0.206123	0.836928	0.988245	-0.825232	-1.92208	0.271612	15.5191	-1.49755	0.138234	0.855884	0	0
hilic	pm2.5	lur	1	0	463.845	38.144	-0.140946	-0.462042	0.180149	19.2845	-0.864312	0.388204	0.933666	-0.086867	-0.516213	0.342479	18.8633	-0.399232	0.690195	0.970577	-0.199012	-0.623501	0.225478	20.2121	-0.933171	0.353574	0.895002	0	0
hilic	pm2.5	lur	1	0	1142.22	67.938	0.0733245	-0.0938864	0.240535	21.6571	0.863446	0.388679	0.933666	-0.0184855	-0.244456	0.207485	21.614	-0.16142	0.871943	0.989597	0.224783	0.0133853	0.436181	21.752	2.11648	0.0374519	0.855884	0	0
hilic	pm2.5	lur	1	0	132.102	61.185	-0.0457924	-0.15024	0.058655	32.4237	-0.86327	0.388775	0.933666	-0.0067334	-0.131966	0.118499	32.4919	-0.106095	0.915625	0.990901	-0.140825	-0.348872	0.0672214	32.2733	-1.34732	0.181729	0.855884	0	0
hilic	pm2.5	lur	1	0	132.105	85.204	0.200181	-0.256734	0.657095	16.9089	0.862657	0.389112	0.933666	0.183215	-0.389924	0.756355	16.7909	0.630783	0.528983	0.961983	0.266316	-0.533493	1.06612	17.1687	0.662767	0.509408	0.920114	0	0
hilic	pm2.5	lur	1	0	134.109	58.658	-0.0654773	-0.214948	0.0839932	23.0451	-0.862554	0.389169	0.933666	0.00069034	-0.180386	0.181767	23.1109	0.00752278	0.994006	0.996575	-0.231703	-0.516708	0.0533024	22.9003	-1.61819	0.109608	0.855884	0	0
hilic	pm2.5	lur	1	0	635.878	84.25	0.0437551	-0.0561585	0.143669	24.9484	0.862294	0.389311	0.933666	0.0377312	-0.089339	0.164801	24.9684	0.585916	0.558666	0.961983	0.0609299	-0.117094	0.238954	24.9043	0.681243	0.49771	0.920114	0	0
hilic	pm2.5	lur	1	0	176.111	87.27	-0.260459	-0.855606	0.334688	18.0244	-0.861719	0.389627	0.933666	-0.110882	-0.816193	0.594428	18.0599	-0.310213	0.756757	0.984574	-0.60904	-1.74725	0.529174	17.9464	-1.06506	0.290095	0.895002	0	0
hilic	pm2.5	lur	1	0	362.837	65.23	-0.251216	-0.826445	0.324013	19.3862	-0.85992	0.390616	0.933666	-0.562997	-1.24014	0.114151	19.4143	-1.64059	0.102628	0.885563	0.591146	-0.50438	1.68667	19.3242	1.07404	0.286072	0.895002	0	0
hilic	pm2.5	lur	1	0	152.991	230.953	0.127853	-0.165012	0.420718	21.3201	0.859598	0.390794	0.933666	0.0196755	-0.320753	0.360104	21.0242	0.114045	0.909329	0.990901	0.331824	-0.245178	0.908825	21.972	1.14467	0.255802	0.883262	0	0
hilic	pm2.5	lur	1	0	232.896	66.19	0.0272971	-0.0353107	0.0899049	25.5666	0.858498	0.391399	0.933666	0.0317905	-0.0452295	0.108811	25.5614	0.814464	0.416456	0.961983	0.0487098	-0.0747998	0.172219	25.578	0.784993	0.434805	0.905711	0	0
hilic	pm2.5	lur	1	0	285.242	26.132	0.0705252	-0.0912474	0.232298	18.4028	0.858401	0.391453	0.933666	0.111473	-0.083642	0.306588	18.3568	1.12735	0.261097	0.961983	-0.0288868	-0.339807	0.282033	18.5043	-0.184927	0.85376	0.980706	0	0
hilic	pm2.5	lur	1	0	252.94	139.536	0.181828	-0.235356	0.599012	17.1015	0.858192	0.391568	0.933666	0.0314456	-0.495579	0.55847	17.0598	0.117736	0.906408	0.990901	0.366415	-0.327262	1.06009	17.1936	1.0514	0.296282	0.895002	0	0
hilic	pm2.5	lur	1	0	125.964	294.752	0.138661	-0.179598	0.456921	20.4814	0.857876	0.391742	0.933666	0.0909453	-0.303717	0.485608	20.4989	0.454708	0.649867	0.970577	0.218967	-0.355412	0.793347	20.443	0.758806	0.450226	0.906204	0	0
hilic	pm2.5	lur	1	0	136.043	74.278	0.145614	-0.18862	0.479849	22.226	0.857835	0.391765	0.933666	0.0640102	-0.329849	0.457869	22.2755	0.320691	0.748817	0.98273	0.400894	-0.256432	1.05822	22.1168	1.21394	0.228385	0.863918	0	0
hilic	pm2.5	lur	1	0	408.31	33.534	0.267577	-0.347494	0.882648	18.137	0.856592	0.39245	0.933666	0.616759	-0.106657	1.34017	18.3126	1.68231	0.0942431	0.883312	-0.499523	-1.69366	0.694617	17.7503	-0.832627	0.407565	0.904707	0	0
hilic	pm2.5	lur	1	0	223.169	124.425	-0.094561	-0.312025	0.122903	20.3219	-0.856201	0.392666	0.933666	0.0460783	-0.235129	0.327286	20.2542	0.323331	0.74682	0.982258	-0.378551	-0.702375	-0.0547274	20.4711	-2.32684	0.0225364	0.855884	0	0
hilic	pm2.5	lur	1	0	226.012	274.875	0.0473597	-0.0615938	0.156313	22.2148	0.855892	0.392837	0.933666	0.0920614	-0.0102324	0.194355	22.2604	1.77585	0.0774473	0.883312	-0.0853537	-0.369849	0.199141	22.1145	-0.59717	0.552101	0.920494	0	0
hilic	pm2.5	lur	1	0	113.035	291.874	0.0848363	-0.110848	0.28052	22.8574	0.853645	0.394078	0.933666	0.0483456	-0.100794	0.197486	22.9158	0.639648	0.523215	0.961983	0.232098	-0.336826	0.801022	22.7286	0.812022	0.419219	0.905711	0	0
hilic	pm2.5	lur	1	0	332.005	269.182	0.0745205	-0.0974461	0.246487	19.3202	0.853263	0.39429	0.933666	0.0983313	-0.0955942	0.292257	19.3333	1.00054	0.318392	0.961983	0.066737	-0.306435	0.439909	19.2914	0.355965	0.722815	0.953181	0	0
hilic	pm2.5	lur	1	0	374.298	38.381	0.0916435	-0.119986	0.303273	20.0175	0.852663	0.394622	0.933666	0.268326	0.00179296	0.534859	20.0675	1.98651	0.0484947	0.883312	-0.213286	-0.563507	0.136935	19.9074	-1.21219	0.229052	0.864036	0	0
hilic	pm2.5	lur	1	0	251	276.01	0.193325	-0.253736	0.640387	20.0626	0.851475	0.39528	0.933666	0.474001	-0.0930681	1.04107	20.0741	1.64938	0.100813	0.885563	-0.353016	-1.09048	0.384444	20.0372	-0.952809	0.343593	0.895002	0	0
hilic	pm2.5	lur	1	0	216.94	255.142	0.200031	-0.263117	0.663178	19.9898	0.85041	0.395871	0.933666	0.194522	-0.381973	0.771017	19.9584	0.665811	0.506384	0.961983	0.348829	-0.447393	1.14505	20.0588	0.872025	0.385837	0.895002	0	0
hilic	pm2.5	lur	1	0	299.126	275.403	-0.084196	-0.279183	0.11079	19.7922	-0.850233	0.395969	0.933666	0.00115179	-0.237896	0.2402	19.758	0.00950749	0.992425	0.996575	-0.290116	-0.651532	0.0712993	19.8675	-1.59777	0.114085	0.855884	0	0
hilic	pm2.5	lur	1	0	270.154	33.759	0.240519	-0.316846	0.797884	17.31	0.849691	0.39627	0.933666	0.238867	-0.479233	0.956966	17.4346	0.656371	0.512424	0.961983	0.278707	-0.624988	1.1824	17.0356	0.61387	0.541065	0.920494	0	0
hilic	pm2.5	lur	1	0	579.498	36.155	-0.239904	-0.796444	0.316636	18.2006	-0.848773	0.396779	0.933666	-0.0812583	-0.750513	0.587996	18.3971	-0.239582	0.810927	0.987696	-0.719137	-1.77919	0.340914	17.7679	-1.35032	0.18077	0.855884	0	0
hilic	pm2.5	lur	1	0	174.957	272.018	0.101706	-0.134294	0.337707	24.1762	0.848569	0.396893	0.933666	0.069962	-0.238465	0.378389	24.1968	0.447597	0.654982	0.970577	0.238457	-0.118386	0.5953	24.1309	1.3301	0.187313	0.855884	0	0
hilic	pm2.5	lur	1	0	476.306	44.819	0.347506	-0.459064	1.15408	20.244	0.848342	0.397019	0.933666	0.688736	-0.260516	1.63799	20.6526	1.43169	0.153966	0.923119	-0.483684	-2.08137	1.114	19.3443	-0.602588	0.548508	0.920494	0	0
hilic	pm2.5	lur	1	0	192.845	251.241	0.144499	-0.190965	0.479963	20.7304	0.848145	0.397128	0.933666	0.165943	-0.285507	0.617393	20.6928	0.725316	0.4692	0.961983	0.120517	-0.317681	0.558715	20.8132	0.54743	0.585627	0.927631	0	0
hilic	pm2.5	lur	1	0	181.086	28.752	-0.0948989	-0.315289	0.125492	20.126	-0.84785	0.397292	0.933666	-0.160877	-0.421573	0.0998187	20.2096	-1.2177	0.224934	0.961983	0.0242915	-0.410352	0.458935	19.9419	0.111243	0.911706	0.992091	0	0
hilic	pm2.5	lur	1	0	570.97	87.079	-0.25452	-0.846248	0.337207	17.5895	-0.846937	0.3978	0.933666	-0.653533	-1.32346	0.0163984	17.3271	-1.92493	0.0558147	0.883312	0.367217	-0.842229	1.57666	18.1675	0.604347	0.547344	0.920494	0	0
hilic	pm2.5	lur	1	0	256.821	72.9	0.0294682	-0.0392941	0.0982305	28.0819	0.843829	0.399532	0.933666	0.00604264	-0.0790427	0.091128	28.0788	0.140136	0.888709	0.990901	0.0869802	-0.0503369	0.224297	28.089	1.2608	0.211092	0.855884	0	0
hilic	pm2.5	lur	1	0	98.961	285.931	0.051208	-0.0683045	0.170721	21.3664	0.843675	0.399618	0.933666	-0.0072002	-0.113822	0.0994217	21.4169	-0.133252	0.894143	0.990901	0.148048	-0.174064	0.470159	21.2551	0.914842	0.363058	0.895002	0	0
hilic	pm2.5	lur	1	0	428.935	113.482	0.207634	-0.277049	0.692317	15.6685	0.843513	0.399708	0.933666	0.480204	-0.0712661	1.03167	15.5358	1.71823	0.0874739	0.883312	-0.413688	-1.44467	0.617299	15.9606	-0.798674	0.426873	0.905711	0	0
hilic	pm2.5	lur	1	0	1034.33	67.999	0.0475681	-0.0635635	0.1587	22.6214	0.842809	0.400101	0.933666	0.0317823	-0.114557	0.178121	22.6138	0.428552	0.668762	0.970577	0.0818912	-0.0922406	0.256023	22.6383	0.936073	0.352088	0.895002	0	0
hilic	pm2.5	lur	1	0	195.026	231.854	0.223391	-0.298633	0.745416	19.5406	0.842609	0.400213	0.933666	0.0340117	-0.592351	0.660375	19.1639	0.107147	0.914792	0.990901	0.641632	-0.318046	1.60131	20.3702	1.33079	0.187084	0.855884	0	0
hilic	pm2.5	lur	1	0	253.216	31.19	-0.0837808	-0.279581	0.112019	20.5054	-0.842525	0.40026	0.933666	-0.0937029	-0.346399	0.158993	20.4223	-0.731699	0.465304	0.961983	-0.0703575	-0.383025	0.24231	20.6883	-0.447897	0.655453	0.939554	0	0
hilic	pm2.5	lur	1	0	157.074	114.85	0.077663	-0.103863	0.259189	24.8592	0.842416	0.40032	0.933666	0.0912151	-0.141869	0.324299	24.9649	0.772205	0.441006	0.961983	0.0127607	-0.287034	0.312555	24.6264	0.0847231	0.932696	0.992091	0	0
hilic	pm2.5	lur	1	0	314.031	88.081	0.210945	-0.282114	0.704005	19.3502	0.842406	0.400326	0.933666	0.277228	-0.255106	0.809562	19.4896	1.02762	0.305509	0.961983	-0.0419263	-1.17197	1.08812	19.0432	-0.0738484	0.941318	0.992091	0	0
hilic	pm2.5	lur	1	0	142.869	59.805	0.151225	-0.203086	0.505536	19.12	0.840409	0.401442	0.933666	0.0418362	-0.419265	0.502937	18.9857	0.179033	0.858113	0.989597	0.459748	-0.0792689	0.998764	19.4158	1.69773	0.0934949	0.855884	0	0
hilic	pm2.5	lur	1	0	740.763	76.847	-0.217565	-0.727423	0.292291	19.3096	-0.840219	0.401549	0.933666	0.070746	-0.501843	0.643335	19.2576	0.243802	0.807662	0.987223	-0.998676	-2.06432	0.0669632	19.4241	-1.86537	0.0658418	0.855884	0	0
hilic	pm2.5	lur	1	0	313.035	85.169	-0.0735552	-0.246054	0.0989433	23.8253	-0.839613	0.401888	0.933666	-0.149475	-0.366541	0.0675914	23.7895	-1.35879	0.175912	0.940505	0.0434966	-0.248435	0.335429	23.9039	0.296568	0.767574	0.965399	0	0
hilic	pm2.5	lur	1	0	166.991	289.374	0.219149	-0.29509	0.733388	19.1737	0.839123	0.402162	0.933666	0.246163	-0.344346	0.836672	19.2387	0.822573	0.411839	0.961983	0.0389962	-0.991154	1.06915	19.0306	0.075348	0.940128	0.992091	0	0
hilic	pm2.5	lur	1	0	577.519	36.478	-0.251999	-0.84382	0.339821	15.8002	-0.838417	0.402558	0.933666	-0.100543	-0.862521	0.661436	15.9478	-0.260367	0.794879	0.986872	-0.429715	-1.34544	0.48601	15.4752	-0.934041	0.353129	0.895002	0	0
hilic	pm2.5	lur	1	0	470.852	38.239	0.152754	-0.20624	0.511747	20.3702	0.837831	0.402886	0.933666	0.285761	-0.215652	0.787174	19.995	1.12457	0.26227	0.961983	-0.0328888	-0.370607	0.304829	21.1965	-0.19384	0.846799	0.980706	0	0
hilic	pm2.5	lur	1	0	348.289	36.162	0.282645	-0.382015	0.947306	15.0926	0.837323	0.403171	0.933666	0.077938	-0.723161	0.879037	15.2898	0.191974	0.847979	0.989597	0.862061	-0.402155	2.12628	14.6584	1.35727	0.178559	0.855884	0	0
hilic	pm2.5	lur	1	0	86.096	60.487	-0.0455422	-0.152658	0.0615736	29.5449	-0.837165	0.40326	0.933666	-0.0054268	-0.133396	0.122542	29.6057	-0.0836797	0.933404	0.990901	-0.138736	-0.354426	0.0769542	29.4109	-1.28029	0.204188	0.855884	0	0
hilic	pm2.5	lur	1	0	648.519	36.041	0.20713	-0.280308	0.694569	17.7797	0.83671	0.403515	0.933666	-0.0328483	-0.640008	0.574311	18.0024	-0.106755	0.915102	0.990901	0.739534	-0.0584568	1.53752	17.2894	1.84464	0.0688382	0.855884	0	0
hilic	pm2.5	lur	1	0	598.529	67.289	0.256125	-0.346643	0.858893	13.8848	0.836667	0.403539	0.933666	0.202598	-0.526182	0.931378	13.7587	0.548551	0.583994	0.963422	0.361633	-0.787198	1.51046	14.1627	0.626559	0.532755	0.920494	0	0
hilic	pm2.5	lur	1	0	95.397	51.218	0.316127	-0.42794	1.06019	17.6767	0.836566	0.403596	0.933666	0.347532	-0.594303	1.28937	17.5136	0.728112	0.467491	0.961983	0.554356	-0.677347	1.78606	18.0357	0.895845	0.373057	0.895002	0	0
hilic	pm2.5	lur	1	0	184.17	27.212	0.123696	-0.167757	0.415149	16.3304	0.835675	0.404096	0.933666	0.0316538	-0.306244	0.369552	16.2815	0.184849	0.853555	0.989597	0.344757	-0.256841	0.946355	16.4381	1.14066	0.257456	0.883262	0	0
hilic	pm2.5	lur	1	0	504.871	71.618	-0.161968	-0.543706	0.219771	21.5515	-0.835438	0.404229	0.933666	-0.220904	-0.725086	0.283279	21.4816	-0.864556	0.388433	0.961983	0.0772142	-0.464224	0.618653	21.7056	0.283856	0.777263	0.965845	0	0
hilic	pm2.5	lur	1	0	157.084	284.831	-0.0638777	-0.214511	0.0867558	22.12	-0.834985	0.404484	0.933666	-0.0183237	-0.203098	0.166451	22.1492	-0.195681	0.84508	0.989597	-0.133457	-0.416143	0.149228	22.0558	-0.939698	0.350236	0.895002	0	0
hilic	pm2.5	lur	1	0	209.017	66	-0.207719	-0.697562	0.282124	18.7013	-0.83497	0.404493	0.933666	0.0453204	-0.523664	0.614304	18.5837	0.157171	0.875286	0.989597	-0.811357	-1.78148	0.15877	18.9604	-1.66469	0.0999353	0.855884	0	0
hilic	pm2.5	lur	1	0	138.043	55.291	0.182307	-0.247718	0.612332	21.0431	0.834758	0.404612	0.933666	-0.0332905	-0.585036	0.518455	20.8525	-0.119058	0.905362	0.990901	0.63022	-0.0533073	1.31375	21.4628	1.83521	0.0702371	0.855884	0	0
hilic	pm2.5	lur	1	0	115.039	287.854	0.0741565	-0.101083	0.249396	21.2876	0.833236	0.405467	0.934847	0.111538	-0.10618	0.329257	21.304	1.0109	0.313423	0.961983	0.0244343	-0.287329	0.336198	21.2514	0.156	0.876431	0.984444	0	0
hilic	pm2.5	lur	1	0	139.028	147.496	0.120629	-0.164926	0.406185	18.5199	0.831789	0.406283	0.935129	0.130381	-0.22715	0.487911	18.4204	0.719579	0.472717	0.961983	0.148555	-0.352724	0.649834	18.7392	0.589871	0.55696	0.920494	0	0
hilic	pm2.5	lur	1	0	1247.77	85.672	0.145158	-0.198699	0.489015	21.403	0.831218	0.406605	0.935129	0.0666762	-0.332722	0.466075	21.4117	0.329414	0.742225	0.982115	0.254169	-0.45145	0.959789	21.3839	0.716972	0.475505	0.919047	0	0
hilic	pm2.5	lur	1	0	156.991	287.146	0.109024	-0.149389	0.367436	23.9142	0.830727	0.406881	0.935129	0.0286481	-0.241866	0.299162	23.9809	0.20897	0.834708	0.988245	0.242586	-0.370346	0.855518	23.7672	0.787778	0.433184	0.905711	0	0
hilic	pm2.5	lur	1	0	292.978	118.802	-0.146441	-0.493603	0.200722	17.3949	-0.830575	0.406967	0.935129	-0.0648887	-0.458282	0.328504	17.355	-0.325477	0.745198	0.982258	-0.296668	-1.04471	0.451372	17.4828	-0.789398	0.432242	0.905711	0	0
hilic	pm2.5	lur	1	0	310.201	41.563	0.0729444	-0.100135	0.246024	25.957	0.829847	0.407378	0.935281	0.00860015	-0.20644	0.223641	25.9315	0.0789157	0.937187	0.990901	0.169941	-0.140604	0.480485	26.0132	1.08924	0.279359	0.895002	0	0
hilic	pm2.5	lur	1	0	369.123	118.75	-0.115904	-0.391552	0.159745	20.5504	-0.827928	0.408462	0.935841	-0.115356	-0.481332	0.25062	20.498	-0.621965	0.534752	0.961983	-0.0968273	-0.490088	0.296433	20.6658	-0.490081	0.625435	0.93368	0	0
hilic	pm2.5	lur	1	0	501.987	79.728	-0.148651	-0.502264	0.204962	16.4938	-0.827732	0.408573	0.935841	-0.119822	-0.566703	0.327058	16.4867	-0.529084	0.597399	0.966918	-0.173978	-0.773565	0.425609	16.5093	-0.577555	0.565207	0.922887	0	0
hilic	pm2.5	lur	1	0	153.04	132.431	-0.0554307	-0.187515	0.0766531	21.3021	-0.826327	0.409368	0.935841	-0.0437497	-0.21146	0.123961	21.301	-0.514746	0.607362	0.967904	-0.0834959	-0.30965	0.142658	21.3047	-0.73487	0.464594	0.911732	0	0
hilic	pm2.5	lur	1	0	644.686	66.193	0.0537676	-0.0743902	0.181925	23.7771	0.826089	0.409502	0.935841	0.121977	-0.0218564	0.265811	23.7621	1.67339	0.0959882	0.883312	-0.0954177	-0.379802	0.188966	23.81	-0.667842	0.50618	0.920114	0	0
hilic	pm2.5	lur	1	0	224.1	42.441	0.143905	-0.199516	0.487326	19.2628	0.825087	0.41007	0.935841	0.300334	-0.131227	0.731896	19.3247	1.37322	0.171392	0.93851	-0.16645	-0.73345	0.40055	19.1266	-0.584319	0.56067	0.921156	0	0
hilic	pm2.5	lur	1	0	222.956	102.266	-0.223642	-0.758018	0.310733	18.0181	-0.824059	0.410652	0.935841	0.0478289	-0.578754	0.674412	18.0423	0.150623	0.880442	0.990589	-0.861289	-1.91759	0.195009	17.9648	-1.62298	0.108578	0.855884	0	0
hilic	pm2.5	lur	1	0	137.096	130.706	-0.158888	-0.538703	0.220927	20.1607	-0.823702	0.410855	0.935841	-0.244014	-0.704866	0.216838	20.2525	-1.0448	0.297519	0.961983	0.0659347	-0.656545	0.788414	19.9584	0.181651	0.856322	0.980706	0	0
hilic	pm2.5	lur	1	0	330.246	37.973	-0.109838	-0.373545	0.15387	21.8914	-0.820124	0.412888	0.935841	-0.200912	-0.520631	0.118806	21.9236	-1.23999	0.216594	0.961983	-0.0442648	-0.498839	0.41031	21.8205	-0.193822	0.846812	0.980706	0	0
hilic	pm2.5	lur	1	0	274.872	64.004	0.140625	-0.197142	0.478393	19.2755	0.819778	0.413085	0.935841	0.210803	-0.205035	0.626641	19.3926	1.0003	0.318508	0.961983	0.0644818	-0.54106	0.670023	19.0177	0.211955	0.832688	0.980706	0	0
hilic	pm2.5	lur	1	0	151.048	94.49	0.0401492	-0.0563969	0.136695	24.9782	0.818829	0.413625	0.935841	0.0360203	-0.0792997	0.15134	25.0274	0.616341	0.538449	0.961983	0.0609833	-0.136018	0.257985	24.8698	0.616157	0.539562	0.920494	0	0
hilic	pm2.5	lur	1	0	477.005	95.554	-0.19475	-0.663251	0.273751	16.6202	-0.818499	0.413813	0.935841	-0.245835	-0.790944	0.299274	16.5949	-0.889895	0.37471	0.961983	-0.0464201	-1.01123	0.918385	16.676	-0.0957673	0.923948	0.992091	0	0
hilic	pm2.5	lur	1	0	198.128	36.477	-0.271192	-0.923594	0.38121	19.8583	-0.818488	0.413819	0.935841	-0.133686	-0.947964	0.680593	20.9677	-0.323959	0.746345	0.982258	-0.759095	-1.85914	0.340949	17.4152	-1.37352	0.173474	0.855884	0	0
hilic	pm2.5	lur	1	0	351.215	38.794	-0.24024	-0.818564	0.338083	17.6254	-0.817949	0.414127	0.935841	-0.116301	-0.882687	0.650086	17.7421	-0.299442	0.764949	0.986515	-0.405537	-1.22612	0.415049	17.3683	-0.983686	0.328273	0.895002	0	0
hilic	pm2.5	lur	1	0	268.876	143.503	0.220421	-0.310275	0.751117	17.8072	0.81782	0.4142	0.935841	-0.0752443	-0.730356	0.579867	17.7156	-0.22664	0.820961	0.988245	1.02159	0.111921	1.93125	18.009	2.23534	0.0282179	0.855884	0	0
hilic	pm2.5	lur	1	0	479.335	44.178	-0.262808	-0.895686	0.370069	20.5293	-0.817656	0.414294	0.935841	-0.0961298	-0.765438	0.573179	20.8415	-0.283406	0.777191	0.986872	-0.537349	-1.94711	0.872411	19.8416	-0.758685	0.450299	0.906204	0	0
hilic	pm2.5	lur	1	0	254.026	73.127	-0.060014	-0.204552	0.0845239	22.1136	-0.817564	0.414346	0.935841	-0.0339984	-0.196846	0.128849	22.1472	-0.411961	0.680858	0.970577	-0.171588	-0.480347	0.137171	22.0396	-1.10616	0.272015	0.892262	0	0
hilic	pm2.5	lur	1	0	133.105	60.481	-0.0440227	-0.150061	0.0620157	28.4562	-0.817456	0.414408	0.935841	-0.005905	-0.132705	0.120895	28.5262	-0.0918912	0.926887	0.990901	-0.134918	-0.34721	0.0773745	28.302	-1.26499	0.209595	0.855884	0	0
hilic	pm2.5	lur	1	0	348.274	31.463	-0.121376	-0.414024	0.171271	17.248	-0.816658	0.414863	0.935841	-0.168808	-0.555757	0.218142	17.2738	-0.860828	0.390478	0.961983	0.0878712	-0.329837	0.50558	17.1911	0.41872	0.676557	0.944244	0	0
hilic	pm2.5	lur	1	0	112.076	30.888	0.0649904	-0.0918708	0.221852	20.3188	0.815802	0.415352	0.935841	0.0787749	-0.101706	0.259256	20.3197	0.86126	0.390241	0.961983	-0.0540411	-0.377299	0.269217	20.317	-0.332755	0.7402	0.95961	0	0
hilic	pm2.5	lur	1	0	462.779	66.681	0.04902	-0.0693525	0.167393	24.5086	0.815405	0.415578	0.935841	0.125474	-0.0030582	0.254006	24.5121	1.92628	0.0556446	0.883312	-0.111917	-0.384349	0.160515	24.501	-0.817689	0.415993	0.905711	0	0
hilic	pm2.5	lur	1	0	208.048	110.541	-0.158072	-0.540097	0.223952	17.9157	-0.814734	0.415962	0.935841	-0.437615	-0.850888	-0.024342	17.8424	-2.08946	0.0380726	0.883312	0.639631	-0.175819	1.45508	18.0772	1.56129	0.122453	0.855884	0	0
hilic	pm2.5	lur	1	0	288.997	109.027	-0.186507	-0.637393	0.26438	16.8516	-0.814475	0.41611	0.935841	-0.0461108	-0.599363	0.507142	17.1808	-0.164459	0.869555	0.989597	-0.171593	-0.947838	0.604653	16.1266	-0.439997	0.661141	0.941473	0	0
hilic	pm2.5	lur	1	0	599.464	35.889	-0.175031	-0.598657	0.248596	15.2251	-0.813546	0.416641	0.935841	-0.16176	-0.653182	0.329662	15.2169	-0.649523	0.516829	0.961983	-0.196431	-1.04124	0.648383	15.2433	-0.462806	0.644776	0.937675	0	0
hilic	pm2.5	lur	1	0	506.672	67.971	0.162818	-0.231492	0.557127	16.5472	0.813047	0.416926	0.935841	0.142351	-0.318301	0.603004	16.5441	0.60977	0.542783	0.961983	0.236794	-0.553502	1.02709	16.5539	0.596392	0.552619	0.920494	0	0
hilic	pm2.5	lur	1	0	112.978	168.343	0.120327	-0.171233	0.411887	22.8944	0.812618	0.417172	0.935841	0.194052	-0.196273	0.584376	22.904	0.981001	0.327909	0.961983	-0.0149366	-0.380345	0.350472	22.8733	-0.0813625	0.935359	0.992091	0	0
hilic	pm2.5	lur	1	0	247.082	122.555	-0.166824	-0.571137	0.237489	17.7188	-0.812441	0.417273	0.935841	0.0397915	-0.451051	0.530634	17.6558	0.159965	0.873088	0.989597	-0.50527	-1.25217	0.241634	17.8577	-1.34651	0.181989	0.855884	0	0
hilic	pm2.5	lur	1	0	214.004	291.777	0.15749	-0.224431	0.539411	20.0098	0.811951	0.417554	0.935841	0.227443	-0.25035	0.705236	19.9528	0.939315	0.348828	0.961983	-0.0107855	-0.664013	0.642442	20.1355	-0.0328644	0.973866	0.998705	0	0
hilic	pm2.5	lur	1	0	443.309	39.612	-0.186339	-0.63831	0.265632	17.4927	-0.811791	0.417645	0.935841	-0.0950621	-0.586093	0.395968	17.4562	-0.382012	0.702903	0.970577	-0.481111	-1.48326	0.521034	17.5733	-0.955575	0.342201	0.895002	0	0
hilic	pm2.5	lur	1	0	206.056	126.748	0.133184	-0.190053	0.456422	20.0646	0.8113	0.417927	0.935841	0.285223	-0.123572	0.694017	20.0064	1.37676	0.170298	0.934401	-0.161223	-0.707712	0.385267	20.1927	-0.587211	0.558736	0.921156	0	0
hilic	pm2.5	lur	1	0	593.497	36.434	-0.252629	-0.866214	0.360956	15.6546	-0.810699	0.418271	0.935841	0.0209056	-0.713782	0.755593	15.5903	0.0561486	0.955286	0.991368	-0.75735	-1.91547	0.400766	15.7962	-1.30165	0.196818	0.855884	0	0
hilic	pm2.5	lur	1	0	115.073	49.929	-0.0662714	-0.227277	0.0947342	22.3087	-0.810468	0.418404	0.935841	-0.10668	-0.308799	0.0954389	22.3827	-1.04149	0.299046	0.961983	-0.0121847	-0.292894	0.268525	22.1459	-0.0863985	0.931368	0.992091	0	0
hilic	pm2.5	lur	1	0	249.08	118.118	-0.179703	-0.616518	0.257112	16.0012	-0.810043	0.418648	0.935841	-0.222306	-0.750815	0.306202	15.7233	-0.829999	0.407639	0.961983	-0.134936	-0.94896	0.679088	16.6134	-0.329944	0.742316	0.95961	0	0
hilic	pm2.5	lur	1	0	450.379	37.634	0.217976	-0.313704	0.749656	19.2514	0.807253	0.42025	0.93865	0.594936	0.00621979	1.18365	19.5452	1.99408	0.0476533	0.883312	-0.266597	-1.3954	0.862211	18.6043	-0.470094	0.639583	0.937675	0	0
hilic	pm2.5	lur	1	0	485.812	66.328	-0.255698	-0.880281	0.368885	16.6957	-0.8061	0.420914	0.93936	-0.0003305	-0.766033	0.765372	16.978	-0.0008517	0.999321	0.999321	-0.988352	-2.11185	0.135148	16.0739	-1.75101	0.083825	0.855884	0	0
hilic	pm2.5	lur	1	0	363.216	41.092	-0.10242	-0.3528	0.14796	21.8165	-0.805444	0.421291	0.93943	-0.0838931	-0.392889	0.225103	21.9182	-0.535736	0.592802	0.964792	-0.157605	-0.605669	0.290458	21.5925	-0.700135	0.485899	0.920114	0	0
hilic	pm2.5	lur	1	0	387.275	37.922	0.14921	-0.215889	0.51431	19.8397	0.804708	0.421715	0.939605	0.255103	-0.17808	0.688287	19.9447	1.16204	0.246757	0.961983	-0.0373318	-0.733367	0.658704	19.6083	-0.106757	0.915252	0.992091	0	0
hilic	pm2.5	lur	1	0	120.003	86.774	0.0423273	-0.0614028	0.146057	25.789	0.803464	0.422432	0.940046	0.0628183	-0.0558184	0.181455	25.7924	1.04483	0.297503	0.961983	-0.0024914	-0.230623	0.22564	25.7815	-0.0217377	0.982712	0.999158	0	0
hilic	pm2.5	lur	1	0	114.893	64.275	0.0525274	-0.076248	0.181303	23.9268	0.803163	0.422606	0.940046	-0.0106207	-0.162883	0.141642	23.9042	-0.137638	0.89068	0.990901	0.212668	-0.0407999	0.466136	23.9764	1.67005	0.0988668	0.855884	0	0
hilic	pm2.5	lur	1	0	315.235	42.046	0.0996716	-0.144991	0.344334	23.8426	0.80215	0.42319	0.940384	-0.0203206	-0.334459	0.293818	23.805	-0.127642	0.898575	0.990901	0.316181	-0.0684947	0.700858	23.9254	1.63603	0.105811	0.855884	0	0
hilic	pm2.5	lur	1	0	1156.24	67.594	-0.241272	-0.833852	0.351307	18.3742	-0.8017	0.42345	0.940384	-0.317462	-1.01397	0.37905	18.2729	-0.899377	0.369654	0.961983	-0.175842	-1.32464	0.972955	18.5972	-0.30467	0.761418	0.964868	0	0
hilic	pm2.5	lur	1	0	393.799	68.118	-0.177005	-0.612088	0.258079	19.955	-0.801057	0.423822	0.940441	-0.39331	-0.937233	0.150613	19.8554	-1.42684	0.155358	0.92383	0.330951	-0.418176	1.08008	20.1745	0.879344	0.381881	0.895002	0	0
hilic	pm2.5	lur	1	0	370.868	70.285	-0.0610628	-0.211417	0.0892912	21.1971	-0.799673	0.424622	0.940619	-0.0025402	-0.1859	0.18082	21.1927	-0.0273361	0.978222	0.996575	-0.167489	-0.453221	0.118243	21.2067	-1.16675	0.246821	0.880901	0	0
hilic	pm2.5	lur	1	0	266.038	59.227	-0.199248	-0.689974	0.291478	21.2595	-0.799478	0.424735	0.940619	0.0405828	-0.558191	0.639357	21.2339	0.133739	0.893758	0.990901	-0.664345	-1.5795	0.25081	21.3157	-1.44494	0.15243	0.855884	0	0
hilic	pm2.5	lur	1	0	219.891	144.307	0.136689	-0.200379	0.473758	17.212	0.798487	0.425309	0.940619	0.032781	-0.388535	0.454096	17.1026	0.15353	0.878153	0.990063	0.30038	-0.284097	0.884856	17.453	1.02295	0.309454	0.895002	0	0
hilic	pm2.5	lur	1	0	594.509	36.255	-0.253983	-0.880734	0.372767	16.6634	-0.797924	0.425634	0.940619	-0.247354	-0.977109	0.482401	16.7957	-0.668836	0.504457	0.961983	-0.541517	-1.79333	0.710297	16.3722	-0.861039	0.391822	0.895002	0	0
hilic	pm2.5	lur	1	0	1144.22	67.937	0.0652062	-0.0957027	0.226115	21.4387	0.797921	0.425636	0.940619	-0.0120272	-0.211149	0.187095	21.4365	-0.119186	0.905261	0.990901	0.129487	-0.15345	0.412423	21.4436	0.910932	0.365102	0.895002	0	0
hilic	pm2.5	lur	1	0	176.992	261.5	0.0817435	-0.120588	0.284074	21.06	0.795503	0.427038	0.940619	0.0795432	-0.167068	0.326154	21.0025	0.636456	0.525288	0.961983	0.199132	-0.16997	0.568234	21.1865	1.07385	0.286157	0.895002	0	0
hilic	pm2.5	lur	1	0	253.143	145.88	-0.0827241	-0.287596	0.122148	19.9367	-0.795061	0.427295	0.940619	0.0422376	-0.206067	0.290542	19.9263	0.335655	0.737522	0.981794	-0.431709	-0.811394	-0.0520236	19.9596	-2.26317	0.0263693	0.855884	0	0
hilic	pm2.5	lur	1	0	352.12	102.708	0.0786294	-0.116232	0.27349	20.4149	0.794531	0.427603	0.940619	0.00896142	-0.231589	0.249512	20.4609	0.0735105	0.941482	0.990901	0.278756	-0.0585011	0.616013	20.3134	1.64518	0.103905	0.855884	0	0
hilic	pm2.5	lur	1	0	337.905	82.959	-0.224701	-0.781632	0.332231	19.0138	-0.794426	0.427664	0.940619	-0.263603	-0.889966	0.36276	19.1039	-0.830429	0.407396	0.961983	-0.534484	-1.69286	0.623887	18.8153	-0.918411	0.361199	0.895002	0	0
hilic	pm2.5	lur	1	0	354.932	282.931	0.179864	-0.266444	0.626171	19.2892	0.793525	0.428188	0.940619	0.194316	-0.30427	0.692903	19.3994	0.769037	0.44288	0.961983	0.197497	-0.778678	1.17367	19.0465	0.402701	0.688255	0.944899	0	0
hilic	pm2.5	lur	1	0	377.345	36.043	-0.121679	-0.424169	0.180811	19.7235	-0.792056	0.429042	0.940619	0.00879828	-0.365091	0.382688	19.8618	0.0464336	0.963016	0.993869	-0.390467	-0.913151	0.132216	19.4188	-1.48695	0.141008	0.855884	0	0
hilic	pm2.5	lur	1	0	176.116	106.171	-0.0730965	-0.254891	0.108698	25.0521	-0.791712	0.429242	0.940619	-0.0706798	-0.304097	0.162738	25.1227	-0.597503	0.550922	0.961983	-0.0784856	-0.366517	0.209545	24.8965	-0.542377	0.589086	0.927631	0	0
hilic	pm2.5	lur	1	0	303.232	272.996	0.0681437	-0.101396	0.237684	20.3599	0.791416	0.429414	0.940619	0.073981	-0.118664	0.266626	20.4299	0.757774	0.449577	0.961983	0.0860914	-0.253602	0.425785	20.2056	0.504455	0.615346	0.931593	0	0
hilic	pm2.5	lur	1	0	244.958	135.87	-0.100851	-0.351784	0.150081	21.6989	-0.791362	0.429446	0.940619	-0.170928	-0.49387	0.152014	21.6558	-1.0444	0.2977	0.961983	0.130891	-0.257246	0.519029	21.7937	0.671237	0.504027	0.920114	0	0
hilic	pm2.5	lur	1	0	548.61	68.658	0.0362855	-0.0540429	0.126614	25.4877	0.79097	0.429674	0.940619	-0.0211826	-0.130747	0.0883822	25.4826	-0.381492	0.703288	0.970577	0.151143	-0.0268442	0.329131	25.4989	1.69024	0.094923	0.855884	0	0
hilic	pm2.5	lur	1	0	220.009	67.123	-0.0363109	-0.126707	0.0540853	23.7832	-0.790929	0.429698	0.940619	-0.0155276	-0.128925	0.0978697	23.8182	-0.270197	0.787318	0.986872	-0.0706577	-0.237397	0.0960819	23.7061	-0.843472	0.401511	0.901942	0	0
hilic	pm2.5	lur	1	0	199.082	100.809	0.0889034	-0.132635	0.310442	19.8338	0.790169	0.430141	0.940619	0.10683	-0.163276	0.376937	19.8676	0.780436	0.436159	0.961983	0.0750552	-0.337596	0.487706	19.7594	0.362033	0.718294	0.9517	0	0
hilic	pm2.5	lur	1	0	265.252	31.371	-0.0881363	-0.307974	0.131701	20.4558	-0.789413	0.430582	0.940619	-0.0171566	-0.268313	0.234	20.444	-0.134793	0.892927	0.990901	-0.185136	-0.648372	0.2781	20.4818	-0.795497	0.428708	0.905711	0	0
hilic	pm2.5	lur	1	0	167.057	102.165	-0.13375	-0.467648	0.200147	20.1223	-0.788738	0.430976	0.940619	-0.145397	-0.564147	0.273353	20.2242	-0.68514	0.494137	0.961983	-0.113885	-0.697552	0.469782	19.8977	-0.388376	0.698782	0.945635	0	0
hilic	pm2.5	lur	1	0	270.997	89.027	-0.108963	-0.381175	0.163249	22.5413	-0.788174	0.431304	0.940619	-0.158424	-0.505661	0.188813	22.5012	-0.900269	0.36918	0.961983	-0.0285536	-0.468321	0.411214	22.6296	-0.129237	0.897498	0.992091	0	0
hilic	pm2.5	lur	1	0	297.663	52.328	0.243309	-0.365318	0.851936	18.4492	0.78715	0.431903	0.940619	-0.0659285	-0.844268	0.712411	18.2778	-0.167141	0.867447	0.989597	1.13329	0.16533	2.10125	18.8267	2.33042	0.0223364	0.855884	0	0
hilic	pm2.5	lur	1	0	295.226	276.457	-0.189491	-0.663891	0.284909	19.4501	-0.786493	0.432287	0.940619	0.0258919	-0.552843	0.604627	19.3108	0.0882801	0.929752	0.990901	-0.64265	-1.51348	0.228179	19.757	-1.4689	0.145831	0.855884	0	0
hilic	pm2.5	lur	1	0	426.086	115.216	0.194169	-0.292621	0.680958	16.912	0.785396	0.432928	0.940619	0.120449	-0.475424	0.716321	16.9327	0.398866	0.690465	0.970577	0.337189	-0.563688	1.23807	16.8664	0.745003	0.45848	0.911684	0	0
hilic	pm2.5	lur	1	0	184.986	287.329	0.0828215	-0.124847	0.29049	24.3792	0.785278	0.432997	0.940619	0.182962	-0.0295954	0.395519	24.3589	1.69849	0.0911434	0.883312	-0.254529	-0.751052	0.241994	24.4242	-1.02035	0.310678	0.895002	0	0
hilic	pm2.5	lur	1	0	382.28	31.042	0.187429	-0.282938	0.657797	16.9873	0.784605	0.433391	0.940619	0.0653335	-0.543791	0.674458	16.652	0.211645	0.832623	0.988245	0.47546	-0.206465	1.15739	17.7259	1.3878	0.169099	0.855884	0	0
hilic	pm2.5	lur	1	0	336.011	68.706	-0.223526	-0.784487	0.337436	17.9534	-0.784594	0.433398	0.940619	-0.21138	-0.831291	0.408531	17.7856	-0.672841	0.501911	0.961983	-0.0803831	-1.27438	1.11362	18.3229	-0.134002	0.893742	0.992091	0	0
hilic	pm2.5	lur	1	0	570.875	81.577	-0.20206	-0.70949	0.305371	17.4932	-0.784068	0.433705	0.940619	-0.121747	-0.726589	0.483096	17.4802	-0.397185	0.691701	0.970577	-0.410644	-1.39303	0.571744	17.5218	-0.832017	0.407907	0.904707	0	0
hilic	pm2.5	lur	1	0	228.986	135.149	0.202691	-0.306634	0.712016	17.0694	0.783594	0.433983	0.940619	0.357751	-0.223681	0.939182	17.1526	1.21412	0.226294	0.961983	-0.1337	-1.20115	0.933753	16.8861	-0.249306	0.803771	0.9738	0	0
hilic	pm2.5	lur	1	0	344.279	39.973	0.0791753	-0.119914	0.278264	24.9407	0.783057	0.434298	0.940619	-0.105449	-0.346214	0.135317	24.9139	-0.864222	0.388616	0.961983	0.488216	0.126553	0.849879	24.9999	2.68694	0.0087882	0.855884	0	0
hilic	pm2.5	lur	1	0	119.957	268.596	0.0930861	-0.141143	0.327316	19.6716	0.782518	0.434614	0.940619	0.0553738	-0.209361	0.320109	19.7172	0.412734	0.680292	0.970577	0.19032	-0.314091	0.69473	19.5711	0.751017	0.454873	0.910009	0	0
hilic	pm2.5	lur	1	0	422.882	79.866	0.0340001	-0.0516966	0.119697	24.7656	0.78121	0.435382	0.940619	0.0408833	-0.0649997	0.146766	24.7814	0.7619	0.447117	0.961983	0.0323178	-0.132897	0.197533	24.7309	0.389353	0.698062	0.945635	0	0
hilic	pm2.5	lur	1	0	446.831	65.892	-0.100987	-0.355539	0.153564	22.1126	-0.781166	0.435407	0.940619	-0.197804	-0.51767	0.122063	22.0386	-1.22024	0.223972	0.961983	0.124109	-0.308558	0.556777	22.2756	0.570953	0.569652	0.925344	0	0
hilic	pm2.5	lur	1	0	1247.26	85.624	0.144652	-0.220155	0.50946	20.6069	0.780752	0.435651	0.940619	0.320048	-0.111447	0.751542	20.676	1.46358	0.145052	0.916187	-0.198245	-0.924888	0.528399	20.4548	-0.543038	0.588632	0.927631	0	0
hilic	pm2.5	lur	1	0	386.326	37.884	-0.230498	-0.812697	0.351701	19.023	-0.779556	0.436353	0.940619	0.0340341	-0.673528	0.741596	19.3424	0.0949133	0.924489	0.990901	-0.715726	-1.78514	0.353691	18.3196	-1.33214	0.186644	0.855884	0	0
hilic	pm2.5	lur	1	0	372.259	40.919	-0.149255	-0.527701	0.229191	20.7672	-0.77656	0.438116	0.940619	0.123048	-0.286211	0.532307	21.003	0.593272	0.553744	0.961983	-0.690946	-1.52819	0.146297	20.2479	-1.64264	0.104431	0.855884	0	0
hilic	pm2.5	lur	1	0	86.101	59.475	0.252761	-0.388545	0.894067	18.8395	0.776061	0.43841	0.940619	-0.131551	-0.893458	0.630355	18.9702	-0.3407	0.733727	0.981794	1.21512	-0.0121867	2.44242	18.5517	1.97068	0.0522627	0.855884	0	0
hilic	pm2.5	lur	1	0	169.009	277.928	0.0499142	-0.0769071	0.176735	21.1764	0.774966	0.439056	0.940619	0.0571389	-0.0834204	0.197698	21.1922	0.802141	0.423529	0.961983	-0.031775	-0.316148	0.252598	21.1417	-0.222407	0.824571	0.980706	0	0
hilic	pm2.5	lur	1	0	163.054	72.991	-0.0584347	-0.206909	0.0900395	22.2214	-0.774945	0.439068	0.940619	-0.0805856	-0.244953	0.0837815	22.246	-0.967432	0.334626	0.961983	-0.0051087	-0.338107	0.32789	22.1672	-0.0305364	0.975716	0.998705	0	0
hilic	pm2.5	lur	1	0	372.318	28.103	0.186929	-0.288993	0.662851	17.0849	0.773378	0.439993	0.940619	0.0872515	-0.509618	0.684121	17.2184	0.288451	0.773334	0.986872	0.482213	-0.314773	1.2792	16.791	1.20431	0.232065	0.866972	0	0
hilic	pm2.5	lur	1	0	142.073	74.066	0.0442642	-0.0684626	0.156991	22.6184	0.773172	0.440115	0.940619	0.0627401	-0.0717066	0.197187	22.594	0.920817	0.358379	0.961983	-0.0139347	-0.239053	0.211184	22.6722	-0.123207	0.902256	0.992091	0	0
hilic	pm2.5	lur	1	0	209.987	153.466	0.117622	-0.182033	0.417277	20.1574	0.77289	0.440281	0.940619	0.111019	-0.277332	0.499369	20.0725	0.564092	0.573394	0.963422	0.171655	-0.294722	0.638032	20.3443	0.732605	0.465967	0.913105	0	0
hilic	pm2.5	lur	1	0	515.38	38.238	-0.176147	-0.625158	0.272864	17.7685	-0.772448	0.440543	0.940619	-0.196861	-0.837292	0.44357	17.4078	-0.606549	0.544915	0.961983	-0.0126491	-0.317623	0.292325	18.563	-0.0825555	0.934414	0.992091	0	0
hilic	pm2.5	lur	1	0	528.769	67.135	0.0524461	-0.0812589	0.186151	24.3602	0.772354	0.440598	0.940619	0.131861	-0.0267722	0.290495	24.3531	1.64021	0.102707	0.885563	-0.130697	-0.399395	0.138	24.3757	-0.968173	0.335912	0.895002	0	0
hilic	pm2.5	lur	1	0	536.39	38.094	-0.124801	-0.443052	0.193451	20.028	-0.772143	0.440723	0.940619	-0.0622776	-0.476584	0.352029	19.651	-0.296612	0.767105	0.986872	-0.209556	-0.688251	0.269138	20.8582	-0.871349	0.386203	0.895002	0	0
hilic	pm2.5	lur	1	0	271.981	63.188	0.222548	-0.345145	0.79024	16.3555	0.771901	0.440866	0.940619	0.242308	-0.466645	0.951261	16.2745	0.674417	0.500911	0.961983	0.241379	-0.728767	1.21152	16.5341	0.495236	0.621808	0.93368	0	0
hilic	pm2.5	lur	1	0	256.175	39.676	0.0896164	-0.139049	0.318282	21.5449	0.771681	0.440996	0.940619	0.163241	-0.121653	0.448135	21.6025	1.13064	0.259712	0.961983	-0.155626	-0.55994	0.248689	21.4179	-0.766147	0.445871	0.905711	0	0
hilic	pm2.5	lur	1	0	286.201	44.51	0.0721843	-0.112055	0.256423	27.1212	0.771459	0.441127	0.940619	-0.0442406	-0.266033	0.177552	27.0331	-0.393597	0.694344	0.970577	0.268414	-0.083709	0.620538	27.3153	1.51726	0.133191	0.855884	0	0
hilic	pm2.5	lur	1	0	112.076	237.449	-0.193018	-0.685862	0.299827	19.3163	-0.77115	0.44131	0.940619	-0.401479	-0.958291	0.155332	19.2448	-1.42277	0.156535	0.92383	0.256525	-0.809872	1.32292	19.4737	0.478807	0.633398	0.933936	0	0
hilic	pm2.5	lur	1	0	123.964	251.875	-0.101466	-0.360679	0.157747	18.9666	-0.770751	0.441546	0.940619	0.00184049	-0.293669	0.29735	19.0594	0.0122897	0.990208	0.996575	-0.354665	-0.898396	0.189065	18.762	-1.29833	0.197951	0.855884	0	0
hilic	pm2.5	lur	1	0	117.744	75.934	-0.14412	-0.512584	0.224344	20.6321	-0.77016	0.441896	0.940619	-0.167843	-0.637026	0.301339	20.6032	-0.705896	0.481166	0.961983	0.0175651	-0.596206	0.631337	20.6956	0.0569632	0.954718	0.996502	0	0
hilic	pm2.5	lur	1	0	503.966	87.805	-0.120378	-0.428193	0.187438	20.9514	-0.770028	0.441975	0.940619	-0.146696	-0.529407	0.236015	20.923	-0.756354	0.450426	0.961983	-0.113803	-0.64946	0.421853	21.0139	-0.422882	0.67353	0.943915	0	0
hilic	pm2.5	lur	1	0	463.342	38.168	-0.109901	-0.391183	0.171381	22.1668	-0.769327	0.44239	0.940619	-0.0383824	-0.412526	0.335761	21.7764	-0.202429	0.83981	0.988245	-0.127597	-0.498491	0.243298	23.0265	-0.684762	0.495498	0.920114	0	0
hilic	pm2.5	lur	1	0	230.81	66.652	-0.119355	-0.424989	0.186279	18.5717	-0.768934	0.442622	0.940619	-0.190604	-0.547046	0.165839	18.4851	-1.05516	0.292764	0.961983	0.124451	-0.50115	0.750052	18.7623	0.39596	0.693202	0.944899	0	0
hilic	pm2.5	lur	1	0	207.159	29.57	0.158898	-0.248063	0.565858	18.6811	0.768805	0.442699	0.940619	0.329382	-0.16381	0.822574	18.6548	1.31784	0.189233	0.952101	-0.281583	-1.01268	0.449517	18.7389	-0.766619	0.445592	0.905711	0	0
hilic	pm2.5	lur	1	0	282.279	35.216	-0.086041	-0.306784	0.134702	20.5362	-0.767483	0.443483	0.940619	-0.152321	-0.429469	0.124826	20.445	-1.0845	0.279595	0.961983	-0.0127459	-0.393631	0.36814	20.7369	-0.0666081	0.947062	0.993135	0	0
hilic	pm2.5	lur	1	0	722.486	66.165	0.0360349	-0.0564365	0.128506	24.6243	0.767303	0.44359	0.940619	0.0318176	-0.0816022	0.145237	24.6342	0.553549	0.580574	0.963422	0.0260702	-0.152314	0.204454	24.6024	0.290897	0.771892	0.965845	0	0
hilic	pm2.5	lur	1	0	119.016	74.069	0.0629964	-0.0988037	0.224797	23.9525	0.766634	0.443987	0.940619	0.074992	-0.112018	0.262002	23.9692	0.791278	0.429824	0.961983	0.0645015	-0.270089	0.399093	23.9159	0.383713	0.702222	0.946152	0	0
hilic	pm2.5	lur	1	0	106.114	54.71	-0.0630987	-0.225162	0.0989648	23.0933	-0.76663	0.443989	0.940619	-0.0143196	-0.185419	0.15678	23.1177	-0.165143	0.869016	0.989597	-0.201945	-0.576372	0.172482	23.0394	-1.07353	0.2863	0.895002	0	0
hilic	pm2.5	lur	1	0	355.163	121.603	0.191959	-0.301933	0.685852	17.1007	0.765292	0.444784	0.941147	0.246654	-0.306946	0.800255	17.0819	0.879165	0.380484	0.961983	0.173525	-0.899582	1.24663	17.142	0.321862	0.748407	0.961695	0	0
hilic	pm2.5	lur	1	0	199.001	21.517	0.0532463	-0.0841514	0.190644	20.5606	0.763064	0.446109	0.941147	0.0737769	-0.0956987	0.243252	20.6205	0.858996	0.391485	0.961983	0.00043156	-0.249689	0.250552	20.4284	0.00343429	0.997268	0.999568	0	0
hilic	pm2.5	lur	1	0	101.071	96.528	0.0327582	-0.0518265	0.117343	24.8968	0.762569	0.446404	0.941147	0.0103059	-0.0899255	0.110537	24.901	0.20289	0.83945	0.988245	0.0458018	-0.128652	0.220255	24.8875	0.52258	0.602729	0.92951	0	0
hilic	pm2.5	lur	1	0	360.319	37.278	0.0581488	-0.0922277	0.208525	22.7279	0.761398	0.447101	0.941147	0.00091195	-0.184621	0.186445	22.801	0.00969901	0.992272	0.996575	0.225245	-0.0491891	0.499679	22.5667	1.63368	0.106305	0.855884	0	0
hilic	pm2.5	lur	1	0	1140.22	68.293	-0.164178	-0.589255	0.260899	20.9584	-0.760498	0.447638	0.941147	-0.235441	-0.749879	0.278998	20.9931	-0.90308	0.367691	0.961983	0.225469	-0.56306	1.014	20.8819	0.56914	0.570876	0.925369	0	0
hilic	pm2.5	lur	1	0	110.071	118.534	-0.0579786	-0.208464	0.0925071	28.9467	-0.758618	0.44876	0.941147	-0.0390621	-0.229317	0.151193	29.0487	-0.405133	0.685861	0.970577	-0.110057	-0.370231	0.150116	28.722	-0.84199	0.402335	0.901942	0	0
hilic	pm2.5	lur	1	0	107.086	30.59	-0.0759305	-0.27302	0.121159	20.3396	-0.758583	0.448781	0.941147	-0.0846425	-0.357568	0.188283	20.4605	-0.61196	0.541337	0.961983	-0.151558	-0.358207	0.0550921	20.0733	-1.4598	0.14831	0.855884	0	0
hilic	pm2.5	lur	1	0	512.66	66.593	0.174758	-0.279394	0.62891	21.6204	0.75768	0.449321	0.941147	0.159121	-0.434322	0.752564	21.4546	0.529086	0.597397	0.966918	0.148445	-0.530584	0.827473	21.9856	0.435137	0.664649	0.941473	0	0
hilic	pm2.5	lur	1	0	358.258	42.059	-0.0967328	-0.348288	0.154823	22.6383	-0.757166	0.449628	0.941147	-0.231204	-0.512713	0.0503052	22.6934	-1.62062	0.10685	0.891976	0.189291	-0.34669	0.725272	22.517	0.70296	0.484147	0.920114	0	0
hilic	pm2.5	lur	1	0	202.959	138.129	-0.125609	-0.452649	0.201431	17.9544	-0.756259	0.450171	0.941147	-0.297481	-0.71153	0.116569	17.9248	-1.4177	0.158008	0.92383	0.389919	-0.111954	0.891793	18.0197	1.54643	0.125997	0.855884	0	0
hilic	pm2.5	lur	1	0	218.927	70.76	-0.187293	-0.675118	0.300531	21.6817	-0.755978	0.450339	0.941147	-0.149071	-0.724268	0.426126	21.7645	-0.511393	0.609703	0.967904	-0.154473	-1.11728	0.808335	21.4995	-0.319347	0.750306	0.961695	0	0
hilic	pm2.5	lur	1	0	142.004	137.365	0.0919043	-0.148115	0.331924	17.677	0.753946	0.451556	0.941147	0.0507527	-0.247503	0.349008	17.6412	0.335775	0.737432	0.981794	0.213006	-0.213696	0.639708	17.7558	0.993612	0.323445	0.895002	0	0
hilic	pm2.5	lur	1	0	380.003	88.154	-0.22414	-0.810412	0.362131	20.3051	-0.752788	0.452251	0.941147	0.0331506	-0.642757	0.709058	20.3266	0.0967792	0.923009	0.990901	-0.579897	-1.78057	0.620774	20.2578	-0.96134	0.339314	0.895002	0	0
hilic	pm2.5	lur	1	0	95.044	144.991	0.047096	-0.0761501	0.170342	26.531	0.752423	0.452469	0.941147	0.045069	-0.105335	0.195473	26.5462	0.591285	0.555072	0.961983	0.0540242	-0.182533	0.290582	26.4977	0.454571	0.650664	0.937675	0	0
hilic	pm2.5	lur	1	0	319.882	144.016	-0.16191	-0.585697	0.261876	17.3929	-0.752278	0.452557	0.941147	-0.57924	-1.10537	-0.0531081	17.152	-2.17241	0.0311321	0.883312	0.672305	-0.0235818	1.36819	17.9234	1.92299	0.0580838	0.855884	0	0
hilic	pm2.5	lur	1	0	609.93	86.544	0.0581893	-0.0941748	0.210553	24.459	0.751989	0.45273	0.941147	0.0270635	-0.155231	0.209358	24.4853	0.292947	0.7699	0.986872	0.115072	-0.186646	0.41679	24.401	0.759137	0.45003	0.906204	0	0
hilic	pm2.5	lur	1	0	621.934	36.925	-0.154896	-0.56184	0.252048	16.7125	-0.749473	0.454242	0.941147	-0.163919	-0.738667	0.410828	16.28	-0.56277	0.574292	0.963422	-0.0638532	-0.38249	0.254784	17.6652	-0.398875	0.691061	0.944899	0	0
hilic	pm2.5	lur	1	0	153.033	142.124	0.0572742	-0.093256	0.207804	25.0339	0.749181	0.454418	0.941147	0.0607615	-0.126545	0.248068	25.0417	0.640108	0.522916	0.961983	0.0534534	-0.221072	0.327978	25.0168	0.387564	0.699381	0.945635	0	0
hilic	pm2.5	lur	1	0	578.607	66.476	-0.0794023	-0.288104	0.129299	21.4831	-0.749132	0.454447	0.941147	-0.0927549	-0.370849	0.18534	21.5419	-0.658146	0.511285	0.961983	0.0424046	-0.243161	0.32797	21.3535	0.295568	0.768336	0.965399	0	0
hilic	pm2.5	lur	1	0	234.894	66.783	0.0255323	-0.0416013	0.0926659	24.0571	0.748861	0.45461	0.941147	0.0104118	-0.0753924	0.0962161	24.0611	0.23944	0.811037	0.987696	0.0869642	-0.0245523	0.198481	24.0482	1.55221	0.124607	0.855884	0	0
hilic	pm2.5	lur	1	0	130.017	144.156	0.108652	-0.177373	0.394677	20.4896	0.747973	0.455145	0.941147	0.245934	-0.0798099	0.571679	20.5005	1.48977	0.138034	0.915223	-0.178273	-0.775378	0.418832	20.4655	-0.594272	0.554028	0.920494	0	0
hilic	pm2.5	lur	1	0	176.147	102.589	0.151029	-0.246646	0.548705	20.7696	0.747797	0.455251	0.941147	-0.169416	-0.613294	0.274463	20.8787	-0.753127	0.452358	0.961983	0.9547	0.111943	1.79746	20.5292	2.25483	0.0269116	0.855884	0	0
hilic	pm2.5	lur	1	0	175.034	56.603	-0.0989431	-0.36021	0.162324	22.1398	-0.745678	0.456528	0.941147	-0.0818172	-0.372598	0.208963	22.0978	-0.55521	0.57944	0.963422	-0.169291	-0.73488	0.396297	22.2324	-0.595778	0.553026	0.920494	0	0
hilic	pm2.5	lur	1	0	229.155	68.333	-0.0425374	-0.15488	0.0698056	26.4207	-0.745549	0.456606	0.941147	-0.152148	-0.283183	-0.0211141	26.4517	-2.29119	0.0231113	0.883312	0.230782	0.0142637	0.447301	26.3525	2.12157	0.037008	0.855884	0	0
hilic	pm2.5	lur	1	0	299.138	40.865	-0.190343	-0.693198	0.312512	20.1419	-0.745323	0.456742	0.941147	0.0294153	-0.582438	0.641269	20.4645	0.0948646	0.924528	0.990901	-0.535057	-1.45291	0.382799	19.4315	-1.16031	0.249415	0.88115	0	0
hilic	pm2.5	lur	1	0	219.174	281.553	-0.179056	-0.652287	0.294174	20.2357	-0.74502	0.456925	0.941147	0.0490707	-0.465357	0.563499	20.3848	0.188224	0.850913	0.989597	-0.70977	-1.78601	0.366467	19.9074	-1.31268	0.19309	0.855884	0	0
hilic	pm2.5	lur	1	0	315.003	41.798	0.157891	-0.259798	0.575579	18.0624	0.744312	0.457352	0.941147	0.177774	-0.301509	0.657056	17.8477	0.731904	0.465179	0.961983	0.210387	-0.630832	1.05161	18.5354	0.497805	0.620004	0.93368	0	0
hilic	pm2.5	lur	1	0	797.623	41.35	0.140923	-0.232	0.513847	21.8681	0.744072	0.457497	0.941147	0.511165	0.0863588	0.935972	21.9313	2.37437	0.0186315	0.883312	-0.619018	-1.38039	0.142358	21.7291	-1.61828	0.109587	0.855884	0	0
hilic	pm2.5	lur	1	0	642.6	58.612	0.0235265	-0.0387442	0.0857973	22.9914	0.743917	0.45759	0.941147	-0.0041334	-0.0781564	0.0698896	22.9771	-0.110184	0.912386	0.990901	0.102775	-0.0317232	0.237273	23.023	1.52097	0.132259	0.855884	0	0
hilic	pm2.5	lur	1	0	189.135	95.564	-0.0782344	-0.285349	0.12888	25.4822	-0.743769	0.45768	0.941147	-0.051371	-0.308809	0.206067	25.4053	-0.393753	0.69423	0.970577	-0.166205	-0.537759	0.205349	25.6517	-0.890375	0.375968	0.895002	0	0
hilic	pm2.5	lur	1	0	253.18	24.805	-0.0657617	-0.239915	0.108391	19.541	-0.743521	0.45783	0.941147	-0.0356704	-0.27184	0.200499	19.5968	-0.298032	0.766023	0.986872	-0.120344	-0.347351	0.106662	19.418	-1.05521	0.294547	0.895002	0	0
hilic	pm2.5	lur	1	0	438.684	68.467	0.179866	-0.296864	0.656596	21.4205	0.742895	0.458208	0.941147	0.381236	-0.131508	0.89398	21.3728	1.46714	0.144083	0.916187	-0.0858353	-1.17639	1.00472	21.5256	-0.156664	0.875909	0.984419	0	0
hilic	pm2.5	lur	1	0	205.159	38.669	-0.199147	-0.727416	0.329122	18.2055	-0.742284	0.458578	0.941147	-0.102177	-0.741281	0.536927	18.3135	-0.315471	0.752769	0.984574	-0.288162	-1.27531	0.69899	17.9674	-0.581036	0.56287	0.921491	0	0
hilic	pm2.5	lur	1	0	137.079	69.398	-0.149172	-0.545307	0.246962	21.4843	-0.741475	0.459067	0.941147	-0.067026	-0.524981	0.390929	21.5468	-0.288801	0.773066	0.986872	-0.355828	-1.13123	0.419571	21.3466	-0.913408	0.363807	0.895002	0	0
hilic	pm2.5	lur	1	0	197.056	271.289	-0.0716664	-0.262109	0.118776	20.4602	-0.740974	0.45937	0.941147	-0.0163841	-0.256189	0.223421	20.4622	-0.134816	0.892908	0.990901	-0.110357	-0.437382	0.216667	20.4557	-0.671693	0.503738	0.920114	0	0
hilic	pm2.5	lur	1	0	85.052	96.569	-0.102159	-0.373669	0.16935	19.3709	-0.740874	0.459431	0.941147	-0.194049	-0.530499	0.142402	19.3624	-1.13807	0.256606	0.961983	0.0762295	-0.409718	0.562177	19.3897	0.312237	0.755683	0.964748	0	0
hilic	pm2.5	lur	1	0	211.106	89.184	-0.220271	-0.806011	0.365469	19.083	-0.740463	0.45968	0.941147	-0.379411	-1.09411	0.335288	19.0448	-1.04753	0.296262	0.961983	0.143849	-0.921169	1.20887	19.1673	0.268844	0.78875	0.970036	0	0
hilic	pm2.5	lur	1	0	225.034	75.303	-0.0504247	-0.184644	0.0837943	26.427	-0.739742	0.460116	0.941147	-0.0054626	-0.172436	0.161511	26.4553	-0.0645548	0.9486	0.990987	-0.119265	-0.35943	0.120901	26.3647	-0.988442	0.325954	0.895002	0	0
hilic	pm2.5	lur	1	0	338.341	36.188	-0.114942	-0.421494	0.19161	22.6915	-0.73829	0.460996	0.941147	-0.17772	-0.555326	0.199887	22.7428	-0.928697	0.35429	0.961983	-0.0030136	-0.557555	0.551527	22.5787	-0.0108169	0.991397	0.999568	0	0
hilic	pm2.5	lur	1	0	211.144	270.712	0.0569769	-0.0950138	0.208968	20.2513	0.73813	0.461093	0.941147	0.133779	-0.053512	0.32107	20.2697	1.40945	0.160428	0.92383	-0.19888	-0.46858	0.0708208	20.2108	-1.46777	0.146136	0.855884	0	0
hilic	pm2.5	lur	1	0	588.636	66.144	0.188602	-0.314658	0.691862	17.6593	0.737912	0.461226	0.941147	-0.0631065	-0.650166	0.523954	17.6538	-0.212114	0.832258	0.988245	0.745573	-0.277453	1.7686	17.6716	1.45062	0.150844	0.855884	0	0
hilic	pm2.5	lur	1	0	197.117	24.152	-0.0632487	-0.23224	0.105743	20.0848	-0.736948	0.461811	0.941147	-0.0303952	-0.240214	0.179423	20.1159	-0.28585	0.775322	0.986872	-0.175816	-0.48192	0.130288	20.0164	-1.14324	0.25639	0.883262	0	0
hilic	pm2.5	lur	1	0	114.044	51.556	-0.0382969	-0.140678	0.0640844	24.3249	-0.736536	0.462061	0.941147	-0.0825876	-0.205436	0.0402612	24.3584	-1.32655	0.18634	0.952101	0.0745458	-0.125506	0.274597	24.2512	0.741706	0.460464	0.911684	0	0
hilic	pm2.5	lur	1	0	90.507	272.075	0.0436865	-0.0731494	0.160522	24.5529	0.736245	0.462238	0.941147	-0.0397556	-0.184793	0.105282	24.5562	-0.540874	0.589263	0.964792	0.157405	-0.0432244	0.358035	24.5456	1.56162	0.122375	0.855884	0	0
hilic	pm2.5	lur	1	0	193.159	26.68	0.0553812	-0.0927397	0.203502	19.5641	0.736201	0.462264	0.941147	0.0491991	-0.143406	0.241804	19.5061	0.504044	0.614847	0.967904	0.106143	-0.128669	0.340955	19.6917	0.899749	0.370988	0.895002	0	0
hilic	pm2.5	lur	1	0	312.004	89.758	-0.153352	-0.56393	0.257226	17.9401	-0.735435	0.46273	0.941147	-0.0330374	-0.508565	0.44249	17.9184	-0.137091	0.891112	0.990901	-0.461855	-1.28677	0.363063	17.9878	-1.11441	0.268481	0.887495	0	0
hilic	pm2.5	lur	1	0	140.002	294.675	-0.0756506	-0.278238	0.126937	22.2767	-0.735277	0.462826	0.941147	-0.0072181	-0.21108	0.196644	22.3302	-0.0698657	0.944378	0.990901	-0.20057	-0.704578	0.303438	22.159	-0.792098	0.430675	0.905711	0	0
hilic	pm2.5	lur	1	0	201.008	292.783	-0.116799	-0.429976	0.196377	19.5184	-0.734349	0.46339	0.941147	-0.200209	-0.584087	0.183669	19.5276	-1.02913	0.304801	0.961983	0.082772	-0.496151	0.661695	19.4982	0.284586	0.776706	0.965845	0	0
hilic	pm2.5	lur	1	0	1047.73	48.709	0.131233	-0.22075	0.483215	22.4203	0.734129	0.463524	0.941147	0.319102	-0.128449	0.766653	22.5737	1.40691	0.161179	0.92383	-0.126317	-0.690099	0.437465	22.0823	-0.445966	0.656842	0.939554	0	0
hilic	pm2.5	lur	1	0	181.008	77.861	0.0620812	-0.104434	0.228596	22.9669	0.734105	0.463539	0.941147	-0.025711	-0.215794	0.164372	22.9136	-0.266903	0.789849	0.986872	0.248893	-0.0831641	0.58095	23.0841	1.49194	0.139698	0.855884	0	0
hilic	pm2.5	lur	1	0	225.148	151.71	-0.0739475	-0.272304	0.124409	20.3146	-0.734055	0.463569	0.941147	-0.0368647	-0.274266	0.200537	20.3271	-0.306411	0.759646	0.984574	-0.164051	-0.553307	0.225204	20.287	-0.83887	0.404073	0.903262	0	0
hilic	pm2.5	lur	1	0	434.1	120.728	0.162237	-0.272982	0.597456	17.1696	0.733997	0.463604	0.941147	0.208192	-0.291377	0.707762	17.1789	0.822331	0.411976	0.961983	0.165275	-0.743744	1.07429	17.1492	0.361896	0.718396	0.9517	0	0
hilic	pm2.5	lur	1	0	154.033	103.049	0.219025	-0.368917	0.806966	17.4084	0.733517	0.463896	0.941147	0.33104	-0.429272	1.09135	17.3099	0.859146	0.391403	0.961983	0.00900183	-0.911746	0.92975	17.6254	0.0194599	0.984523	0.999158	0	0
hilic	pm2.5	lur	1	0	156.077	113.891	0.106789	-0.179873	0.393451	31.2232	0.733513	0.463899	0.941147	0.179529	-0.198383	0.557441	31.3034	0.937396	0.349811	0.961983	-0.0686138	-0.492353	0.355126	31.0466	-0.322302	0.748075	0.961695	0	0
hilic	pm2.5	lur	1	0	105.11	54.348	-0.0413881	-0.152574	0.0697979	28.5957	-0.732954	0.464239	0.941147	-0.0195792	-0.138267	0.0991082	28.6664	-0.325514	0.74517	0.982258	-0.0762481	-0.327542	0.175046	28.4399	-0.603945	0.54761	0.920494	0	0
hilic	pm2.5	lur	1	0	293.021	90.496	-0.128195	-0.472606	0.216217	20.4172	-0.732896	0.464274	0.941147	-0.0614987	-0.510676	0.387679	20.3132	-0.270163	0.787345	0.986872	-0.335544	-0.862827	0.191739	20.6463	-1.26665	0.209002	0.855884	0	0
hilic	pm2.5	lur	1	0	149.056	132.876	-0.139661	-0.515063	0.23574	20.9694	-0.732541	0.464491	0.941147	-0.225714	-0.654751	0.203322	21.1747	-1.03811	0.300612	0.961983	0.302813	-0.445541	1.05117	20.5171	0.805411	0.423	0.905711	0	0
hilic	pm2.5	lur	1	0	824.508	66.893	-0.175443	-0.647918	0.297032	16.5866	-0.731154	0.465336	0.941147	-0.130471	-0.676379	0.415437	16.6577	-0.471598	0.637785	0.970577	-0.294722	-1.2841	0.694654	16.43	-0.592928	0.554923	0.920494	0	0
hilic	pm2.5	lur	1	0	121.072	47.837	-0.080757	-0.298303	0.136789	24.6673	-0.730938	0.465468	0.941147	-0.251689	-0.503703	0.00032493	24.6733	-1.97069	0.050293	0.883312	0.333019	-0.108679	0.774717	24.6541	1.5007	0.137419	0.855884	0	0
hilic	pm2.5	lur	1	0	579.787	67.391	-0.151062	-0.558671	0.256546	20.0606	-0.729733	0.466203	0.941147	-0.158918	-0.622568	0.304732	20.1981	-0.676334	0.499697	0.961983	-0.003765	-0.872807	0.865276	19.7578	-0.0086234	0.993141	0.999568	0	0
hilic	pm2.5	lur	1	0	524.708	37.623	0.273063	-0.463938	1.01006	17.1136	0.729534	0.466324	0.941147	0.357098	-0.692079	1.40627	16.3961	0.671609	0.502694	0.961983	0.0995049	-0.431808	0.630818	18.6938	0.372773	0.710316	0.948018	0	0
hilic	pm2.5	lur	1	0	329.03	87.116	0.0627319	-0.106611	0.232074	22.2204	0.729413	0.466398	0.941147	0.0879062	-0.12559	0.301402	22.209	0.812471	0.417595	0.961983	0.00256846	-0.293845	0.298982	22.2453	0.0172474	0.986283	0.999158	0	0
hilic	pm2.5	lur	1	0	451.757	67.739	0.168484	-0.286803	0.623771	18.6006	0.72866	0.466858	0.941147	0.156072	-0.366669	0.678813	18.4944	0.589137	0.556508	0.961983	0.154443	-0.806348	1.11523	18.8344	0.319955	0.749847	0.961695	0	0
hilic	pm2.5	lur	1	0	226.097	273.448	-0.0613579	-0.227506	0.104791	20.2488	-0.727152	0.467779	0.941147	0.0137363	-0.179667	0.207139	20.262	0.140148	0.8887	0.990901	-0.171863	-0.508966	0.16524	20.2199	-1.01478	0.31331	0.895002	0	0
hilic	pm2.5	lur	1	0	271.227	289.737	-0.199201	-0.738666	0.340265	20.0833	-0.727074	0.467827	0.941147	-0.0004464	-0.61774	0.616847	19.978	-0.001427	0.998863	0.999321	-0.969059	-2.08028	0.142165	20.3151	-1.7358	0.086498	0.855884	0	0
hilic	pm2.5	lur	1	0	110.093	115.835	-0.141	-0.523067	0.241067	18.1267	-0.72666	0.468081	0.941147	-0.0579443	-0.539034	0.423146	18.1963	-0.237663	0.812413	0.987696	-0.269284	-0.920739	0.38217	17.9735	-0.822769	0.413116	0.905711	0	0
hilic	pm2.5	lur	1	0	257.949	106.73	-0.160986	-0.597213	0.275241	17.9374	-0.726653	0.468085	0.941147	-0.134256	-0.683672	0.415161	17.8117	-0.48218	0.630264	0.970577	-0.310647	-1.05736	0.436068	18.2144	-0.828062	0.41013	0.905711	0	0
hilic	pm2.5	lur	1	0	92.503	145.302	0.115614	-0.198261	0.429489	18.8621	0.72528	0.468925	0.941147	0.136132	-0.22643	0.498694	18.8441	0.740893	0.459724	0.961983	0.213439	-0.424907	0.851785	18.9016	0.66553	0.50765	0.920114	0	0
hilic	pm2.5	lur	1	0	604.699	65.28	0.116204	-0.199832	0.43224	20.5298	0.723996	0.469712	0.941147	0.0149736	-0.355254	0.385201	20.4968	0.0798059	0.93648	0.990901	0.424415	-0.202206	1.05104	20.6024	1.34814	0.181465	0.855884	0	0
hilic	pm2.5	lur	1	0	1044.27	67.418	0.21305	-0.366661	0.792761	17.1908	0.723638	0.469931	0.941147	0.0561303	-0.62861	0.74087	17.1894	0.161752	0.871683	0.989597	0.90085	-0.128264	1.92996	17.194	1.74237	0.0853354	0.855884	0	0
hilic	pm2.5	lur	1	0	288.119	128.322	0.11445	-0.197238	0.426137	19.9523	0.723014	0.470313	0.941147	0.01752	-0.370038	0.405078	19.9943	0.0892022	0.92902	0.990901	0.379052	-0.1817	0.939804	19.8598	1.34548	0.182318	0.855884	0	0
hilic	pm2.5	lur	1	0	395.162	100.444	-0.197201	-0.73516	0.340759	17.5815	-0.721789	0.471066	0.941147	-0.604012	-1.26657	0.0585474	17.6641	-1.79887	0.0737153	0.883312	0.662583	-0.280221	1.60539	17.3994	1.39884	0.165773	0.855884	0	0
hilic	pm2.5	lur	1	0	129.066	86.264	-0.0635902	-0.237175	0.109994	27.1127	-0.721324	0.471351	0.941147	-0.0705549	-0.266166	0.125056	27.1924	-0.711725	0.477557	0.961983	-0.0177721	-0.381357	0.345813	26.9373	-0.0972936	0.92274	0.992091	0	0
hilic	pm2.5	lur	1	0	267.18	31.751	-0.150726	-0.562203	0.260751	19.0299	-0.721262	0.471389	0.941147	-0.0505686	-0.559537	0.4584	19.1017	-0.19605	0.844792	0.989597	-0.346627	-1.06834	0.375085	18.8716	-0.955979	0.341999	0.895002	0	0
hilic	pm2.5	lur	1	0	259.033	260.945	-0.250474	-0.935348	0.434401	17.0707	-0.720115	0.472094	0.941147	-0.0373662	-0.808937	0.734204	16.9866	-0.0955613	0.923975	0.990901	-0.743559	-2.20022	0.7131	17.2557	-1.01603	0.312715	0.895002	0	0
hilic	pm2.5	lur	1	0	185.032	124.509	0.045984	-0.0797563	0.171724	21.9972	0.720084	0.472113	0.941147	0.0548755	-0.0939975	0.203748	22.0123	0.727345	0.467959	0.961983	0.0414851	-0.213149	0.296119	21.9639	0.324285	0.746579	0.961695	0	0
hilic	pm2.5	lur	1	0	198.862	74.033	0.0231198	-0.0401217	0.0863612	28.559	0.719835	0.472266	0.941147	0.0108209	-0.0674413	0.0890831	28.5586	0.272828	0.785298	0.986872	0.0499901	-0.0786132	0.178593	28.5597	0.773716	0.441407	0.905711	0	0
hilic	pm2.5	lur	1	0	279.216	38.318	-0.229779	-0.859051	0.399492	17.4402	-0.718992	0.472784	0.941147	0.0322024	-0.663651	0.728056	17.8959	0.0913163	0.927343	0.990901	-0.701939	-2.03876	0.634886	16.4366	-1.04514	0.299144	0.895002	0	0
hilic	pm2.5	lur	1	0	104.1	54.12	-0.0934537	-0.34954	0.162633	24.1231	-0.718555	0.473053	0.941147	0.0578395	-0.242123	0.357802	24.3764	0.380483	0.704035	0.970577	-0.390561	-0.883683	0.102561	23.5652	-1.57647	0.118914	0.855884	0	0
hilic	pm2.5	lur	1	0	790.69	78.457	-0.140216	-0.524445	0.244014	18.2235	-0.718549	0.473056	0.941147	-0.0959188	-0.533655	0.341818	18.2805	-0.432383	0.665981	0.970577	-0.110877	-0.848732	0.626978	18.0978	-0.299104	0.765646	0.965399	0	0
hilic	pm2.5	lur	1	0	285.169	26.533	-0.11575	-0.433211	0.201711	17.2075	-0.717928	0.473439	0.941147	-0.0263328	-0.41937	0.366705	17.1669	-0.132203	0.894971	0.990901	-0.405912	-0.971872	0.160048	17.2967	-1.42757	0.157357	0.855884	0	0
hilic	pm2.5	lur	1	0	1052.3	67.371	0.199001	-0.34683	0.744832	19.2719	0.717873	0.473473	0.941147	-0.0784831	-0.767535	0.610568	19.21	-0.224751	0.822428	0.988245	0.695563	-0.183661	1.57479	19.4083	1.57466	0.11933	0.855884	0	0
hilic	pm2.5	lur	1	0	578.485	36.361	-0.203337	-0.761337	0.354663	19.0159	-0.717519	0.47369	0.941147	0.112743	-0.576878	0.802365	18.9732	0.322596	0.747376	0.982281	-0.901141	-1.86819	0.0659057	19.1097	-1.85479	0.0673562	0.855884	0	0
hilic	pm2.5	lur	1	0	132.003	73.245	-0.0492952	-0.184579	0.0859885	24.0558	-0.71748	0.473715	0.941147	0.0372693	-0.128203	0.202741	24.0017	0.444431	0.657265	0.970577	-0.279067	-0.528413	-0.0297199	24.1749	-2.22769	0.0287457	0.855884	0	0
hilic	pm2.5	lur	1	0	182.081	72.16	-0.0389657	-0.145999	0.0680672	28.435	-0.716831	0.474115	0.941147	-0.001737	-0.127715	0.124241	28.4885	-0.0272075	0.978324	0.996575	-0.127943	-0.347339	0.0914534	28.3171	-1.16075	0.24924	0.88115	0	0
hilic	pm2.5	lur	1	0	537.894	37.009	0.232568	-0.407263	0.872399	15.9382	0.715709	0.474806	0.941147	0.197868	-0.581711	0.977448	15.5659	0.500834	0.6171	0.968534	0.594985	-0.57104	1.76101	16.7581	1.01566	0.312891	0.895002	0	0
hilic	pm2.5	lur	1	0	226.105	57.582	-0.103103	-0.386877	0.180672	22.9244	-0.715398	0.474998	0.941147	-0.233344	-0.603025	0.136337	22.8108	-1.24551	0.214563	0.961983	0.149146	-0.27655	0.574842	23.1745	0.69737	0.487618	0.920114	0	0
hilic	pm2.5	lur	1	0	322.011	233.412	0.151646	-0.265894	0.569186	21.2648	0.715128	0.475164	0.941147	0.128973	-0.354555	0.612501	21.2323	0.526327	0.599309	0.966986	0.292916	-0.521953	1.10778	21.3365	0.715493	0.476414	0.919047	0	0
hilic	pm2.5	lur	1	0	99.08	283.743	0.179603	-0.31507	0.674277	19.623	0.714901	0.475304	0.941147	-0.0954992	-0.665413	0.474414	19.759	-0.33065	0.741293	0.982115	0.826461	-0.202303	1.85522	19.3234	1.59903	0.113805	0.855884	0	0
hilic	pm2.5	lur	1	0	274.201	33.164	-0.0999396	-0.375794	0.175915	20.1327	-0.713359	0.476256	0.941147	-0.175422	-0.472575	0.121731	20.1277	-1.16488	0.245607	0.961983	-0.0060283	-0.619064	0.607007	20.1438	-0.0195729	0.984433	0.999158	0	0
hilic	pm2.5	lur	1	0	295.212	148.144	0.0928079	-0.163798	0.349413	20.3662	0.712147	0.477005	0.941147	0.160488	-0.144056	0.465032	20.3368	1.03985	0.299804	0.961983	-0.0010579	-0.507179	0.505063	20.4309	-0.0041605	0.996691	0.999568	0	0
hilic	pm2.5	lur	1	0	270.958	71.886	-0.0553207	-0.208346	0.0977048	26.1225	-0.711828	0.477202	0.941147	-0.076179	-0.263045	0.110687	26.1191	-0.804419	0.422216	0.961983	-0.0420462	-0.32826	0.244167	26.13	-0.292406	0.770743	0.965845	0	0
hilic	pm2.5	lur	1	0	298.222	37.36	-0.136332	-0.513881	0.241216	19.4737	-0.711013	0.477706	0.941147	-0.0899201	-0.507513	0.327673	19.6836	-0.424895	0.67142	0.970577	-0.327522	-1.14176	0.486715	19.0114	-0.800644	0.425738	0.905711	0	0
hilic	pm2.5	lur	1	0	151.95	279.528	0.106535	-0.188602	0.401671	19.7037	0.710752	0.477868	0.941147	0.228376	-0.132856	0.589607	19.6993	1.2475	0.213833	0.961983	-0.167956	-0.712326	0.376414	19.7134	-0.614118	0.540902	0.920494	0	0
hilic	pm2.5	lur	1	0	386.874	70.559	-0.236267	-0.892075	0.419541	19.5648	-0.709377	0.478719	0.941147	-0.110439	-0.865062	0.644185	19.6541	-0.288781	0.773081	0.986872	-0.494921	-1.78563	0.795791	19.3683	-0.763233	0.447598	0.905711	0	0
hilic	pm2.5	lur	1	0	121.966	173.384	-0.109353	-0.412898	0.194191	19.1784	-0.70935	0.478735	0.941147	-0.0419447	-0.39432	0.31043	19.3055	-0.234882	0.814567	0.988245	-0.328812	-0.947801	0.290177	18.8986	-1.05734	0.293578	0.895002	0	0
hilic	pm2.5	lur	1	0	117.955	273.521	0.0701449	-0.124979	0.265268	21.8541	0.707844	0.479669	0.941147	0.234032	0.00629083	0.461774	21.8621	2.02774	0.0440615	0.883312	-0.192748	-0.566717	0.181221	21.8366	-1.0259	0.30807	0.895002	0	0
hilic	pm2.5	lur	1	0	572.92	38.089	-0.0968172	-0.36641	0.172776	18.7013	-0.707122	0.480117	0.941147	-0.0772338	-0.445902	0.291434	18.3093	-0.413381	0.67982	0.970577	-0.0809169	-0.39311	0.231277	19.5646	-0.5159	0.607365	0.92951	0	0
hilic	pm2.5	lur	1	0	127.087	29.86	-0.0676867	-0.256178	0.120804	18.5405	-0.707072	0.480148	0.941147	0.01039	-0.210451	0.231231	18.6022	0.092836	0.926137	0.990901	-0.247674	-0.620001	0.124653	18.4046	-1.32406	0.189302	0.855884	0	0
hilic	pm2.5	lur	1	0	153.102	33.136	-0.122814	-0.465024	0.219395	19.0239	-0.706656	0.480406	0.941147	0.139217	-0.287218	0.565652	19.0545	0.644194	0.52027	0.961983	-0.834023	-1.40845	-0.259599	18.9566	-2.88999	0.00497154	0.855884	0	0
hilic	pm2.5	lur	1	0	199.001	273.208	-0.0745237	-0.282241	0.133193	20.372	-0.706437	0.480542	0.941147	-0.188847	-0.421221	0.0435276	20.4749	-1.60361	0.110553	0.891976	0.0932718	-0.352093	0.538637	20.1455	0.416855	0.677915	0.944244	0	0
hilic	pm2.5	lur	1	0	312.238	37.595	-0.141358	-0.535421	0.252705	20.3401	-0.706328	0.480609	0.941147	-0.037051	-0.491862	0.41776	20.2468	-0.160749	0.872472	0.989597	-0.312212	-1.1289	0.504478	20.5456	-0.760927	0.448965	0.906204	0	0
hilic	pm2.5	lur	1	0	348.006	147.845	0.141463	-0.253802	0.536729	17.9236	0.704703	0.481619	0.941147	0.248946	-0.19758	0.695472	18.0462	1.10011	0.272754	0.961983	-0.0076915	-0.852226	0.836844	17.6536	-0.0181278	0.985583	0.999158	0	0
hilic	pm2.5	lur	1	0	131.111	109.554	0.17439	-0.313046	0.661827	15.9294	0.704458	0.481771	0.941147	0.348381	-0.254445	0.951208	15.7821	1.14036	0.255653	0.961983	-0.181963	-1.06135	0.697426	16.2539	-0.411863	0.681555	0.944899	0	0
hilic	pm2.5	lur	1	0	1040.28	67.74	-0.206952	-0.786378	0.372473	17.3565	-0.703273	0.482508	0.941147	-0.420988	-1.1023	0.26032	17.2017	-1.21928	0.224332	0.961983	0.24549	-0.873929	1.36491	17.6975	0.436506	0.66366	0.941473	0	0
hilic	pm2.5	lur	1	0	485.356	38.047	-0.122655	-0.466346	0.221036	20.6364	-0.702697	0.482866	0.941147	-0.0710898	-0.522522	0.380342	20.1256	-0.310737	0.75636	0.984574	-0.0864521	-0.565334	0.39243	21.7616	-0.359333	0.720304	0.952921	0	0
hilic	pm2.5	lur	1	0	243.006	86.529	-0.201469	-0.76643	0.363492	17.249	-0.702167	0.483196	0.941147	0.13408	-0.520189	0.788349	17.0759	0.404376	0.686417	0.970577	-0.89267	-2.03039	0.245051	17.6302	-1.56173	0.122349	0.855884	0	0
hilic	pm2.5	lur	1	0	487.971	83.273	-0.139915	-0.532279	0.252448	20.283	-0.702148	0.483208	0.941147	-0.112366	-0.582456	0.357724	20.3502	-0.471662	0.637739	0.970577	-0.340179	-1.09561	0.415252	20.135	-0.896321	0.372804	0.895002	0	0
hilic	pm2.5	lur	1	0	510.392	48.729	-0.260786	-0.992191	0.470619	17.7674	-0.702065	0.483259	0.941147	-0.283198	-1.19939	0.632992	17.8954	-0.609934	0.542675	0.961983	-0.23924	-1.50128	1.0228	17.4855	-0.37732	0.706947	0.947714	0	0
hilic	pm2.5	lur	1	0	255.978	86.528	0.0470795	-0.0851729	0.179332	24.6822	0.700937	0.483962	0.941147	0.0208205	-0.147016	0.188657	24.6662	0.244785	0.806902	0.987223	0.146251	-0.0797614	0.372264	24.7173	1.288	0.201504	0.855884	0	0
hilic	pm2.5	lur	1	0	245.034	231.934	0.0775019	-0.140369	0.295373	23.758	0.700429	0.484279	0.941147	0.106921	-0.151632	0.365474	23.7668	0.816002	0.415577	0.961983	0.0259446	-0.410073	0.461963	23.7387	0.118439	0.906021	0.992091	0	0
hilic	pm2.5	lur	1	0	158.04	76.349	0.0587476	-0.106676	0.224172	22.0751	0.699267	0.485003	0.941147	0.00141543	-0.207996	0.210827	22.0289	0.0133373	0.989373	0.996575	0.0774546	-0.188414	0.343323	22.1769	0.579871	0.563652	0.92166	0	0
hilic	pm2.5	lur	1	0	121.007	89.054	0.0905948	-0.16466	0.34585	20.077	0.698844	0.485267	0.941147	-0.0173173	-0.315802	0.281168	20.0449	-0.114482	0.908984	0.990901	0.225096	-0.284558	0.734751	20.1477	0.87911	0.382008	0.895002	0	0
hilic	pm2.5	lur	1	0	403.034	102.504	-0.150596	-0.575464	0.274272	17.6521	-0.697928	0.485839	0.941147	-0.0613055	-0.542281	0.41967	17.7575	-0.251509	0.801707	0.986872	-0.345585	-1.2329	0.541729	17.42	-0.775225	0.440521	0.905711	0	0
hilic	pm2.5	lur	1	0	116.098	28.01	0.102313	-0.186525	0.391152	16.1536	0.697474	0.486122	0.941147	0.127957	-0.233669	0.489582	16.2432	0.698203	0.485951	0.961983	-0.0283194	-0.532555	0.475917	15.9561	-0.111789	0.911274	0.992091	0	0
hilic	pm2.5	lur	1	0	551.021	119.478	-0.150294	-0.574957	0.274368	15.8236	-0.696868	0.486501	0.941147	0.0337926	-0.501758	0.569343	15.796	0.124509	0.901051	0.990901	-0.622945	-1.33024	0.084353	15.8842	-1.75306	0.0834698	0.855884	0	0
hilic	pm2.5	lur	1	0	149.096	25.737	-0.0497735	-0.190457	0.0909099	19.2393	-0.696637	0.486645	0.941147	-0.0309011	-0.215471	0.153668	19.2931	-0.330364	0.741509	0.982115	-0.143589	-0.348914	0.0617352	19.1209	-1.39198	0.167836	0.855884	0	0
hilic	pm2.5	lur	1	0	314.158	42.873	0.108122	-0.197502	0.413747	25.507	0.696593	0.486673	0.941147	0.14138	-0.244505	0.527264	25.3738	0.722949	0.47065	0.961983	-0.0072719	-0.51834	0.503796	25.8005	-0.0283218	0.977477	0.998705	0	0
hilic	pm2.5	lur	1	0	169.059	96.539	0.0295605	-0.0540956	0.113217	28.5182	0.695768	0.487188	0.941147	-0.0208243	-0.124247	0.0825988	28.5295	-0.397311	0.691609	0.970577	0.118551	-0.0372378	0.274339	28.4934	1.51467	0.133845	0.855884	0	0
hilic	pm2.5	lur	1	0	163.108	261.301	0.0757175	-0.138563	0.289998	19.3813	0.695768	0.487188	0.941147	-0.0053396	-0.279659	0.26898	19.2895	-0.0384088	0.969404	0.994389	0.255352	-0.095686	0.606391	19.5836	1.44789	0.151604	0.855884	0	0
hilic	pm2.5	lur	1	0	320.967	76.018	-0.0859424	-0.329189	0.157304	22.863	-0.695684	0.487241	0.941147	-0.059303	-0.37136	0.252754	22.8774	-0.374991	0.708108	0.971151	-0.107121	-0.500563	0.286321	22.8312	-0.541932	0.58939	0.927631	0	0
hilic	pm2.5	lur	1	0	177.055	24.128	0.0427582	-0.0782849	0.163801	20.6753	0.695553	0.487323	0.941147	0.0737133	-0.0841448	0.231572	20.6969	0.921419	0.358065	0.961983	-0.0735127	-0.262445	0.11542	20.6276	-0.774473	0.440962	0.905711	0	0
hilic	pm2.5	lur	1	0	268.102	155.942	0.145838	-0.267166	0.558843	18.4409	0.695294	0.487485	0.941147	0.243055	-0.268899	0.755009	18.3949	0.936811	0.350111	0.961983	-0.0019931	-0.740564	0.736578	18.542	-0.0053715	0.995728	0.999568	0	0
hilic	pm2.5	lur	1	0	243.038	232.55	0.0769292	-0.140969	0.294827	27.304	0.695167	0.487564	0.941147	0.0930031	-0.165293	0.351299	27.309	0.710491	0.47832	0.961983	0.0540467	-0.383089	0.491182	27.2929	0.246095	0.806247	0.9738	0	0
hilic	pm2.5	lur	1	0	277.18	290.668	-0.08906	-0.341481	0.163361	21.5794	-0.694718	0.487845	0.941147	0.0300515	-0.272157	0.33226	21.6359	0.196218	0.844661	0.989597	-0.255978	-0.739305	0.22735	21.4549	-1.05417	0.295018	0.895002	0	0
hilic	pm2.5	lur	1	0	118.086	76.01	0.0321063	-0.058963	0.123176	32.0609	0.694175	0.488185	0.941147	0.0459226	-0.0646814	0.156527	32.0937	0.819282	0.413709	0.961983	0.0040696	-0.178235	0.186374	31.9886	0.044433	0.964671	0.998705	0	0
hilic	pm2.5	lur	1	0	338.081	88.505	0.17892	-0.329423	0.687263	18.5596	0.693032	0.488901	0.941147	0.225391	-0.392543	0.843325	18.3881	0.719736	0.472621	0.961983	0.0887984	-0.874277	1.05187	18.9374	0.183525	0.854856	0.980706	0	0
hilic	pm2.5	lur	1	0	250.064	59.738	-0.0499309	-0.191852	0.0919905	22.3084	-0.692744	0.489082	0.941147	0.0471161	-0.112285	0.206517	22.2501	0.583252	0.560454	0.961983	-0.282734	-0.589075	0.0236072	22.4367	-1.83706	0.0699614	0.855884	0	0
hilic	pm2.5	lur	1	0	444.929	84.145	-0.0757012	-0.291138	0.139735	23.172	-0.691886	0.489619	0.941147	-0.100572	-0.378478	0.177335	23.1925	-0.714094	0.476094	0.961983	-0.0339286	-0.378167	0.310309	23.127	-0.196181	0.844972	0.980706	0	0
hilic	pm2.5	lur	1	0	721.503	37.507	-0.131667	-0.506381	0.243048	17.106	-0.691874	0.489627	0.941147	0.0782934	-0.432451	0.589037	16.8444	0.302482	0.762634	0.984574	-0.434044	-0.842289	-0.0257995	17.6823	-2.11623	0.0374732	0.855884	0	0
hilic	pm2.5	lur	1	0	332.08	93.206	-0.12938	-0.49759	0.238831	18.3844	-0.691865	0.489632	0.941147	-0.365872	-0.828265	0.0965221	18.1945	-1.56133	0.120202	0.891976	0.436838	-0.191782	1.06546	18.8026	1.38319	0.170502	0.855884	0	0
hilic	pm2.5	lur	1	0	217.998	291.223	0.125973	-0.233296	0.485241	19.1766	0.690413	0.490543	0.941314	0.0630122	-0.337985	0.46401	19.2463	0.310071	0.756866	0.984574	0.333969	-0.453802	1.12174	19.0231	0.843833	0.40131	0.901942	0	0
hilic	pm2.5	lur	1	0	221.117	278.988	-0.126234	-0.486477	0.234008	19.8257	-0.689976	0.490818	0.941314	0.0256828	-0.417766	0.469132	19.7729	0.114282	0.909142	0.990901	-0.437443	-1.09481	0.21992	19.9418	-1.32454	0.189141	0.855884	0	0
hilic	pm2.5	lur	1	0	288.079	53.383	0.219826	-0.407707	0.84736	16.6084	0.689753	0.490958	0.941314	0.281318	-0.50477	1.06741	16.1187	0.706162	0.481	0.961983	0.348482	-0.719861	1.41682	17.6871	0.649262	0.518052	0.920494	0	0
hilic	pm2.5	lur	1	0	234.929	136.012	-0.0983854	-0.379522	0.182751	18.4075	-0.689071	0.491386	0.941314	-0.294678	-0.6422	0.0528436	18.365	-1.67319	0.0960279	0.883312	0.359949	-0.126898	0.846796	18.5011	1.47163	0.145092	0.855884	0	0
hilic	pm2.5	lur	1	0	610.931	46.657	0.0750141	-0.139372	0.2894	21.1692	0.688966	0.491452	0.941314	0.136337	-0.146511	0.419186	20.9757	0.951127	0.342815	0.961983	-0.120825	-0.423673	0.182024	21.5953	-0.794109	0.42951	0.905711	0	0
hilic	pm2.5	lur	1	0	313.998	75.133	-0.19789	-0.765591	0.36981	17.6103	-0.686366	0.493087	0.94378	-0.0507916	-0.763464	0.66188	17.734	-0.140631	0.888319	0.990901	-0.37549	-1.35583	0.604848	17.338	-0.762383	0.448101	0.905711	0	0
hilic	pm2.5	lur	1	0	403.232	176.514	-0.0905349	-0.350791	0.169721	18.4355	-0.684961	0.493972	0.944247	0.0394379	-0.259663	0.338539	18.4555	0.26018	0.795022	0.986872	-0.381009	-0.929164	0.167146	18.3915	-1.38351	0.170405	0.855884	0	0
hilic	pm2.5	lur	1	0	177.127	22.073	-0.109487	-0.424975	0.206	18.4404	-0.683333	0.494998	0.944247	-0.142442	-0.538902	0.254018	18.3828	-0.708951	0.479272	0.961983	-0.050542	-0.596419	0.495335	18.5673	-0.184293	0.854256	0.980706	0	0
hilic	pm2.5	lur	1	0	281.166	29.131	0.231435	-0.435517	0.898387	15.0083	0.683258	0.495045	0.944247	0.05182	-0.683059	0.786699	15.0223	0.139143	0.889493	0.990901	0.696397	-0.735223	2.12802	14.9776	0.968232	0.335883	0.895002	0	0
hilic	pm2.5	lur	1	0	241.216	124.231	-0.0833803	-0.323715	0.156954	20.5437	-0.683122	0.495131	0.944247	-0.100264	-0.377727	0.177199	20.6562	-0.713045	0.476741	0.961983	-0.0320055	-0.539103	0.475092	20.2958	-0.125627	0.900346	0.992091	0	0
hilic	pm2.5	lur	1	0	254.824	72.613	0.0227248	-0.0427969	0.0882465	27.7221	0.682914	0.495262	0.944247	0.0109721	-0.0711852	0.0931293	27.7221	0.263524	0.792448	0.986872	0.0543633	-0.074192	0.182919	27.7219	0.841717	0.402487	0.901942	0	0
hilic	pm2.5	lur	1	0	251.164	278.87	0.137784	-0.259919	0.535487	19.3829	0.682168	0.495733	0.944247	0.226156	-0.237746	0.690057	19.4124	0.961966	0.337357	0.961983	0.028993	-0.786196	0.844183	19.318	0.0707921	0.943742	0.992536	0	0
hilic	pm2.5	lur	1	0	345.23	45.062	0.231005	-0.436151	0.898161	17.3661	0.681781	0.495978	0.944247	0.493585	-0.360563	1.34773	17.7724	1.14027	0.25569	0.961983	-0.408871	-1.49704	0.679295	16.4712	-0.747896	0.456743	0.910768	0	0
hilic	pm2.5	lur	1	0	277.103	98.434	0.249311	-0.470939	0.96956	17.1147	0.681568	0.496112	0.944247	0.662312	-0.227218	1.55184	17.314	1.4692	0.143525	0.916187	-0.847327	-2.06601	0.371356	16.6756	-1.38392	0.17028	0.855884	0	0
hilic	pm2.5	lur	1	0	290.765	66.431	0.16513	-0.313147	0.643407	18.5792	0.679826	0.497213	0.945567	-0.220685	-0.833899	0.39253	18.5104	-0.71013	0.478542	0.961983	1.00136	0.254233	1.74849	18.7307	2.66776	0.00926112	0.855884	0	0
hilic	pm2.5	lur	1	0	550.29	63.282	-0.198661	-0.774822	0.377501	19.2817	-0.67892	0.497785	0.945567	-0.139828	-0.857109	0.577453	18.9145	-0.384665	0.70094	0.970577	-0.256057	-1.27424	0.762128	20.0905	-0.500565	0.618069	0.932597	0	0
hilic	pm2.5	lur	1	0	113.741	52.862	0.168279	-0.319841	0.656399	20.5168	0.678818	0.49785	0.945567	0.0740047	-0.538794	0.686804	20.554	0.238298	0.811921	0.987696	0.472887	-0.361385	1.30716	20.435	1.12824	0.262634	0.886342	0	0
hilic	pm2.5	lur	1	0	307.991	115.142	-0.149264	-0.583118	0.28459	18.2739	-0.677426	0.498731	0.946232	-0.38101	-0.887372	0.125353	18.2086	-1.48475	0.13936	0.915223	0.470298	-0.391828	1.33242	18.4175	1.08581	0.280866	0.895002	0	0
hilic	pm2.5	lur	1	0	93.07	122.075	-0.0739949	-0.289154	0.141164	20.4543	-0.677164	0.498897	0.946232	0.0552028	-0.20168	0.312086	20.491	0.424037	0.672045	0.970577	-0.291185	-0.693274	0.110903	20.3736	-1.44145	0.15341	0.855884	0	0
hilic	pm2.5	lur	1	0	171.982	75.776	-0.0520792	-0.203828	0.0996696	21.7581	-0.675756	0.499789	0.947263	-0.0926987	-0.287489	0.102091	21.7949	-0.939042	0.348968	0.961983	0.0173207	-0.231805	0.266447	21.6771	0.138387	0.890286	0.990991	0	0
hilic	pm2.5	lur	1	0	360.15	108.476	0.0874602	-0.167888	0.342808	20.2598	0.674417	0.500638	0.947852	0.0149609	-0.310955	0.340877	20.3582	0.0905797	0.927927	0.990901	0.29336	-0.129348	0.716068	20.0431	1.38137	0.171059	0.855884	0	0
hilic	pm2.5	lur	1	0	212.999	73.071	-0.0362814	-0.142281	0.0697177	25.7456	-0.673957	0.50093	0.947852	-0.0335927	-0.159091	0.0919053	25.7603	-0.528185	0.598021	0.966918	-0.0677816	-0.284522	0.148959	25.7132	-0.622476	0.535421	0.920494	0	0
hilic	pm2.5	lur	1	0	608.447	37.4	-0.183535	-0.720022	0.352951	17.0597	-0.673616	0.501147	0.947852	-0.257511	-1.02818	0.513158	16.5654	-0.659334	0.510524	0.961983	0.0394959	-0.2563	0.335292	18.1483	0.265773	0.791107	0.970036	0	0
hilic	pm2.5	lur	1	0	216.833	67.757	0.0196	-0.0378996	0.0770996	23.0718	0.671185	0.502692	0.948764	0.00856044	-0.0579671	0.075088	23.0632	0.253906	0.799858	0.986872	0.0616314	-0.0676083	0.190871	23.0907	0.949197	0.345415	0.895002	0	0
hilic	pm2.5	lur	1	0	381.023	85.252	-0.080397	-0.316308	0.155514	22.512	-0.67103	0.50279	0.948764	-0.257922	-0.55693	0.0410862	22.4516	-1.70209	0.0904644	0.883312	0.322303	-0.0563593	0.700965	22.6451	1.69419	0.0941674	0.855884	0	0
hilic	pm2.5	lur	1	0	614.6	67.891	0.0220868	-0.042742	0.0869157	25.6157	0.670836	0.502914	0.948764	0.0144323	-0.0711995	0.100064	25.5959	0.332567	0.739848	0.981794	0.0215917	-0.0885676	0.131751	25.6594	0.390135	0.697486	0.945635	0	0
hilic	pm2.5	lur	1	0	398.006	146.675	0.128076	-0.24795	0.504103	15.64	0.670658	0.503027	0.948764	0.241369	-0.235844	0.718581	15.7644	0.998037	0.319601	0.961983	-0.0022987	-0.617722	0.613124	15.3659	-0.0074348	0.994087	0.999568	0	0
hilic	pm2.5	lur	1	0	170.989	76.163	0.159456	-0.310061	0.628973	19.9381	0.668714	0.504264	0.949219	0.131743	-0.426063	0.689548	19.9975	0.466039	0.641751	0.970577	0.115912	-0.811413	1.04324	19.8073	0.248798	0.804163	0.9738	0	0
hilic	pm2.5	lur	1	0	386.777	36.451	0.194276	-0.379556	0.768108	15.8831	0.66663	0.505593	0.949219	0.401479	-0.259177	1.06214	16.1205	1.19913	0.232055	0.961983	-0.130214	-1.27307	1.01264	15.3603	-0.226785	0.821177	0.980706	0	0
hilic	pm2.5	lur	1	0	357.3	37.783	0.057852	-0.113139	0.228843	22.3829	0.666186	0.505876	0.949219	0.0983735	-0.101672	0.298419	22.3544	0.970346	0.333176	0.961983	0.0474577	-0.30114	0.396055	22.4458	0.270977	0.787115	0.970036	0	0
hilic	pm2.5	lur	1	0	152.074	89.244	0.141891	-0.27759	0.561372	20.6395	0.666029	0.505976	0.949219	0.246042	-0.27439	0.766474	20.5684	0.932875	0.352134	0.961983	-0.0910528	-0.848083	0.665978	20.7963	-0.239403	0.811413	0.977294	0	0
hilic	pm2.5	lur	1	0	297.012	81.22	0.133091	-0.260375	0.526556	19.1502	0.666026	0.505978	0.949219	0.307226	-0.166497	0.780949	19.1473	1.27971	0.202294	0.957234	-0.167612	-0.89765	0.562426	19.1568	-0.456993	0.64893	0.937675	0	0
hilic	pm2.5	lur	1	0	368.781	65.261	-0.229679	-0.908957	0.4496	16.2906	-0.665769	0.506142	0.949219	-0.673744	-1.53674	0.189255	16.1287	-1.5405	0.125194	0.891976	0.900755	-0.179737	1.98125	16.6473	1.65934	0.101012	0.855884	0	0
hilic	pm2.5	lur	1	0	519.879	37.717	-0.17935	-0.709827	0.351127	16.9403	-0.66571	0.50618	0.949219	0.0239621	-0.691699	0.739623	16.5143	0.0660688	0.947396	0.990987	-0.25602	-0.786737	0.274698	17.8786	-0.960197	0.339885	0.895002	0	0
hilic	pm2.5	lur	1	0	255.944	278.262	0.0568733	-0.111408	0.225155	22.9618	0.66546	0.506339	0.949219	0.0335721	-0.13996	0.207104	22.9496	0.381748	0.703098	0.970577	-0.0027356	-0.405804	0.400333	22.9889	-0.0135088	0.989256	0.999189	0	0
hilic	pm2.5	lur	1	0	191.103	98.217	-0.0585472	-0.231812	0.114718	20.6279	-0.665344	0.506413	0.949219	-0.124016	-0.335233	0.0872023	20.6635	-1.15857	0.248165	0.961983	0.099989	-0.224812	0.42479	20.5496	0.612752	0.5418	0.920494	0	0
hilic	pm2.5	lur	1	0	519.404	36.925	-0.117266	-0.465035	0.230504	15.618	-0.663942	0.507309	0.949951	0.0738155	-0.30928	0.456911	15.7369	0.380205	0.704241	0.970577	-0.497026	-1.24296	0.248905	15.3562	-1.32627	0.188572	0.855884	0	0
hilic	pm2.5	lur	1	0	332.243	43.862	-0.0985641	-0.391005	0.193877	23.1726	-0.663638	0.507503	0.949951	-0.312177	-0.678309	0.0539555	23.094	-1.68244	0.0942167	0.883312	0.270536	-0.197433	0.738505	23.3455	1.15069	0.253331	0.883243	0	0
hilic	pm2.5	lur	1	0	173.092	90.691	-0.0768182	-0.305054	0.151418	20.6805	-0.662721	0.50809	0.950185	-0.172912	-0.452684	0.106859	20.8171	-1.21955	0.22423	0.961983	0.125021	-0.297079	0.547121	20.3795	0.589546	0.557177	0.920494	0	0
hilic	pm2.5	lur	1	0	207.018	265.919	0.0279659	-0.0552457	0.111178	23.6878	0.661754	0.508708	0.950185	0.0368826	-0.0412784	0.115044	23.6993	0.931128	0.353035	0.961983	0.0225394	-0.202213	0.247292	23.6624	0.199613	0.842296	0.980706	0	0
hilic	pm2.5	lur	1	0	282.118	120.921	0.0959498	-0.189633	0.381532	19.5723	0.661551	0.508838	0.950185	0.147556	-0.217499	0.512611	19.5767	0.797586	0.426162	0.961983	0.0307181	-0.435791	0.497227	19.5627	0.131064	0.896057	0.992091	0	0
hilic	pm2.5	lur	1	0	221.117	25.576	-0.0448896	-0.178558	0.0887784	19.2187	-0.661255	0.509028	0.950185	-0.035297	-0.208163	0.137568	19.2632	-0.40291	0.687493	0.970577	-0.0758618	-0.29089	0.139166	19.1208	-0.702229	0.4846	0.920114	0	0
hilic	pm2.5	lur	1	0	546.83	77.148	-0.0432138	-0.172332	0.0859045	23.9022	-0.659	0.510472	0.952227	-0.0563429	-0.207213	0.0945274	23.9085	-0.736908	0.462138	0.961983	-0.0299157	-0.298078	0.238247	23.8883	-0.22205	0.824848	0.980706	0	0
hilic	pm2.5	lur	1	0	117.066	268.314	0.0786439	-0.157148	0.314435	19.7959	0.656731	0.511928	0.953469	0.0883366	-0.189039	0.365712	19.889	0.628421	0.530525	0.961983	-0.120071	-0.567812	0.32767	19.5909	-0.53378	0.594992	0.928876	0	0
hilic	pm2.5	lur	1	0	169.046	248.553	0.067772	-0.135522	0.271066	20.9737	0.656414	0.512132	0.953469	0.0929651	-0.143943	0.329873	20.9825	0.774317	0.439759	0.961983	-0.0337932	-0.441353	0.373766	20.9544	-0.16504	0.869334	0.984184	0	0
hilic	pm2.5	lur	1	0	286.951	53.996	0.14886	-0.298029	0.595748	19.2399	0.655887	0.51247	0.953469	-0.014072	-0.571091	0.542947	18.9306	-0.04985	0.960297	0.992363	0.535003	-0.237706	1.30771	19.921	1.37813	0.172053	0.855884	0	0
hilic	pm2.5	lur	1	0	182.022	252.216	0.0734873	-0.147345	0.29432	20.3709	0.65524	0.512886	0.953469	0.151871	-0.118789	0.422532	20.4301	1.10721	0.269682	0.961983	-0.0479185	-0.450522	0.354685	20.2406	-0.236906	0.813343	0.979184	0	0
hilic	pm2.5	lur	1	0	433.241	38.2	0.131093	-0.262854	0.525039	23.1125	0.655228	0.512893	0.953469	-0.0431541	-0.52797	0.441662	23.3357	-0.17564	0.860774	0.989597	0.354507	-0.346185	1.0552	22.6209	1.00704	0.316988	0.895002	0	0
hilic	pm2.5	lur	1	0	105.104	58.689	0.0416647	-0.0838621	0.167192	31.0244	0.653556	0.513969	0.954437	0.118722	-0.0300626	0.267506	30.9669	1.57453	0.117121	0.891976	-0.141867	-0.392722	0.108988	31.1512	-1.12567	0.263714	0.886342	0	0
hilic	pm2.5	lur	1	0	186.132	44.034	-0.0946013	-0.379904	0.190701	22.0839	-0.652894	0.514395	0.954437	-0.288924	-0.648281	0.0704334	21.9788	-1.58648	0.114385	0.891976	0.353926	-0.127663	0.835514	22.3155	1.4628	0.147488	0.855884	0	0
hilic	pm2.5	lur	1	0	496.84	72.752	-0.0713402	-0.28666	0.14398	23.5819	-0.652381	0.514725	0.954437	-0.0512313	-0.324603	0.222141	23.5203	-0.369793	0.711971	0.971677	-0.0769702	-0.433626	0.279685	23.7174	-0.42956	0.668685	0.941473	0	0
hilic	pm2.5	lur	1	0	116.063	79.308	0.11651	-0.235221	0.468241	19.9659	0.652234	0.51482	0.954437	-0.0088833	-0.431549	0.413782	20.0023	-0.0414723	0.966965	0.994389	0.360869	-0.322787	1.04453	19.8858	1.05066	0.296618	0.895002	0	0
hilic	pm2.5	lur	1	0	233.157	52.024	-0.0542809	-0.218483	0.109922	22.815	-0.650905	0.515676	0.955119	-0.24264	-0.441876	-0.043404	22.8694	-2.4031	0.0172725	0.883312	0.433689	0.14516	0.722217	22.6952	2.99185	0.00369803	0.855884	0	0
hilic	pm2.5	lur	1	0	250.129	33.304	0.138229	-0.280135	0.556593	18.6799	0.650572	0.515891	0.955119	-0.0384417	-0.510077	0.433194	18.549	-0.160833	0.872406	0.989597	0.284966	-0.583512	1.15344	18.968	0.653108	0.515583	0.920114	0	0
hilic	pm2.5	lur	1	0	397.936	84.263	-0.185524	-0.748037	0.376989	18.5364	-0.649409	0.51664	0.955855	-0.575185	-1.23971	0.0893427	18.6304	-1.70794	0.0893716	0.883312	0.473006	-0.620426	1.56644	18.3295	0.861044	0.391819	0.895002	0	0
hilic	pm2.5	lur	1	0	364.22	40.895	-0.233419	-0.94264	0.475802	17.8983	-0.648045	0.517521	0.956055	-0.278248	-1.15178	0.59528	18.1268	-0.628541	0.530446	0.961983	-0.296145	-1.57673	0.984444	17.3949	-0.460304	0.646562	0.937675	0	0
hilic	pm2.5	lur	1	0	182.048	80.627	-0.170453	-0.689021	0.348114	19.8969	-0.647219	0.518054	0.956055	-0.205481	-0.786172	0.37521	19.8972	-0.69824	0.485928	0.961983	-0.383632	-1.48265	0.715389	19.8961	-0.694799	0.489219	0.920114	0	0
hilic	pm2.5	lur	1	0	194.049	100.065	-0.0891339	-0.360365	0.182097	20.6633	-0.647074	0.518148	0.956055	-0.245223	-0.578078	0.0876333	20.628	-1.45372	0.147764	0.920753	0.246557	-0.218325	0.711438	20.7411	1.05566	0.29434	0.895002	0	0
hilic	pm2.5	lur	1	0	150.977	54.445	0.101493	-0.207613	0.410599	21.6969	0.646516	0.518509	0.956055	-0.0023186	-0.373126	0.368488	21.5025	-0.0123383	0.990169	0.996575	0.329024	-0.243298	0.901346	22.1251	1.14429	0.255957	0.883262	0	0
hilic	pm2.5	lur	1	0	560.475	37.716	-0.172599	-0.698845	0.353648	17.311	-0.645802	0.518971	0.956055	-0.127955	-0.769938	0.514027	17.1214	-0.39329	0.694571	0.970577	-0.29197	-1.26369	0.679747	17.7285	-0.598065	0.551507	0.920494	0	0
hilic	pm2.5	lur	1	0	707.095	41.767	0.193796	-0.397384	0.784976	15.7499	0.645471	0.519185	0.956055	0.575112	-0.22477	1.37499	15.276	1.41875	0.157702	0.92383	-0.473478	-1.1364	0.189449	16.7937	-1.42162	0.159071	0.855884	0	0
hilic	pm2.5	lur	1	0	187.144	33.598	0.0933753	-0.191487	0.378238	18.1099	0.645428	0.519213	0.956055	0.121656	-0.209887	0.453199	18.21	0.724055	0.469972	0.961983	-0.0330346	-0.621666	0.555596	17.8892	-0.111706	0.91134	0.992091	0	0
hilic	pm2.5	lur	1	0	135.977	85.052	0.129413	-0.266352	0.525179	17.5646	0.643861	0.520227	0.956798	0.175966	-0.297179	0.649111	17.5282	0.733859	0.46399	0.961983	-0.0390293	-0.792743	0.714685	17.6449	-0.10307	0.918168	0.992091	0	0
hilic	pm2.5	lur	1	0	200.008	165.009	0.0687246	-0.141494	0.278943	23.1735	0.643712	0.520323	0.956798	-0.0921432	-0.352239	0.167952	23.1738	-0.69905	0.485423	0.961983	0.350021	-0.0095618	0.709603	23.1727	1.93752	0.0562555	0.855884	0	0
hilic	pm2.5	lur	1	0	147.123	100.952	0.300717	-0.620131	1.22156	17.2558	0.643015	0.520775	0.956798	0.702059	-0.404531	1.80865	17.1252	1.25189	0.212235	0.961983	-0.104431	-1.8201	1.61123	17.5434	-0.121157	0.903874	0.992091	0	0
hilic	pm2.5	lur	1	0	121.974	71.121	0.0297969	-0.0615013	0.121095	23.8079	0.642629	0.521025	0.956798	0.0835401	-0.0133904	0.180471	23.803	1.70064	0.0907375	0.883312	-0.0795894	-0.298598	0.139419	23.8188	-0.723342	0.471606	0.918194	0	0
hilic	pm2.5	lur	1	0	463.13	39.122	0.182048	-0.377051	0.741147	16.2672	0.641134	0.521994	0.957424	0.306446	-0.357115	0.970007	16.4985	0.911278	0.363368	0.961983	-0.152807	-1.22103	0.915414	15.7578	-0.284729	0.776597	0.965845	0	0
hilic	pm2.5	lur	1	0	259.005	73.141	-0.0511414	-0.20827	0.105987	22.5839	-0.640869	0.522166	0.957424	-0.0872593	-0.278793	0.104275	22.6016	-0.898968	0.369871	0.961983	0.0270813	-0.267205	0.321367	22.5449	0.183168	0.855135	0.980706	0	0
hilic	pm2.5	lur	1	0	186.993	289.825	-0.134655	-0.548631	0.27932	19.0537	-0.640472	0.522423	0.957424	-0.0664937	-0.575277	0.44229	19.0078	-0.257885	0.796791	0.986872	-0.326543	-1.08804	0.434953	19.1548	-0.853537	0.395942	0.899897	0	0
hilic	pm2.5	lur	1	0	502.982	87.479	0.161426	-0.335565	0.658418	18.548	0.639553	0.52302	0.957871	-0.0064412	-0.627903	0.615021	18.5377	-0.0204517	0.983706	0.996575	0.480486	-0.309533	1.27051	18.5706	1.21058	0.229665	0.864849	0	0
hilic	pm2.5	lur	1	0	537.393	38.208	-0.11271	-0.461117	0.235697	18.1235	-0.63698	0.524692	0.960285	-0.114913	-0.602812	0.372987	17.8268	-0.464745	0.642676	0.970577	-0.10835	-0.447294	0.230593	18.777	-0.636286	0.526429	0.920494	0	0
hilic	pm2.5	lur	1	0	191.077	119.233	-0.0576236	-0.236262	0.121015	25.0013	-0.63515	0.525883	0.961816	-0.0287338	-0.259528	0.20206	24.9491	-0.245666	0.80622	0.987223	-0.036274	-0.305902	0.233354	25.1162	-0.267782	0.789565	0.970036	0	0
hilic	pm2.5	lur	1	0	285.902	76.253	-0.0483537	-0.198617	0.101909	23.3361	-0.63362	0.52688	0.962689	-0.0825397	-0.272182	0.107103	23.3705	-0.858827	0.391578	0.961983	0.00215515	-0.255059	0.259369	23.2603	0.0166776	0.986736	0.999189	0	0
hilic	pm2.5	lur	1	0	119.083	73.002	0.0363068	-0.0765711	0.149185	23.779	0.63333	0.527069	0.962689	0.02687	-0.114282	0.168022	23.8047	0.375627	0.707637	0.971151	0.0564077	-0.150827	0.263643	23.7224	0.541784	0.589492	0.927631	0	0
hilic	pm2.5	lur	1	0	139.988	286.058	-0.0881247	-0.362672	0.186422	24.3756	-0.632021	0.527922	0.962811	0.0108529	-0.208224	0.229929	24.2916	0.0977521	0.922238	0.990901	-0.398413	-1.1834	0.386578	24.5607	-1.01023	0.31547	0.895002	0	0
hilic	pm2.5	lur	1	0	189.123	85.138	-0.0395432	-0.162849	0.0837628	21.5533	-0.631449	0.528295	0.962811	-0.107563	-0.249833	0.0347061	21.61	-1.49187	0.137484	0.915223	0.0669768	-0.191778	0.325731	21.4285	0.515213	0.607843	0.92951	0	0
hilic	pm2.5	lur	1	0	220.093	95.297	-0.192052	-0.79114	0.407036	14.9037	-0.631217	0.528447	0.962811	-0.194013	-0.924923	0.536896	15.8101	-0.523777	0.601078	0.967704	-0.340469	-1.35298	0.672042	12.9076	-0.669311	0.505248	0.920114	0	0
hilic	pm2.5	lur	1	0	316.248	41.541	0.0679583	-0.144107	0.280024	26.2249	0.630992	0.528594	0.962811	-0.16068	-0.412112	0.0907528	26.1417	-1.26101	0.208938	0.961983	0.55272	0.163426	0.942013	26.4081	2.82604	0.00596603	0.855884	0	0
hilic	pm2.5	lur	1	0	165.991	262.634	0.0483237	-0.10269	0.199338	22.004	0.630077	0.529191	0.962811	-0.0016391	-0.196578	0.193299	22.0375	-0.0165915	0.986781	0.996575	0.1668	-0.0793171	0.412917	21.9302	1.34898	0.181198	0.855884	0	0
hilic	pm2.5	lur	1	0	186.93	172.084	-0.0850823	-0.351149	0.180984	20.0356	-0.629652	0.529469	0.962811	-0.207132	-0.498936	0.0846711	20.1099	-1.40067	0.163035	0.92383	0.255132	-0.3337	0.843963	19.8719	0.862429	0.391062	0.895002	0	0
hilic	pm2.5	lur	1	0	239.149	42.891	0.0702986	-0.149616	0.290213	22.3749	0.629425	0.529617	0.962811	0.0622305	-0.199052	0.323513	22.4503	0.46997	0.638945	0.970577	-0.0274206	-0.45778	0.402939	22.2088	-0.126823	0.899403	0.992091	0	0
hilic	pm2.5	lur	1	0	195.138	281.56	-0.161578	-0.668217	0.345062	18.9332	-0.627962	0.530574	0.96296	-0.359235	-0.861554	0.143084	19.0579	-1.41116	0.159922	0.92383	0.348227	-0.909958	1.60641	18.6586	0.550894	0.583261	0.927631	0	0
hilic	pm2.5	lur	1	0	149.071	27.429	0.0467731	-0.100373	0.193919	20.042	0.625892	0.531928	0.96296	0.0765991	-0.099465	0.252663	20.0656	0.858482	0.391768	0.961983	-0.0579013	-0.346519	0.230716	19.9901	-0.399315	0.690738	0.944899	0	0
hilic	pm2.5	lur	1	0	373.314	38.972	0.205947	-0.442667	0.854562	19.6734	0.625202	0.53238	0.96296	-0.171551	-0.914059	0.570956	19.6878	-0.455902	0.64901	0.970577	1.2195	-0.135088	2.57409	19.6418	1.79195	0.07697	0.855884	0	0
hilic	pm2.5	lur	1	0	146.6	96.634	0.0449056	-0.0965712	0.186382	20.8359	0.62498	0.532526	0.96296	-0.04093	-0.210086	0.128226	20.8462	-0.477454	0.633618	0.970577	0.18352	-0.0881198	0.455161	20.8133	1.34475	0.182555	0.855884	0	0
hilic	pm2.5	lur	1	0	738.506	65.96	0.0685384	-0.147632	0.284709	23.695	0.624293	0.532976	0.96296	0.137228	-0.12447	0.398926	23.7522	1.03471	0.30219	0.961983	-0.0486706	-0.463937	0.366596	23.569	-0.233287	0.816142	0.980381	0	0
hilic	pm2.5	lur	1	0	284.295	286.292	-0.144458	-0.600762	0.311845	20.2469	-0.623361	0.533587	0.96296	-0.416476	-0.943054	0.110103	20.4386	-1.56065	0.120364	0.891976	0.309214	-0.62678	1.24521	19.8248	0.657561	0.512731	0.920114	0	0
hilic	pm2.5	lur	1	0	189.164	37.537	-0.135481	-0.563824	0.292861	17.5323	-0.622787	0.533964	0.96296	-0.316412	-0.832749	0.199924	17.5979	-1.2092	0.228172	0.961983	0.18394	-0.605059	0.972939	17.3877	0.464034	0.643899	0.937675	0	0
hilic	pm2.5	lur	1	0	285.998	231.285	0.117928	-0.256236	0.492092	19.549	0.620592	0.535406	0.96296	0.0993951	-0.310958	0.509748	19.5419	0.477953	0.633264	0.970577	0.22419	-0.577735	1.02612	19.5645	0.556459	0.57947	0.926879	0	0
hilic	pm2.5	lur	1	0	472.83	39.613	0.200973	-0.436947	0.838894	16.1121	0.62033	0.535578	0.96296	0.411958	-0.385661	1.20958	16.3008	1.01914	0.309503	0.961983	-0.289194	-1.36785	0.789464	15.6966	-0.533649	0.595083	0.928876	0	0
hilic	pm2.5	lur	1	0	1146.21	67.781	0.125758	-0.273615	0.525131	20.747	0.620023	0.535779	0.96296	0.14054	-0.370717	0.651796	20.6347	0.542423	0.588198	0.964575	-0.153705	-0.78189	0.474479	20.9944	-0.487025	0.627589	0.93368	0	0
hilic	pm2.5	lur	1	0	176.066	64.35	-0.0367985	-0.153749	0.0801523	26.0724	-0.619552	0.536089	0.96296	-0.0121722	-0.144996	0.120652	26.1137	-0.18083	0.856704	0.989597	-0.0874499	-0.341742	0.166842	25.9812	-0.684506	0.495659	0.920114	0	0
hilic	pm2.5	lur	1	0	235.133	33.867	-0.088645	-0.370395	0.193105	20.0899	-0.6195	0.536123	0.96296	-0.178188	-0.535509	0.179133	20.264	-0.984008	0.326432	0.961983	0.167479	-0.309599	0.644557	19.7066	0.698749	0.48676	0.920114	0	0
hilic	pm2.5	lur	1	0	150.998	70.58	0.117427	-0.256212	0.491067	21.1531	0.618823	0.536568	0.96296	0.118446	-0.286446	0.523339	21.0958	0.577245	0.564495	0.961983	0.0666259	-0.778324	0.911576	21.2791	0.15695	0.875684	0.984419	0	0
hilic	pm2.5	lur	1	0	223.075	221.449	0.141542	-0.309917	0.593001	18.8124	0.61733	0.537551	0.96296	0.0161529	-0.510879	0.543185	18.8004	0.0604772	0.951843	0.991368	0.519139	-0.394451	1.43273	18.8389	1.13105	0.261455	0.886342	0	0
hilic	pm2.5	lur	1	0	178.059	121.526	-0.0349359	-0.146413	0.0765415	26.5641	-0.617073	0.537721	0.96296	-0.0611513	-0.197846	0.0755438	26.5947	-0.882736	0.378556	0.961983	0.033738	-0.178205	0.245681	26.4968	0.316848	0.752195	0.962753	0	0
hilic	pm2.5	lur	1	0	606.786	72.724	-0.0735526	-0.308374	0.161269	22.4572	-0.616753	0.537931	0.96296	-0.0221577	-0.244714	0.200399	22.5228	-0.196455	0.844476	0.989597	-0.117857	-0.726316	0.490602	22.3126	-0.385544	0.70087	0.946105	0	0
hilic	pm2.5	lur	1	0	340.284	34.592	-0.163715	-0.686522	0.359092	17.2086	-0.616592	0.538037	0.96296	-0.556854	-1.19424	0.0805355	17.4452	-1.72391	0.0864412	0.883312	0.784752	-0.160873	1.73038	16.6878	1.65182	0.102539	0.855884	0	0
hilic	pm2.5	lur	1	0	502.874	72.075	-0.1206	-0.50617	0.264969	20.4748	-0.615882	0.538505	0.96296	-0.0198946	-0.534457	0.494667	20.4051	-0.0762914	0.939272	0.990901	-0.265448	-0.797797	0.266902	20.6284	-0.992505	0.323981	0.895002	0	0
hilic	pm2.5	lur	1	0	300.217	41.757	-0.0734343	-0.308731	0.161862	22.5912	-0.614517	0.539405	0.96296	-0.171916	-0.431184	0.0873522	22.6625	-1.30841	0.192402	0.952101	0.15967	-0.360583	0.679924	22.4341	0.610885	0.543029	0.920494	0	0
hilic	pm2.5	lur	1	0	191.066	104.919	-0.0543992	-0.228917	0.120119	21.7527	-0.613767	0.5399	0.96296	-0.0681846	-0.277009	0.14064	21.7959	-0.644293	0.520206	0.961983	-0.0217825	-0.36635	0.322785	21.6576	-0.12583	0.900186	0.992091	0	0
hilic	pm2.5	lur	1	0	163.148	27.32	-0.0785209	-0.330731	0.173689	18.4244	-0.613018	0.540394	0.96296	-0.116781	-0.445031	0.211469	18.4627	-0.702013	0.483578	0.961983	0.0174767	-0.378446	0.413399	18.34	0.0878618	0.930209	0.992091	0	0
hilic	pm2.5	lur	1	0	125.526	51.595	0.189152	-0.418945	0.797249	17.3699	0.612476	0.540752	0.96296	0.256468	-0.442937	0.955874	17.079	0.723573	0.470267	0.961983	-0.102499	-1.37132	1.16632	18.0106	-0.160795	0.872666	0.984419	0	0
hilic	pm2.5	lur	1	0	209.128	48.362	-0.14944	-0.629876	0.330996	20.2734	-0.612466	0.540758	0.96296	-0.0269201	-0.612435	0.558595	20.2935	-0.0907229	0.927814	0.990901	-0.569831	-1.41495	0.275287	20.229	-1.34208	0.183414	0.855884	0	0
hilic	pm2.5	lur	1	0	446.371	36.593	-0.160181	-0.675339	0.354977	16.9172	-0.612239	0.540909	0.96296	-0.351171	-1.00276	0.300414	17.2642	-1.06347	0.288993	0.961983	0.415043	-0.410898	1.24098	16.1529	1.00022	0.320259	0.895002	0	0
hilic	pm2.5	lur	1	0	154.043	100.439	0.159631	-0.353767	0.67303	18.3105	0.61223	0.540915	0.96296	0.129514	-0.49764	0.756669	18.0145	0.407493	0.68413	0.970577	0.266567	-0.638651	1.17179	18.9624	0.586144	0.55945	0.921156	0	0
hilic	pm2.5	lur	1	0	129.039	86.685	-0.235715	-0.99491	0.523479	16.0958	-0.611344	0.5415	0.96296	-0.298484	-1.18371	0.586741	16.3412	-0.665343	0.506683	0.961983	-0.0193238	-1.55432	1.51567	15.5554	-0.0250574	0.980072	0.998828	0	0
hilic	pm2.5	lur	1	0	417.217	38.496	-0.217913	-0.919942	0.484115	18.612	-0.611195	0.541598	0.96296	0.010794	-0.83885	0.860438	19.0147	0.0250683	0.980028	0.996575	-0.908915	-2.23843	0.420595	17.725	-1.36076	0.177458	0.855884	0	0
hilic	pm2.5	lur	1	0	449.327	38.987	-0.0897501	-0.379139	0.199639	21.0941	-0.610667	0.541948	0.96296	0.0218848	-0.330557	0.374327	20.7687	0.122527	0.902618	0.990901	-0.211052	-0.731173	0.309069	21.8107	-0.807672	0.421704	0.905711	0	0
hilic	pm2.5	lur	1	0	128.019	136.442	0.0528853	-0.117673	0.223443	23.6989	0.61054	0.542032	0.96296	0.0459221	-0.16715	0.258994	23.7257	0.425279	0.671141	0.970577	0.0840451	-0.223145	0.391236	23.6398	0.544572	0.587582	0.927631	0	0
hilic	pm2.5	lur	1	0	638.607	64.302	0.141494	-0.314939	0.597927	20.1124	0.610398	0.542125	0.96296	0.207682	-0.31613	0.731495	20.0135	0.782351	0.435037	0.961983	0.125221	-0.825169	1.07561	20.3301	0.262256	0.793807	0.970036	0	0
hilic	pm2.5	lur	1	0	484.384	38.43	-0.225733	-0.954098	0.502631	17.5161	-0.610236	0.542232	0.96296	-0.299635	-1.35027	0.751004	16.7919	-0.562752	0.574304	0.963422	0.141563	-0.171939	0.455064	19.1109	0.898793	0.371494	0.895002	0	0
hilic	pm2.5	lur	1	0	214.058	107.625	0.0469724	-0.10471	0.198655	22.4	0.60976	0.542547	0.96296	-0.0536473	-0.238702	0.131407	22.429	-0.57204	0.568009	0.961983	0.217833	-0.0644769	0.500144	22.336	1.53585	0.128571	0.855884	0	0
hilic	pm2.5	lur	1	0	415.341	37.762	0.138311	-0.309428	0.586051	19.2947	0.608252	0.543545	0.96296	0.348649	-0.230619	0.927917	19.3584	1.18765	0.236538	0.961983	-0.191255	-0.880931	0.49842	19.1544	-0.551974	0.582524	0.927631	0	0
hilic	pm2.5	lur	1	0	253.978	65.733	0.160222	-0.359471	0.679915	19.7089	0.607052	0.54434	0.96296	0.157561	-0.45804	0.773162	19.8139	0.505042	0.614147	0.967904	-0.0559254	-1.04806	0.936209	19.4777	-0.112199	0.91095	0.992091	0	0
hilic	pm2.5	lur	1	0	168.961	152.214	0.0813753	-0.1826	0.345351	21.4739	0.606988	0.544382	0.96296	-0.0107087	-0.334394	0.312977	21.3965	-0.0652816	0.948022	0.990987	0.301081	-0.162302	0.764464	21.6446	1.29328	0.199682	0.855884	0	0
hilic	pm2.5	lur	1	0	542.747	65.348	0.108574	-0.243813	0.460961	20.7421	0.606678	0.544588	0.96296	0.0526687	-0.414528	0.519866	20.5986	0.222449	0.824217	0.988245	0.317089	-0.141212	0.77539	21.0579	1.37715	0.172356	0.855884	0	0
hilic	pm2.5	lur	1	0	164.493	116.843	-0.156932	-0.66688	0.353016	16.8171	-0.60595	0.54507	0.96296	-0.0900468	-0.72944	0.549347	16.9484	-0.277893	0.781413	0.986872	-0.166896	-1.05387	0.720083	16.5279	-0.374526	0.709016	0.947776	0	0
hilic	pm2.5	lur	1	0	112.112	31.488	0.110962	-0.249872	0.471797	18.4538	0.605506	0.545365	0.96296	0.200334	-0.25173	0.652398	18.5065	0.874444	0.383042	0.961983	-0.0757582	-0.703188	0.551671	18.3378	-0.240334	0.810694	0.976861	0	0
hilic	pm2.5	lur	1	0	415.211	38.018	0.103841	-0.233991	0.441672	25.4353	0.605226	0.545551	0.96296	-0.0931196	-0.517024	0.330784	25.6238	-0.433462	0.665198	0.970577	0.445956	-0.128306	1.02022	25.0201	1.54572	0.126167	0.855884	0	0
hilic	pm2.5	lur	1	0	559.471	36.399	-0.172694	-0.734711	0.389323	19.0276	-0.605031	0.54568	0.96296	-0.140698	-0.831278	0.549883	19.139	-0.402023	0.688144	0.970577	-0.207685	-1.20054	0.78517	18.7821	-0.41636	0.678276	0.944244	0	0
hilic	pm2.5	lur	1	0	123.066	147.796	-0.062432	-0.265741	0.140877	18.5905	-0.604648	0.545934	0.96296	0.081179	-0.168347	0.330705	18.5959	0.641957	0.521718	0.961983	-0.418062	-0.785244	-0.0508803	18.5788	-2.26626	0.0261709	0.855884	0	0
hilic	pm2.5	lur	1	0	428.176	148.955	0.161698	-0.365166	0.688562	15.2891	0.604306	0.546161	0.96296	0.282907	-0.329399	0.895214	15.3353	0.911703	0.363145	0.961983	-0.0978942	-1.15344	0.957652	15.1874	-0.184599	0.854016	0.980706	0	0
hilic	pm2.5	lur	1	0	151.148	26.651	0.0895327	-0.202211	0.381276	17.4131	0.60427	0.546185	0.96296	0.0151652	-0.365246	0.395576	17.4004	0.0786634	0.937388	0.990901	0.287338	-0.162875	0.73755	17.4411	1.27036	0.207686	0.855884	0	0
hilic	pm2.5	lur	1	0	463.869	68.988	-0.173975	-0.740879	0.392929	18.6755	-0.604265	0.546188	0.96296	0.0432949	-0.617298	0.703888	19.0055	0.129325	0.897245	0.990901	-0.275645	-1.39893	0.847642	17.9486	-0.488438	0.626592	0.93368	0	0
hilic	pm2.5	lur	1	0	278.91	270.991	0.0566786	-0.128219	0.241576	20.6845	0.603586	0.546639	0.96296	0.149942	-0.0544247	0.354309	20.6634	1.44774	0.149428	0.920753	-0.0889246	-0.497471	0.319622	20.731	-0.433242	0.666019	0.941473	0	0
hilic	pm2.5	lur	1	0	103.075	39.409	-0.129042	-0.550426	0.292342	19.6957	-0.60298	0.547042	0.96296	-0.0602843	-0.534815	0.414246	19.7873	-0.250679	0.802348	0.986872	-0.341353	-1.23917	0.556459	19.494	-0.756777	0.451434	0.906204	0	0
hilic	pm2.5	lur	1	0	1108.27	67.321	0.16499	-0.373871	0.703851	16.7319	0.602881	0.547108	0.96296	0.236675	-0.409394	0.882744	16.6273	0.722855	0.470707	0.961983	0.082597	-0.938348	1.10354	16.9623	0.161032	0.872479	0.984419	0	0
hilic	pm2.5	lur	1	0	113.096	23.843	-0.0464015	-0.197951	0.105148	19.1295	-0.602879	0.547109	0.96296	-0.114518	-0.309062	0.0800253	19.1386	-1.16155	0.246958	0.961983	0.0702321	-0.177969	0.318433	19.1095	0.563225	0.574876	0.925369	0	0
hilic	pm2.5	lur	1	0	388.254	41.378	0.163425	-0.371695	0.698545	22.1189	0.601337	0.548134	0.96296	0.313923	-0.316627	0.944474	22.4521	0.982385	0.327229	0.961983	-0.211916	-1.27214	0.848305	21.385	-0.397847	0.691816	0.944899	0	0
hilic	pm2.5	lur	1	0	103.058	87.989	-0.0338855	-0.144851	0.0770806	21.4985	-0.601277	0.548174	0.96296	-0.0351833	-0.176766	0.106399	21.5204	-0.490349	0.624485	0.969915	-0.0675369	-0.255867	0.120793	21.4504	-0.713794	0.477458	0.919047	0	0
hilic	pm2.5	lur	1	0	396.008	147.805	-0.139849	-0.597991	0.318294	16.3354	-0.601047	0.548326	0.96296	-0.270153	-0.866148	0.325841	16.4408	-0.894429	0.372287	0.961983	0.158641	-0.541588	0.858871	16.1033	0.450948	0.653262	0.939554	0	0
hilic	pm2.5	lur	1	0	264.24	26.115	-0.0721436	-0.308537	0.16425	18.6209	-0.600916	0.548414	0.96296	-0.0547652	-0.308767	0.199237	18.589	-0.425447	0.671019	0.970577	-0.0402957	-0.559539	0.478948	18.6911	-0.154468	0.877635	0.98446	0	0
hilic	pm2.5	lur	1	0	271.19	26.668	0.0538403	-0.122731	0.230412	18.691	0.600397	0.548759	0.96296	0.158455	-0.0391025	0.356013	18.6448	1.58267	0.115252	0.891976	-0.173159	-0.548105	0.201787	18.7926	-0.919236	0.36077	0.895002	0	0
hilic	pm2.5	lur	1	0	100.011	138.598	0.0564204	-0.128823	0.241664	22.0829	0.599715	0.549213	0.96296	0.160192	-0.0236615	0.344046	22.1165	1.71928	0.0872821	0.883312	-0.193109	-0.658595	0.272376	22.009	-0.825748	0.411434	0.905711	0	0
hilic	pm2.5	lur	1	0	308.125	37.899	-0.259957	-1.11435	0.594434	18.3458	-0.599094	0.549626	0.96296	-0.040273	-1.07027	0.989719	18.4507	-0.077154	0.938587	0.990901	-0.465401	-2.05732	1.12651	18.1148	-0.581912	0.562282	0.921156	0	0
hilic	pm2.5	lur	1	0	243.183	60.65	-0.173445	-0.743852	0.396962	16.8823	-0.598726	0.549871	0.96296	-0.0917694	-0.743213	0.559674	17.6488	-0.277971	0.781354	0.986872	-0.152542	-1.29981	0.994722	15.194	-0.264653	0.791966	0.970036	0	0
hilic	pm2.5	lur	1	0	422.655	65.679	-0.218656	-0.937814	0.500502	15.5353	-0.59867	0.549908	0.96296	-0.671219	-1.55091	0.208468	15.5688	-1.50562	0.133919	0.904786	0.665012	-0.611668	1.94169	15.4616	1.03681	0.302989	0.895002	0	0
hilic	pm2.5	lur	1	0	553.018	119.341	-0.138737	-0.596714	0.319241	15.986	-0.596483	0.551365	0.963674	0.0517542	-0.492508	0.596016	16.0205	0.187636	0.851374	0.989597	-0.50322	-1.39382	0.387385	15.9102	-1.12466	0.264136	0.886342	0	0
hilic	pm2.5	lur	1	0	598.085	36.822	-0.0894136	-0.384645	0.205818	17.4555	-0.596337	0.551463	0.963674	-0.0463326	-0.446003	0.353337	17.1681	-0.228751	0.819322	0.988245	-0.117747	-0.471172	0.235678	18.0885	-0.663134	0.509175	0.920114	0	0
hilic	pm2.5	lur	1	0	502.677	68.359	0.0283985	-0.0655311	0.122328	25.6634	0.595311	0.552148	0.963674	0.0306634	-0.0888198	0.150147	25.6236	0.506398	0.613197	0.967904	0.0327366	-0.135022	0.200496	25.7509	0.388417	0.698752	0.945635	0	0
hilic	pm2.5	lur	1	0	161.096	289.219	0.145051	-0.334846	0.624948	19.8249	0.595146	0.552258	0.963674	-0.216417	-0.79735	0.364517	19.7901	-0.735093	0.46324	0.961983	0.829155	-0.0418679	1.70018	19.9016	1.89477	0.0617812	0.855884	0	0
hilic	pm2.5	lur	1	0	316.184	113.486	0.109663	-0.253165	0.472491	17.4979	0.595129	0.552269	0.963674	0.170165	-0.291786	0.632115	17.533	0.726862	0.468255	0.961983	-0.0179473	-0.623632	0.587738	17.4207	-0.0589798	0.953117	0.996502	0	0
hilic	pm2.5	lur	1	0	183.084	72.425	-0.0420638	-0.181466	0.0973387	25.0327	-0.59414	0.552929	0.963674	-0.0237678	-0.194249	0.146713	25.0597	-0.2751	0.783555	0.986872	-0.0734557	-0.337439	0.190527	24.9734	-0.55386	0.581239	0.927523	0	0
hilic	pm2.5	lur	1	0	419.315	278.321	-0.0567398	-0.245137	0.131658	21.5644	-0.593012	0.553682	0.963674	0.0202295	-0.207891	0.24835	21.6041	0.174984	0.861289	0.989597	-0.217299	-0.576086	0.141489	21.4771	-1.20551	0.231605	0.866654	0	0
hilic	pm2.5	lur	1	0	217.993	75.588	-0.0777738	-0.33603	0.180482	21.2407	-0.592972	0.553709	0.963674	-0.114821	-0.428431	0.198789	21.3005	-0.722454	0.470953	0.961983	0.113439	-0.370223	0.597101	21.109	0.466842	0.641897	0.937675	0	0
hilic	pm2.5	lur	1	0	285.206	28.251	-0.0601165	-0.259755	0.139522	19.2997	-0.592925	0.553741	0.963674	0.00731155	-0.255772	0.270396	19.2822	0.0548395	0.956327	0.991368	-0.257954	-0.551669	0.0357609	19.3384	-1.7481	0.084331	0.855884	0	0
hilic	pm2.5	lur	1	0	142.991	21.681	0.0279615	-0.0650401	0.120963	19.9536	0.591999	0.55436	0.963674	0.0305334	-0.0852232	0.14629	19.9785	0.520484	0.603366	0.967904	0.00926111	-0.16637	0.184892	19.8987	0.104957	0.916676	0.992091	0	0
hilic	pm2.5	lur	1	0	118.11	75.449	0.0310606	-0.0725395	0.134661	24.1473	0.590338	0.555471	0.963674	0.0425714	-0.082198	0.167341	24.1779	0.673268	0.501641	0.961983	0.0089111	-0.200192	0.218014	24.08	0.0848246	0.932615	0.992091	0	0
hilic	pm2.5	lur	1	0	371.315	28.08	-0.0607024	-0.263288	0.141883	20.4752	-0.589996	0.5557	0.963674	-0.0592849	-0.333029	0.214459	20.5748	-0.427344	0.669639	0.970577	-0.140276	-0.403012	0.122459	20.2558	-1.06271	0.291149	0.895002	0	0
hilic	pm2.5	lur	1	0	416.214	39.069	0.130427	-0.30521	0.566064	23.3313	0.589513	0.556023	0.963674	-0.046907	-0.538134	0.44432	23.6663	-0.188423	0.850758	0.989597	0.493016	-0.446895	1.43293	22.5936	1.04406	0.299642	0.895002	0	0
hilic	pm2.5	lur	1	0	550.689	65.584	-0.19022	-0.825632	0.445191	16.6988	-0.589458	0.55606	0.963674	-0.0135158	-0.742559	0.715528	16.5061	-0.0365819	0.970859	0.995039	-0.386131	-1.69614	0.923882	17.1233	-0.586691	0.559084	0.921156	0	0
hilic	pm2.5	lur	1	0	369.894	67.014	-0.0686322	-0.297956	0.160692	20.6194	-0.58929	0.556172	0.963674	-0.0294358	-0.289132	0.230261	20.6431	-0.22366	0.823276	0.988245	-0.12802	-0.620737	0.364697	20.5672	-0.517167	0.606484	0.92951	0	0
hilic	pm2.5	lur	1	0	151.062	63.578	-0.0398072	-0.172954	0.0933395	22.9341	-0.588684	0.556578	0.963674	-0.0636126	-0.231184	0.103959	23.0318	-0.749066	0.454795	0.961983	-0.0112446	-0.246091	0.223602	22.7191	-0.0953035	0.924315	0.992091	0	0
hilic	pm2.5	lur	1	0	190.086	47.681	0.0592278	-0.138948	0.257404	22.399	0.588472	0.55672	0.963674	0.0342182	-0.197936	0.266373	22.4411	0.290843	0.771506	0.986872	0.121637	-0.273548	0.516822	22.3062	0.612655	0.541864	0.920494	0	0
hilic	pm2.5	lur	1	0	305.805	178.696	0.128955	-0.30269	0.5606	16.8703	0.588251	0.556869	0.963674	-0.0037926	-0.460981	0.453396	16.7	-0.016369	0.986958	0.996575	0.255736	-0.705711	1.21718	17.2455	0.529439	0.597985	0.92951	0	0
hilic	pm2.5	lur	1	0	502.358	40.094	-0.233859	-1.01775	0.550034	17.0983	-0.587419	0.557426	0.963674	-0.0526913	-0.937131	0.831748	17.5148	-0.117557	0.90655	0.990901	-0.771086	-2.39265	0.850479	16.1809	-0.946495	0.346782	0.895002	0	0
hilic	pm2.5	lur	1	0	285.119	136.136	-0.11425	-0.497291	0.268791	19.3541	-0.587304	0.557503	0.963674	-0.183546	-0.602306	0.235215	19.854	-0.864881	0.388255	0.961983	-0.0401184	-0.849885	0.769648	18.2529	-0.0986129	0.921695	0.992091	0	0
hilic	pm2.5	lur	1	0	216.063	122.209	0.0435144	-0.102625	0.189654	20.0916	0.586297	0.558179	0.963674	0.0851958	-0.0875585	0.25795	20.1438	0.973123	0.331798	0.961983	-0.0570495	-0.353794	0.239695	19.9766	-0.382665	0.702995	0.946152	0	0
hilic	pm2.5	lur	1	0	249.185	26.525	0.0373861	-0.0883541	0.163126	20.2206	0.585446	0.55875	0.963674	0.048599	-0.103043	0.200241	20.1832	0.63239	0.527935	0.961983	0.0004208	-0.245959	0.246801	20.303	0.00339952	0.997296	0.999568	0	0
hilic	pm2.5	lur	1	0	326.305	264.717	-0.0609222	-0.266194	0.14435	20.0125	-0.584383	0.559464	0.963674	0.0491858	-0.196927	0.295299	20.0198	0.394352	0.693788	0.970577	-0.324066	-0.722167	0.0740355	19.9964	-1.62028	0.109157	0.855884	0	0
hilic	pm2.5	lur	1	0	384.334	24.605	0.0460197	-0.109137	0.201176	18.5632	0.584016	0.55971	0.963674	0.103124	-0.101614	0.307862	18.5253	0.993893	0.321609	0.961983	-0.0510673	-0.279408	0.177273	18.6465	-0.445154	0.657426	0.939554	0	0
hilic	pm2.5	lur	1	0	496.086	88.617	-0.146469	-0.64039	0.347452	15.7107	-0.583901	0.559788	0.963674	0.0889659	-0.555969	0.733901	15.5964	0.272199	0.785781	0.986872	-0.661801	-1.38873	0.065128	15.9625	-1.81211	0.0737676	0.855884	0	0
hilic	pm2.5	lur	1	0	202.119	68.492	0.142937	-0.339097	0.624971	22.2548	0.583871	0.559807	0.963674	-0.0404833	-0.586474	0.505507	22.3215	-0.146308	0.883842	0.990901	0.538143	-0.45924	1.53553	22.108	1.07395	0.286112	0.895002	0	0
hilic	pm2.5	lur	1	0	311.221	35.693	-0.147213	-0.64378	0.349355	19.3343	-0.583739	0.559896	0.963674	-0.449541	-1.02774	0.128664	19.4208	-1.53414	0.126751	0.891976	0.659888	-0.319924	1.6397	19.1439	1.34053	0.183913	0.855884	0	0
hilic	pm2.5	lur	1	0	510.356	47.829	-0.029843	-0.131011	0.0713254	26.6868	-0.58083	0.561852	0.963739	0.0337608	-0.0784889	0.14601	26.7256	0.593479	0.553606	0.961983	-0.121979	-0.337882	0.0939248	26.6012	-1.12454	0.26419	0.886342	0	0
hilic	pm2.5	lur	1	0	158.981	164.256	0.0664146	-0.159534	0.292363	24.6735	0.578769	0.56324	0.963739	-0.055217	-0.34477	0.234336	24.6416	-0.37629	0.707145	0.971151	0.294861	-0.0642723	0.653995	24.7437	1.63423	0.10619	0.855884	0	0
hilic	pm2.5	lur	1	0	366.012	75.24	-0.165557	-0.729412	0.398298	18.6837	-0.578136	0.563667	0.963739	0.0171912	-0.660661	0.695044	18.9066	0.0500437	0.960143	0.992363	-0.592364	-1.62592	0.441194	18.1928	-1.14079	0.257405	0.883262	0	0
hilic	pm2.5	lur	1	0	367.335	36.549	-0.132828	-0.585298	0.319642	17.7762	-0.578032	0.563737	0.963739	0.148816	-0.421343	0.718975	18.255	0.515029	0.607165	0.967904	-0.572899	-1.30798	0.162185	16.7219	-1.55128	0.12483	0.855884	0	0
hilic	pm2.5	lur	1	0	214.253	27.103	0.0928128	-0.223996	0.409622	17.6996	0.576848	0.564535	0.963739	0.0752905	-0.292092	0.442673	17.7795	0.40439	0.686406	0.970577	0.0886533	-0.56625	0.743557	17.5238	0.269444	0.788291	0.970036	0	0
hilic	pm2.5	lur	1	0	316.858	67.215	0.162695	-0.392889	0.718278	18.3195	0.5766	0.564703	0.963739	0.398559	-0.278824	1.07594	18.1892	1.16101	0.247174	0.961983	-0.468767	-1.50659	0.569053	18.6064	-0.899053	0.371356	0.895002	0	0
hilic	pm2.5	lur	1	0	610.733	66.519	-0.106425	-0.470467	0.257617	16.6261	-0.57563	0.565358	0.963739	-0.0135466	-0.423027	0.395934	16.6358	-0.0652794	0.948024	0.990987	-0.103346	-0.88039	0.673698	16.6047	-0.264726	0.79191	0.970036	0	0
hilic	pm2.5	lur	1	0	119.09	75.714	0.0272106	-0.0659169	0.120338	27.8512	0.575322	0.565565	0.963739	0.0507597	-0.0629489	0.164468	27.8835	0.880854	0.379571	0.961983	-0.0179367	-0.201003	0.16513	27.7802	-0.195022	0.845876	0.980706	0	0
hilic	pm2.5	lur	1	0	186.113	60.121	-0.0398628	-0.176408	0.0966828	25.2943	-0.574832	0.565896	0.963739	-0.069462	-0.233985	0.095061	25.3098	-0.833103	0.405891	0.961983	0.0794624	-0.18726	0.346185	25.26	0.592996	0.554877	0.920494	0	0
hilic	pm2.5	lur	1	0	573.488	36.388	0.116731	-0.283428	0.51689	14.772	0.574387	0.566197	0.963739	0.219988	-0.266607	0.706583	14.7245	0.892093	0.373534	0.961983	-0.0592427	-0.811395	0.69291	14.8768	-0.156776	0.875821	0.984419	0	0
hilic	pm2.5	lur	1	0	169.086	284.667	0.154311	-0.375866	0.684489	17.192	0.573096	0.567069	0.963739	0.651512	0.0439964	1.25903	17.4076	2.11613	0.0357084	0.883312	-0.713553	-1.77786	0.35075	16.7171	-1.33448	0.18588	0.855884	0	0
hilic	pm2.5	lur	1	0	186.027	278.228	-0.0430279	-0.190883	0.104827	20.6308	-0.573015	0.567124	0.963739	0.00167744	-0.182568	0.185923	20.6291	0.0179651	0.985687	0.996575	-0.122702	-0.387492	0.142088	20.6344	-0.922361	0.359148	0.895002	0	0
hilic	pm2.5	lur	1	0	406.682	67.46	0.0389668	-0.0949548	0.172888	21.5229	0.572922	0.567187	0.963739	-0.0290819	-0.192973	0.134809	21.5074	-0.350143	0.726641	0.977492	0.224296	-0.0218918	0.470483	21.5571	1.81345	0.0735598	0.855884	0	0
hilic	pm2.5	lur	1	0	377.196	38.244	-0.193072	-0.857211	0.471068	16.1675	-0.572414	0.567531	0.963739	-0.0632859	-0.933581	0.807009	16.3668	-0.143489	0.886064	0.990901	-0.50648	-1.49601	0.483044	15.7286	-1.01879	0.31141	0.895002	0	0
hilic	pm2.5	lur	1	0	206.118	37.647	-0.0767323	-0.340775	0.18731	19.4286	-0.57221	0.567669	0.963739	-0.183931	-0.505614	0.137751	19.4652	-1.12825	0.260714	0.961983	0.271109	-0.20636	0.748579	19.3481	1.13018	0.261818	0.886342	0	0
hilic	pm2.5	lur	1	0	338.05	148.25	-0.128837	-0.572603	0.314928	18.8824	-0.571662	0.568039	0.963739	-0.185598	-0.716779	0.345584	18.928	-0.689458	0.491423	0.961983	0.108955	-0.738282	0.956191	18.7819	0.255971	0.798638	0.973128	0	0
hilic	pm2.5	lur	1	0	478.617	66.238	0.196008	-0.47927	0.871286	15.1666	0.571534	0.568126	0.963739	-0.0770093	-0.889948	0.73593	15.1775	-0.186923	0.851931	0.989597	0.742226	-0.544014	2.02847	15.1426	1.14859	0.254191	0.883262	0	0
hilic	pm2.5	lur	1	0	255.076	101.561	-0.136079	-0.605532	0.333373	18.447	-0.570757	0.568652	0.963739	-0.20637	-0.768443	0.355702	18.5345	-0.724491	0.469705	0.961983	-0.152814	-1.02231	0.716684	18.2542	-0.34982	0.727404	0.955334	0	0
hilic	pm2.5	lur	1	0	137.133	123.286	-0.0934316	-0.415862	0.228999	19.5889	-0.570569	0.568779	0.963739	-0.168759	-0.550507	0.212989	19.6587	-0.872306	0.384203	0.961983	0.12565	-0.515392	0.766693	19.4349	0.390146	0.697478	0.945635	0	0
hilic	pm2.5	lur	1	0	286	68.363	-0.142603	-0.635492	0.350285	20.6108	-0.569682	0.569379	0.963739	0.0210634	-0.467805	0.509932	20.8102	0.0850187	0.932341	0.990901	-0.593402	-1.81448	0.627677	20.1715	-0.967287	0.336352	0.895002	0	0
hilic	pm2.5	lur	1	0	498.835	74.46	-0.123323	-0.550301	0.303655	20.5867	-0.56871	0.570038	0.963739	-0.230303	-0.769987	0.309379	20.5789	-0.842054	0.400875	0.961983	0.16608	-0.561985	0.894144	20.6037	0.454043	0.651043	0.937675	0	0
hilic	pm2.5	lur	1	0	184.933	175.319	0.0600374	-0.148146	0.268221	20.8429	0.567841	0.570627	0.963739	0.106628	-0.155498	0.368754	20.8425	0.802673	0.423222	0.961983	0.0145306	-0.338326	0.367388	20.8438	0.0819663	0.934881	0.992091	0	0
hilic	pm2.5	lur	1	0	309.206	28.86	-0.104443	-0.466909	0.258023	18.6356	-0.567366	0.570949	0.963739	-0.11493	-0.612658	0.382797	18.7662	-0.45564	0.649198	0.970577	-0.0915576	-0.516051	0.332936	18.3478	-0.429313	0.668864	0.941473	0	0
hilic	pm2.5	lur	1	0	1052.39	67.333	-0.144698	-0.646916	0.357521	19.1939	-0.56731	0.570988	0.963739	0.184346	-0.368202	0.736895	19.2039	0.658328	0.511169	0.961983	-1.03073	-2.11296	0.0515023	19.172	-1.89572	0.0616533	0.855884	0	0
hilic	pm2.5	lur	1	0	285.221	28.424	-0.0801061	-0.358271	0.198059	18.9634	-0.567041	0.57117	0.963739	-0.0527555	-0.406984	0.301473	18.9717	-0.293874	0.769192	0.986872	-0.15095	-0.620062	0.318161	18.9453	-0.640484	0.523711	0.920494	0	0
hilic	pm2.5	lur	1	0	164.067	144.422	0.0515841	-0.128004	0.231172	24.7676	0.565574	0.572166	0.963739	0.0927936	-0.145026	0.330613	24.7646	0.769925	0.442354	0.961983	-0.0509673	-0.308743	0.206809	24.7742	-0.393549	0.694974	0.944899	0	0
hilic	pm2.5	lur	1	0	203.143	27.837	-0.114183	-0.511721	0.283354	17.6191	-0.565555	0.572178	0.963739	-0.0332276	-0.533162	0.466707	17.6851	-0.131149	0.895804	0.990901	-0.268886	-0.950636	0.412864	17.4737	-0.785042	0.434777	0.905711	0	0
hilic	pm2.5	lur	1	0	630.62	67.97	0.0334965	-0.0831732	0.150166	23.4655	0.565318	0.57234	0.963739	0.0392822	-0.0645859	0.14315	23.4803	0.746262	0.456483	0.961983	-0.0159728	-0.335224	0.303278	23.4329	-0.0995864	0.920925	0.992091	0	0
hilic	pm2.5	lur	1	0	178.126	108.232	0.136218	-0.339819	0.612255	18.0945	0.563437	0.573618	0.963739	0.0984909	-0.423325	0.620307	18.2107	0.37244	0.710003	0.97147	0.246913	-0.761453	1.25528	17.8385	0.48739	0.627332	0.93368	0	0
hilic	pm2.5	lur	1	0	114.558	139.181	0.0364647	-0.0910132	0.163943	23.0098	0.563233	0.573756	0.963739	0.0904136	-0.059754	0.240581	23.0592	1.18805	0.236378	0.961983	-0.0938848	-0.353991	0.166222	22.901	-0.718446	0.474601	0.919047	0	0
hilic	pm2.5	lur	1	0	223.096	34.833	-0.0725422	-0.326173	0.181089	21.3679	-0.56317	0.573799	0.963739	-0.192528	-0.498625	0.113568	21.4639	-1.24112	0.216176	0.961983	0.0197984	-0.439467	0.479064	21.1567	0.0858059	0.931838	0.992091	0	0
hilic	pm2.5	lur	1	0	117.07	34.592	0.120452	-0.300761	0.541666	18.4222	0.563073	0.573865	0.963739	-0.043238	-0.580714	0.494239	18.4577	-0.158739	0.874052	0.989597	0.524914	-0.169355	1.21918	18.344	1.50491	0.136334	0.855884	0	0
hilic	pm2.5	lur	1	0	270.23	36.512	-0.0408569	-0.184084	0.10237	23.3957	-0.561683	0.57481	0.963739	0.00099208	-0.179132	0.181116	23.4643	0.0108681	0.991341	0.996575	-0.113709	-0.356051	0.128633	23.2447	-0.933933	0.353184	0.895002	0	0
hilic	pm2.5	lur	1	0	242.968	231.44	0.153567	-0.384924	0.692059	16.62	0.561528	0.574916	0.963739	0.440566	-0.164279	1.04541	16.5988	1.43729	0.152371	0.92095	-0.4582	-1.57325	0.656853	16.6665	-0.817919	0.415863	0.905711	0	0
hilic	pm2.5	lur	1	0	145.955	20.996	0.0254678	-0.0639449	0.114881	19.3604	0.560845	0.575381	0.963739	0.0398396	-0.0745059	0.154185	19.402	0.687501	0.492652	0.961983	-0.0370486	-0.189196	0.115099	19.2688	-0.484682	0.629243	0.93368	0	0
hilic	pm2.5	lur	1	0	406.972	86.643	0.0469456	-0.118103	0.211995	21.9306	0.560058	0.575917	0.963739	0.0444622	-0.154422	0.243347	21.922	0.441132	0.659647	0.970577	0.0332565	-0.287831	0.354344	21.9496	0.206159	0.837197	0.980706	0	0
hilic	pm2.5	lur	1	0	363.017	77.333	-0.0947645	-0.428234	0.238705	21.6428	-0.559552	0.576261	0.963739	0.0140134	-0.388155	0.416182	21.6088	0.0687563	0.94526	0.990987	-0.299698	-0.937857	0.338461	21.7178	-0.934771	0.352754	0.895002	0	0
hilic	pm2.5	lur	1	0	874.336	81.897	0.128925	-0.324765	0.582614	19.6069	0.559536	0.576272	0.963739	0.32842	-0.208446	0.865286	19.5293	1.2071	0.228979	0.961983	-0.182879	-1.07873	0.712974	19.7778	-0.406329	0.6856	0.944899	0	0
hilic	pm2.5	lur	1	0	279.191	78.624	-0.208601	-0.943188	0.525986	17.6454	-0.559144	0.576539	0.963739	-0.289523	-1.19822	0.619175	17.4045	-0.628696	0.530345	0.961983	-0.099986	-1.42983	1.22986	18.1757	-0.149654	0.881419	0.986021	0	0
hilic	pm2.5	lur	1	0	312.943	297.334	0.0679542	-0.172165	0.308073	19.5396	0.557238	0.577839	0.963739	0.00761141	-0.28499	0.300213	19.6305	0.0513295	0.95912	0.992077	0.206694	-0.236741	0.650128	19.3393	0.927786	0.356344	0.895002	0	0
hilic	pm2.5	lur	1	0	527.928	87.028	-0.0787976	-0.35757	0.199975	21.4565	-0.556563	0.578299	0.963739	0.013513	-0.324578	0.351604	21.4303	0.0788673	0.937226	0.990901	-0.269177	-0.780311	0.241957	21.5141	-1.04822	0.297732	0.895002	0	0
hilic	pm2.5	lur	1	0	189.074	58.358	-0.0267267	-0.121302	0.0678481	26.5446	-0.556443	0.578381	0.963739	0.0155601	-0.0966123	0.127733	26.5672	0.273719	0.784614	0.986872	-0.135106	-0.331021	0.0608094	26.4947	-1.37264	0.173749	0.855884	0	0
hilic	pm2.5	lur	1	0	608.088	36.657	-0.0907916	-0.412262	0.230679	17.0323	-0.556103	0.578613	0.963739	0.00409342	-0.435588	0.443774	16.8128	0.0183707	0.985363	0.996575	-0.230303	-0.603662	0.143057	17.5157	-1.22778	0.223173	0.863414	0	0
hilic	pm2.5	lur	1	0	824.418	66.027	0.162897	-0.414351	0.740146	18.5073	0.555651	0.578922	0.963739	0.178961	-0.496424	0.854345	18.4977	0.52286	0.601715	0.967704	0.401515	-0.750023	1.55305	18.5284	0.694023	0.489703	0.920114	0	0
hilic	pm2.5	lur	1	0	263.013	231.83	0.123863	-0.315372	0.563099	21.9368	0.555259	0.579189	0.963739	0.101492	-0.415729	0.618713	21.8575	0.387199	0.699066	0.970577	0.191628	-0.6292	1.01246	22.1116	0.464683	0.643437	0.937675	0	0
hilic	pm2.5	lur	1	0	431.003	79.609	-0.17128	-0.778718	0.436157	18.0518	-0.555209	0.579223	0.963739	-0.28488	-1.01388	0.444121	18.102	-0.771101	0.441658	0.961983	0.113594	-1.03958	1.26677	17.9413	0.196069	0.84506	0.980706	0	0
hilic	pm2.5	lur	1	0	477.343	38.18	-0.120314	-0.547011	0.306383	17.5918	-0.555197	0.579232	0.963739	-0.0222656	-0.596787	0.552255	17.3111	-0.0764728	0.939128	0.990901	-0.299091	-0.843897	0.245716	18.21	-1.09272	0.277835	0.895002	0	0
hilic	pm2.5	lur	1	0	318.97	76.169	-0.0700388	-0.318449	0.178371	23.5302	-0.555163	0.579255	0.963739	-0.0626074	-0.381445	0.25623	23.5419	-0.387467	0.698868	0.970577	-0.0421587	-0.444419	0.360102	23.5043	-0.208608	0.835291	0.980706	0	0
hilic	pm2.5	lur	1	0	378.21	33.845	0.112465	-0.286845	0.511776	16.9834	0.554574	0.579657	0.963739	0.134994	-0.361347	0.631336	16.9356	0.536676	0.592154	0.964792	0.00251891	-0.667712	0.67275	17.0886	0.00748064	0.99405	0.999568	0	0
hilic	pm2.5	lur	1	0	123.015	146.757	0.0607646	-0.155008	0.276537	18.4873	0.554505	0.579704	0.963739	0.122195	-0.125624	0.370014	18.4828	0.972964	0.331877	0.961983	-0.0216363	-0.476096	0.432823	18.4974	-0.0947628	0.924743	0.992091	0	0
hilic	pm2.5	lur	1	0	595.493	36.799	0.170587	-0.435343	0.776518	20.1446	0.554338	0.579818	0.963739	0.458506	-0.278197	1.19521	20.0946	1.22809	0.221016	0.961983	-0.678192	-1.78565	0.429268	20.2547	-1.21892	0.226502	0.863871	0	0
hilic	pm2.5	lur	1	0	230.133	92.308	-0.199381	-0.908019	0.509258	16.4512	-0.553999	0.58005	0.963739	-0.474005	-1.3329	0.384888	16.5389	-1.08899	0.277616	0.961983	0.358189	-0.95688	1.67326	16.2579	0.542144	0.589245	0.927631	0	0
hilic	pm2.5	lur	1	0	399.282	38.554	-0.149474	-0.681707	0.382758	17.2407	-0.552989	0.580741	0.963739	0.00975132	-0.489347	0.50885	17.2868	0.0385527	0.96929	0.994389	-0.307729	-1.64905	1.0336	17.1393	-0.456652	0.649174	0.937675	0	0
hilic	pm2.5	lur	1	0	194.033	116.978	-0.0558348	-0.25473	0.143061	20.3868	-0.552753	0.580902	0.963739	-0.076483	-0.337776	0.184811	20.4174	-0.577583	0.564268	0.961983	0.0448135	-0.25348	0.343107	20.3193	0.29903	0.765702	0.965399	0	0
hilic	pm2.5	lur	1	0	281.095	150.668	0.0901951	-0.23114	0.41153	18.6545	0.552683	0.58095	0.963739	0.206136	-0.120248	0.53252	18.7427	1.24624	0.214295	0.961983	-0.234775	-1.00711	0.53756	18.4603	-0.605057	0.546875	0.920494	0	0
hilic	pm2.5	lur	1	0	115.075	29.318	-0.0525997	-0.239999	0.134799	21.2918	-0.552672	0.580957	0.963739	-0.0942525	-0.333927	0.145422	21.3602	-0.775979	0.43878	0.961983	0.0606624	-0.242955	0.36428	21.1411	0.397689	0.691932	0.944899	0	0
hilic	pm2.5	lur	1	0	304.742	66.064	0.137284	-0.352305	0.626873	16.0166	0.552127	0.58133	0.963739	-0.140329	-0.730464	0.449806	16.0289	-0.469219	0.639481	0.970577	0.699127	-0.216586	1.61484	15.9894	1.51966	0.132588	0.855884	0	0
hilic	pm2.5	lur	1	0	284.135	126.053	-0.203371	-0.929258	0.522516	16.6893	-0.551659	0.581651	0.963739	0.0945745	-0.825298	1.01445	17.0408	0.202873	0.839463	0.988245	-0.87119	-1.9777	0.235323	15.9153	-1.56714	0.121079	0.855884	0	0
hilic	pm2.5	lur	1	0	540.66	65.64	-0.0926324	-0.423635	0.238371	18.9886	-0.551038	0.582075	0.963739	-0.182475	-0.600218	0.235268	18.817	-0.861932	0.389872	0.961983	0.177413	-0.380771	0.735596	19.3665	0.632642	0.528794	0.920494	0	0
hilic	pm2.5	lur	1	0	185.128	46.393	-0.0426186	-0.194952	0.109715	25.8355	-0.550877	0.582185	0.963739	-0.156861	-0.342971	0.0292486	25.7603	-1.66312	0.0980281	0.883312	0.262293	-0.0147306	0.539317	26.0012	1.8846	0.0631606	0.855884	0	0
hilic	pm2.5	lur	1	0	241.155	71.551	-0.0335874	-0.153708	0.0865331	23.4286	-0.550567	0.582398	0.963739	-0.108986	-0.252315	0.0343427	23.475	-1.50043	0.135255	0.911545	0.186411	-0.0439286	0.416751	23.3265	1.61084	0.111202	0.855884	0	0
hilic	pm2.5	lur	1	0	108.081	30.716	0.078236	-0.201883	0.358355	20.1057	0.549941	0.582827	0.963739	0.15305	-0.161693	0.467794	19.9791	0.959523	0.338583	0.961983	-0.121339	-0.726217	0.483539	20.3843	-0.399285	0.69076	0.944899	0	0
hilic	pm2.5	lur	1	0	90.071	85.091	-0.0779929	-0.357311	0.201325	20.8611	-0.549804	0.582921	0.963739	-0.181832	-0.527384	0.163721	20.7938	-1.03832	0.300512	0.961983	0.108487	-0.391664	0.608637	21.0093	0.431743	0.667104	0.941473	0	0
hilic	pm2.5	lur	1	0	110.999	141.89	-0.0605914	-0.277594	0.156412	18.2568	-0.549789	0.582931	0.963739	-0.111768	-0.391175	0.167639	18.2524	-0.789328	0.430959	0.961983	0.0536815	-0.297248	0.404611	18.2665	0.304478	0.761564	0.964868	0	0
hilic	pm2.5	lur	1	0	585.195	102.316	0.126922	-0.32772	0.581564	15.7901	0.549691	0.582998	0.963739	0.217631	-0.345968	0.78123	15.9362	0.761955	0.447084	0.961983	0.0982977	-0.697223	0.893818	15.4683	0.245947	0.806361	0.9738	0	0
hilic	pm2.5	lur	1	0	141.951	286.3	-0.0928093	-0.425635	0.240017	19.4927	-0.549066	0.583426	0.963859	-0.174086	-0.574999	0.226828	19.6151	-0.856822	0.392682	0.961983	0.106238	-0.53154	0.744016	19.2232	0.331558	0.741101	0.95961	0	0
hilic	pm2.5	lur	1	0	133.097	121.446	0.062587	-0.162338	0.287513	28.3693	0.547894	0.584229	0.963981	0.201439	-0.0736145	0.476493	28.4184	1.44512	0.150162	0.920753	-0.25941	-0.66752	0.1487	28.2612	-1.2652	0.209518	0.855884	0	0
hilic	pm2.5	lur	1	0	582.508	35.832	0.16021	-0.415963	0.736384	15.6489	0.547506	0.584496	0.963981	0.364799	-0.387575	1.11717	15.9445	0.956749	0.339977	0.961983	-0.221528	-1.0499	0.606846	14.9977	-0.532296	0.596015	0.929487	0	0
hilic	pm2.5	lur	1	0	96.044	49.534	-0.0988002	-0.454186	0.256585	23.2082	-0.547405	0.584564	0.963981	0.152872	-0.279934	0.585677	23.1185	0.696968	0.486722	0.961983	-0.685024	-1.338	-0.0320507	23.4059	-2.08814	0.0400059	0.855884	0	0
hilic	pm2.5	lur	1	0	558.421	38.619	-0.0787691	-0.362994	0.205456	19.1447	-0.545689	0.585742	0.965338	-0.0867772	-0.436251	0.262696	18.8179	-0.48997	0.624752	0.969915	0.120996	-0.369037	0.61103	19.8646	0.491469	0.624457	0.93368	0	0
hilic	pm2.5	lur	1	0	300.884	66.439	0.0261238	-0.0683881	0.120636	22.1724	0.544253	0.586729	0.966377	0.0204481	-0.0956625	0.136559	22.1502	0.347504	0.728619	0.977684	0.0507982	-0.128219	0.229815	22.2214	0.564813	0.573801	0.925369	0	0
hilic	pm2.5	lur	1	0	666.608	42.889	0.180539	-0.47351	0.834588	15.7096	0.543515	0.587236	0.966498	0.344503	-0.44886	1.13787	15.4209	0.856839	0.392673	0.961983	-0.105023	-1.26783	1.05778	16.3453	-0.179774	0.85779	0.981364	0	0
hilic	pm2.5	lur	1	0	601.941	37.971	-0.126669	-0.586007	0.332669	18.277	-0.542986	0.587599	0.966498	-0.229188	-0.888536	0.430161	17.8534	-0.68589	0.493665	0.961983	0.0784897	-0.194762	0.351741	19.2098	0.571743	0.569119	0.925031	0	0
hilic	pm2.5	lur	1	0	551.257	117.381	0.116811	-0.307676	0.541298	18.4236	0.54184	0.588387	0.966498	0.205072	-0.336581	0.746726	18.3804	0.747074	0.455994	0.961983	-0.0880727	-0.776788	0.600642	18.5186	-0.254538	0.799742	0.973407	0	0
hilic	pm2.5	lur	1	0	291.973	80.07	0.121995	-0.321465	0.565455	17.7192	0.541675	0.588501	0.966498	0.220016	-0.309549	0.749582	17.7541	0.81981	0.413409	0.961983	-0.126405	-0.998738	0.745929	17.6424	-0.288424	0.773777	0.965845	0	0
hilic	pm2.5	lur	1	0	372.311	38.452	0.0470251	-0.124117	0.218168	23.7442	0.541032	0.588944	0.966498	-0.0602291	-0.27724	0.156782	23.7156	-0.547649	0.584612	0.963422	0.302487	0.0222681	0.582705	23.8071	2.14862	0.0347267	0.855884	0	0
hilic	pm2.5	lur	1	0	365.188	112.712	-0.0792165	-0.368133	0.2097	20.388	-0.539876	0.589739	0.966498	-0.0186845	-0.409516	0.372147	20.3918	-0.0943346	0.924948	0.990901	-0.164735	-0.537867	0.208397	20.3795	-0.878765	0.382193	0.895002	0	0
hilic	pm2.5	lur	1	0	147.555	96.563	0.0335163	-0.0887352	0.155768	20.9106	0.539825	0.589775	0.966498	-0.0061298	-0.159175	0.146915	20.9027	-0.0790329	0.937094	0.990901	0.0916028	-0.122842	0.306047	20.9278	0.850245	0.397758	0.901818	0	0
hilic	pm2.5	lur	1	0	228.973	74.805	0.110064	-0.2919	0.512028	20.2367	0.539151	0.590239	0.966498	0.248701	-0.24954	0.746941	20.1852	0.984954	0.325969	0.961983	-0.231436	-0.943873	0.481001	20.3503	-0.646599	0.519765	0.920494	0	0
hilic	pm2.5	lur	1	0	1060.34	66.942	0.154266	-0.409638	0.71817	17.6474	0.538662	0.590576	0.966498	0.172499	-0.522015	0.867012	17.1514	0.490098	0.624661	0.969915	0.00208446	-0.994203	0.998372	18.7397	0.00416447	0.996688	0.999568	0	0
hilic	pm2.5	lur	1	0	219.976	258.109	-0.0429796	-0.200175	0.114216	19.8355	-0.538359	0.590784	0.966498	-0.0549836	-0.240447	0.13048	19.7994	-0.584995	0.559284	0.961983	-0.0077744	-0.330209	0.31466	19.9149	-0.0479928	0.961843	0.998705	0	0
hilic	pm2.5	lur	1	0	345.955	67.28	-0.0675545	-0.314775	0.179666	21.7825	-0.538048	0.590999	0.966498	0.00160552	-0.304899	0.30811	21.8276	0.0103361	0.991765	0.996575	-0.220108	-0.660407	0.220191	21.683	-0.995036	0.322756	0.895002	0	0
hilic	pm2.5	lur	1	0	151.144	58.911	0.188968	-0.502745	0.880682	22.5941	0.537915	0.59109	0.966498	-0.0044624	-0.806093	0.797168	22.5322	-0.0109843	0.991248	0.996575	0.849804	-0.53098	2.23059	22.7305	1.22502	0.224207	0.863414	0	0
hilic	pm2.5	lur	1	0	146.106	75.228	-0.294839	-1.37542	0.785741	17.221	-0.537253	0.591547	0.966498	-0.0129257	-1.32305	1.2972	17.5678	-0.0194679	0.984489	0.996575	-0.735408	-2.74683	1.27602	16.4572	-0.727736	0.468926	0.914945	0	0
hilic	pm2.5	lur	1	0	224.128	37.245	0.0901265	-0.241206	0.421459	19.5888	0.535599	0.592688	0.966498	-0.103581	-0.495069	0.287907	19.5802	-0.522084	0.602254	0.967704	0.512506	-0.145378	1.17039	19.608	1.5506	0.124994	0.855884	0	0
hilic	pm2.5	lur	1	0	191.143	29.753	0.0616239	-0.16513	0.288377	18.884	0.535114	0.593023	0.966498	0.0531497	-0.236767	0.343066	18.8897	0.361748	0.717965	0.972575	0.138447	-0.23885	0.515744	18.8715	0.730383	0.467316	0.914432	0	0
hilic	pm2.5	lur	1	0	206.128	57.41	-0.0762418	-0.35694	0.204456	22.9664	-0.534816	0.593229	0.966498	-0.20365	-0.567319	0.160019	22.9653	-1.10498	0.270641	0.961983	0.238977	-0.200781	0.678735	22.9689	1.08166	0.282692	0.895002	0	0
hilic	pm2.5	lur	1	0	110.521	289.9	-0.114015	-0.533861	0.305832	23.019	-0.534713	0.5933	0.966498	-0.267694	-0.776029	0.240642	23.0167	-1.03912	0.300143	0.961983	0.133161	-0.631418	0.897741	23.0241	0.346662	0.729767	0.957048	0	0
hilic	pm2.5	lur	1	0	311.204	43.067	0.0596359	-0.159984	0.279256	23.5937	0.534672	0.593329	0.966498	-0.0427618	-0.306408	0.220884	23.6074	-0.320047	0.749304	0.98273	0.18671	-0.227136	0.600555	23.5636	0.898005	0.371911	0.895002	0	0
hilic	pm2.5	lur	1	0	214.012	90.947	-0.156278	-0.732168	0.419611	16.1467	-0.534331	0.593564	0.966498	-0.218878	-0.887197	0.449441	16.2555	-0.646243	0.518945	0.961983	0.00035875	-1.17897	1.17969	15.907	0.00060549	0.999518	0.999602	0	0
hilic	pm2.5	lur	1	0	249.969	127.843	-0.0614079	-0.288106	0.16529	20.0632	-0.533368	0.594229	0.967002	-0.197626	-0.485344	0.0900926	20.0314	-1.35536	0.177002	0.942491	0.261601	-0.117367	0.640569	20.1332	1.374	0.173326	0.855884	0	0
hilic	pm2.5	lur	1	0	328.992	108.256	-0.156874	-0.737419	0.423671	15.4515	-0.532068	0.595128	0.967885	-0.144551	-0.82108	0.531979	15.4217	-0.421611	0.673812	0.970577	-0.0538376	-1.24213	1.13446	15.5172	-0.0901802	0.928372	0.992091	0	0
hilic	pm2.5	lur	1	0	520.602	66.632	-0.0951264	-0.448323	0.25807	20.5798	-0.530317	0.59634	0.969275	-0.10868	-0.471079	0.253719	20.5708	-0.591753	0.554759	0.961983	-0.160889	-1.00877	0.686993	20.5995	-0.377696	0.706669	0.947714	0	0
hilic	pm2.5	lur	1	0	240.029	147.026	0.115845	-0.315005	0.546696	17.7126	0.529422	0.596959	0.969701	-0.101426	-0.65461	0.451758	17.7399	-0.361791	0.717932	0.972575	0.696506	0.0224082	1.3706	17.6524	2.05661	0.0430243	0.855884	0	0
hilic	pm2.5	lur	1	0	249.258	36.526	-0.089611	-0.423368	0.244146	17.4081	-0.528667	0.597482	0.969971	-0.122701	-0.484119	0.238717	17.5969	-0.669911	0.503773	0.961983	0.133158	-0.622534	0.88885	16.9922	0.35073	0.726724	0.954965	0	0
hilic	pm2.5	lur	1	0	335.073	277.797	0.123681	-0.337671	0.585032	16.4529	0.527862	0.59804	0.97011	0.0463648	-0.535863	0.628593	16.5366	0.157135	0.875314	0.989597	0.299253	-0.465191	1.0637	16.2685	0.77919	0.438196	0.905711	0	0
hilic	pm2.5	lur	1	0	603.432	38.62	-0.153194	-0.725912	0.419525	18.2062	-0.526684	0.598857	0.97011	-0.0420125	-0.849438	0.765414	17.823	-0.102672	0.918337	0.990901	-0.283701	-0.736323	0.16892	19.0502	-1.2476	0.215862	0.855884	0	0
hilic	pm2.5	lur	1	0	124.897	75.799	0.0990144	-0.271941	0.46997	18.5927	0.525567	0.599632	0.97011	0.287223	-0.157312	0.731759	18.5088	1.27495	0.203972	0.957234	-0.248694	-0.956855	0.459467	18.7774	-0.69901	0.486598	0.920114	0	0
hilic	pm2.5	lur	1	0	105.033	40.572	0.0694759	-0.192601	0.331553	21.8233	0.521983	0.602121	0.97011	0.0747015	-0.246721	0.396124	21.9063	0.458596	0.647077	0.970577	0.0705718	-0.413437	0.55458	21.6406	0.290221	0.772408	0.965845	0	0
hilic	pm2.5	lur	1	0	350.987	69.362	0.0239661	-0.0664546	0.114387	22.6371	0.521893	0.602184	0.97011	0.0638665	-0.0429115	0.170645	22.6375	1.18024	0.239463	0.961983	-0.0863182	-0.272525	0.0998885	22.6362	-0.922693	0.358976	0.895002	0	0
hilic	pm2.5	lur	1	0	140.038	74.233	0.0849701	-0.236292	0.406232	22.4117	0.520784	0.602956	0.97011	0.166773	-0.246033	0.579579	22.319	0.797181	0.426396	0.961983	-0.16145	-0.675966	0.353067	22.6159	-0.62458	0.534046	0.920494	0	0
hilic	pm2.5	lur	1	0	168.049	100.701	-0.0711415	-0.340149	0.197866	19.7415	-0.520727	0.602995	0.97011	-0.156316	-0.489234	0.176602	19.7524	-0.926495	0.355429	0.961983	0.0810115	-0.407551	0.569574	19.7176	0.330047	0.742238	0.95961	0	0
hilic	pm2.5	lur	1	0	709.991	34.81	0.128136	-0.35709	0.613362	15.7238	0.519971	0.603521	0.97011	0.197281	-0.485079	0.879641	15.2194	0.570493	0.569055	0.961983	0.0465164	-0.35002	0.443053	16.8347	0.233493	0.815983	0.980381	0	0
hilic	pm2.5	lur	1	0	251.111	91.601	0.145188	-0.405031	0.695407	18.2274	0.519572	0.603799	0.97011	-0.127287	-0.773401	0.518826	18.2439	-0.388736	0.697931	0.970577	0.652825	-0.456771	1.76242	18.1911	1.17107	0.245091	0.877873	0	0
hilic	pm2.5	lur	1	0	248.87	64.215	0.0345615	-0.0965814	0.165704	22.1565	0.518918	0.604254	0.97011	0.0252342	-0.137706	0.188175	22.1155	0.30559	0.76027	0.984574	0.0811856	-0.160346	0.322718	22.2469	0.669044	0.505418	0.920114	0	0
hilic	pm2.5	lur	1	0	1056.39	67.366	-0.147335	-0.706422	0.411752	19.2323	-0.518893	0.604272	0.97011	0.065045	-0.524563	0.654653	19.2256	0.217685	0.827921	0.988245	-0.660149	-1.95693	0.636634	19.2469	-1.01327	0.314024	0.895002	0	0
hilic	pm2.5	lur	1	0	419.817	37.472	0.17639	-0.493025	0.845806	17.9112	0.518836	0.604311	0.97011	0.278898	-0.670757	1.22855	17.3029	0.579506	0.562973	0.961983	0.0189157	-0.460403	0.498235	19.2508	0.0785503	0.937589	0.992091	0	0
hilic	pm2.5	lur	1	0	309.078	100.764	-0.124762	-0.598309	0.348786	17.095	-0.518763	0.604362	0.97011	-0.0564491	-0.496004	0.383106	17.1949	-0.253409	0.800241	0.986872	-0.133952	-1.37421	1.10631	16.8749	-0.214975	0.830341	0.980706	0	0
hilic	pm2.5	lur	1	0	150.128	24.055	0.0713533	-0.200021	0.342728	18.258	0.517721	0.605088	0.97011	0.118381	-0.23316	0.469922	18.2038	0.664481	0.507233	0.961983	-0.0486717	-0.480278	0.382934	18.3773	-0.22446	0.822979	0.980706	0	0
hilic	pm2.5	lur	1	0	90.039	85.097	-0.0833821	-0.400558	0.233793	20.8178	-0.517636	0.605147	0.97011	-0.290099	-0.684258	0.104059	20.7303	-1.45229	0.148161	0.920753	0.35291	-0.198102	0.903922	21.0106	1.27483	0.206105	0.855884	0	0
hilic	pm2.5	lur	1	0	244.191	130.518	-0.0489208	-0.235966	0.138124	19.5044	-0.514991	0.606992	0.97011	-0.0871386	-0.325256	0.150979	19.508	-0.7221	0.47117	0.961983	0.0193137	-0.282555	0.321182	19.4965	0.12735	0.898987	0.992091	0	0
hilic	pm2.5	lur	1	0	85.048	96.419	0.0226578	-0.0640659	0.109381	22.0193	0.514435	0.60738	0.97011	0.00252296	-0.104081	0.109127	22.0325	0.0466996	0.962804	0.993869	0.0385241	-0.125928	0.202976	21.9903	0.466277	0.6423	0.937675	0	0
hilic	pm2.5	lur	1	0	96.064	112.072	-0.0349791	-0.168897	0.0989387	20.2699	-0.514306	0.60747	0.97011	-0.0503446	-0.220113	0.119423	20.3154	-0.585161	0.559172	0.961983	-0.0094154	-0.235681	0.216851	20.1695	-0.0828264	0.934199	0.992091	0	0
hilic	pm2.5	lur	1	0	406.091	92.771	-0.15383	-0.743128	0.435468	18.1082	-0.513993	0.607688	0.97011	0.207002	-0.522338	0.936342	18.0917	0.560045	0.576145	0.963422	-0.948174	-1.9779	0.08155	18.1445	-1.83281	0.0705977	0.855884	0	0
hilic	pm2.5	lur	1	0	482.701	65.116	-0.0712959	-0.344449	0.201857	19.3491	-0.513937	0.607728	0.97011	-0.11565	-0.468895	0.237595	19.2346	-0.646023	0.519087	0.961983	0.0925544	-0.336539	0.521648	19.6012	0.429335	0.668848	0.941473	0	0
hilic	pm2.5	lur	1	0	415.32	38.783	0.123608	-0.350389	0.597606	16.8883	0.513479	0.608047	0.97011	0.274905	-0.343229	0.893039	17.0973	0.877563	0.381351	0.961983	0.00997367	-0.68399	0.703937	16.4282	0.0286067	0.97725	0.998705	0	0
hilic	pm2.5	lur	1	0	453.84	67.539	-0.0351939	-0.17023	0.0998426	22.6393	-0.513177	0.608259	0.97011	-0.0534342	-0.228022	0.121153	22.6591	-0.603927	0.546652	0.961983	-0.0032386	-0.223002	0.216524	22.5955	-0.0293328	0.976673	0.998705	0	0
hilic	pm2.5	lur	1	0	123.03	232.404	0.0963538	-0.273656	0.466364	19.8419	0.512751	0.608556	0.97011	-0.0028929	-0.446992	0.441206	19.8096	-0.0128539	0.989759	0.996575	0.41732	-0.300602	1.13524	19.9129	1.15702	0.250748	0.881327	0	0
hilic	pm2.5	lur	1	0	87.183	77.725	0.16117	-0.458017	0.780356	16.4701	0.512522	0.608716	0.97011	0.469142	-0.337864	1.27615	16.3841	1.14711	0.252858	0.961983	-0.536818	-1.47583	0.402193	16.6594	-1.13791	0.258598	0.884455	0	0
hilic	pm2.5	lur	1	0	219.141	50.608	-0.0599867	-0.29046	0.170486	22.9659	-0.512491	0.608738	0.97011	-0.112111	-0.38297	0.158748	22.9109	-0.816737	0.415158	0.961983	0.0398448	-0.428934	0.508623	23.0871	0.169182	0.866086	0.98273	0	0
hilic	pm2.5	lur	1	0	432.28	43.808	0.23013	-0.654562	1.11482	19.7143	0.512191	0.608947	0.97011	0.365839	-0.712768	1.44445	20.0628	0.669276	0.504177	0.961983	0.0316275	-1.63664	1.69989	18.9468	0.0377355	0.969994	0.998705	0	0
hilic	pm2.5	lur	1	0	257.147	74.625	0.0576879	-0.164097	0.279472	25.8415	0.512158	0.60897	0.97011	0.050328	-0.221211	0.321867	25.7728	0.365726	0.714999	0.972575	-0.0228178	-0.426671	0.381036	25.9927	-0.11246	0.910744	0.992091	0	0
hilic	pm2.5	lur	1	0	468.845	38.443	-0.178723	-0.866177	0.508731	17.0596	-0.511904	0.609148	0.97011	-0.305255	-1.25963	0.649122	16.6845	-0.631133	0.528754	0.961983	0.245032	-0.31564	0.805703	17.8858	0.86989	0.386996	0.895002	0	0
hilic	pm2.5	lur	1	0	93.045	118.193	-0.0286357	-0.138941	0.0816696	24.181	-0.511167	0.609663	0.97011	-0.0331383	-0.167903	0.101627	24.2511	-0.485211	0.628117	0.969915	-0.0479198	-0.254635	0.158795	24.0267	-0.461416	0.645768	0.937675	0	0
hilic	pm2.5	lur	1	0	246.955	138.586	0.0539217	-0.154084	0.261928	21.8309	0.510433	0.610176	0.97011	-0.0164736	-0.274304	0.241357	21.8084	-0.126076	0.899813	0.990901	0.182223	-0.181927	0.546374	21.8805	0.996031	0.322276	0.895002	0	0
hilic	pm2.5	lur	1	0	428.698	68.62	0.0225954	-0.0647616	0.109952	26.7237	0.509299	0.610969	0.97011	-0.0065763	-0.109087	0.0959347	26.7183	-0.126588	0.899408	0.990901	0.0689318	-0.117062	0.254926	26.7355	0.737685	0.462891	0.911684	0	0
hilic	pm2.5	lur	1	0	185.098	69.829	0.0604221	-0.173941	0.294785	23.8659	0.507641	0.61213	0.97011	0.0869247	-0.198355	0.372204	23.8125	0.601244	0.548434	0.961983	-0.0404441	-0.481142	0.400254	23.9834	-0.182669	0.855526	0.980706	0	0
hilic	pm2.5	lur	1	0	156.984	273.931	-0.0769617	-0.375619	0.221695	24.8904	-0.507403	0.612297	0.97011	0.131965	-0.250165	0.514095	24.8	0.681437	0.496471	0.961983	-0.438995	-0.895318	0.0173271	25.0896	-1.91487	0.0591289	0.855884	0	0
hilic	pm2.5	lur	1	0	511.359	48.271	-0.0269413	-0.131611	0.0777282	24.8171	-0.506815	0.61271	0.97011	0.0406287	-0.0770541	0.158312	24.8699	0.681237	0.496597	0.961983	-0.129921	-0.351044	0.0912023	24.7009	-1.16949	0.245724	0.87814	0	0
hilic	pm2.5	lur	1	0	174.994	161.671	0.0580963	-0.167793	0.283986	23.5758	0.506411	0.612992	0.97011	0.0104544	-0.265404	0.286313	23.5655	0.0747811	0.940472	0.990901	0.241332	-0.168451	0.651115	23.5984	1.17223	0.244628	0.877873	0	0
hilic	pm2.5	lur	1	0	525.702	35.894	-0.110227	-0.539109	0.318654	16.6588	-0.506061	0.613238	0.97011	0.0284601	-0.521152	0.578072	16.416	0.102178	0.918729	0.990901	-0.384071	-0.978336	0.210194	17.1933	-1.28642	0.202054	0.855884	0	0
hilic	pm2.5	lur	1	0	714.534	66.366	0.173392	-0.50287	0.849655	14.8423	0.504854	0.614084	0.97011	-0.386146	-1.20695	0.434656	14.8344	-0.928306	0.354492	0.961983	1.35625	0.157005	2.5555	14.8595	2.25103	0.027162	0.855884	0	0
hilic	pm2.5	lur	1	0	173.133	36.567	-0.113863	-0.558366	0.33064	17.0224	-0.504381	0.614416	0.97011	-0.09281	-0.632987	0.447367	17.0582	-0.339029	0.734983	0.981794	0.00265107	-0.824394	0.829696	16.9434	0.00638032	0.994925	0.999568	0	0
hilic	pm2.5	lur	1	0	332.044	103.107	-0.125459	-0.616558	0.36564	17.7172	-0.503017	0.615373	0.97011	-0.0695426	-0.69286	0.553775	17.7947	-0.220151	0.826003	0.988245	-0.266939	-1.08236	0.548481	17.5465	-0.651601	0.51655	0.920494	0	0
hilic	pm2.5	lur	1	0	217.926	70.01	0.0170927	-0.0498833	0.0840687	23.8527	0.502507	0.615731	0.97011	0.050828	-0.0333485	0.135005	23.8532	1.19149	0.23503	0.961983	-0.0611216	-0.188323	0.0660794	23.8517	-0.956433	0.341771	0.895002	0	0
hilic	pm2.5	lur	1	0	228.813	66.45	-0.0777195	-0.382586	0.227147	18.6945	-0.501963	0.616114	0.97011	-0.144936	-0.495897	0.206024	18.6918	-0.814886	0.416214	0.961983	0.155471	-0.481666	0.792608	18.7006	0.485699	0.628525	0.93368	0	0
hilic	pm2.5	lur	1	0	413.799	38.202	-0.14872	-0.732188	0.434749	16.4846	-0.501882	0.61617	0.97011	0.392789	-0.207146	0.992724	16.8227	1.29191	0.198044	0.957234	-1.22789	-2.60487	0.14909	15.7399	-1.77493	0.0797603	0.855884	0	0
hilic	pm2.5	lur	1	0	335.84	67.832	0.127669	-0.373299	0.628636	18.0396	0.501794	0.616232	0.97011	0.113922	-0.444166	0.67201	18.0008	0.402793	0.687578	0.970577	-0.0100323	-1.10726	1.0872	18.125	-0.0181993	0.985526	0.999158	0	0
hilic	pm2.5	lur	1	0	184.037	139.25	-0.127152	-0.626695	0.372391	17.6708	-0.501189	0.616657	0.97011	-0.112321	-0.769873	0.545231	17.6116	-0.337062	0.736463	0.981794	-0.0522907	-0.776492	0.67191	17.8012	-0.143719	0.886088	0.988701	0	0
hilic	pm2.5	lur	1	0	212.02	130.286	0.0922358	-0.270513	0.454985	18.3907	0.500661	0.617028	0.97011	-0.0567822	-0.539105	0.42554	18.1379	-0.232302	0.816568	0.988245	0.474279	-0.0318184	0.980376	18.9476	1.86531	0.0658507	0.855884	0	0
hilic	pm2.5	lur	1	0	212.118	40.59	-0.185231	-0.914587	0.544125	19.2291	-0.500063	0.617449	0.97011	-0.345307	-1.23413	0.543516	20.3161	-0.766598	0.444325	0.961983	0.0480353	-1.32457	1.42064	16.8353	0.0696572	0.944642	0.992536	0	0
hilic	pm2.5	lur	1	0	312.015	86.908	-0.129568	-0.640238	0.381101	21.9018	-0.499586	0.617785	0.97011	0.30636	-0.288402	0.901123	21.8863	1.01641	0.3108	0.961983	-0.893216	-1.88314	0.0967058	21.9358	-1.796	0.0763175	0.855884	0	0
hilic	pm2.5	lur	1	0	314.232	42.17	0.0405332	-0.119948	0.201015	26.2766	0.497322	0.619378	0.97011	-0.0978239	-0.28945	0.093802	26.2412	-1.00732	0.315132	0.961983	0.3421	0.0451286	0.639071	26.3544	2.29292	0.0245123	0.855884	0	0
hilic	pm2.5	lur	1	0	314.146	282.58	-0.0573108	-0.284358	0.169736	20.3574	-0.497018	0.619592	0.97011	-0.0568653	-0.33024	0.216509	20.416	-0.410457	0.681959	0.970577	-0.0479305	-0.4798	0.383939	20.2283	-0.220907	0.825735	0.980706	0	0
hilic	pm2.5	lur	1	0	477.358	38.102	-0.0777172	-0.3865	0.231065	20.8178	-0.495582	0.620603	0.97011	-0.032151	-0.449956	0.385654	20.4206	-0.151845	0.87948	0.990326	-0.0574829	-0.436024	0.321059	21.6925	-0.302256	0.763251	0.964868	0	0
hilic	pm2.5	lur	1	0	149.067	89.809	-0.105226	-0.523331	0.31288	15.8716	-0.49555	0.620626	0.97011	-0.120044	-0.527839	0.28775	15.9911	-0.580869	0.562055	0.961983	-0.169299	-1.1356	0.797001	15.6084	-0.348733	0.728217	0.955939	0	0
[truncated: 74,468 more rows]

## Sheet: Annotation
pollutant	year	mode	PD	mz	time	lower_mz	upper_mz	lower_time	upper_time	log2FC	log2LL	log2UL	P.Value	adj.P.Val	KEGGID	HMDBID	Metabolite_name	mz_diff	rt_diff	Best_Guess_Compound	Best_Guess_Name	ion	mz_Diff	chemical_ID	Confidence	score	Module_RTclust	MatchCategory	theoretical.mz	delta_ppm	Name	Formula	MonoisotopicMass	Adduct	ISgroup	mean_int_vec	MD
[truncated: 7,115 more rows]

[truncated: 1 more sheets: Pathway]
